# Supplementary material for: The BRD9/7 Inhibitor TP-472 Blocks Melanoma Tumor Growth by Suppressing ECM-Mediated Oncogenic Signaling and Inducing Apoptosis
Source: MDPI journal article supplement (doi:10.3390/cancers13215516), 2021-11-03
Supplement: s1 [file s1]

## Supplementary data

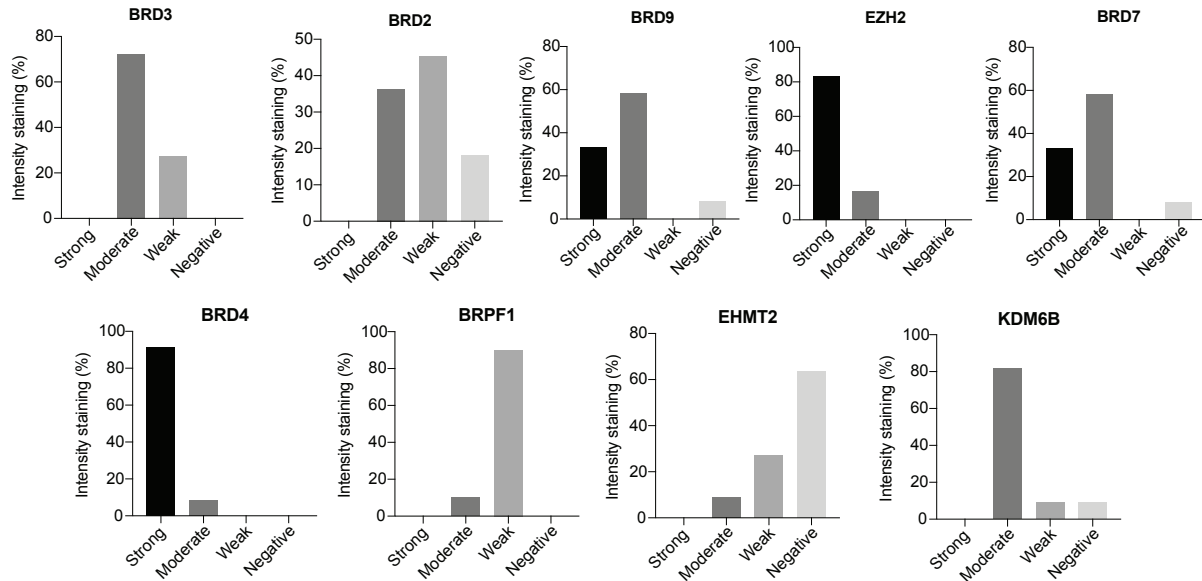

**Figure S1. Several Epigenetic regulators are overexpressed in melanoma samples.**

Immunohistochemical analysis of the expression of indicated epigenetic regulators using the Human Protein Atlas dataset. Relative intensity staining for each of the shown chromatin modifier is plotted.

**A**

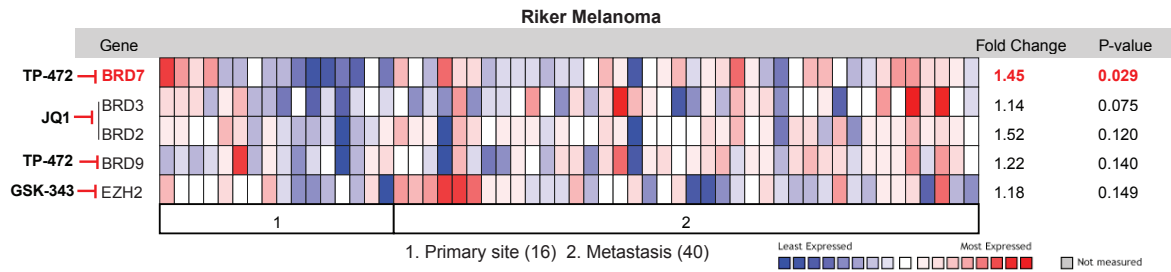

**B**

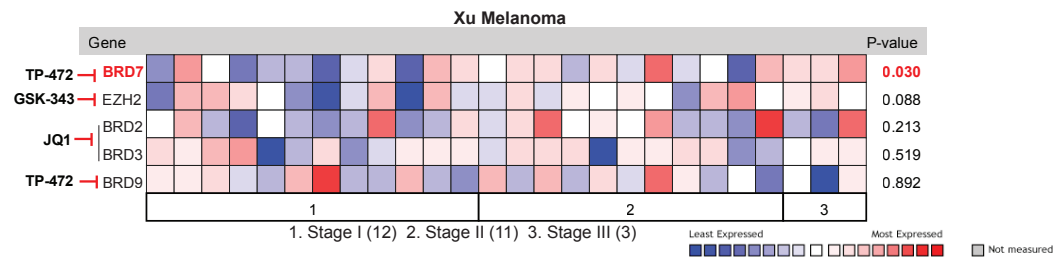

**C**

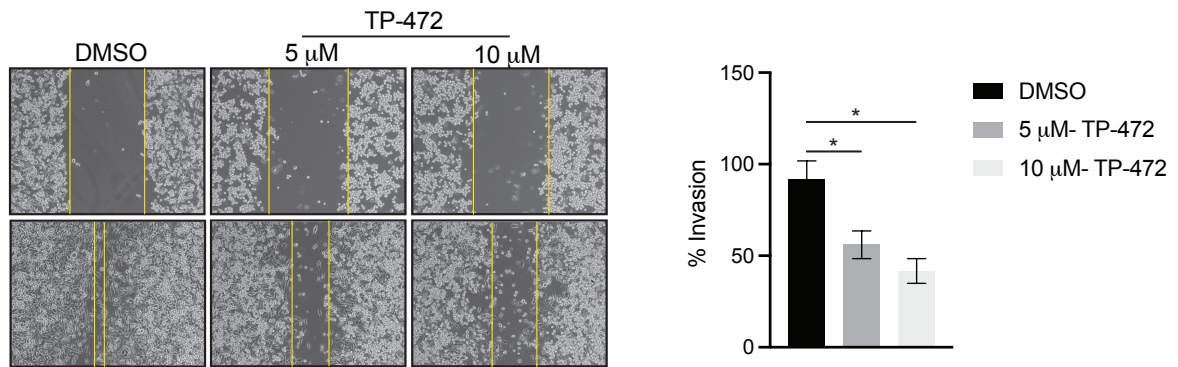

**D**

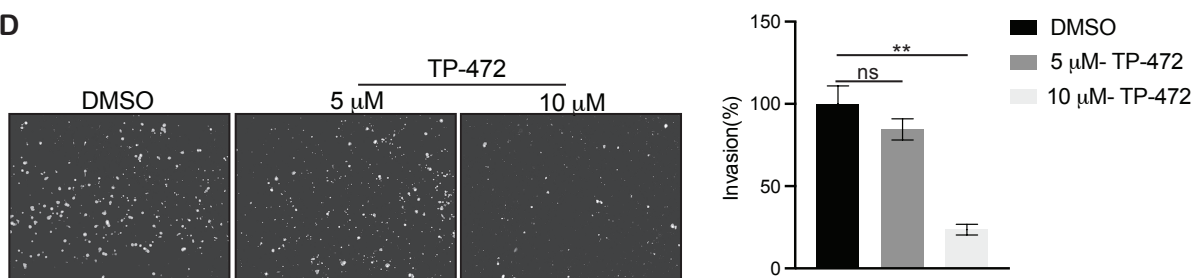

**Figure S2. TP-472 inhibits invasion and migration of melanoma cells in *in vitro* cell culture model.**

**A-B.** Indicated patient melanoma datasets were analyzed for the shown epigenetic regulators using Oncomine. Gene upregulation in patient's melanoma metastatic samples relative to the expression in primary site sample using Riker melanoma-patient dataset is shown (**A**) and gene upregulation in patient's melanoma samples at various stages using Xu melanoma patient dataset is shown (**B**).

**C.** M14 under indicated condition were analyzed for the migration using wound healing assay. Representative images showing the extent of migration in TP-472 treated cells relative DMSO treated cells is presented in left and the quantification is presented as bar diagram in right. **D.** M14 under indicated condition were analyzed for invasive capacity using Matrigel invasion assay. Representative images of TP-472 treated invaded cells relative DMSO treated invaded cells is shown in left and the quantification is presented as bar diagram in right. Data represent the mean  $\pm$  standard error of three biological replicates. ns=non-significant, \* $P$ <0.05, \*\* $p$ <0.01 and ns = not significant.

**Pearson correlation coefficients to check the significance of co-expression of ECM genes along with BRD7**

| Gene name |      | Pearson r | p-value |
|-----------|------|-----------|---------|
| CTSB      | BRD7 | <0.0001   | ****    |
| PLOD1     | BRD7 | <0.0001   | ****    |
| SPP1      | BRD7 | 0.011     | *       |
| SDC3      | BRD7 | <0.0001   | ****    |
| CD44      | BRD7 | 0.1324    | ns      |
| ICAM1     | BRD7 | 0.3224    | ns      |
| COL6A1    | BRD7 | 0.917     | ns      |
| MMP11     | BRD7 | 0.0344    | *       |
| TIMP2     | BRD7 | <0.0001   | ****    |
| COL4A2    | BRD7 | 0.0008    | ***     |
| MMP9      | BRD7 | 0.1695    | ns      |
| LOXL2     | BRD7 | 0.3182    | ns      |
| ITGA6     | BRD7 | 0.2462    | ns      |
| P4HA1     | BRD7 | 0.006     | **      |
| BGN       | BRD7 | 0.8885    | ns      |
| ITGB4     | BRD7 | 0.9356    | ns      |
| CTSS      | BRD7 | 0.0687    | ns      |
| COL4A1    | BRD7 | 0.0137    | *       |
| TNXB      | BRD7 | 0.6198    | ns      |
| LAMB1     | BRD7 | 0.0006    | ***     |
| COL6A2    | BRD7 | 0.0475    | *       |
| DDR2      | BRD7 | 0.7577    | ns      |
| ITGA10    | BRD7 | 0.1539    | ns      |
| LTBP3     | BRD7 | 0.0307    | *       |
| ITGB3     | BRD7 | 0.3924    | ns      |
| ITGA4     | BRD7 | 0.2561    | ns      |
| NID1      | BRD7 | 0.5377    | ns      |

**Figure S3.** Correlation of the mRNA expression levels of BRD7 and ECM genes performed using the Talantov melanoma dataset. ns, \*, \*\*, \*\*\*, and \*\*\*\* indicate non-significant *P*-value,  $P < 0.05$ ,  $< 0.01$ ,  $< 0.001$ , and  $< 0.0001$ , respectively.

## SUPPLEMENTARY TABLES

**Table S1:** List of inhibitors targeting indicated chromatin modifiers and the concentrations at which they were used in the chemical genetic screen.

**Table S2:** List of inhibitors targeting indicated chromatin modifiers that showed an effect on inhibiting M14 and SKMEL-28 melanoma cell growth.

**Table S3:** RNA sequencing data showing significant differentially expressed gene in A375 cell line upon TP-472 treatment (5  $\mu$ M and 10  $\mu$ M) in comparison to control treated cells.

**Table S4:** List of Reagents, data and software used in this study with source and identifier.

**Table S1:** List of inhibitors targeting indicated chromatin modifiers and the concentrations at which they were used in the chemical genetic screen.

| S.No. | Target protein        | Inhibitors     | Inhibitor concentrations ( $\mu\text{m}$ ) |
|-------|-----------------------|----------------|--------------------------------------------|
| 1     | BAZ2A/2B              | BAZ2-ICR       | 0.1, 0.5, 1, 2, 5, 10                      |
| 2     | BAZ2A/2B              | GSK2801        | 0.1, 0.5, 1, 2, 5, 10                      |
| 3     | BET family            | JQ1            | 0.1, 0.5, 1, 2, 5, 10                      |
| 4     | BRD9/7                | BI-9564        | 0.1, 0.5, 1, 2, 5, 10                      |
| 5     | BRD9/7                | TP-472         | 0.1, 0.5, 1, 2, 5, 10                      |
| 6     | BRD9                  | I-BRD9         | 0.1, 0.5, 1, 2, 5, 10                      |
| 7     | BRPF1/2/3; BRPF1B     | NI-57          | 0.1, 0.5, 1, 2, 5, 10                      |
| 8     | BRPF1/2/3; BRPF1B     | OF1            | 0.1, 0.5, 1, 2, 5, 10                      |
| 9     | BRPF1/2/3; BRPF1B     | PFI-4          | 0.1, 0.5, 1, 2, 5, 10                      |
| 10    | CECR2                 | NVS-CECR2-1    | 0.1, 0.5, 1, 2, 5, 10                      |
| 11    | CREBBP, EP300         | I-CBP112       | 0.1, 0.5, 1, 2, 5, 10                      |
| 12    | CREBBP, EP300         | SGC-CBP30      | 0.1, 0.5, 1, 2, 5, 10                      |
| 13    | DOT1L                 | SGC0946        | 0.1, 0.5, 1, 2, 5, 10                      |
| 14    | EED                   | A-395          | 0.1, 0.5, 1, 2, 5, 10                      |
| 15    | EZH2/H1               | GSK343/UNC1999 | 0.1, 0.5, 1, 2, 5, 10                      |
| 16    | G9a (EHMT2)/GLP       | A-366          | 0.1, 0.5, 1, 2, 5, 10                      |
| 17    | G9a (EHMT2)/GLP       | UNC0638        | 0.1, 0.5, 1, 2, 5, 10                      |
| 18    | G9a (EHMT2)/GLP       | UNCO642        | 0.1, 0.5, 1, 2, 5, 10                      |
| 19    | IDH1 mutant           | GSK864         | 0.1, 0.5, 1, 2, 5, 10                      |
| 20    | JMJD3/UTX (KDM6A/B)   | GSK-J4         | 0.1, 0.5, 1, 2, 5, 10                      |
| 21    | LSD1 (KDM1A)          | GSK-LSD1       | 0.1, 0.5, 1, 2, 5, 10                      |
| 22    | PAD4 (PADI4)          | GSK484         | 0.1, 0.5, 1, 2, 5, 10                      |
| 23    | PRMT Type I           | MS023          | 0.1, 0.5, 1, 2, 5, 10                      |
| 24    | PRMT3                 | SGC707         | 0.1, 0.5, 1, 2, 5, 10                      |
| 25    | PRMT4                 | TP-064         | 0.1, 0.5, 1, 2, 5, 10                      |
| 26    | PRMT4/6               | MS049          | 0.1, 0.5, 1, 2, 5, 10                      |
| 27    | PRMT5                 | GSK591         | 0.1, 0.5, 1, 2, 5, 10                      |
| 28    | SETD7                 | (R)-PFI-2      | 0.1, 0.5, 1, 2, 5, 10                      |
| 29    | SMARCA2/4, PB1        | PFI-3          | 0.1, 0.5, 1, 2, 5, 10                      |
| 30    | SMYD2                 | BAY-598        | 0.1, 0.5, 1, 2, 5, 10                      |
| 31    | SUV420H1/H2 (KMT5B/C) | A-196          | 0.1, 0.5, 1, 2, 5, 10                      |
| 32    | WDR5                  | OICR-9429      | 0.1, 0.5, 1, 2, 5, 10                      |

**Table S2:** List of inhibitors targeting indicated chromatin modifiers that showed an effect on inhibiting melanoma growth.

| S.No. | Target protein      | Inhibitors  |
|-------|---------------------|-------------|
| 1     | BET family          | JQ1         |
| 2     | BRD9/7              | TP-472      |
| 3     | EZH2/H1             | UNC1999     |
| 4     | BRPF1/2/3; BRPF1B   | OF1         |
| 5     | CECR2               | NVS-CECR2-1 |
| 6     | EZH2/H1             | GSK-343     |
| 7     | G9a (EHMT2) GLP     | UNCO642     |
| 8     | JMJD3/UTX (KDM6A/B) | GSK-J4      |

**Table S3:** Significant differentially expressed genes in TP-472 treated A375 melanoma cells

| Gene_symbc | NAME          | Foldchange | PValue     | FDR        | A1         | A2         |
|------------|---------------|------------|------------|------------|------------|------------|
| ABAT       | 4-aminobuty   | 1.6237486  | 0.00089983 | 0.00735293 | 5.10951601 | 4.17641524 |
| ABCA12     | ATP-binding   | 4.5530574  | 6.28E-05   | 0.00088155 | 0.28052245 | 0.38897985 |
| ABCA13     | ATP-binding   | 1.86693014 | 0.00090558 | 0.00739143 | 2.54473935 | 2.94805782 |
| ABCA2      | ATP-binding   | -1.5151398 | 0.00057295 | 0.0051781  | 71.5332242 | 73.455774  |
| ABCA3      | ATP-binding   | 1.72398809 | 2.83E-06   | 6.74E-05   | 7.05313583 | 8.92606395 |
| ABCA7      | ATP-binding   | 1.62517823 | 5.34E-06   | 0.00011489 | 10.659853  | 10.0315856 |
| ABCB1      | ATP-binding   | 2.13678721 | 3.70E-06   | 8.44E-05   | 5.71063554 | 6.22367762 |
| ABCB9      | ATP-binding   | 1.85659391 | 7.75E-09   | 4.47E-07   | 29.7353795 | 31.9577657 |
| ABCC3      | ATP-binding   | -1.8436964 | 0.0002903  | 0.00299829 | 76.5225163 | 76.5471402 |
| ABCC9      | ATP-binding   | 2.32499915 | 0.02199457 | 0.08097282 | 0.38070904 | 0.36850723 |
| ABCG1      | ATP-binding   | -1.9776014 | 1.35E-05   | 0.00025111 | 7.15332242 | 8.12763163 |
| ABCG4      | ATP-binding   | 2.1880745  | 0.01529916 | 0.06224044 | 0.62115685 | 0.49134297 |
| ABI2       | abl-interact  | -1.5840938 | 6.15E-06   | 0.0001297  | 63.9791554 | 65.4919234 |
| ABI3BP     | ABI family; n | -2.0764177 | 0.00651471 | 0.03322873 | 3.14585888 | 2.66144109 |
| ABL2       | ABL proto-or  | 1.59072019 | 0.00080015 | 0.00665822 | 103.292373 | 110.818312 |
| ACACA      | acetyl-CoA c  | -1.5502555 | 0.00020631 | 0.0023024  | 129.340886 | 130.656285 |
| ACE        | angiotensin I | -3.7734426 | 6.35E-06   | 0.00013259 | 3.10578424 | 3.68507227 |
| ACER2      | alkaline cera | 4.28558252 | 8.35E-11   | 8.88E-09   | 1.22227638 | 2.39529698 |
| ACHE       | acetylcholine | 2.96860112 | 0.0001498  | 0.00178941 | 0.98182857 | 1.02363119 |
| ACRC       | acidic repeat | 2.55085835 | 0.0001216  | 0.00150295 | 2.16403031 | 1.57639203 |
| ACSL5      | acyl-CoA syn  | -2.0136524 | 0.00242438 | 0.01569366 | 3.70690377 | 4.11499737 |
| ACSS1      | acyl-CoA syn  | -1.527372  | 0.00214101 | 0.01425106 | 12.4832489 | 11.8945944 |
| ACSS2      | acyl-CoA syn  | -1.5478084 | 5.27E-05   | 0.00076217 | 34.123552  | 32.5719444 |
| ACTA2      | actin; alpha  | 2.85637266 | 4.17E-26   | 5.94E-23   | 19.4161609 | 21.168693  |
| ACTA2-AS1  | ACTA2 antis   | 2.37431718 | 0.04218891 | 0.12815525 | 0.54100758 | 0.12283574 |
| ACTN2      | actinin; alph | 2.64021809 | 0.01425617 | 0.05899092 | 0.64119417 | 0.45039772 |
| ACTR3B     | ARP3 actin-r  | 1.51506382 | 0.00109127 | 0.00849357 | 11.8821294 | 10.5638739 |
| ADAM19     | ADAM metal    | -1.6477481 | 0.02219108 | 0.08133875 | 329.413503 | 338.678615 |
| ADAM9      | ADAM metal    | -1.5395524 | 0.00014626 | 0.00175301 | 193.119668 | 197.970272 |
| ADAMTS10   | ADAM metal    | -4.2767586 | 8.31E-07   | 2.44E-05   | 2.32432885 | 2.57955059 |
| ADAMTS16   | ADAM metal    | -2.6246718 | 0.00623446 | 0.03215203 | 2.42451544 | 2.57955059 |
| ADAMTSL3   | ADAMTS-like   | -1.7589491 | 0.00449312 | 0.02506958 | 4.40820989 | 4.13547    |
| ADAMTSL4   | ADAMTS-like   | -2.1619234 | 2.88E-06   | 6.83E-05   | 49.512212  | 50.6492711 |
| ADAP1      | ArfGAP with   | -1.7750159 | 0.0090968  | 0.04248471 | 2.92544838 | 3.17325668 |
| ADCY1      | adenylate cy  | 1.68483717 | 0.01840696 | 0.0709926  | 1.56291078 | 1.86300876 |
| ADGRA2     | adhesion G p  | -2.110726  | 8.66E-07   | 2.50E-05   | 17.8933247 | 20.841131  |
| ADGRB2     | adhesion G p  | -1.5857411 | 4.99E-06   | 0.00010816 | 28.5331404 | 29.5624687 |
| ADGRE2     | adhesion G p  | 1.50659554 | 0.01825118 | 0.07050482 | 3.78705305 | 4.77012133 |
| ADGRF1     | adhesion G p  | -1.6934818 | 0.00038198 | 0.00374647 | 55.7037432 | 60.1485686 |
| ADGRG1     | adhesion G p  | -1.6549166 | 4.29E-06   | 9.59E-05   | 249.705053 | 259.019636 |



|         |                |            |            |            |            |            |
|---------|----------------|------------|------------|------------|------------|------------|
| ADGRL3  | adhesion G p   | -2.3258266 | 0.00049076 | 0.00458311 | 10.279144  | 9.47882479 |
| ADI1    | acireductone   | 1.70147032 | 9.75E-08   | 3.95E-06   | 81.1310994 | 81.7881319 |
| ADM     | adrenomedu     | -1.6314695 | 9.41E-06   | 0.00018514 | 22.7824302 | 22.8269755 |
| ADORA1  | adenosine A:   | -1.8813291 | 8.21E-06   | 0.00016401 | 21.2996687 | 20.7797131 |
| ADPRHL1 | ADP-ribosylh   | 1.75670909 | 0.00340037 | 0.02029258 | 3.54660523 | 3.05042094 |
| ADRB2   | adrenoceptor   | 1.72675287 | 0.00365597 | 0.021432   | 6.87279997 | 6.22367762 |
| AEBP1   | AE binding p   | -1.7112851 | 3.00E-08   | 1.44E-06   | 192.618735 | 199.853753 |
| AEN     | apoptosis en   | 1.8801372  | 1.31E-10   | 1.29E-08   | 84.2368836 | 85.20706   |
| AFAP1   | actin filamer  | -2.5021962 | 1.10E-09   | 8.46E-08   | 311.079357 | 325.432827 |
| AFAP1L2 | actin filamer  | -2.2616435 | 2.36E-05   | 0.00039773 | 9.59787518 | 9.92922252 |
| AGAP2   | ArfGAP with    | -1.8864438 | 3.98E-05   | 0.00061327 | 9.69806177 | 10.3591476 |
| AGMO    | alkylglycerol  | -2.1345504 | 3.84E-07   | 1.28E-05   | 25.7078786 | 28.293166  |
| AIFM2   | apoptosis-inc  | 1.60585729 | 0.00032191 | 0.00324641 | 26.6496325 | 23.8096614 |
| AIM1    | absent in me   | -2.3106723 | 2.15E-06   | 5.37E-05   | 89.8272952 | 88.9126049 |
| AIMP2   | aminoacyl tR   | 1.68573244 | 6.57E-05   | 0.00090938 | 26.4091847 | 24.2805318 |
| AJAP1   | adherens jun   | 1.94633342 | 1.52E-09   | 1.14E-07   | 20.3378775 | 21.8033443 |
| AK1     | adenylate kir  | 1.50989216 | 3.26E-05   | 0.00051667 | 39.5536651 | 39.6554722 |
| AK4     | adenylate kir  | -1.7583517 | 6.22E-06   | 0.00013094 | 69.2088953 | 72.9439584 |
| AK5     | adenylate kir  | -1.6785495 | 0.0108358  | 0.04822642 | 5.75071018 | 4.89295707 |
| AKNA    | AT-hook tran   | -1.7236633 | 0.00030623 | 0.00312558 | 8.25537489 | 6.9811647  |
| AKR1C1  | aldo-keto rec  | -1.51309   | 0.02765961 | 0.095097   | 5.8909714  | 7.39061717 |
| AKR1C2  | aldo-keto rec  | -1.8012715 | 0.00030231 | 0.00309498 | 8.31548685 | 8.16857687 |
| AKR1C3  | aldo-keto rec  | -1.5552393 | 3.68E-06   | 8.42E-05   | 26.6496325 | 26.7781919 |
| ALDOC   | aldolase C; fi | -1.8800363 | 1.93E-08   | 9.91E-07   | 103.492746 | 102.813516 |
| ALG10B  | ALG10B; alpl   | -1.5804037 | 0.00092689 | 0.00751798 | 18.4543696 | 17.7702374 |
| ALOXE3  | arachidonate   | 2.31674824 | 0.04116863 | 0.1258701  | 1.0219032  | 0.67559658 |
| ALPK2   | alpha-kinase   | -1.8564143 | 1.50E-06   | 3.96E-05   | 38.8924337 | 38.5908958 |
| ALPL    | alkaline phos  | 2.72543482 | 0.00551577 | 0.02934124 | 0.80149271 | 0.75748708 |
| ALPP    | alkaline phos  | 3.12333515 | 9.62E-21   | 6.53E-18   | 8.07503903 | 9.90874989 |
| ALPPL2  | alkaline phos  | 3.76346132 | 0.00777852 | 0.03813269 | 0.32059708 | 0.20472624 |
| AMACR   | alpha-methy    | -1.5551456 | 0.00052463 | 0.00483157 | 65.0411333 | 65.7375948 |
| AMDHD1  | amidohydroli   | 2.23176883 | 0.02868261 | 0.09748531 | 0.46085831 | 0.36850723 |
| AMOT    | angiomotin     | -1.7269752 | 2.95E-05   | 0.00047775 | 29.2544838 | 33.5751029 |
| AMOTL1  | angiomotin l   | -1.5858565 | 0.00019625 | 0.0022126  | 260.585317 | 278.468628 |
| AMZ2P1  | archaelysin f  | 2.22959591 | 4.39E-05   | 0.00065917 | 4.96925479 | 4.09452475 |
| ANG     | angiogenin; i  | -2.4839003 | 0.00043625 | 0.00415849 | 2.92544838 | 3.05042094 |
| ANGPTL4 | angiopoietin   | -1.8831345 | 5.13E-09   | 3.18E-07   | 53.4595636 | 53.1264586 |
| ANK1    | ankyrin 1; en  | 2.02818666 | 0.00851898 | 0.04050849 | 1.00186589 | 1.5559194  |
| ANK2    | ankyrin 2; ne  | -1.7640133 | 0.0020538  | 0.01380598 | 8.0349644  | 7.71817915 |
| ANKDD1A | ankyrin repe   | -1.7389557 | 0.03439581 | 0.11079897 | 2.38444081 | 2.43624223 |
| ANKH    | ANKH inorga    | -2.184918  | 3.40E-08   | 1.61E-06   | 186.226831 | 187.304035 |
| ANKRA2  | ankyrin repe   | 1.5799306  | 2.43E-05   | 0.00040555 | 15.8094437 | 17.1970039 |
| ANKRD1  | ankyrin repe   | 2.32185803 | 1.72E-07   | 6.45E-06   | 11.160786  | 11.3418336 |

|           |                 |            |            |            |            |            |
|-----------|-----------------|------------|------------|------------|------------|------------|
| ANKRD20A1 | ankyrin repe    | 2.49460203 | 4.19E-09   | 2.65E-07   | 4.1877994  | 3.2756198  |
| ANKRD24   | ankyrin repe    | 2.27616688 | 0.00071126 | 0.00608047 | 1.28238833 | 1.00315856 |
| ANKRD30A  | ankyrin repe    | -1.6569614 | 0.01117355 | 0.04940442 | 6.63235216 | 7.28825405 |
| ANKRD36C  | ankyrin repe    | -1.6460277 | 0.00140532 | 0.01041998 | 6.67242679 | 6.91974683 |
| ANLN      | anillin actin l | -1.8464832 | 5.18E-05   | 0.00075249 | 239.145387 | 250.503024 |
| ANO1      | anoctamin 1     | -2.1127478 | 1.15E-05   | 0.00021815 | 51.6962797 | 54.5390697 |
| ANO6      | anoctamin 6     | -1.5687276 | 0.00013821 | 0.00167482 | 116.777488 | 120.849898 |
| ANXA10    | annexin A10     | 2.32163272 | 0.0003701  | 0.00364247 | 1.60298542 | 1.49450153 |
| AOAH      | acyloxyacyl h   | -3.6870006 | 0.00432055 | 0.02430802 | 1.08201516 | 1.65828252 |
| AOC2      | amine oxida     | 3.14622825 | 0.000106   | 0.00134872 | 1.10205247 | 0.73701445 |
| AOC3      | amine oxida     | 5.07424963 | 2.26E-05   | 0.00038584 | 0.26048513 | 0.30708936 |
| AOX1      | aldehyde oxi    | 1.70357386 | 0.00405926 | 0.02314867 | 2.84529911 | 2.72285896 |
| AP1S3     | adaptor-rela    | 1.67593729 | 7.30E-05   | 0.00099037 | 5.97112067 | 6.42840386 |
| AP5Z1     | adaptor-rela    | 1.6815938  | 4.92E-05   | 0.00072398 | 22.5019078 | 19.694664  |
| APLP1     | amyloid beta    | 1.88721269 | 1.58E-10   | 1.55E-08   | 11.0405621 | 12.3654647 |
| APOBEC3B  | apolipoprote    | -2.0746863 | 7.28E-08   | 3.07E-06   | 22.3215719 | 22.1923241 |
| APOBEC3D  | apolipoprote    | -2.0148449 | 7.83E-09   | 4.50E-07   | 27.3309013 | 26.2868489 |
| APOBEC3F  | apolipoprote    | -1.8429327 | 2.35E-07   | 8.25E-06   | 46.7470622 | 44.0980315 |
| APOBEC3G  | apolipoprote    | -2.5239471 | 4.37E-08   | 1.97E-06   | 204.300491 | 201.593926 |
| APOBEC3H  | apolipoprote    | 2.23572689 | 0.00159658 | 0.01140012 | 1.16216443 | 0.75748708 |
| APOL1     | apolipoprote    | -1.6121436 | 0.01371334 | 0.05752981 | 6.09134458 | 6.14178712 |
| AQP3      | aquaporin 3     | 2.20632001 | 5.72E-11   | 6.37E-09   | 9.0568676  | 9.02842707 |
| ARC       | activity-regul  | 14.4785164 | 4.99E-12   | 6.78E-10   | 1.64306005 | 1.00315856 |
| AREG      | amphiregulin    | 2.88276781 | 1.52E-07   | 5.78E-06   | 18.9953772 | 20.4316785 |
| ARHGAP11A | Rho GTPase      | -1.6066772 | 0.00063837 | 0.0055997  | 86.9218842 | 96.3032221 |
| ARHGAP18  | Rho GTPase      | -1.5946003 | 5.39E-07   | 1.69E-05   | 65.2214691 | 66.1675199 |
| ARHGAP24  | Rho GTPase      | -1.5046564 | 0.0043337  | 0.02436274 | 11.1808233 | 9.94969514 |
| ARHGAP26  | Rho GTPase      | -1.5478236 | 0.00018242 | 0.00207976 | 38.6720232 | 39.3483828 |
| ARHGAP28  | Rho GTPase      | -2.0070147 | 0.00604956 | 0.03142993 | 2.9454857  | 3.33703767 |
| ARHGAP33  | Rho GTPase      | -1.8145289 | 0.00901055 | 0.04218081 | 2.18406763 | 2.70238633 |
| ARHGEF16  | Rho guanine     | -2.4813923 | 7.30E-05   | 0.00099037 | 3.06570961 | 3.48034604 |
| ARHGEF17  | Rho guanine     | -1.5983172 | 0.0005751  | 0.00518547 | 15.7292944 | 16.3576264 |
| ARHGEF39  | Rho guanine     | -1.5770842 | 0.00218199 | 0.01446975 | 14.066197  | 15.1702142 |
| ARHGEF40  | Rho guanine     | -1.9619523 | 1.90E-07   | 6.93E-06   | 53.4395263 | 54.2933982 |
| ARID3B    | AT rich inter   | 1.81968563 | 1.89E-06   | 4.84E-05   | 10.1188454 | 8.76228296 |
| ARL14     | ADP-ribosyla    | 2.55748902 | 0.00063342 | 0.00557904 | 0.5610449  | 0.96221332 |
| ARL14EPL  | ADP-ribosyla    | 1.76632864 | 0.00780143 | 0.03819242 | 1.5829481  | 1.80159089 |
| ARL6IP1   | ADP-ribosyla    | -1.5611239 | 2.37E-08   | 1.19E-06   | 213.858292 | 204.501039 |
| ARL6IP6   | ADP-ribosyla    | -1.7813211 | 1.11E-08   | 6.11E-07   | 22.5419824 | 22.4584682 |
| ARNTL     | aryl hydrocar   | 1.78459802 | 2.46E-06   | 5.95E-05   | 9.53776323 | 9.72449628 |
| ARPIN     | actin-related   | -1.6272132 | 0.0013751  | 0.01024386 | 34.8248582 | 39.0208209 |
| ARRDC3    | arrestin dom    | -1.5504446 | 8.53E-07   | 2.48E-05   | 52.4176231 | 55.0713579 |
| ARRDC4    | arrestin dom    | 2.18589823 | 0.00014302 | 0.00172    | 3.00559766 | 3.05042094 |

|            |                |            |            |            |            |            |
|------------|----------------|------------|------------|------------|------------|------------|
| ARSG       | arylsulfatase  | 1.75282789 | 0.03959841 | 0.1225444  | 1.16216443 | 1.00315856 |
| ARSJ       | arylsulfatase  | -1.55515   | 0.00080958 | 0.0067195  | 27.0103043 | 25.0175462 |
| ART3       | ADP-ribosylti  | -4.646219  | 3.48E-08   | 1.64E-06   | 4.92918015 | 5.32288217 |
| ARVCF      | armadillo re   | 1.93179617 | 0.00031001 | 0.00315573 | 3.18593351 | 2.9275852  |
| ASAP3      | ArfGAP with    | -2.4248767 | 1.28E-06   | 3.46E-05   | 7.63421804 | 6.59218485 |
| ASCC3      | activating sig | 1.68808409 | 6.42E-06   | 0.00013387 | 68.9283729 | 76.3628866 |
| ASF1B      | anti-silencing | -1.5642451 | 3.25E-05   | 0.00051667 | 63.7988196 | 60.1076233 |
| ASIC1      | acid sensing   | -1.5565686 | 0.00020993 | 0.00233364 | 22.5219451 | 21.4348371 |
| ASMTL-AS1  | ASMTL antis    | 1.99985157 | 0.03058674 | 0.10182005 | 0.30055977 | 0.65512396 |
| ASNS       | asparagine s   | 1.68444766 | 0.000573   | 0.0051781  | 34.0434028 | 34.0664459 |
| ASPH       | aspartate be   | -1.572622  | 7.03E-05   | 0.00096173 | 270.163155 | 268.826022 |
| ASPM       | abnormal spi   | -2.2183297 | 1.95E-05   | 0.00034109 | 167.471901 | 184.355977 |
| ASS1       | argininosucci  | -2.9732022 | 0.00920154 | 0.04275551 | 1.5829481  | 1.10552168 |
| ASTN2      | astrotactin 2  | 2.60111967 | 1.71E-10   | 1.63E-08   | 4.34809794 | 4.95437495 |
| ATAD2      | ATPase fami    | -1.5634702 | 0.00072345 | 0.00615149 | 93.5141617 | 102.465482 |
| ATAD3B     | ATPase fami    | 1.91042517 | 6.58E-09   | 3.92E-07   | 49.3118389 | 44.343703  |
| ATF3       | activating tra | 20.015805  | 1.39E-14   | 3.25E-12   | 3.6267545  | 3.64412703 |
| ATG101     | autophagy re   | 1.64242578 | 0.00011567 | 0.0014435  | 73.476844  | 68.828961  |
| ATG4A      | autophagy re   | 2.25296913 | 2.64E-09   | 1.78E-07   | 9.09694224 | 9.06937232 |
| ATOH8      | atonal bHLH    | -5.5611986 | 7.68E-17   | 2.81E-14   | 11.6216443 | 11.1575799 |
| ATP10A     | ATPase; clas   | -1.637662  | 0.0058281  | 0.03050175 | 11.1808233 | 12.0379028 |
| ATP5E      | ATP synthase   | 1.58868269 | 0.00058354 | 0.00524012 | 101.609238 | 102.404064 |
| ATP5I      | ATP synthase   | 1.63107365 | 0.00189226 | 0.01301707 | 39.1529188 | 36.9735585 |
| ATP6V0B    | ATPase; H+ t   | 1.57441859 | 0.00010219 | 0.00131076 | 92.7327063 | 91.0212852 |
| ATP6V0E2   | ATPase; H+ t   | 1.56974256 | 1.89E-05   | 0.00033127 | 33.0816115 | 33.6365208 |
| ATP6V1B1-A | ATP6V1B1 ai    | 1.99800893 | 0.00258944 | 0.01654035 | 1.74324664 | 1.78111827 |
| ATP8B3     | ATPase; ami    | -2.4041725 | 0.00050989 | 0.00472459 | 2.78518716 | 2.57955059 |
| ATP9A      | ATPase; clas   | -2.2306903 | 9.59E-08   | 3.90E-06   | 79.5080766 | 81.7676592 |
| ATRNL1     | attractin-like | -1.6513067 | 0.00890535 | 0.04180175 | 4.06757549 | 3.82838064 |
| ATXN1      | ataxin 1       | -1.6475521 | 0.0007389  | 0.00626788 | 22.7223183 | 26.0207048 |
| AURKAPS1   | aurora kinase  | 2.04599589 | 0.00440995 | 0.02473285 | 1.5829481  | 1.61733728 |
| AURKB      | aurora kinase  | -1.6677805 | 2.44E-06   | 5.93E-05   | 58.969826  | 58.1217788 |
| AVPI1      | arginine vasc  | 2.04430808 | 1.10E-05   | 0.00021078 | 32.0597083 | 35.4381117 |
| B3GNT4     | UDP-GlcNAc     | -2.027521  | 0.03614639 | 0.11488005 | 1.04194052 | 1.53544678 |
| B3GNT5     | UDP-GlcNAc     | -1.6088486 | 0.00281077 | 0.01756854 | 19.4762728 | 22.1718515 |
| B3GNT7     | UDP-GlcNAc     | -3.4296944 | 4.46E-13   | 7.47E-11   | 79.027181  | 73.3329383 |
| B4GALNT3   | beta-1;4-N-a   | -2.7603003 | 1.10E-05   | 0.00021078 | 3.22600815 | 2.98900307 |
| B4GALNT4   | beta-1;4-N-a   | -2.2936465 | 3.56E-09   | 2.34E-07   | 51.2955333 | 49.9327293 |
| BAGE4      | B melanoma     | 23.8290413 | 0.00383049 | 0.02217237 | 0.08014927 | 0.14330837 |
| BAHCC1     | BAH domain     | -1.6582148 | 0.00104833 | 0.00825859 | 41.2768745 | 42.275968  |
| BAK1       | BCL2-antago    | 1.56117294 | 6.89E-05   | 0.00094633 | 22.3616466 | 22.0080705 |
| BARD1      | BRCA1 assoc    | -1.6327645 | 0.00071443 | 0.00609298 | 8.13515099 | 8.27093999 |
| BARX1      | BARX homec     | -1.9556693 | 9.53E-05   | 0.00123487 | 13.9860478 | 14.3513092 |

|           |                |            |            |            |            |            |
|-----------|----------------|------------|------------|------------|------------|------------|
| BAX       | BCL2-associa   | 2.38532272 | 2.03E-15   | 5.37E-13   | 110.18521  | 101.503269 |
| BBC3      | BCL2 binding   | 2.70479215 | 1.02E-10   | 1.06E-08   | 12.7637714 | 13.1843697 |
| BCAM      | basal cell ad  | -1.9538236 | 1.73E-09   | 1.29E-07   | 61.7750505 | 58.6131218 |
| BCL3      | B-cell CLL/ly  | -1.5617209 | 2.50E-05   | 0.00041549 | 32.7009025 | 35.908982  |
| BCRP2     | breakpoint cl  | -2.5917594 | 0.04036942 | 0.12426897 | 1.84343323 | 1.74017302 |
| BCYRN1    | brain cytopla  | 4.30449553 | 3.27E-07   | 1.11E-05   | 1.32246297 | 1.10552168 |
| BEND5     | BEN domain     | -2.685257  | 0.00179231 | 0.01251458 | 2.20410495 | 1.96537188 |
| BEST3     | bestrophin 3   | 2.46186448 | 0.00314938 | 0.01922136 | 0.64119417 | 0.63465134 |
| BGN       | biglycan       | -5.767678  | 4.48E-54   | 6.39E-50   | 90.6688626 | 83.7535037 |
| BHLHE41   | basic helix-lc | -1.5983898 | 0.00012574 | 0.0015408  | 11.0205247 | 11.7308134 |
| BIN1      | bridging inte  | -1.5039443 | 0.00149305 | 0.01086693 | 12.363025  | 10.7481275 |
| BISPR     | BST2 interfer  | -2.113086  | 0.00296953 | 0.01833569 | 2.62488862 | 2.10868025 |
| BLOC1S2   | biogenesis o   | 2.184692   | 3.78E-10   | 3.31E-08   | 30.5168349 | 33.5955756 |
| BMF       | Bcl2 modifyi   | -1.9262084 | 0.00012436 | 0.00152776 | 8.17522562 | 7.82054227 |
| BMP4      | bone morphc    | -2.0258571 | 0.00103715 | 0.00818862 | 11.922204  | 11.7922313 |
| BMP8B     | bone morphc    | -1.8505133 | 0.0002554  | 0.0027223  | 16.8313469 | 16.9718051 |
| BMS1P20   | BMS1 riboso    | 1.62437457 | 0.0012468  | 0.00949157 | 4.30802331 | 4.0535795  |
| BMX       | BMX non-rec    | -7.2208068 | 5.67E-07   | 1.75E-05   | 4.62862039 | 4.4016141  |
| BNIP3     | BCL2/adenov    | -1.715566  | 2.74E-08   | 1.35E-06   | 218.12624  | 232.732787 |
| BNIP3L    | BCL2/adenov    | -1.665528  | 2.67E-09   | 1.78E-07   | 116.23648  | 111.473436 |
| BOC       | BOC cell adh   | -2.081402  | 0.00097885 | 0.00782927 | 3.86720232 | 4.60634034 |
| BOLA2     | bolA family r  | 1.70731096 | 0.00095046 | 0.00764455 | 22.9627661 | 23.0521743 |
| BOLA2B    | bolA family r  | 1.70731096 | 0.00095049 | 0.00764455 | 22.9627661 | 23.0521743 |
| BRCAT54   | NA             | -2.0471513 | 0.00569324 | 0.02993391 | 2.36440349 | 2.45671485 |
| BRF2      | BRF2; RNA p    | 1.56319218 | 0.00522249 | 0.02816025 | 7.27354633 | 7.37014455 |
| BRINP2    | bone morphc    | 1.778175   | 0.00140833 | 0.01042993 | 2.2642169  | 2.94805782 |
| BRIP1     | BRCA1 intera   | -1.5565415 | 0.0017975  | 0.01254462 | 22.0210122 | 23.7482435 |
| BRMS1     | breast cance   | 1.65208608 | 0.00016603 | 0.00194263 | 39.6939264 | 37.2397026 |
| BSCL2     | Berardinelli-  | 2.30799127 | 0.00150552 | 0.01093538 | 15.9897795 | 15.0269058 |
| BSN       | bassoon pres   | 1.59549525 | 0.02648802 | 0.09233755 | 1.88350786 | 1.9858445  |
| BST2      | bone marrow    | -3.1103587 | 1.01E-06   | 2.85E-05   | 5.99115799 | 5.3433548  |
| BTBD3     | BTB (POZ) de   | -1.8095883 | 1.91E-08   | 9.84E-07   | 114.633495 | 116.857736 |
| BTG2      | BTG family; i  | 4.15699849 | 6.96E-35   | 3.31E-31   | 21.0592209 | 20.3702606 |
| BTNL9     | butyrophilin-  | 2.97407449 | 0.00236314 | 0.0153777  | 0.50093294 | 0.26614411 |
| BUB1      | BUB1 mitoti    | -1.5061788 | 0.00012299 | 0.00151624 | 60.9535204 | 61.4178712 |
| BUB1B     | BUB1 mitoti    | -1.6843438 | 0.00014085 | 0.00170045 | 89.6469594 | 90.7346684 |
| C10orf10  | chromosome     | -10.17062  | 4.16E-34   | 1.48E-30   | 7.37373291 | 8.107159   |
| C10orf35  | chromosome     | 2.3489796  | 0.0001155  | 0.00144264 | 1.52283615 | 1.92442663 |
| C11orf91  | chromosome     | 3.08187792 | 6.41E-05   | 0.00089038 | 0.96179125 | 1.06457643 |
| C12orf45  | chromosome     | 1.64137915 | 0.00941658 | 0.04342981 | 8.17522562 | 7.86148752 |
| C12orf60  | chromosome     | 1.91023502 | 0.00719272 | 0.03567819 | 1.72320932 | 1.35119317 |
| C14orf132 | chromosome     | -1.9909296 | 0.00019079 | 0.00215792 | 4.16776208 | 5.07721069 |
| C15orf48  | chromosome     | -2.0601057 | 4.11E-05   | 0.00062845 | 10.0988081 | 9.13079019 |

|          |                |            |            |            |            |            |
|----------|----------------|------------|------------|------------|------------|------------|
| C16orf54 | chromosome     | -2.237783  | 0.0118564  | 0.0515643  | 1.48276151 | 2.4157696  |
| C17orf51 | chromosome     | 1.63150287 | 1.44E-05   | 0.00026367 | 15.8094437 | 16.4190442 |
| C17orf89 | chromosome     | 1.7470372  | 6.57E-06   | 0.00013665 | 32.7209398 | 27.5356789 |
| C17orf96 | chromosome     | -1.5146429 | 0.0003562  | 0.00353852 | 29.4147824 | 30.0742843 |
| C17orf97 | chromosome     | 1.57308536 | 0.0319065  | 0.10503498 | 2.18406763 | 2.4976601  |
| C18orf32 | chromosome     | 1.68537071 | 0.00057732 | 0.00519407 | 18.8951906 | 14.6583986 |
| C19orf33 | chromosome     | 1.72830076 | 0.00079016 | 0.00660061 | 15.2884734 | 12.6725541 |
| C19orf71 | chromosome     | -1.6622482 | 0.03219537 | 0.10557206 | 3.38630669 | 2.66144109 |
| C1QL1    | complement     | -2.0920715 | 0.00105816 | 0.00830602 | 3.92731427 | 4.54492247 |
| C1QL4    | complement     | -2.368333  | 0.00036622 | 0.00361178 | 2.86533643 | 2.76380421 |
| C1QTNF1  | C1q and tum    | -2.0004034 | 6.63E-06   | 0.00013769 | 37.8905678 | 37.2806478 |
| C1orf106 | chromosome     | -1.7303702 | 8.16E-07   | 2.41E-05   | 54.7018773 | 53.5359111 |
| C1orf116 | chromosome     | 2.60328119 | 0.00011916 | 0.00148054 | 0.88164198 | 1.53544678 |
| C1orf21  | chromosome     | -1.6914097 | 1.05E-05   | 0.00020263 | 20.3779521 | 20.5545142 |
| C20orf24 | chromosome     | 1.61518889 | 1.82E-05   | 0.00032201 | 91.7108031 | 92.986657  |
| C21orf58 | chromosome     | -1.848178  | 3.45E-06   | 7.96E-05   | 10.9203381 | 11.1371073 |
| C22orf34 | chromosome     | 1.59803673 | 0.02157287 | 0.07985323 | 2.30429154 | 1.94489926 |
| C2orf72  | chromosome     | -3.0168053 | 0.0003828  | 0.00375195 | 3.40634401 | 2.19057074 |
| C3       | complement     | -2.5744197 | 1.15E-10   | 1.16E-08   | 190.675115 | 186.710329 |
| C3orf52  | chromosome     | 1.98793672 | 0.00032562 | 0.00327254 | 3.52656792 | 3.1937293  |
| C6orf141 | chromosome     | -2.3004903 | 4.50E-10   | 3.84E-08   | 13.6053387 | 13.6757127 |
| C6orf52  | chromosome     | 3.00374104 | 0.02293787 | 0.08313061 | 0.36067172 | 0.49134297 |
| C7orf43  | chromosome     | 1.64461574 | 0.00011081 | 0.00139872 | 25.1267964 | 23.8710793 |
| C8orf37  | chromosome     | -1.7001752 | 0.03943519 | 0.12211883 | 4.66869502 | 4.72917608 |
| C8orf48  | chromosome     | 1.80679355 | 0.01330907 | 0.05623242 | 1.26235102 | 1.2897753  |
| C9orf156 | chromosome     | 1.57055927 | 0.0045405  | 0.02522674 | 5.28985187 | 7.28825405 |
| C9orf43  | chromosome     | 1.73045745 | 0.04617023 | 0.13650872 | 0.76141807 | 0.8598502  |
| CA5B     | carbonic anh   | -1.5748632 | 0.00016464 | 0.00192788 | 15.0480256 | 14.310364  |
| CA9      | carbonic anh   | -3.8055935 | 2.53E-08   | 1.25E-06   | 79.1674422 | 81.1330079 |
| CAB39L   | calcium bind   | 1.64387806 | 0.00113268 | 0.00874895 | 4.82899357 | 4.38114148 |
| CACNA1A  | calcium char   | -1.8118723 | 0.01362421 | 0.05722328 | 3.20597083 | 2.8456947  |
| CACNA1B  | calcium char   | -11.096236 | 1.05E-12   | 1.61E-10   | 2.14399299 | 2.8456947  |
| CACNA2D2 | calcium char   | 2.36505186 | 0.00340021 | 0.02029258 | 0.64119417 | 0.59370609 |
| CACNG6   | calcium char   | -1.7619344 | 0.00132876 | 0.00996643 | 5.69059823 | 6.75596584 |
| CALB1    | calbindin 1; 2 | 5.11679527 | 6.68E-23   | 5.29E-20   | 5.91100872 | 7.24730881 |
| CALB2    | calbindin 2    | 1.79738656 | 4.30E-05   | 0.00064895 | 13.184555  | 14.5150902 |
| CALHM2   | calcium hom    | -1.7504363 | 4.22E-07   | 1.38E-05   | 47.0676593 | 45.3878068 |
| CAMK1D   | calcium/caln   | -5.0796345 | 6.13E-08   | 2.64E-06   | 2.34436617 | 1.92442663 |
| CAMK2D   | calcium/caln   | -1.5951326 | 2.33E-06   | 5.71E-05   | 52.4176231 | 53.3926027 |
| CAMK2N1  | calcium/caln   | -2.1422258 | 1.42E-16   | 4.70E-14   | 65.7224021 | 67.1297333 |
| CAMKK1   | calcium/caln   | -1.605701  | 0.00941675 | 0.04342981 | 7.27354633 | 5.17957381 |
| CARD9    | caspase recr   | 1.81897698 | 0.0330662  | 0.10770889 | 1.30242565 | 0.88032282 |
| CASC5    | cancer susce   | -1.6116004 | 0.00609901 | 0.03162272 | 50.0331823 | 52.3484989 |

|           |                 |            |            |            |            |            |
|-----------|-----------------|------------|------------|------------|------------|------------|
| CASZ1     | castor zinc fi  | 1.66111021 | 0.02312154 | 0.0835671  | 2.62488862 | 2.33387911 |
| CAT       | catalase        | -1.5363851 | 2.38E-05   | 0.00039869 | 106.939165 | 102.629263 |
| CAV1      | caveolin 1; c   | -1.7333394 | 3.13E-07   | 1.07E-05   | 441.86293  | 437.868477 |
| CBR3      | carbonyl red    | -1.6485113 | 0.01108773 | 0.04914811 | 4.28798599 | 3.60318178 |
| CBS       | cystathionine   | -1.5249959 | 0.00058074 | 0.00522151 | 17.9935113 | 16.4395169 |
| CBWD3     | COBW doma       | 1.51557713 | 0.00687403 | 0.03457396 | 9.0568676  | 11.587505  |
| CBX2      | chromobox h     | -1.6221745 | 3.84E-05   | 0.00059553 | 27.8318343 | 26.1640131 |
| CBX5      | chromobox h     | -1.5724815 | 6.77E-07   | 2.05E-05   | 170.136865 | 168.448748 |
| CBX7      | chromobox h     | -1.5215608 | 0.00046933 | 0.00442066 | 17.1920186 | 16.214318  |
| CCBE1     | collagen and    | -1.6187144 | 1.85E-05   | 0.00032703 | 14.9678763 | 15.5182488 |
| CCDC102B  | coiled-coil dc  | -1.9720689 | 1.02E-07   | 4.11E-06   | 32.6608279 | 34.3530626 |
| CCDC144CP | coiled-coil dc  | 6.22889894 | 2.38E-05   | 0.00039869 | 0.06011195 | 0.12283574 |
| CCDC159   | coiled-coil dc  | 1.65924471 | 0.02743947 | 0.0947057  | 1.46272419 | 1.31024792 |
| CCDC181   | coiled-coil dc  | 1.59906663 | 0.00407617 | 0.02322221 | 6.39190435 | 5.81422514 |
| CCDC64    | coiled-coil dc  | 6.14428281 | 1.52E-06   | 4.00E-05   | 0.26048513 | 0.24567148 |
| CCDC84    | coiled-coil dc  | 1.56956162 | 0.00069533 | 0.00597654 | 7.37373291 | 7.3291993  |
| CCDC85A   | coiled-coil dc  | 1.83484965 | 0.04182726 | 0.12728598 | 1.0219032  | 1.31024792 |
| CCL2      | chemokine (C    | -3.0794202 | 1.45E-14   | 3.34E-12   | 26.9101177 | 29.2553793 |
| CCL28     | chemokine (C    | -1.7443674 | 4.44E-05   | 0.00066442 | 12.0624653 | 11.1985252 |
| CCL3      | chemokine (C    | 141.87235  | 3.53E-12   | 4.98E-10   | 0.02003732 | 0          |
| CCNA1     | cyclin A1       | 1.92904839 | 6.88E-09   | 4.05E-07   | 8.09507635 | 8.70086509 |
| CCNA2     | cyclin A2       | -1.7819347 | 2.05E-06   | 5.20E-05   | 72.0141198 | 70.4667709 |
| CCNB2     | cyclin B2       | -1.7668823 | 1.02E-06   | 2.88E-05   | 64.8407601 | 68.3376181 |
| CCNF      | cyclin F        | -1.8375923 | 2.11E-07   | 7.57E-06   | 52.9385934 | 53.7406373 |
| CCNG2     | cyclin G2       | -1.9953129 | 5.64E-10   | 4.67E-08   | 43.9819124 | 41.3956452 |
| CCR10     | chemokine (C    | -2.2942315 | 0.00323072 | 0.01961468 | 2.42451544 | 1.88348138 |
| CD163L1   | CD163 molec     | 2.49339551 | 1.25E-05   | 0.00023573 | 1.50279883 | 2.64096846 |
| CD1D      | CD1d molecu     | 1.98588972 | 0.00043243 | 0.00413044 | 1.74324664 | 2.00631713 |
| CD24      | CD24 molecu     | 4.49271054 | 1.75E-14   | 3.83E-12   | 1.82339591 | 1.6378099  |
| CD274     | CD274 molec     | 1.88168017 | 0.00030771 | 0.00313446 | 4.44828453 | 4.36066886 |
| CD44      | CD44 molecu     | -1.5249241 | 6.99E-06   | 0.00014421 | 1137.33819 | 1161.24816 |
| CD55      | CD55 molecu     | 1.93965135 | 5.26E-16   | 1.60E-13   | 152.103279 | 151.292689 |
| CD68      | CD68 molecu     | 1.703239   | 5.36E-07   | 1.69E-05   | 55.3230342 | 53.0445681 |
| CD79B     | CD79b molec     | 6.2128872  | 0.00017789 | 0.00203951 | 0.16029854 | 0.18425361 |
| CDC25B    | cell division c | -1.5993055 | 1.21E-06   | 3.32E-05   | 237.201767 | 245.978574 |
| CDC25C    | cell division c | -1.9460412 | 2.97E-06   | 7.03E-05   | 10.5195918 | 12.4883005 |
| CDC42BPG  | CDC42 bindir    | 1.8800932  | 0.00157596 | 0.01129073 | 1.72320932 | 3.11183881 |
| CDC42EP4  | CDC42 effect    | -1.6544125 | 9.59E-08   | 3.90E-06   | 65.6422528 | 68.8699063 |
| CDC42EP5  | CDC42 effect    | -7.8240783 | 1.57E-07   | 5.96E-06   | 1.96365713 | 2.47718747 |
| CDC45     | cell division c | -1.6529779 | 1.25E-05   | 0.00023484 | 21.8807509 | 19.9812808 |
| CDCA2     | cell division c | -1.8302666 | 6.47E-07   | 1.97E-05   | 25.7479532 | 28.2317481 |
| CDCA3     | cell division c | -1.6815012 | 0.00042768 | 0.00409606 | 25.1468337 | 23.7687162 |
| CDCA7L    | cell division c | -1.9762606 | 1.49E-15   | 4.15E-13   | 72.5751647 | 71.6541831 |

|        |                 |            |            |            |            |            |
|--------|-----------------|------------|------------|------------|------------|------------|
| CDH10  | cadherin 10;    | 3.20547362 | 5.52E-05   | 0.00079279 | 0.48089562 | 1.06457643 |
| CDH11  | cadherin 11;    | -2.2759004 | 2.46E-06   | 5.95E-05   | 14.3667568 | 15.3954131 |
| CDH12  | cadherin 12;    | -1.76058   | 0.00015321 | 0.00182192 | 19.4562355 | 18.4253614 |
| CDK1   | cyclin-depen    | -2.0131398 | 7.91E-09   | 4.53E-07   | 83.2750924 | 85.0637517 |
| CDK18  | cyclin-depen    | -1.5518349 | 9.61E-05   | 0.00124295 | 26.0284757 | 23.8506067 |
| CDK19  | cyclin-depen    | -1.6034461 | 2.37E-05   | 0.00039867 | 29.7353795 | 30.3813736 |
| CDK5R2 | cyclin-depen    | 1.99751446 | 0.01881474 | 0.07213582 | 0.62115685 | 0.96221332 |
| CDKN1A | cyclin-depen    | 4.2355583  | 2.70E-29   | 4.82E-26   | 161.220258 | 156.451791 |
| CDKN1B | cyclin-depen    | -1.548971  | 6.79E-08   | 2.88E-06   | 59.1100872 | 55.1327757 |
| CDKN1C | cyclin-depen    | -3.3189732 | 6.11E-10   | 5.00E-08   | 25.4473935 | 24.4443128 |
| CDKN2C | cyclin-depen    | -2.0424131 | 1.41E-13   | 2.61E-11   | 47.4483683 | 45.2035532 |
| CDKN3  | cyclin-depen    | -1.6529693 | 5.84E-05   | 0.00083212 | 14.6673166 | 13.5528769 |
| CDON   | cell adhesior   | -1.8037133 | 2.84E-09   | 1.89E-07   | 48.4301969 | 53.1264586 |
| CDRT1  | CMT1A dupli     | 2.90209149 | 0.00041802 | 0.00402731 | 0.60111953 | 0.79843233 |
| CDT1   | chromatin lic   | -1.6274074 | 5.39E-07   | 1.69E-05   | 63.7988196 | 63.3218252 |
| CEBPD  | CCAAT/enhai     | -2.1202258 | 6.37E-05   | 0.00088725 | 10.8201516 | 12.4883005 |
| CELSR1 | cadherin; EG    | -1.5957884 | 0.00271538 | 0.0171225  | 26.6496325 | 25.4679439 |
| CELSR2 | cadherin; EG    | -1.6004756 | 0.00247959 | 0.01598218 | 70.6916568 | 75.6053995 |
| CEND1  | cell cycle exit | 1.95403457 | 1.23E-07   | 4.86E-06   | 9.43757664 | 8.80322821 |
| CENPA  | centromere p    | -1.5323279 | 0.00101395 | 0.00803659 | 18.7148547 | 17.5040933 |
| CENPE  | centromere p    | -1.52054   | 0.00074041 | 0.00627693 | 64.6604242 | 68.3785633 |
| CENPF  | centromere p    | -2.2972098 | 1.97E-07   | 7.13E-06   | 391.729561 | 409.432002 |
| CENPH  | centromere p    | -1.6610265 | 2.24E-09   | 1.53E-07   | 42.7395987 | 42.7263658 |
| CENPI  | centromere p    | -1.9970888 | 2.74E-05   | 0.00044762 | 5.63048627 | 6.14178712 |
| CENPK  | centromere p    | -1.6292599 | 4.42E-05   | 0.00066256 | 20.4781387 | 20.1450618 |
| CENPU  | centromere p    | -1.5482216 | 1.01E-07   | 4.08E-06   | 55.5835193 | 61.5816522 |
| CERKL  | ceramide kin    | -1.9160807 | 0.01780583 | 0.06938276 | 2.70503789 | 2.98900307 |
| CERS4  | ceramide syr    | -3.1382304 | 8.28E-06   | 0.00016478 | 3.64679182 | 3.6236544  |
| CES2   | carboxyleste    | 1.64376256 | 2.08E-09   | 1.47E-07   | 52.7582575 | 48.8272076 |
| CFAP53 | cilia and flag  | 2.09659581 | 0.0103358  | 0.04656828 | 0.60111953 | 0.79843233 |
| CFHR3  | complement      | 1.89289587 | 0.02030323 | 0.07638972 | 1.10205247 | 0.79843233 |
| CFI    | complement      | -1.9635461 | 1.90E-05   | 0.00033364 | 11.0605994 | 11.0347442 |
| CHAC1  | ChaC glutath    | 5.30806315 | 8.57E-05   | 0.00113154 | 3.44641864 | 2.43624223 |
| CHAF1B | chromatin as    | -1.6359206 | 0.00057422 | 0.00518251 | 15.328548  | 13.7985484 |
| CHCHD7 | coiled-coil-h   | 1.59008394 | 0.00016696 | 0.00194867 | 23.2232512 | 23.2159553 |
| CHEK2  | checkpoint ki   | -1.5007505 | 0.00145366 | 0.01064547 | 12.0223906 | 13.65524   |
| CHMP4C | charged muli    | 1.85904874 | 6.00E-07   | 1.84E-05   | 6.69246411 | 6.65360272 |
| CHRD1  | chordin-like    | -2.5574725 | 1.65E-10   | 1.59E-08   | 10.4594798 | 9.35598905 |
| CHRM4  | cholinergic r   | -3.0408973 | 0.01346683 | 0.05669595 | 0.86160466 | 1.53544678 |
| CHRN2  | cholinergic r   | 4.16106617 | 4.27E-06   | 9.56E-05   | 0.48089562 | 0.45039772 |
| CHST1  | carbohydrate    | -1.9091481 | 8.87E-07   | 2.55E-05   | 34.123552  | 34.168809  |
| CHST11 | carbohydrate    | -1.7920857 | 1.75E-06   | 4.52E-05   | 117.739279 | 114.667166 |
| CHST15 | carbohydrate    | -1.9918925 | 0.00127208 | 0.00962415 | 2.6048513  | 2.72285896 |

|           |                |            |            |            |            |            |
|-----------|----------------|------------|------------|------------|------------|------------|
| CHST2     | carbohydrate   | 1.97600568 | 2.53E-05   | 0.00041919 | 6.7926507  | 6.1213145  |
| CHSY3     | chondroitin s  | -1.5563539 | 0.0082231  | 0.03960374 | 5.57037432 | 5.05673806 |
| CIITA     | class II; majc | 2.32537385 | 8.20E-15   | 2.13E-12   | 14.0862343 | 15.2521047 |
| CILP2     | cartilage inte | 2.22155544 | 0.00012342 | 0.00152017 | 1.5829481  | 1.82206351 |
| CIT       | citron rho-int | -1.8251254 | 1.85E-06   | 4.76E-05   | 77.5444195 | 83.0369619 |
| CITED2    | Cbp/p300-int   | 1.77472747 | 1.84E-05   | 0.000325   | 27.4310879 | 28.6412006 |
| CITED4    | Cbp/p300-int   | -2.2662939 | 4.48E-08   | 2.00E-06   | 103.853418 | 99.0874989 |
| CKAP2L    | cytoskeleton   | -1.8347832 | 3.57E-07   | 1.19E-05   | 55.8440044 | 57.8761073 |
| CKMT1B    | creatine kina  | 8.09131189 | 8.14E-07   | 2.41E-05   | 0.48089562 | 0.18425361 |
| CLDN4     | claudin 4      | -1.6809745 | 1.93E-05   | 0.00033804 | 38.1310156 | 35.6837832 |
| CLEC11A   | C-type lectin  | -1.9497415 | 1.88E-07   | 6.92E-06   | 12.5032862 | 11.751286  |
| CLGN      | calmegin       | 1.56416092 | 0.00866238 | 0.04095807 | 3.52656792 | 3.50081866 |
| CLIC4     | chloride intra | -1.5909512 | 3.22E-06   | 7.49E-05   | 491.976261 | 506.922637 |
| CLIP3     | CAP-GLY don    | -1.6945658 | 3.61E-09   | 2.36E-07   | 86.28069   | 86.1078555 |
| CLMN      | calmin (calp   | -2.8398832 | 2.15E-13   | 3.82E-11   | 17.6128023 | 17.2379492 |
| CLP1      | cleavage anc   | 1.59157795 | 5.43E-06   | 0.00011633 | 26.0284757 | 24.0348603 |
| CMTM7     | CKLF-like MA   | -2.0327266 | 1.14E-11   | 1.46E-09   | 119.903309 | 125.968054 |
| CMTM8     | CKLF-like MA   | -1.5344506 | 0.00291672 | 0.0180811  | 10.5997411 | 9.97016776 |
| CMYA5     | cardiomyopa    | 3.35106502 | 0.00921839 | 0.04277799 | 0.5610449  | 0.18425361 |
| CNTNAP1   | contactin ass  | -1.6755453 | 0.00040404 | 0.00392233 | 77.1837478 | 75.8920162 |
| CNTNAP3   | contactin ass  | -2.1332705 | 1.45E-07   | 5.53E-06   | 40.6557176 | 39.1641292 |
| CNTNAP3B  | contactin ass  | -1.6573119 | 0.00012883 | 0.00157457 | 33.4422832 | 34.1483364 |
| CNTNAP3P2 | contactin ass  | -1.6831666 | 0.01416035 | 0.05878217 | 7.19339705 | 6.87880158 |
| CNTRL     | centriolin     | -2.3582749 | 7.54E-06   | 0.00015327 | 39.5536651 | 39.2460197 |
| COBL      | cordon-bleu '  | 1.69563429 | 3.24E-07   | 1.10E-05   | 9.55780054 | 11.0347442 |
| COCH      | cochlin        | -1.5068817 | 0.00615987 | 0.03184052 | 10.6197784 | 11.7308134 |
| COL13A1   | collagen; typ  | -2.0841136 | 1.34E-05   | 0.00024928 | 87.7033396 | 88.7897692 |
| COL1A1    | collagen; typ  | -2.5492985 | 2.75E-12   | 4.04E-10   | 10.2991813 | 10.0315856 |
| COL4A1    | collagen; typ  | -2.6213283 | 9.04E-07   | 2.59E-05   | 480.074095 | 500.064308 |
| COL4A2    | collagen; typ  | -2.5036278 | 3.53E-08   | 1.66E-06   | 935.12158  | 941.658802 |
| COL4A6    | collagen; typ  | 2.44504568 | 0.03889263 | 0.12099081 | 0.60111953 | 0.53228822 |
| COL5A1    | collagen; typ  | -1.6224656 | 3.03E-05   | 0.00048683 | 67.2652755 | 71.2447306 |
| COL5A2    | collagen; typ  | -1.9693929 | 1.19E-07   | 4.68E-06   | 348.989962 | 358.680368 |
| COL5A3    | collagen; typ  | 2.09475365 | 2.72E-06   | 6.52E-05   | 3.52656792 | 3.60318178 |
| COL6A1    | collagen; typ  | -1.9903008 | 3.87E-10   | 3.34E-08   | 256.137032 | 251.690436 |
| COL6A2    | collagen; typ  | -2.9705639 | 2.29E-22   | 1.72E-19   | 107.700583 | 102.772571 |
| COL6A3    | collagen; typ  | -5.2066131 | 3.39E-25   | 3.72E-22   | 60.2522143 | 61.6021248 |
| COL8A1    | collagen; typ  | -3.6336449 | 5.48E-10   | 4.59E-08   | 10.6999277 | 10.0930035 |
| COL8A2    | collagen; typ  | -2.3664463 | 0.00837155 | 0.04012882 | 1.10205247 | 1.22835742 |
| COL9A3    | collagen; typ  | -2.0503033 | 1.31E-06   | 3.50E-05   | 598.354381 | 578.085477 |
| COLEC12   | collectin sub  | -3.6706533 | 2.11E-09   | 1.48E-07   | 21.2595941 | 17.4836207 |
| COLQ      | collagen-like  | 1.52920377 | 0.04709783 | 0.13858996 | 1.88350786 | 1.65828252 |
| COMMD3-B1 | COMMD3-B1      | 19.9174931 | 0.01739873 | 0.06817414 | 0          | 0          |



|            |                |            |            |            |            |            |
|------------|----------------|------------|------------|------------|------------|------------|
| CORIN      | corin; serine  | 2.43545965 | 0.01296464 | 0.05515195 | 0.38070904 | 0.63465134 |
| COX6A1     | cytochrome c   | 1.53158662 | 0.00069068 | 0.00595099 | 147.775218 | 139.889438 |
| COX7B      | cytochrome c   | 1.50572521 | 0.00085559 | 0.00703984 | 55.4232208 | 54.4367065 |
| CPEB2      | cytoplasmic    | 1.99708714 | 8.59E-05   | 0.00113244 | 7.43384487 | 6.85832895 |
| CPEB4      | cytoplasmic    | 1.50973785 | 0.00023479 | 0.00254639 | 38.5317619 | 39.6554722 |
| CPED1      | cadherin-like  | -3.4799158 | 2.01E-05   | 0.00034788 | 3.04567229 | 2.98900307 |
| CPM        | carboxypepti   | 3.69636002 | 1.45E-07   | 5.53E-06   | 1.34250029 | 2.43624223 |
| CPNE2      | copine II      | -1.9834541 | 4.08E-09   | 2.61E-07   | 23.5438483 | 25.6521976 |
| CPQ        | carboxypepti   | -1.6533703 | 0.01967357 | 0.07444717 | 3.10578424 | 3.35751029 |
| CPS1       | carbamoyl-pl   | -1.591105  | 0.00180755 | 0.01259011 | 19.5964967 | 21.92618   |
| CRIP2      | cysteine-rich  | -1.8502487 | 7.62E-08   | 3.19E-06   | 102.671216 | 101.114289 |
| CRISPLD2   | cysteine-rich  | 2.01008841 | 0.03063917 | 0.10189874 | 1.04194052 | 1.14646693 |
| CRLF1      | cytokine rece  | -1.9412939 | 0.00152158 | 0.01101601 | 3.40634401 | 3.07089356 |
| CROT       | carnitine O-c  | 1.72960275 | 2.51E-06   | 6.06E-05   | 9.91847226 | 8.49613885 |
| CSAG3      | CSAG family,   | 1.54737937 | 0.00016012 | 0.00188279 | 32.6808652 | 29.0711257 |
| CSF2       | colony stimu   | -1.6383674 | 2.13E-05   | 0.00036562 | 22.3816839 | 26.4711025 |
| CSF3       | colony stimu   | -2.8725163 | 3.03E-05   | 0.00048683 | 2.48462739 | 3.02994831 |
| CSGALNACT1 | chondroitin s  | -1.6382417 | 0.01320477 | 0.05592308 | 12.9040326 | 13.8394937 |
| CSMD3      | CUB and Sus    | 3.5225083  | 4.84E-10   | 4.10E-08   | 2.74511252 | 2.35435173 |
| CSPG4      | chondroitin s  | -2.0754819 | 6.25E-06   | 0.00013143 | 696.557275 | 703.336989 |
| CSRNP2     | cysteine-seri  | 1.5016486  | 9.65E-06   | 0.00018831 | 29.8355661 | 35.8066189 |
| CT55       | cancer/testis  | 1.92830547 | 0.0060067  | 0.03124143 | 2.24417958 | 1.2897753  |
| CTDSP2     | CTD (carboxy   | -1.6422024 | 5.36E-07   | 1.69E-05   | 177.310224 | 182.247297 |
| CTDSPL     | CTD (carboxy   | -1.6751699 | 3.83E-06   | 8.71E-05   | 27.811797  | 28.3136386 |
| CTGF       | connective ti  | 2.59535006 | 1.42E-05   | 0.00026188 | 35.506127  | 34.7625151 |
| CTH        | cystathionine  | 1.57123731 | 0.00141263 | 0.01045243 | 6.91287461 | 6.42840386 |
| CTHRC1     | collagen tripl | -1.6779413 | 5.26E-07   | 1.67E-05   | 52.3975858 | 48.970516  |
| CTNNAL1    | catenin (cadl  | -1.6532862 | 2.37E-11   | 2.94E-09   | 96.0589011 | 102.21981  |
| CTNS       | cystinosis; ly | 1.57897722 | 3.61E-05   | 0.00056626 | 14.507018  | 13.3890959 |
| CTSB       | cathepsin B    | -1.5292325 | 9.74E-07   | 2.78E-05   | 324.865032 | 309.975996 |
| CTSS       | cathepsin S    | -1.8345962 | 2.77E-05   | 0.00045089 | 14.8476524 | 13.7576032 |
| CTSZ       | cathepsin Z    | -1.5260849 | 6.13E-06   | 0.00012936 | 263.190168 | 253.492027 |
| CUBN       | cubilin (intr  | -2.1257183 | 0.00537963 | 0.02882147 | 1.72320932 | 2.43624223 |
| CX3CL1     | chemokine (C   | -4.7898818 | 0.00308296 | 0.01891318 | 1.64306005 | 1.04410381 |
| CXADR      | coxsackie vir  | 1.6571313  | 0.00230559 | 0.01508585 | 3.54660523 | 3.93074376 |
| CXCL8      | chemokine (C   | -1.9236446 | 9.36E-16   | 2.78E-13   | 373.896348 | 378.415977 |
| CXXC5      | CXXC finger p  | -1.7778403 | 0.00011077 | 0.00139872 | 22.3616466 | 21.8852348 |
| CXorf40B   | chromosome     | 1.56771002 | 0.002801   | 0.01753057 | 14.4669434 | 11.1575799 |
| CXorf57    | chromosome     | 1.95333358 | 0.01624751 | 0.06491285 | 1.52283615 | 0.92126807 |
| CYCS       | cytochrome c   | 1.50875824 | 2.06E-05   | 0.00035444 | 122.367899 | 131.454717 |
| CYFIP2     | cytoplasmic    | 2.80473622 | 2.27E-33   | 6.46E-30   | 43.1203077 | 38.7546767 |
| CYGB       | cytoglobin     | -3.0209151 | 0.0013031  | 0.00981524 | 0.92171661 | 1.33072054 |
| CYP1A1     | cytochrome I   | 4.03913125 | 1.49E-06   | 3.94E-05   | 3.2861201  | 2.37482435 |

|         |                |            |            |            |            |            |
|---------|----------------|------------|------------|------------|------------|------------|
| CYP1B1  | cytochrome I   | 6.01417045 | 1.93E-10   | 1.82E-08   | 0.78145539 | 1.43308366 |
| CYP2E1  | cytochrome I   | 1.60806299 | 0.03502025 | 0.11235336 | 1.26235102 | 1.18741218 |
| CYP4F11 | cytochrome I   | 3.06021202 | 0.00453847 | 0.02522534 | 0.24044781 | 0.40945247 |
| CYP4F3  | cytochrome I   | 55.4342527 | 7.11E-07   | 2.14E-05   | 0.04007464 | 0          |
| CYP4X1  | cytochrome I   | -2.0294543 | 0.00236039 | 0.01536679 | 3.68686646 | 3.33703767 |
| CYR61   | cysteine-rich  | 2.03477489 | 0.00040618 | 0.00393243 | 82.2732265 | 77.099901  |
| CYSRT1  | cysteine-rich  | 1.85696    | 0.00962356 | 0.04416919 | 1.90354518 | 1.43308366 |
| DACH1   | dachshund fa   | -2.0896601 | 0.0052405  | 0.02822263 | 2.6048513  | 2.04726237 |
| DAPK1   | death-associ   | 2.03693108 | 4.69E-11   | 5.35E-09   | 12.0624653 | 11.9969575 |
| DAPK3   | death-associ   | 1.71950238 | 3.33E-08   | 1.58E-06   | 56.885945  | 52.5532252 |
| DCAF4L1 | DDB1 and CL    | 2.51225394 | 0.00698605 | 0.03495722 | 0.5610449  | 0.57323346 |
| DCBLD1  | discoidin; CU  | -1.5155379 | 0.03446076 | 0.11093299 | 18.1538098 | 16.3576264 |
| DCHS1   | dachshous cac  | -3.2570918 | 8.83E-07   | 2.55E-05   | 2.86533643 | 3.60318178 |
| DCLK1   | doublecortin-  | 1.64566642 | 0.0048066  | 0.02635585 | 5.24977724 | 5.3433548  |
| DCLRE1B | DNA cross-lit  | -1.5358934 | 0.00012434 | 0.00152776 | 19.616534  | 18.8143412 |
| DDB2    | damage-spei    | 2.12160142 | 1.93E-14   | 4.16E-12   | 44.8835916 | 45.3059163 |
| DDIT3   | DNA-damag      | 4.83193429 | 1.74E-05   | 0.00030846 | 10.3592933 | 8.70086509 |
| DDN     | dendrin        | 2.32424177 | 1.21E-06   | 3.32E-05   | 1.96365713 | 2.04726237 |
| DDR2    | discoidin dor  | -1.5513958 | 0.00389369 | 0.02246518 | 38.8323217 | 40.5153224 |
| DDX60   | DEAD (Asp-G    | -1.9296155 | 5.07E-05   | 0.00074023 | 8.97671833 | 11.8945944 |
| DENND2A | DENN/MADL      | -2.159461  | 7.43E-09   | 4.32E-07   | 25.8281025 | 27.044336  |
| DENND2C | DENN/MADL      | 3.51027186 | 0.00076423 | 0.00641786 | 0.58108221 | 0.38897985 |
| DEPDC1  | DEP domain     | -1.5430241 | 0.00565569 | 0.02981842 | 76.0416207 | 77.8369155 |
| DEPDC7  | DEP domain     | 3.06215975 | 7.29E-12   | 9.70E-10   | 11.160786  | 11.8945944 |
| DGKG    | diacylglycero  | 2.00700227 | 6.87E-10   | 5.59E-08   | 7.69433    | 8.37330311 |
| DHFR    | dihydrofolate  | -1.6764752 | 6.78E-09   | 4.03E-07   | 112.890248 | 112.599431 |
| DHRS12  | dehydrogena    | 1.88917305 | 0.00385199 | 0.02227869 | 1.32246297 | 1.16693955 |
| DHRS13  | dehydrogena    | -1.9035738 | 5.52E-10   | 4.60E-08   | 21.5401165 | 22.908866  |
| DHRS3   | dehydrogena    | -2.2455701 | 1.46E-16   | 4.74E-14   | 113.691741 | 106.130081 |
| DHTKD1  | dehydrogena    | -1.5208168 | 0.00023452 | 0.0025454  | 43.5410914 | 40.3924866 |
| DIAPH3  | diaphanous-i   | -1.6591135 | 0.00147807 | 0.01076339 | 17.6528769 | 19.3466294 |
| DIP2C   | disco-interac  | -1.5061681 | 0.01001376 | 0.04553482 | 14.56713   | 15.7434477 |
| DIRAS1  | DIRAS family   | -2.1069568 | 6.44E-05   | 0.00089243 | 4.20783672 | 4.23783311 |
| DISP2   | dispatched h   | 1.54720934 | 0.00276592 | 0.01736434 | 6.07130726 | 6.30556811 |
| DKK1    | dickkopf WN    | 2.67356361 | 4.22E-12   | 5.83E-10   | 118.781219 | 120.747535 |
| DKK3    | dickkopf WN    | -2.5798042 | 1.15E-10   | 1.16E-08   | 19.2157877 | 18.0773268 |
| DLG4    | discs; large f | -1.6707905 | 3.02E-08   | 1.45E-06   | 67.485686  | 67.9486382 |
| DLGAP5  | discs; large ( | -1.623128  | 7.03E-05   | 0.00096173 | 59.9716919 | 54.9075769 |
| DLL1    | delta-like 1 ( | 4.46651077 | 0.01249871 | 0.05374746 | 0.32059708 | 0.22519886 |
| DLL3    | delta-like 3 ( | 1.93749532 | 0.00145281 | 0.01064476 | 3.38630669 | 2.90711257 |
| DLL4    | delta-like 4 ( | 2.34033552 | 0.0161322  | 0.06458068 | 0.38070904 | 0.45039772 |
| DMBT1   | deleted in m   | 1.8324924  | 0.0002778  | 0.0028982  | 3.92731427 | 4.15594262 |
| DMKN    | dermokine      | 1.93644501 | 5.46E-06   | 0.00011675 | 8.47578539 | 8.39377573 |

|         |                |            |            |            |            |            |
|---------|----------------|------------|------------|------------|------------|------------|
| DNAH5   | dynein; axon   | 1.89529001 | 1.29E-06   | 3.48E-05   | 4.60858307 | 4.89295707 |
| DNAJB9  | DnaJ (Hsp40)   | 1.71785148 | 1.97E-05   | 0.00034352 | 16.0298542 | 16.705661  |
| DNMT3B  | DNA (cytosin   | -1.7770051 | 0.03685801 | 0.11631168 | 4.10765013 | 3.45987341 |
| DOCK1   | dedicator of   | -1.5095836 | 0.00149497 | 0.01087532 | 102.050059 | 113.356918 |
| DOCK11  | dedicator of   | -1.8804306 | 1.10E-05   | 0.00021116 | 19.0354518 | 18.8552865 |
| DOCK6   | dedicator of   | -1.5281909 | 0.00015922 | 0.00187528 | 38.9525456 | 34.8648782 |
| DOHH    | deoxyhypusir   | 1.6194764  | 0.00052707 | 0.00484911 | 20.938997  | 19.6741914 |
| DPF3    | D4; zinc and   | 1.87606636 | 0.0458972  | 0.1358706  | 1.16216443 | 0.75748708 |
| DPYSL2  | dihydropyrim   | -1.6614721 | 2.62E-09   | 1.77E-07   | 100.226663 | 96.2418042 |
| DPYSL3  | dihydropyrim   | -1.985567  | 8.62E-09   | 4.88E-07   | 228.225049 | 225.751622 |
| DQX1    | DEAQ box RM    | 2.51014882 | 0.01790467 | 0.0696396  | 0.60111953 | 0.47087035 |
| DRAM1   | DNA-damage     | 1.65918306 | 1.28E-08   | 6.86E-07   | 31.658962  | 33.6365208 |
| DRAP1   | DR1-associat   | 1.63896767 | 0.00035736 | 0.00354003 | 236.079677 | 218.627149 |
| DSC3    | desmocollin    | 1.78173205 | 1.10E-05   | 0.00021149 | 10.2991813 | 12.5497184 |
| DUSP1   | dual specifici | 1.88831472 | 4.08E-05   | 0.00062575 | 13.0442938 | 12.3449921 |
| DUSP10  | dual specifici | 2.74023972 | 6.45E-09   | 3.88E-07   | 9.67802445 | 10.0315856 |
| DUSP14  | dual specifici | 2.00825475 | 2.18E-07   | 7.74E-06   | 30.7973573 | 32.7152527 |
| DUSP5P1 | dual specifici | -1.987804  | 0.00014822 | 0.001775   | 4.22787403 | 4.25830574 |
| DUSP8   | dual specifici | 8.04197098 | 2.08E-06   | 5.24E-05   | 0.10018659 | 0.3480346  |
| DUSP9   | dual specifici | -1.8686997 | 0.00089871 | 0.007348   | 5.12955333 | 5.85517039 |
| DUT     | deoxyuridine   | -1.5523023 | 9.25E-07   | 2.64E-05   | 121.486257 | 121.750693 |
| DYNC1I1 | dynein; cytop  | 2.09359753 | 0.00026111 | 0.00276453 | 1.703172   | 1.88348138 |
| DYRK3   | dual-specific  | 1.99521662 | 5.58E-08   | 2.44E-06   | 18.5345189 | 19.2647389 |
| E2F1    | E2F transcrip  | -1.5123479 | 8.52E-05   | 0.00112707 | 37.6701573 | 38.7751494 |
| E2F2    | E2F transcrip  | -1.8285323 | 0.00556581 | 0.02947542 | 7.49395682 | 8.6189746  |
| E2F8    | E2F transcrip  | -1.5517363 | 0.00339286 | 0.02028172 | 5.85089677 | 6.039424   |
| EEF2    | ELL associate  | 1.68223723 | 0.02172915 | 0.08026494 | 2.30429154 | 1.71970039 |
| EBI3    | Epstein-Barr   | -1.765388  | 0.00015372 | 0.00182559 | 16.21019   | 15.0678511 |
| ECE1    | endothelin co  | -1.6353699 | 2.46E-08   | 1.22E-06   | 140.621896 | 138.763444 |
| ECM1    | extracellular  | -1.665051  | 4.65E-05   | 0.00068838 | 31.4585888 | 31.6711489 |
| EDA2R   | ectodysplasi   | 3.02388587 | 2.31E-30   | 5.49E-27   | 10.9403755 | 11.8331765 |
| EEF1A2  | eukaryotic tr  | -1.9089876 | 1.32E-14   | 3.19E-12   | 125.914504 | 125.497184 |
| EFCAB13 | EF-hand calc   | -1.5215325 | 0.03871857 | 0.12057936 | 3.847165   | 3.88979851 |
| EFEMP1  | EGF containi   | -1.6674487 | 8.90E-06   | 0.00017636 | 13.2847416 | 13.4709864 |
| EFEMP2  | EGF containi   | -2.1001415 | 8.61E-08   | 3.55E-06   | 28.1724687 | 27.5561516 |
| EFHD2   | EF-hand dom    | -1.5158549 | 3.47E-07   | 1.17E-05   | 177.350299 | 175.900783 |
| EFNA3   | ephrin-A3      | -2.1395274 | 2.14E-08   | 1.08E-06   | 14.8075778 | 15.5387214 |
| EFNA5   | ephrin-A5      | -1.6989144 | 0.00020272 | 0.00227482 | 10.8401889 | 10.0315856 |
| EFNB3   | ephrin-B3      | -2.2376374 | 1.25E-08   | 6.70E-07   | 17.151944  | 14.2080009 |
| EFR3B   | EFR3 homolo    | 3.12043067 | 1.55E-11   | 1.96E-09   | 3.04567229 | 4.23783311 |
| EGR1    | early growth   | 11.5162105 | 3.85E-11   | 4.50E-09   | 6.1113819  | 7.71817915 |
| EGR2    | early growth   | 4.45478748 | 0.00010294 | 0.00131685 | 0.66123148 | 0.38897985 |
| EID3    | EP300 intera   | 4.49451322 | 7.78E-06   | 0.00015765 | 0.5610449  | 0.36850723 |

|           |                |            |            |            |            |            |
|-----------|----------------|------------|------------|------------|------------|------------|
| EIF3C     | eukaryotic tr  | 2.65240696 | 0.02777689 | 0.09532349 | 14.9278017 | 3.64412703 |
| EIF4E3    | eukaryotic tr  | -1.6249926 | 0.02407542 | 0.08607168 | 3.58667987 | 3.80790802 |
| ELF3      | E74-like fact  | -6.2113121 | 1.72E-13   | 3.15E-11   | 7.8145539  | 7.94337801 |
| ELFN1-AS1 | ELFN1 antise   | 1.59190792 | 0.01713891 | 0.06741883 | 3.36626937 | 1.94489926 |
| ELMOD1    | ELMO/CED-1     | 2.00848267 | 1.19E-05   | 0.00022556 | 3.74697841 | 3.68507227 |
| ELMSAN1   | ELM2 and M     | -1.7332173 | 2.67E-06   | 6.42E-05   | 56.9059823 | 58.1013062 |
| EMC3-AS1  | EMC3 antise    | -1.8418644 | 6.18E-05   | 0.00086952 | 7.05313583 | 6.83785633 |
| EMILIN1   | elastin micr   | -1.9706764 | 8.74E-11   | 9.22E-09   | 126.3954   | 121.484549 |
| EMP1      | epithelial m   | -1.5603315 | 2.06E-08   | 1.05E-06   | 307.051856 | 300.108191 |
| EMP2      | epithelial m   | -1.5115158 | 0.00013229 | 0.00161    | 73.4968813 | 70.4872435 |
| EN2       | engrailed ho   | 1.80459583 | 1.06E-05   | 0.00020481 | 12.2227638 | 10.3182024 |
| ENO2      | enolase 2 (g   | -1.5884248 | 8.97E-07   | 2.58E-05   | 155.128914 | 154.609255 |
| ENOX2     | ecto-NOX dis   | 1.53293503 | 0.00020899 | 0.00232497 | 13.685488  | 12.9591708 |
| ENPP2     | ectonucleoti   | 1.93433951 | 0.02650101 | 0.09233884 | 0.82153003 | 0.98268594 |
| EPAS1     | endothelial F  | -1.9408558 | 4.49E-08   | 2.00E-06   | 14.7875405 | 14.4127271 |
| EPHA7     | EPH receptor   | -2.0520471 | 0.00193187 | 0.01319168 | 45.9255322 | 49.1547696 |
| EPHB3     | EPH receptor   | -1.8435116 | 5.45E-07   | 1.70E-05   | 12.9240699 | 12.7544446 |
| EPHB6     | EPH receptor   | 1.98726146 | 0.04039762 | 0.12428897 | 0.44082099 | 0.51181559 |
| EPHX2     | epoxide hydr   | 1.58566569 | 0.02506821 | 0.0886689  | 1.72320932 | 1.37166579 |
| EPPK1     | epiplakin 1    | 7.26952818 | 7.75E-05   | 0.00104446 | 0.16029854 | 0.02047262 |
| ERAP1     | endoplasmic    | -1.529119  | 0.00084254 | 0.00694454 | 103.733194 | 102.854462 |
| ERBB3     | erb-b2 recep   | -1.5942486 | 1.97E-05   | 0.00034288 | 212.175157 | 217.726354 |
| ERRFI1    | ERBB recept    | -1.6844285 | 6.08E-11   | 6.72E-09   | 397.420159 | 396.206687 |
| ESM1      | endothelial c  | 1.90307652 | 1.38E-07   | 5.31E-06   | 101.468977 | 105.045032 |
| ESPL1     | extra spindle  | -1.83233   | 7.62E-06   | 0.00015466 | 61.995461  | 65.839958  |
| ESPN      | espin          | -2.2512123 | 7.64E-07   | 2.28E-05   | 23.8644454 | 20.349788  |
| ESPNP     | espin pseud    | -1.9227436 | 0.01823725 | 0.07050482 | 2.76514984 | 1.86300876 |
| EVI2A     | ecotropic vir  | -2.2844216 | 0.02024962 | 0.07624696 | 1.04194052 | 1.57639203 |
| EVL       | Enah/Vasp-li   | -1.5384327 | 0.00236649 | 0.01539244 | 8.27541221 | 7.77959702 |
| EXO1      | exonuclease    | -1.612229  | 6.11E-06   | 0.00012923 | 44.6231065 | 43.422435  |
| F2R       | coagulation f  | -2.1810323 | 7.91E-11   | 8.54E-09   | 139.439694 | 145.355629 |
| F2RL1     | coagulation f  | -3.3067256 | 7.30E-13   | 1.18E-10   | 28.0522448 | 30.360901  |
| F8        | coagulation f  | 1.81692183 | 0.00077647 | 0.00650692 | 3.64679182 | 3.54176391 |
| FA2H      | fatty acid 2-h | 7.11461252 | 0.00382598 | 0.02215525 | 0.26048513 | 0.10236312 |
| FABP5     | fatty acid bir | 1.60695308 | 5.86E-05   | 0.00083388 | 28.4329538 | 26.6144109 |
| FABP6     | fatty acid bir | 1.76168769 | 0.01513621 | 0.06178919 | 2.08388104 | 2.10868025 |
| FABP7     | fatty acid bir | -2.2511771 | 0.00630172 | 0.03244429 | 1.84343323 | 2.39529698 |
| FAIM2     | Fas apoptoti   | -2.1573423 | 2.46E-05   | 0.00040963 | 11.7218309 | 10.5229286 |
| FAM101B   | family with s  | -1.8647698 | 8.22E-06   | 0.00016401 | 7.83459122 | 7.88196014 |
| FAM110A   | family with s  | -1.5202916 | 0.02538838 | 0.08949043 | 6.01119531 | 6.22367762 |
| FAM118B   | family with s  | 1.60622826 | 3.56E-05   | 0.00056006 | 15.2083241 | 15.5387214 |
| FAM126B   | family with s  | 1.5993764  | 0.0002875  | 0.0029776  | 7.91474049 | 8.02526851 |
| FAM131B   | family with s  | -1.7597491 | 0.00106736 | 0.00836228 | 14.947839  | 16.9922777 |

|            |                |            |            |            |            |            |
|------------|----------------|------------|------------|------------|------------|------------|
| FAM131C    | family with s  | -2.1762099 | 0.00030089 | 0.00308484 | 3.10578424 | 2.74333158 |
| FAM132B    | family with s  | -1.7823234 | 0.01643514 | 0.06540553 | 2.30429154 | 2.39529698 |
| FAM13B     | family with s  | 1.5473153  | 3.86E-05   | 0.0005979  | 30.7572827 | 33.4932124 |
| FAM155A    | family with s  | -1.7199494 | 0.00084424 | 0.00695448 | 7.19339705 | 7.90243277 |
| FAM155B    | family with s  | 1.68556644 | 0.0451059  | 0.13402922 | 1.48276151 | 0.81890495 |
| FAM161A    | family with s  | -1.5205053 | 0.00541693 | 0.02895728 | 8.21530026 | 10.3796202 |
| FAM167A    | family with s  | -1.5330227 | 0.00530127 | 0.02845514 | 7.09321047 | 7.06305519 |
| FAM171A1   | family with s  | -1.9529251 | 2.09E-09   | 1.47E-07   | 26.5694833 | 25.7955059 |
| FAM171A2   | family with s  | -1.8468708 | 0.00015585 | 0.00183965 | 8.0349644  | 7.61581603 |
| FAM172A    | family with s  | -1.5088494 | 0.00072133 | 0.0061371  | 24.8663113 | 26.8191371 |
| FAM180A    | family with s  | 2.82189697 | 0.0007009  | 0.00600995 | 0.46085831 | 0.83937757 |
| FAM189A2   | family with s  | 2.0602531  | 0.02462924 | 0.08739823 | 0.58108221 | 0.73701445 |
| FAM198B    | family with s  | 3.26283537 | 1.91E-20   | 1.19E-17   | 4.5284338  | 4.31972361 |
| FAM19A2    | family with s  | 4.112418   | 7.25E-05   | 0.0009874  | 0.20037318 | 0.36850723 |
| FAM200A    | family with s  | 1.58738871 | 7.93E-06   | 0.00015995 | 11.922204  | 10.4819834 |
| FAM20C     | family with s  | -2.899076  | 1.59E-17   | 5.97E-15   | 176.14806  | 173.505486 |
| FAM212B    | family with s  | 2.3974622  | 4.83E-18   | 1.97E-15   | 15.8895929 | 17.4631481 |
| FAM212B-AS | FAM212B an     | 2.09371372 | 0.03064613 | 0.10189874 | 0.86160466 | 0.49134297 |
| FAM222A    | family with s  | 1.58433513 | 0.00205987 | 0.01384024 | 6.93291192 | 6.32604074 |
| FAM225B    | family with s  | 1.89428341 | 0.01563946 | 0.06324574 | 4.70876966 | 1.67875515 |
| FAM227A    | family with s  | 1.61046132 | 0.01387664 | 0.05803841 | 2.16403031 | 2.21104336 |
| FAM27B     | family with s  | 2.79434916 | 8.15E-07   | 2.41E-05   | 5.30988919 | 3.29609242 |
| FAM64A     | family with s  | -1.5981278 | 0.00074195 | 0.00628251 | 22.0610868 | 21.4348371 |
| FAM65B     | family with s  | -1.7709473 | 0.01636973 | 0.06529106 | 2.78518716 | 3.7055449  |
| FAM69B     | family with s  | -1.5641305 | 0.00013662 | 0.0016584  | 15.2083241 | 16.0300644 |
| FAM72A     | family with s  | -1.5471874 | 0.00017005 | 0.00197822 | 23.0028407 | 25.897869  |
| FAM72B     | family with s  | -1.5867978 | 2.71E-05   | 0.00044392 | 20.1976162 | 20.841131  |
| FAM72D     | family with s  | -1.734728  | 0.00296607 | 0.01832226 | 19.9170938 | 14.7402891 |
| FAM83D     | family with s  | -1.5274623 | 1.35E-07   | 5.20E-06   | 59.851468  | 59.5343898 |
| FAM83H     | family with s  | 2.29713438 | 2.82E-10   | 2.56E-08   | 5.73067286 | 4.8315392  |
| FAM84A     | family with s  | 2.72289216 | 0.00538781 | 0.02884361 | 0.54100758 | 0.26614411 |
| FAM90A1    | family with s  | 1.80562326 | 0.02304403 | 0.08337153 | 1.2423137  | 1.22835742 |
| FANCD2     | Fanconi ane    | -1.7694995 | 1.61E-05   | 0.00029151 | 39.8742622 | 43.2791266 |
| FANCI      | Fanconi ane    | -1.651398  | 1.96E-09   | 1.41E-07   | 107.159575 | 111.555327 |
| FAR2       | fatty acyl Co  | -1.838906  | 1.15E-05   | 0.00021963 | 22.0410495 | 21.4348371 |
| FARP1      | FERM; RhoG     | -2.2500112 | 1.53E-08   | 8.04E-07   | 73.2363962 | 71.9817451 |
| FAS        | Fas cell surf  | 2.93336019 | 3.78E-20   | 2.15E-17   | 16.3504512 | 19.0600127 |
| FAXDC2     | fatty acid hyc | -1.5009739 | 0.00080353 | 0.00668093 | 17.4324664 | 16.0095918 |
| FBLIM1     | filamin bindi  | 1.52925445 | 0.01580169 | 0.06363094 | 3.30615742 | 3.72601752 |
| FBLN1      | fibulin 1      | -3.2628986 | 8.58E-08   | 3.55E-06   | 4.60858307 | 5.17957381 |
| FBXO22     | F-box proteir  | 1.74273686 | 8.06E-12   | 1.06E-09   | 47.9693386 | 45.6334783 |
| FBXO22-AS1 | FBXO22 anti    | 1.59722035 | 0.00201377 | 0.01358494 | 11.100674  | 12.8363351 |
| FBXO43     | F-box proteir  | -1.633659  | 0.01072157 | 0.04779267 | 4.78891893 | 4.34019623 |

|           |                |            |            |            |            |            |
|-----------|----------------|------------|------------|------------|------------|------------|
| FBXO5     | F-box proteir  | -1.8405104 | 2.58E-09   | 1.75E-07   | 25.2470203 | 25.6521976 |
| FBXW7     | F-box and W    | 1.7395139  | 4.30E-06   | 9.59E-05   | 13.7055253 | 12.1402659 |
| FCGR2A    | Fc fragment    | -1.7814744 | 0.00039911 | 0.00388239 | 5.91100872 | 6.79691108 |
| FCMR      | Fc fragment    | 2.0463212  | 0.00242601 | 0.01569366 | 1.08201516 | 1.39213841 |
| FDX1L     | ferredoxin 1-  | 1.80731904 | 4.47E-05   | 0.0006664  | 16.4506378 | 16.6647157 |
| FDXR      | ferredoxin re  | 3.26405682 | 2.73E-19   | 1.39E-16   | 25.9082518 | 24.5057306 |
| FGFR1     | fibroblast gr  | -1.89202   | 1.94E-09   | 1.40E-07   | 83.4153536 | 82.0747486 |
| FGFR3     | fibroblast gr  | -1.614623  | 0.00926096 | 0.04284997 | 8.73627052 | 9.3150438  |
| FGFRL1    | fibroblast gr  | -1.7826826 | 7.12E-05   | 0.00097138 | 150.29992  | 149.511571 |
| FHL1      | four and a ha  | -1.696579  | 1.99E-08   | 1.02E-06   | 30.4366856 | 31.8349299 |
| FHL2      | four and a ha  | 2.25259534 | 1.17E-09   | 8.98E-08   | 36.6883287 | 36.4412703 |
| FIBCD1    | fibrinogen C   | -2.6046148 | 0.00130301 | 0.00981524 | 3.12582156 | 3.35751029 |
| FKBP9P1   | FK506 bindin   | -1.880401  | 0.00328367 | 0.01979511 | 3.80709036 | 3.13231143 |
| FLJ26245  | NA             | -2.6868737 | 9.47E-06   | 0.00018572 | 3.44641864 | 3.91027114 |
| FLJ36000  | NA             | 1.88284007 | 0.02275892 | 0.0827586  | 0.70130612 | 1.10552168 |
| FLJ37201  | NA             | -1.9200704 | 0.01358389 | 0.05708758 | 1.9235825  | 1.76064564 |
| FMNL1     | formin-like 1  | -1.6061154 | 1.96E-06   | 4.98E-05   | 27.2707894 | 26.5939382 |
| FMNL3     | formin-like 3  | -1.6966092 | 0.0001766  | 0.00203022 | 56.8458703 | 58.2650872 |
| FN1       | fibronectin 1  | -2.9820218 | 4.32E-07   | 1.41E-05   | 766.467477 | 784.429051 |
| FNDC4     | fibronectin ty | -1.5414338 | 0.01032903 | 0.04655248 | 4.46832185 | 4.38114148 |
| FOLR1     | folate recept  | 2.14301047 | 0.02489858 | 0.08815643 | 0.36067172 | 0.8598502  |
| FOS       | FBJ murine c   | 2.74336587 | 0.00032016 | 0.00323364 | 3.88723963 | 3.33703767 |
| FOSB      | FBJ murine c   | 3.89899919 | 3.26E-12   | 4.70E-10   | 3.42638133 | 3.31656505 |
| FOXD2     | forkhead box   | -1.832217  | 0.00099218 | 0.00790801 | 7.53403146 | 8.1890495  |
| FOXD2-AS1 | FOXD2 antis    | -1.6131416 | 0.00399864 | 0.02291299 | 7.1332851  | 8.00479588 |
| FOXL1     | forkhead box   | -1.5045466 | 0.04244185 | 0.12863438 | 3.1658962  | 4.77012133 |
| FOXM1     | forkhead box   | -1.6520469 | 4.38E-08   | 1.97E-06   | 164.406192 | 170.536956 |
| FOXP1     | forkhead box   | -1.5532802 | 5.60E-06   | 0.0001197  | 28.4930658 | 28.8254542 |
| FREM1     | FRAS1 relate   | -2.9512122 | 0.0007802  | 0.00653272 | 1.56291078 | 2.27246124 |
| FREM2     | FRAS1 relate   | -2.3892681 | 1.88E-07   | 6.92E-06   | 35.506127  | 40.7200486 |
| FRG2      | FSHD region    | 8.33650932 | 0.00298661 | 0.01843319 | 0.12022391 | 0.10236312 |
| FRMD4A    | FERM domai     | -1.7840857 | 2.09E-10   | 1.94E-08   | 128.659617 | 132.130314 |
| FSCN1     | fascin actin-l | -1.5106336 | 4.11E-06   | 9.27E-05   | 486.866745 | 475.886139 |
| FSTL1     | folistatin-lik | -1.8623561 | 6.21E-09   | 3.77E-07   | 51.6361677 | 56.5044415 |
| FTH1      | ferritin; heav | 1.89880123 | 2.43E-05   | 0.00040565 | 2600.10246 | 2490.94508 |
| FTH1P3    | ferritin; heav | 2.0344804  | 0.04230536 | 0.12838452 | 1.12208979 | 0.98268594 |
| FUNDC2    | FUN14 dom      | 1.59475249 | 0.00018324 | 0.00208739 | 36.0872092 | 39.3074376 |
| FUT11     | fucosyltransf  | -1.6216232 | 9.18E-05   | 0.00119849 | 26.2488862 | 25.734088  |
| FXYD3     | FXYD domair    | -2.3258171 | 3.72E-06   | 8.47E-05   | 10.8602262 | 9.99064039 |
| FXYD6     | FXYD domair    | -3.4938389 | 3.54E-05   | 0.00055704 | 1.66309737 | 1.53544678 |
| FXYD7     | FXYD domair    | -3.6725015 | 4.47E-06   | 9.90E-05   | 2.9454857  | 3.09136619 |
| FZD1      | frizzled class | -2.6758079 | 3.44E-12   | 4.91E-10   | 76.6026656 | 73.4762466 |
| FZD2      | frizzled class | -1.7779248 | 1.28E-08   | 6.86E-07   | 45.34445   | 42.4806943 |

|          |               |            |            |            |            |            |
|----------|---------------|------------|------------|------------|------------|------------|
| GABRE    | gamma-ami     | -1.6750985 | 0.00318613 | 0.01939184 | 5.57037432 | 5.15910118 |
| GADD45A  | growth arres  | 5.25715232 | 9.37E-13   | 1.47E-10   | 36.1473211 | 32.0601288 |
| GADD45B  | growth arres  | 2.33181164 | 0.00029029 | 0.00299829 | 9.57783786 | 9.45835217 |
| GAL      | galanin/GM    | 1.61656231 | 0.02561197 | 0.0900558  | 1.74324664 | 1.82206351 |
| GAL3ST4  | galactose-3-  | 1.65760198 | 0.01126786 | 0.04976088 | 2.42451544 | 3.11183881 |
| GALNT12  | polypeptide I | 2.03837327 | 6.27E-06   | 0.00013143 | 2.78518716 | 2.96853044 |
| GAN      | gigaxonin     | 1.77179336 | 0.00083377 | 0.0068842  | 3.60671719 | 3.29609242 |
| GAP43    | growth assoc  | 2.25782244 | 1.21E-05   | 0.00022884 | 2.92544838 | 2.96853044 |
| GAREM    | GRB2 associ   | 1.79576476 | 4.19E-05   | 0.00063507 | 3.86720232 | 4.52444985 |
| GAREML   | GRB2 associ   | -1.7739377 | 0.00018603 | 0.00211579 | 8.55593466 | 7.45203504 |
| GAS6-AS1 | GAS6 antiser  | 2.81795992 | 1.94E-10   | 1.82E-08   | 2.48462739 | 1.78111827 |
| GAS6-AS2 | GAS6 antiser  | 3.02332645 | 0.00047803 | 0.00448483 | 0.58108221 | 0.61417871 |
| GAST     | gastrin       | 10.1125699 | 1.26E-05   | 0.00023703 | 0.04007464 | 0.12283574 |
| GATA3    | GATA bindin   | -1.6693577 | 0.00024939 | 0.00267831 | 10.9804501 | 9.47882479 |
| GATSL3   | GATS proteir  | -2.1409582 | 0.0017538  | 0.01228778 | 3.68686646 | 3.31656505 |
| GBA      | glucosidase;  | 1.50904966 | 2.27E-07   | 8.00E-06   | 67.0248277 | 70.2620447 |
| GBAP1    | glucosidase;  | 1.60038034 | 0.03226971 | 0.10566995 | 1.62302273 | 1.82206351 |
| GBP1     | guanylate bi  | -2.0235384 | 0.00013717 | 0.00166371 | 11.4613457 | 10.5638739 |
| GBP2     | guanylate bi  | -1.7930467 | 0.00024618 | 0.00264776 | 19.235825  | 18.2615804 |
| GCLM     | glutamate-cy  | 1.62314764 | 2.76E-06   | 6.60E-05   | 42.258703  | 40.6586308 |
| GDA      | guanine dea   | 1.5526025  | 4.79E-06   | 0.00010499 | 92.3519973 | 94.2150145 |
| GDF15    | growth diffe  | 5.46140143 | 4.67E-18   | 1.96E-15   | 10.0386962 | 10.2567845 |
| GDPGP1   | GDP-D-gluc    | 1.79525167 | 0.00285354 | 0.01778903 | 2.16403031 | 2.53860534 |
| GEM      | GTP binding   | 1.90206654 | 7.19E-06   | 0.00014745 | 12.0624653 | 11.587505  |
| GFPT2    | glutamine-fr  | -1.5134481 | 6.82E-05   | 0.00093935 | 129.861856 | 124.391662 |
| GFRA1    | GDNF family   | 2.27081988 | 0.03676038 | 0.11613218 | 0.28052245 | 0.96221332 |
| GGT1     | gamma-glut    | 2.5860991  | 5.45E-05   | 0.00078389 | 1.2423137  | 1.04410381 |
| GIN51    | GIN comple    | -1.5094834 | 1.43E-05   | 0.00026237 | 35.5261643 | 35.9703999 |
| GIN52    | GIN comple    | -1.7239715 | 1.67E-06   | 4.35E-05   | 27.1305282 | 27.0648086 |
| GJA3     | gap junction  | 1.54763786 | 7.91E-05   | 0.00106267 | 9.07690492 | 8.51661148 |
| GJA5     | gap junction  | -3.9420657 | 1.20E-08   | 6.55E-07   | 35.8467614 | 39.286965  |
| GJB3     | gap junction  | 1.69799823 | 2.64E-07   | 9.19E-06   | 29.1943719 | 31.6506763 |
| GJC2     | gap junction  | -1.7455071 | 0.00264197 | 0.01677836 | 23.8844827 | 21.7009812 |
| GLDN     | gliomedin     | -2.9102979 | 0.00399599 | 0.02291299 | 1.38257492 | 1.35119317 |
| GLI3     | GLI family zi | -1.5765072 | 0.00731705 | 0.03624443 | 47.3081071 | 44.3027578 |
| GLIS2    | GLIS family z | -1.6110701 | 4.34E-06   | 9.66E-05   | 40.9162027 | 41.1704463 |
| GLIS3    | GLIS family z | -2.0711973 | 1.78E-07   | 6.62E-06   | 86.6413617 | 87.3771581 |
| GLRX2    | glutaredoxin  | 1.61414051 | 0.00053865 | 0.00492698 | 18.4343323 | 19.1828484 |
| GLS2     | glutaminase   | 4.23685774 | 0.0026688  | 0.01691108 | 0.24044781 | 0.40945247 |
| GM2A     | GM2 ganglio   | 1.51897703 | 4.88E-06   | 0.00010659 | 36.8887019 | 35.9703999 |
| GMPR     | guanosine m   | 2.59998296 | 0.04107022 | 0.12567997 | 0.20037318 | 0.30708936 |
| GNAL     | guanine nucl  | -1.5171287 | 0.04124301 | 0.12599232 | 4.60858307 | 4.27877836 |
| GNAO1    | guanine nucl  | -1.5218955 | 0.00011425 | 0.00142953 | 14.2264956 | 14.2284735 |

|           |               |            |            |            |            |            |
|-----------|---------------|------------|------------|------------|------------|------------|
| GNAS      | GNAS compl    | -1.5378998 | 9.69E-06   | 0.00018831 | 1280.64509 | 1269.93732 |
| GNG4      | guanine nucl  | -2.2077755 | 7.57E-09   | 4.38E-07   | 69.2890446 | 74.7660219 |
| GNG7      | guanine nucl  | -1.5175575 | 0.03032923 | 0.10115753 | 2.96552302 | 2.68191371 |
| GOLGA6L5P | golgin A6 far | -3.3000931 | 0.00905177 | 0.0423331  | 1.0219032  | 1.31024792 |
| GOLT1A    | golgi transpc | 1.64733016 | 0.02533732 | 0.08935464 | 3.04567229 | 2.37482435 |
| GPATCH4   | G patch dom   | 1.57799686 | 7.20E-06   | 0.00014745 | 113.030509 | 102.076502 |
| GPC1      | glypican 1    | 1.59330005 | 3.37E-06   | 7.81E-05   | 41.817882  | 39.4712186 |
| GPD1      | glycerol-3-ph | 2.38927548 | 0.01323154 | 0.0560198  | 0.38070904 | 0.63465134 |
| GPR135    | G protein-coi | -1.6088988 | 0.0228402  | 0.08292912 | 3.04567229 | 2.68191371 |
| GPR146    | G protein-coi | -2.6870671 | 0.00053189 | 0.00488715 | 4.44828453 | 3.64412703 |
| GPR153    | G protein-coi | -2.0336018 | 1.42E-06   | 3.78E-05   | 117.859503 | 122.528653 |
| GPR160    | G protein-coi | -1.6655952 | 0.01051719 | 0.04719158 | 4.00746354 | 4.09452475 |
| GPR161    | G protein-coi | -1.5442684 | 0.00011169 | 0.00140862 | 49.4521001 | 46.9232536 |
| GPR179    | G protein-coi | 2.220756   | 0.00864882 | 0.04092107 | 0.62115685 | 0.45039772 |
| GPR25     | G protein-coi | -4.0071434 | 0.00347236 | 0.02057572 | 1.2423137  | 1.2078848  |
| GPR39     | G protein-coi | -1.6583268 | 0.00028643 | 0.00296871 | 8.91660638 | 8.63944722 |
| GPR85     | G protein-coi | 2.61952432 | 4.89E-07   | 1.58E-05   | 1.54287346 | 1.65828252 |
| GPR87     | G protein-coi | 22.411408  | 1.40E-08   | 7.42E-07   | 0.10018659 | 0.06141787 |
| GPRC5A    | G protein-coi | 1.65964695 | 1.90E-09   | 1.38E-07   | 357.966681 | 379.030156 |
| GPRC5B    | G protein-coi | -1.8825745 | 2.01E-05   | 0.00034788 | 7.93477781 | 8.43472098 |
| GPRC5D    | G protein-coi | 2.14023903 | 0.02910391 | 0.09851062 | 0.48089562 | 0.38897985 |
| GPS2      | G protein pai | 1.50353576 | 0.00018718 | 0.00212448 | 76.5826283 | 72.9030132 |
| GPSM2     | G-protein sig | -1.9365013 | 4.27E-08   | 1.95E-06   | 31.7391112 | 33.247541  |
| GPX1      | glutathione p | 1.64814563 | 8.58E-05   | 0.00113154 | 222.915159 | 215.43342  |
| GPX3      | glutathione p | 1.72367313 | 2.01E-05   | 0.00034811 | 10.1388828 | 10.9528537 |
| GRAMD1C   | GRAM doma     | -1.5122836 | 0.03518234 | 0.11274645 | 3.98742622 | 3.1937293  |
| GREB1     | growth regul  | 2.43157864 | 2.68E-05   | 0.00043934 | 2.78518716 | 3.00947569 |
| GRHL3     | grainyhead-li | 3.78630771 | 3.06E-06   | 7.18E-05   | 0.9016793  | 0.51181559 |
| GRID2     | glutamate re  | -2.4384734 | 1.53E-05   | 0.00027868 | 4.42824721 | 4.03310688 |
| GRIN2C    | glutamate re  | 3.43375849 | 0.00037074 | 0.00364369 | 0.36067172 | 0.36850723 |
| GRK6      | G protein-coi | -1.6341472 | 2.16E-09   | 1.49E-07   | 45.7652336 | 43.9342506 |
| GSG2      | germ cell as  | -1.5603338 | 0.00557139 | 0.029494   | 11.5615323 | 12.6725541 |
| GSTT2B    | glutathione S | 2.07769879 | 0.03208774 | 0.10538889 | 1.38257492 | 1.37166579 |
| GTSE1     | G-2 and S-ph  | -1.5966652 | 0.00076896 | 0.00645375 | 35.6664255 | 35.6633106 |
| GUSBP1    | glucuronidas  | 1.50257548 | 0.01311811 | 0.0556719  | 5.45015041 | 5.6913894  |
| GXYLT2    | glucoside xyl | -1.5469821 | 0.01848175 | 0.07120394 | 11.3010472 | 11.423724  |
| GYLTL1B   | glycosyltrans | -2.1493966 | 0.03546877 | 0.11335179 | 1.34250029 | 1.24883005 |
| H19       | H19; imprint  | -4.6089713 | 1.86E-09   | 1.36E-07   | 5.28985187 | 3.66459965 |
| H1FX-AS1  | H1FX antiser  | -1.9707407 | 0.00913483 | 0.04258437 | 2.38444081 | 2.23151599 |
| HAP1      | huntingtin-as | 2.50004867 | 0.00549626 | 0.02928121 | 0.86160466 | 0.53228822 |
| HAPLN1    | hyaluronan a  | -2.7902019 | 2.69E-07   | 9.33E-06   | 30.3164617 | 32.592417  |
| HAPLN3    | hyaluronan a  | -1.8941445 | 3.06E-06   | 7.18E-05   | 12.2027265 | 13.3072054 |
| HAS2      | hyaluronan s  | -2.1242908 | 0.00122959 | 0.00939059 | 15.1482122 | 16.0095918 |



|            |               |            |            |            |            |            |
|------------|---------------|------------|------------|------------|------------|------------|
| HBEGF      | heparin-bind  | 1.90460746 | 1.35E-05   | 0.00025077 | 11.922204  | 11.5260872 |
| HCN1       | hyperpolariza | -4.8951422 | 0.0002263  | 0.0024675  | 4.76888161 | 5.28193693 |
| HCP5       | HLA complex   | 1.55957536 | 0.00519922 | 0.02806592 | 2.86533643 | 4.23783311 |
| HDAC9      | histone deac  | 1.89134092 | 0.00090114 | 0.0073594  | 10.0186589 | 11.1371073 |
| HECW1      | HECT; C2 anc  | 2.88003593 | 0.00018192 | 0.00207571 | 0.76141807 | 1.24883005 |
| HEG1       | heart develop | -1.9266772 | 1.73E-05   | 0.00030757 | 126.876296 | 140.196527 |
| HERC3      | HECT and RL   | -1.6565064 | 0.00061086 | 0.00544426 | 25.1267964 | 24.0962781 |
| HES6       | hes family bl | 1.67109999 | 0.00447545 | 0.02500182 | 3.48649328 | 2.9275852  |
| HEY1       | hes-related f | -1.8085111 | 0.00115671 | 0.00891521 | 5.39003846 | 5.28193693 |
| HEY2       | hes-related f | -2.6693906 | 0.00648905 | 0.03314345 | 0.76141807 | 1.5559194  |
| HHAT       | hedgehog ac   | 1.82378493 | 2.83E-07   | 9.80E-06   | 11.6016069 | 12.3245195 |
| HHEX       | hematopoiet   | -1.639839  | 3.28E-07   | 1.11E-05   | 30.4767602 | 30.0947569 |
| HIBADH     | 3-hydroxyiso  | -1.5513577 | 1.26E-06   | 3.43E-05   | 60.7731846 | 59.309191  |
| HIC1       | hypermethyl   | 3.77126101 | 0.00029984 | 0.00308206 | 0.28052245 | 0.71654183 |
| HID1       | HID1 domain   | -1.5671345 | 0.00644385 | 0.03296935 | 6.15145653 | 6.81738371 |
| HILPDA     | hypoxia indu  | -2.829223  | 1.99E-25   | 2.36E-22   | 29.6752675 | 31.5892584 |
| HIP1       | huntingtin in | -1.5623186 | 0.0005628  | 0.00509885 | 82.0327787 | 87.9913369 |
| HIST1H1C   | histone clust | 4.25865624 | 3.08E-11   | 3.68E-09   | 16.0498915 | 15.3749404 |
| HIST1H1E   | histone clust | 3.89313718 | 0.00819908 | 0.03958169 | 0.24044781 | 0.14330837 |
| HIST1H2AC  | histone clust | 3.03768523 | 2.86E-12   | 4.16E-10   | 3.94735159 | 3.91027114 |
| HIST1H2AE  | histone clust | 3.13999979 | 0.00139639 | 0.01036995 | 0.58108221 | 0.26614411 |
| HIST1H2BD  | histone clust | 3.51838529 | 8.51E-15   | 2.17E-12   | 10.4594798 | 8.6189746  |
| HIST1H2BG  | histone clust | 7.41600658 | 1.18E-07   | 4.66E-06   | 0.50093294 | 0.32756198 |
| HIST1H2BK  | histone clust | 3.7930876  | 1.17E-17   | 4.50E-15   | 17.8532501 | 15.3954131 |
| HIST1H3D   | histone clust | 5.39711228 | 8.79E-08   | 3.62E-06   | 0.6812688  | 0.40945247 |
| HIST1H3H   | histone clust | 3.89264959 | 4.59E-05   | 0.00067967 | 0.42078367 | 0.3480346  |
| HIST1H4H   | histone clust | 6.58483286 | 9.83E-06   | 0.00019087 | 0.42078367 | 0.16378099 |
| HIST1H4K   | histone clust | 2.29022983 | 0.02968054 | 0.09975883 | 1.22227638 | 0.69606921 |
| HIST2H2AA3 | histone clust | 3.92252138 | 1.69E-15   | 4.54E-13   | 10.0386962 | 9.68355103 |
| HIST2H2AA4 | histone clust | 3.92252131 | 1.68E-15   | 4.54E-13   | 10.0386962 | 9.68355103 |
| HIST2H2BC  | histone clust | 2.10756181 | 2.02E-06   | 5.12E-05   | 4.26794867 | 3.39845554 |
| HIST2H2BE  | histone clust | 4.05826689 | 4.42E-25   | 4.50E-22   | 4.78891893 | 5.28193693 |
| HIST2H2BF  | histone clust | 2.65121368 | 0.0001183  | 0.00147328 | 0.92171661 | 1.24883005 |
| HIST2H3A   | histone clust | 3.20576492 | 8.18E-06   | 0.00016401 | 0.82153003 | 0.96221332 |
| HIST2H3C   | histone clust | 3.20576446 | 8.19E-06   | 0.00016401 | 0.82153003 | 0.96221332 |
| HIST2H4A   | histone clust | 2.51188769 | 1.88E-07   | 6.92E-06   | 3.70690377 | 3.7055449  |
| HIST2H4B   | histone clust | 2.51188769 | 1.88E-07   | 6.92E-06   | 3.70690377 | 3.7055449  |
| HIST3H2A   | histone clust | 1.81127214 | 0.00141361 | 0.01045426 | 5.02936674 | 4.62681297 |
| HIVEP3     | human immu    | -2.3738806 | 3.99E-08   | 1.83E-06   | 72.3547542 | 76.3833592 |
| HJURP      | Holliday junc | -1.6564393 | 3.50E-07   | 1.17E-05   | 47.1878832 | 46.5342738 |
| HKDC1      | hexokinase d  | -3.8111003 | 3.27E-05   | 0.00051817 | 4.64865771 | 5.01579282 |
| HLA-DMB    | major histoci | 2.40303927 | 1.12E-11   | 1.45E-09   | 4.5284338  | 4.97484757 |
| HLA-DOA    | major histoci | 2.62407503 | 3.21E-06   | 7.48E-05   | 1.80335859 | 1.92442663 |

|           |                |            |            |            |            |            |
|-----------|----------------|------------|------------|------------|------------|------------|
| HLA-DQA1  | major histoc   | 2.23277859 | 0.00700583 | 0.03501931 | 0.62115685 | 0.96221332 |
| HLA-DQB1  | major histoc   | 1.64598036 | 0.0010999  | 0.00853737 | 3.76701573 | 3.80790802 |
| HLA-DQB2  | major histoc   | 1.80643192 | 0.00779406 | 0.0381826  | 2.78518716 | 2.04726237 |
| HLA-DRA   | major histoc   | 1.53860207 | 2.15E-06   | 5.37E-05   | 71.2126271 | 73.4148287 |
| HLA-DRB1  | major histoc   | 1.56562229 | 0.00020583 | 0.00229883 | 14.2064582 | 12.3654647 |
| HLA-DRB5  | major histoc   | 1.55753183 | 0.00229757 | 0.01506702 | 5.75071018 | 7.28825405 |
| HLA-DRB6  | major histoc   | 1.5875607  | 0.00396393 | 0.02279244 | 4.36813526 | 4.4835046  |
| HMCN1     | hemocentin 1   | -2.9995249 | 1.43E-15   | 4.08E-13   | 28.1323941 | 30.4837368 |
| HMGB2     | high mobility  | -2.0766447 | 9.41E-13   | 1.47E-10   | 144.168501 | 141.281576 |
| HMHA1     | histocompati   | -1.6079796 | 0.00094982 | 0.00764455 | 13.184555  | 13.2457876 |
| HMMR      | hyaluronan-r   | -1.8066081 | 0.00014478 | 0.00173965 | 70.511321  | 68.3376181 |
| HMOX1     | heme oxygen    | 6.61764692 | 3.26E-09   | 2.15E-07   | 7.91474049 | 7.77959702 |
| HMOX2     | heme oxygen    | 1.59086713 | 0.00031968 | 0.00323103 | 57.0662808 | 51.8366833 |
| HOXA13    | homeobox A     | -3.6430493 | 0.00146624 | 0.01070075 | 2.58481398 | 2.08820762 |
| HOXB5     | homeobox B     | -1.8510915 | 0.00061299 | 0.00544974 | 11.7418682 | 11.4851419 |
| HOXB8     | homeobox B     | -1.7557507 | 2.42E-06   | 5.87E-05   | 22.5620197 | 24.7309295 |
| HOXB9     | homeobox B     | -1.5422692 | 0.00026619 | 0.00280584 | 11.7619055 | 12.3449921 |
| HPGD      | hydroxyprost   | 2.3864428  | 0.02977982 | 0.09992752 | 0.48089562 | 0.22519886 |
| HPN-AS1   | HPN antisens   | -2.3055227 | 8.54E-05   | 0.00112959 | 2.90541107 | 3.54176391 |
| HRAS      | Harvey rat sa  | 1.67705045 | 0.00013895 | 0.00168235 | 37.4497468 | 35.2333855 |
| HS3ST1    | heparan sulf   | -1.5378274 | 0.00827135 | 0.03976804 | 7.79451659 | 8.00479588 |
| HS3ST3A1  | heparan sulf   | -1.6539357 | 7.11E-05   | 0.00097138 | 31.6789993 | 31.937293  |
| HSD17B11  | hydroxystero   | -1.5960517 | 1.52E-05   | 0.00027751 | 39.9544115 | 40.1672878 |
| HSD17B7P2 | hydroxystero   | 4.11646202 | 0.00060859 | 0.00542746 | 0.14026122 | 0.24567148 |
| HSPA4L    | heat shock 7   | 1.73553538 | 2.35E-06   | 5.76E-05   | 10.9804501 | 12.5292457 |
| HSPB8     | heat shock 2   | 2.17257463 | 3.81E-08   | 1.76E-06   | 11.2810099 | 10.7481275 |
| HSPBAP1   | HSPB (heat s   | 1.50078316 | 0.002302   | 0.01507589 | 6.83272534 | 6.18273237 |
| HTR1D     | 5-hydroxytry   | -2.0529477 | 0.03337314 | 0.10836197 | 1.64306005 | 1.12599431 |
| HYPK      | huntingtin in  | 1.9082786  | 1.19E-06   | 3.29E-05   | 109.243456 | 94.6244669 |
| ICAM1     | intercellular  | -1.901917  | 5.13E-19   | 2.44E-16   | 154.607943 | 158.437635 |
| ICAM4     | intercellular  | -1.6422387 | 0.02871026 | 0.09753571 | 2.46459008 | 2.74333158 |
| ICAM5     | intercellular  | -2.0110727 | 3.96E-07   | 1.31E-05   | 31.7791859 | 29.869558  |
| ICOSLG    | inducible T-c  | -1.7342286 | 0.0068167  | 0.03437538 | 3.10578424 | 2.80474945 |
| ID2       | inhibitor of C | 6.42377062 | 4.87E-13   | 8.07E-11   | 1.5829481  | 1.24883005 |
| ID3       | inhibitor of C | 1.71929542 | 7.46E-07   | 2.23E-05   | 46.7470622 | 45.5925331 |
| IDH2      | isocitrate del | -1.5505907 | 0.00192821 | 0.01317948 | 18.1137352 | 16.3371537 |
| IER5      | immediate e    | 1.69948611 | 2.90E-08   | 1.41E-06   | 78.1255017 | 81.1330079 |
| IFI27L2   | interferon; al | 1.59636027 | 0.00287216 | 0.01788168 | 12.2428011 | 11.751286  |
| IFI44L    | interferon-in  | -3.4051916 | 0.00011191 | 0.00140881 | 2.38444081 | 1.67875515 |
| IFITM1    | interferon in  | -3.9846498 | 5.20E-08   | 2.29E-06   | 3.18593351 | 2.12915287 |
| IFNGR2    | interferon ga  | -1.5989989 | 3.04E-08   | 1.45E-06   | 66.7242679 | 69.2384135 |
| IFT140    | intraflagellar | -1.5708535 | 4.35E-05   | 0.00065633 | 47.8491147 | 48.2539742 |
| IFT80     | intraflagellar | -1.5341662 | 0.00053334 | 0.00489734 | 41.1766879 | 41.7641524 |

|         |                 |            |            |            |            |            |
|---------|-----------------|------------|------------|------------|------------|------------|
| IGF2BP3 | insulin-like g  | -1.6632799 | 0.00035829 | 0.0035434  | 268.279647 | 264.301573 |
| IGFBP3  | insulin-like g  | -2.7908989 | 2.73E-08   | 1.35E-06   | 376.982095 | 376.675804 |
| IGFBP5  | insulin-like g  | -3.2821495 | 0.00082917 | 0.00685416 | 358.808248 | 368.159193 |
| IGFBP7  | insulin-like g  | -1.8722064 | 1.74E-07   | 6.52E-06   | 65.3016184 | 62.4824477 |
| IGFN1   | immunoglob      | 1.83014498 | 0.0001217  | 0.00150295 | 5.91100872 | 5.13862856 |
| IL11    | interleukin 1   | 2.10832977 | 9.35E-09   | 5.24E-07   | 28.4329538 | 31.8554025 |
| IL12A   | interleukin 1   | 1.59150163 | 0.03921043 | 0.1216078  | 1.86347055 | 1.94489926 |
| IL12RB1 | interleukin 1   | -1.5697605 | 0.04415463 | 0.13194542 | 2.28425422 | 2.067735   |
| IL16    | interleukin 1   | 2.23811614 | 0.03555552 | 0.11348301 | 0.40074635 | 0.30708936 |
| IL17RD  | interleukin 1   | -4.5726746 | 1.55E-14   | 3.50E-12   | 58.3286318 | 60.2099864 |
| IL18    | interleukin 1   | -1.5533665 | 0.00318684 | 0.01939184 | 8.09507635 | 8.90559133 |
| IL18R1  | interleukin 1   | -1.8624004 | 2.43E-08   | 1.21E-06   | 22.4618331 | 20.8616036 |
| IL1RL1  | interleukin 1   | 1.7266223  | 1.77E-06   | 4.57E-05   | 33.9832908 | 34.33259   |
| IL22RA1 | interleukin 2   | -1.8250918 | 0.00109844 | 0.00853071 | 3.86720232 | 3.31656505 |
| IL23A   | interleukin 2   | 3.6515234  | 0.00145955 | 0.01067962 | 0.22041049 | 0.24567148 |
| IL24    | interleukin 2   | 13.0573613 | 1.18E-14   | 2.96E-12   | 15.9296676 | 16.2347906 |
| ILDR2   | immunoglob      | 2.52954269 | 0.00083173 | 0.00687129 | 0.72134344 | 0.45039772 |
| ILVBL   | ilvB (bacteria  | -1.5833721 | 1.33E-07   | 5.15E-06   | 81.4116218 | 80.6007197 |
| IMPA2   | inositol(myo    | -1.5980874 | 2.32E-05   | 0.00039222 | 29.1943719 | 30.5656272 |
| INPP5D  | inositol poly   | 2.2620325  | 4.38E-09   | 2.75E-07   | 4.60858307 | 4.81106658 |
| INPP5J  | inositol poly   | 1.89217844 | 0.00131415 | 0.00987534 | 1.84343323 | 2.74333158 |
| IPO5    | importin 5      | -1.5086967 | 1.96E-05   | 0.00034264 | 376.401013 | 385.356197 |
| IQCG    | IQ motif con    | 1.51105137 | 0.01252797 | 0.0538408  | 4.04753818 | 3.58270916 |
| IQGAP2  | IQ motif con    | -3.0709705 | 1.65E-09   | 1.24E-07   | 7.31362096 | 5.99847876 |
| IQGAP3  | IQ motif con    | -1.8227902 | 0.00014093 | 0.00170045 | 100.54726  | 100.602473 |
| IQSEC1  | IQ motif and    | -1.5872698 | 0.00021119 | 0.00234402 | 51.0751228 | 55.7060092 |
| IRAK2   | interleukin-1   | -1.5412899 | 4.55E-05   | 0.00067634 | 16.7511976 | 17.3198397 |
| IRF2BPL | interferon re   | -1.7294986 | 3.89E-07   | 1.29E-05   | 113.070584 | 112.98841  |
| IRF5    | interferon re   | 1.55116814 | 0.03395839 | 0.10978698 | 2.2642169  | 1.43308366 |
| ISCU    | iron-sulfur cl  | 1.73458584 | 2.13E-08   | 1.08E-06   | 53.4395263 | 48.151611  |
| ISLR    | immunoglob      | -2.5298413 | 0.000979   | 0.00782927 | 12.0424279 | 12.9386982 |
| ISPD    | isoprenoid sy   | 1.6207066  | 0.03245854 | 0.10611761 | 1.46272419 | 1.71970039 |
| ITGA1   | integrin; alpb  | -1.7152643 | 0.00936572 | 0.04325043 | 363.416831 | 380.504185 |
| ITGA10  | integrin; alpb  | -3.5345483 | 1.38E-14   | 3.25E-12   | 11.5815696 | 10.2772571 |
| ITGA4   | integrin; alpb  | -1.6899424 | 0.00019498 | 0.00220007 | 55.4232208 | 58.2036693 |
| ITGA5   | integrin; alpb  | -1.6282075 | 4.98E-09   | 3.10E-07   | 358.828285 | 368.118248 |
| ITGA6   | integrin; alpb  | -2.0269148 | 2.32E-05   | 0.00039227 | 558.92094  | 585.68082  |
| ITGA9   | integrin; alpb  | -15.545851 | 1.70E-20   | 1.10E-17   | 3.58667987 | 3.21420193 |
| ITGAX   | integrin; alpb  | 1.82194804 | 0.01036068 | 0.04662144 | 1.18220174 | 1.51497416 |
| ITGB3   | integrin; betab | -3.0498763 | 2.91E-13   | 5.05E-11   | 198.149035 | 208.001857 |
| ITGB4   | integrin; betab | -2.6812146 | 3.83E-05   | 0.00059519 | 1062.9797  | 1072.19225 |
| ITGB5   | integrin; betab | -1.7834665 | 2.84E-07   | 9.84E-06   | 356.363695 | 349.303906 |
| ITGB7   | integrin; betab | 1.90460177 | 4.37E-05   | 0.00065802 | 7.37373291 | 6.44887648 |

|          |                |            |            |            |            |            |
|----------|----------------|------------|------------|------------|------------|------------|
| ITPKA    | inositol-trisp | -2.4918168 | 0.03882538 | 0.12083436 | 2.18406763 | 2.76380421 |
| ITPKC    | inositol-trisp | 1.51327227 | 0.00051797 | 0.00478396 | 16.5107498 | 17.9954363 |
| ITPRIPL1 | inositol 1;4;5 | -1.5553686 | 0.00785061 | 0.03835414 | 8.65612125 | 9.19220806 |
| JAM2     | junctional ad  | -1.8805421 | 0.00666186 | 0.03384603 | 2.74511252 | 3.05042094 |
| JOSD2    | Josephin don   | 1.52079608 | 0.0033338  | 0.02002949 | 26.0685503 | 26.2459036 |
| JUN      | jun proto-onc  | 1.86015623 | 0.00057337 | 0.00517816 | 38.7922471 | 35.3971665 |
| KANK1    | KN motif anc   | -1.503402  | 0.00040565 | 0.00393091 | 51.9768021 | 52.1233001 |
| KANK2    | KN motif anc   | -1.7083013 | 5.85E-05   | 0.00083336 | 159.917833 | 156.738407 |
| KANK3    | KN motif anc   | 2.47823912 | 0.00277662 | 0.01740857 | 0.70130612 | 1.67875515 |
| KBTBD8   | kelch repeat   | 1.97045377 | 0.00019394 | 0.00219178 | 3.82712768 | 4.74964871 |
| KCCAT211 | NA             | -5.033805  | 0.00021075 | 0.00234087 | 2.38444081 | 2.45671485 |
| KCND1    | potassium ch   | -2.1396292 | 2.25E-06   | 5.53E-05   | 15.2083241 | 15.8458108 |
| KCNF1    | potassium ch   | 3.17704144 | 0.00269795 | 0.01705031 | 0.22041049 | 0.40945247 |
| KCNH3    | potassium ch   | -2.3439977 | 5.19E-05   | 0.00075249 | 5.28985187 | 4.77012133 |
| KCNH8    | potassium ch   | 2.21675914 | 0.00022198 | 0.00243337 | 1.42264956 | 1.45355629 |
| KCNIP3   | Kv channel ir  | -1.6953697 | 0.00325389 | 0.01968215 | 4.44828453 | 3.76696277 |
| KCNJ2    | potassium ch   | -2.2890628 | 8.04E-09   | 4.58E-07   | 9.91847226 | 10.9528537 |
| KCNK5    | potassium ch   | -2.0881246 | 1.78E-09   | 1.32E-07   | 13.6053387 | 12.9796435 |
| KCNMA1   | potassium ch   | -1.5355168 | 0.00122402 | 0.00936316 | 26.8900804 | 29.7262497 |
| KCNN3    | potassium ch   | -1.6175292 | 0.00636087 | 0.03269158 | 5.39003846 | 5.56855366 |
| KDEL2    | KDEL (Lys-As   | -1.6321103 | 6.76E-05   | 0.00093279 | 45.5848978 | 47.2508156 |
| KDR      | kinase insert  | 4.35517224 | 1.07E-08   | 5.88E-07   | 1.98369445 | 1.84253614 |
| KHDRBS3  | KH domain c    | 1.80286585 | 8.26E-07   | 2.43E-05   | 12.6235102 | 12.3449921 |
| KHK      | ketohexokina   | 1.64546073 | 2.47E-05   | 0.00041027 | 7.03309851 | 7.22683618 |
| KIAA0101 | KIAA0101       | -1.8473021 | 3.83E-10   | 3.32E-08   | 77.3640836 | 82.0338033 |
| KIAA1024 | KIAA1024       | 1.51183948 | 0.03820291 | 0.11934012 | 2.92544838 | 3.00947569 |
| KIAA1324 | KIAA1324       | 4.57514106 | 1.08E-08   | 5.94E-07   | 0.92171661 | 0.96221332 |
| KIAA1467 | NA             | -1.5936157 | 0.00010072 | 0.0012943  | 17.7330262 | 17.6064564 |
| KIAA1522 | KIAA1522       | -1.7716291 | 7.83E-07   | 2.33E-05   | 66.1832604 | 69.9549553 |
| KIAA1755 | KIAA1755       | -6.7168935 | 3.49E-23   | 3.31E-20   | 29.95579   | 29.0097078 |
| KIF11    | kinesin famil  | -1.8423458 | 8.40E-08   | 3.49E-06   | 147.23421  | 152.009231 |
| KIF14    | kinesin famil  | -1.6946316 | 0.00464845 | 0.02567639 | 73.6371425 | 77.9392786 |
| KIF15    | kinesin famil  | -2.0481766 | 4.59E-06   | 0.00010149 | 39.9944861 | 41.1499737 |
| KIF18B   | kinesin famil  | -1.5278595 | 0.00045775 | 0.00433166 | 34.6645596 | 34.0459733 |
| KIF20A   | kinesin famil  | -1.7129839 | 0.00039768 | 0.00387117 | 92.3920719 | 100.02924  |
| KIF21B   | kinesin famil  | -2.0762776 | 1.67E-08   | 8.72E-07   | 44.903629  | 49.9941472 |
| KIF22    | kinesin famil  | -1.5435698 | 1.58E-05   | 0.00028599 | 78.0453524 | 75.195947  |
| KIF2C    | kinesin famil  | -1.6941574 | 5.51E-07   | 1.71E-05   | 97.9424089 | 103.345805 |
| KIF4A    | kinesin famil  | -1.7014708 | 1.01E-06   | 2.85E-05   | 75.7811355 | 84.6747718 |
| KIFC1    | kinesin famil  | -1.560475  | 0.00015452 | 0.00183201 | 46.2260919 | 44.5689019 |
| KIRREL   | kin of IRRE li | -1.91231   | 1.74E-07   | 6.52E-06   | 254.093226 | 265.857492 |
| KITLG    | KIT ligand     | 3.66757477 | 2.79E-08   | 1.37E-06   | 2.62488862 | 2.53860534 |
| KLF11    | Kruppel-like t | -1.8344318 | 0.00020839 | 0.00232199 | 7.73440463 | 8.31188524 |

|           |                 |            |            |            |            |            |
|-----------|-----------------|------------|------------|------------|------------|------------|
| KLF13     | Kruppel-like t  | -1.5784067 | 7.23E-05   | 0.00098593 | 22.5219451 | 23.7072983 |
| KLHL18    | kelch-like far  | 1.5037199  | 8.92E-06   | 0.00017652 | 27.310864  | 30.6065725 |
| KLHL21    | kelch-like far  | 1.6073607  | 8.51E-07   | 2.48E-05   | 138.457865 | 135.733495 |
| KLHL4     | kelch-like far  | -1.6497732 | 0.04787006 | 0.1404563  | 2.44455276 | 2.72285896 |
| KLK6      | kallikrein-rel  | -2.0434263 | 0.00036428 | 0.00359763 | 5.550337   | 4.36066886 |
| KLLN      | killin; p53-re  | 2.46803016 | 4.99E-07   | 1.60E-05   | 2.32432885 | 2.82522208 |
| KLRC2     | killer cell lec | -6.3703122 | 2.05E-07   | 7.39E-06   | 3.76701573 | 4.29925099 |
| KLRG1     | killer cell lec | 1.53842403 | 0.04041561 | 0.12431748 | 2.30429154 | 2.37482435 |
| KNTC1     | kinetochore a   | -1.8729428 | 2.16E-09   | 1.49E-07   | 56.004303  | 63.1580442 |
| KREMEN1   | kringle conta   | -2.2972192 | 0.00016186 | 0.00189845 | 7.05313583 | 7.69770653 |
| KRT17     | keratin 17; ty  | 6.67909794 | 8.30E-05   | 0.00110395 | 0.16029854 | 0.26614411 |
| KRT6A     | keratin 6A; ty  | 12.4989112 | 1.83E-10   | 1.74E-08   | 0.12022391 | 0.12283574 |
| KRTAP2-3  | keratin assoc   | 7.31762582 | 2.02E-09   | 1.43E-07   | 0.44082099 | 0.32756198 |
| KSR1      | kinase suppr    | 1.50758602 | 0.03519672 | 0.11276718 | 3.1658962  | 2.70238633 |
| LACC1     | laccase (mul    | 1.69250872 | 0.00198245 | 0.01342132 | 5.79078482 | 4.52444985 |
| LAGE3     | L antigen far   | 1.5167036  | 0.0032451  | 0.01966239 | 20.7786985 | 20.8820762 |
| LAMA5     | laminin; alph   | -1.7299023 | 0.00563263 | 0.02971884 | 800.751327 | 827.032581 |
| LAMB1     | laminin; beta   | -1.9059726 | 3.51E-06   | 8.07E-05   | 1119.76546 | 1150.92996 |
| LAMC1     | laminin; garr   | -1.5261479 | 0.0003455  | 0.00343839 | 990.384502 | 1007.92868 |
| LAMC3     | laminin; garr   | 2.5748785  | 0.00546434 | 0.02914384 | 0.44082099 | 0.40945247 |
| LAMTOR4   | late endosom    | 1.66017761 | 5.07E-05   | 0.00074023 | 38.5718366 | 37.2806478 |
| LANCL3    | LanC lantibio   | 2.30399326 | 0.00358319 | 0.02109216 | 0.84156734 | 0.73701445 |
| LARGE     | like-glycosylt  | 1.74616741 | 0.00837549 | 0.04013422 | 1.3625376  | 1.53544678 |
| LAT2      | linker for act  | 1.51427494 | 0.02307559 | 0.08346452 | 3.74697841 | 3.25514718 |
| LCAT      | lecithin-chole  | 1.80715536 | 0.00424818 | 0.02399558 | 1.9235825  | 1.71970039 |
| LCN2      | lipocalin 2     | -4.067674  | 2.53E-10   | 2.32E-08   | 16.7511976 | 15.5387214 |
| LCP1      | lymphocyte c    | 6.12739322 | 4.99E-06   | 0.00010816 | 0.3406344  | 0.24567148 |
| LDB2      | LIM domain l    | -2.6373019 | 0.00142878 | 0.01052746 | 4.88910552 | 4.13547    |
| LDHC      | lactate dehy    | 1.58153783 | 0.03727174 | 0.11715033 | 2.24417958 | 1.76064564 |
| LDLR      | low density l   | -1.881822  | 5.26E-12   | 7.07E-10   | 192.738959 | 198.482087 |
| LEF1      | lymphoid enl    | -1.6498319 | 1.11E-05   | 0.00021181 | 18.6347055 | 19.4489926 |
| LFNG      | LFNG O-fuco     | -2.1085568 | 3.87E-06   | 8.77E-05   | 19.8770192 | 18.0159089 |
| LGI4      | leucine-rich r  | -3.225959  | 0.00022077 | 0.00242577 | 1.42264956 | 1.82206351 |
| LGR6      | leucine-rich r  | -2.1315023 | 0.02117683 | 0.07864702 | 39.6939264 | 36.7483596 |
| LHX8      | LIM homeobi     | 2.01219605 | 0.04399926 | 0.13164676 | 0.44082099 | 0.88032282 |
| LIG4      | ligase IV; DN   | 1.59746485 | 9.50E-05   | 0.00123332 | 30.5168349 | 30.2994831 |
| LIMA1     | LIM domain ;    | 1.59095604 | 4.20E-06   | 9.45E-05   | 84.7778912 | 90.2023802 |
| LIMCH1    | LIM and calp    | -1.5988823 | 2.37E-07   | 8.34E-06   | 100.046327 | 103.120606 |
| LIN37     | lin-37 DREAM    | 1.59195224 | 0.0028893  | 0.01795698 | 8.25537489 | 6.20320499 |
| LINC00239 | long interger   | 1.81778644 | 0.03210746 | 0.10542937 | 0.72134344 | 0.75748708 |
| LINC00326 | long interger   | -2.509332  | 4.46E-08   | 2.00E-06   | 10.6798903 | 8.59850197 |
| LINC00341 | long interger   | -1.6689171 | 0.00352277 | 0.02081385 | 5.69059823 | 6.44887648 |
| LINC00342 | long interger   | -1.8058608 | 0.00068164 | 0.00589086 | 4.46832185 | 5.03626544 |

|                |                       |            |            |            |            |            |
|----------------|-----------------------|------------|------------|------------|------------|------------|
| LINC00461      | long interger         | -1.5175033 | 0.02448429 | 0.08700195 | 7.57410609 | 7.71817915 |
| LINC00473      | long interger         | 1.69009259 | 0.0001556  | 0.00183869 | 6.39190435 | 6.91974683 |
| LINC00491      | long interger         | 1.52809845 | 0.0389988  | 0.12124168 | 2.92544838 | 1.94489926 |
| LINC00552      | long interger         | 2.10129164 | 0.0007622  | 0.00641058 | 1.74324664 | 1.69922777 |
| LINC00648      | long interger         | -1.6068695 | 0.02563606 | 0.09011827 | 5.39003846 | 5.56855366 |
| LINC00662      | long interger         | 1.69486143 | 0.00671469 | 0.03401744 | 1.98369445 | 1.90395401 |
| LINC00669      | long interger         | -2.7610446 | 0.03525776 | 0.11293737 | 1.54287346 | 1.47402891 |
| LINC00685      | long interger         | 1.76357949 | 0.00827936 | 0.03978054 | 1.64306005 | 1.2897753  |
| LINC00701      | long interger         | 2.2720375  | 0.04071907 | 0.12490045 | 0.48089562 | 0.67559658 |
| LINC00707      | long interger         | 2.40333778 | 1.34E-12   | 2.01E-10   | 13.2847416 | 14.6993438 |
| LINC00853      | long interger         | 2.74194837 | 0.03158291 | 0.10421117 | 0.22041049 | 0.32756198 |
| LINC00941      | long interger         | 1.51486981 | 0.00232434 | 0.01518697 | 8.57597198 | 8.55755672 |
| LINC00993      | long interger         | -2.2238848 | 0.00507248 | 0.02749636 | 1.52283615 | 2.04726237 |
| LINC01001      | long interger         | 2.43746277 | 0.04646813 | 0.13719025 | 0.9016793  | 0.73701445 |
| LINC01021      | long interger         | 3.1353165  | 1.49E-06   | 3.94E-05   | 1.00186589 | 1.41261104 |
| LINC01024      | long interger         | 1.60582013 | 0.03321145 | 0.10806926 | 1.32246297 | 1.57639203 |
| LINC01089      | long interger         | -1.5575434 | 0.02389096 | 0.08571754 | 5.10951601 | 5.81422514 |
| LINC01106      | long interger         | -2.2359102 | 0.00554429 | 0.02940276 | 1.78332128 | 2.14962549 |
| LINC01119      | long interger         | 2.16769438 | 0.04169095 | 0.12697965 | 0.60111953 | 0.55276084 |
| LINC01123      | long interger         | -1.7974422 | 0.02637461 | 0.09213962 | 4.8690682  | 4.19688787 |
| LINC01134      | long interger         | 2.35151409 | 0.00874136 | 0.04122388 | 0.26048513 | 0.94174069 |
| LINC01239      | long interger         | -3.4890713 | 0.00010732 | 0.00136317 | 20.7586611 | 21.762399  |
| LINC01468      | long interger         | 2.49478177 | 4.33E-13   | 7.35E-11   | 12.6635848 | 11.7717587 |
| LINC01606      | long interger         | 1.87702066 | 0.02835779 | 0.09684674 | 1.00186589 | 0.67559658 |
| LIPT1          | lipoyltransferase     | 1.77982135 | 0.00196365 | 0.01333933 | 3.76701573 | 2.98900307 |
| LLPH           | LLP homolog           | 1.52765854 | 4.43E-05   | 0.00066299 | 39.5737025 | 36.9735585 |
| LMNB1          | lamin B1              | -1.8327075 | 6.39E-07   | 1.95E-05   | 140.842306 | 142.530407 |
| LMNB2          | lamin B2              | -1.5128594 | 0.00010337 | 0.00132123 | 225.119264 | 215.453892 |
| LMO2           | LIM domain containing | 1.5312723  | 0.00820615 | 0.0396024  | 3.86720232 | 4.21736049 |
| LNK1           | ligand of nuclear     | -1.5812146 | 0.01065301 | 0.04760618 | 6.15145653 | 5.75280727 |
| LOC1001290: NA |                       | -1.8000435 | 1.16E-06   | 3.22E-05   | 43.1804196 | 42.4192764 |
| LOC1001339: NA |                       | 2.07110047 | 0.04837658 | 0.14159266 | 0.66123148 | 0.96221332 |
| LOC1002722: NA |                       | 1.75762775 | 0.018107   | 0.0701394  | 1.0219032  | 1.2897753  |
| LOC1002886: NA |                       | -1.936516  | 1.06E-05   | 0.00020502 | 8.77634515 | 10.0725309 |
| LOC1005069: NA |                       | -2.2694557 | 0.00695107 | 0.03484606 | 2.64492594 | 2.14962549 |
| LOC1005070: NA |                       | -2.7863214 | 7.52E-06   | 0.00015315 | 3.6267545  | 2.82522208 |
| LOC1005074: NA |                       | 1.63068253 | 2.41E-06   | 5.87E-05   | 32.3201935 | 30.5656272 |
| LOC1006527: NA |                       | 1.6960151  | 0.03934279 | 0.12188568 | 1.86347055 | 1.47402891 |
| LOC1019271: NA |                       | 1.58202294 | 0.00260938 | 0.01663815 | 7.3536956  | 7.92290539 |
| LOC1019279: NA |                       | -3.6662279 | 0.03544576 | 0.11335179 | 1.28238833 | 1.12599431 |
| LOC1019286: NA |                       | -2.5457284 | 0.00637418 | 0.03274639 | 1.08201516 | 1.2078848  |
| LOC1019288: NA |                       | 5.25995845 | 3.92E-05   | 0.00060531 | 0.30055977 | 0.71654183 |
| LOC1019291: NA |                       | 7.95967907 | 0.00044113 | 0.00419387 | 0.08014927 | 0.02047262 |

|            |                |            |            |            |            |            |
|------------|----------------|------------|------------|------------|------------|------------|
| LOC1019304 | NA             | 1.92723049 | 2.25E-08   | 1.13E-06   | 11.160786  | 11.4032514 |
| LOC1026064 | NA             | 1.91221723 | 0.00334432 | 0.02007577 | 1.54287346 | 2.04726237 |
| LOC1027237 | NA             | 3.66275972 | 1.69E-05   | 0.00030408 | 0.54100758 | 0.53228822 |
| LOC1027238 | NA             | -2.4088756 | 1.01E-06   | 2.87E-05   | 8.69619588 | 8.41424836 |
| LOC115110  | NA             | 3.19365223 | 0.0055896  | 0.02954653 | 0.30055977 | 0.36850723 |
| LOC152225  | NA             | -1.8609165 | 0.00575907 | 0.03021813 | 3.2861201  | 3.52129128 |
| LOC344887  | NA             | 4.73725397 | 0.00222693 | 0.01470621 | 0.14026122 | 0.16378099 |
| LOC374443  | NA             | 1.59718804 | 0.02973539 | 0.09982317 | 1.2423137  | 1.82206351 |
| LOC388242  | NA             | -2.3945587 | 0.00402363 | 0.02302839 | 1.72320932 | 1.45355629 |
| LOC440300  | NA             | -1.5016605 | 0.04549978 | 0.13492127 | 6.15145653 | 5.91658826 |
| LOC440434  | NA             | -1.6242578 | 4.60E-06   | 0.00010153 | 18.5745935 | 19.3466294 |
| LOC613038  | NA             | -2.3945598 | 0.00402921 | 0.02304187 | 1.72320932 | 1.45355629 |
| LOC645166  | NA             | 1.85670535 | 4.08E-07   | 1.34E-05   | 16.2903393 | 17.1151134 |
| LOC650226  | NA             | 1.76650174 | 0.03899734 | 0.12124168 | 2.20410495 | 3.13231143 |
| LOC654342  | NA             | 2.21611056 | 0.00026096 | 0.00276453 | 5.61044896 | 5.81422514 |
| LOC728485  | NA             | 2.03762047 | 0.04667151 | 0.13759115 | 0.44082099 | 0.53228822 |
| LOC728743  | NA             | -1.6707945 | 0.01913018 | 0.07305044 | 5.24977724 | 4.99532019 |
| LOC730101  | NA             | -1.86788   | 0.0002738  | 0.00286065 | 14.4268687 | 15.2725773 |
| LONRF1     | LON peptida    | -1.5947565 | 0.0019844  | 0.01342812 | 9.15705419 | 9.00795445 |
| LOXL2      | lysyl oxidase  | -1.849486  | 2.80E-08   | 1.37E-06   | 309.696782 | 308.829529 |
| LOXL3      | lysyl oxidase  | -3.0695374 | 4.14E-23   | 3.50E-20   | 146.392643 | 140.565035 |
| LOXL4      | lysyl oxidase  | -2.2165225 | 1.14E-10   | 1.16E-08   | 540.947466 | 536.382742 |
| LPAR4      | lysophosphat   | -1.8340003 | 0.01913713 | 0.07305741 | 1.40261224 | 1.49450153 |
| LPIN2      | lipin 2        | -1.5493836 | 0.00066956 | 0.00581114 | 55.7638552 | 61.0288914 |
| LRFN1      | leucine rich r | -1.561979  | 0.0006756  | 0.00585291 | 11.8620921 | 13.5119317 |
| LRIG1      | leucine-rich r | -1.5124397 | 0.00510959 | 0.02766595 | 10.0186589 | 9.84733202 |
| LRIG3      | leucine-rich r | -1.6499945 | 6.41E-05   | 0.00089038 | 69.8901641 | 74.0904253 |
| LRP1B      | low density l  | -1.7190052 | 0.01477549 | 0.06061184 | 4.62862039 | 6.039424   |
| LRP5       | low density l  | -1.7152104 | 4.24E-06   | 9.51E-05   | 117.378607 | 118.659327 |
| LRRC17     | leucine rich r | -2.9091309 | 3.27E-07   | 1.11E-05   | 9.0568676  | 9.21268068 |
| LRRC46     | leucine rich r | 1.97200991 | 0.0103094  | 0.04649879 | 1.30242565 | 1.61733728 |
| LRRC4B     | leucine rich r | -1.6914069 | 8.03E-05   | 0.00107455 | 52.6781082 | 46.9846715 |
| LSAMP      | limbic system  | -1.6229735 | 0.04158818 | 0.1267479  | 3.34623206 | 3.43940079 |
| LSMEM1     | leucine-rich s | 1.84784965 | 0.02984307 | 0.10003827 | 0.52097026 | 0.94174069 |
| LSMEM2     | leucine-rich s | 3.22401254 | 0.00701132 | 0.0350345  | 0.24044781 | 0.4299251  |
| LTB        | lymphotoxin    | -2.508636  | 0.00152204 | 0.01101601 | 2.86533643 | 2.94805782 |
| LTBP2      | latent transfo | -1.7599669 | 0.00109794 | 0.00853071 | 35.3458284 | 35.7861463 |
| LTBP3      | latent transfo | -1.5209835 | 0.00028068 | 0.00292393 | 632.197411 | 626.871739 |
| LUCAT1     | lung cancer a  | -2.477541  | 0.00259056 | 0.01654035 | 2.56477667 | 2.80474945 |
| LVRN       | laeverin       | 3.82316483 | 0.00101933 | 0.00807025 | 0.44082099 | 0.59370609 |
| LYNX1      | Ly6/neurotox   | 1.68673522 | 0.01182287 | 0.05149362 | 1.56291078 | 1.41261104 |
| LYPD3      | LY6/PLAUR c    | 2.04477661 | 2.42E-13   | 4.26E-11   | 14.0060851 | 14.3308366 |
| LYPD6      | LY6/PLAUR c    | -1.6608045 | 0.0224212  | 0.08184543 | 2.18406763 | 2.45671485 |

|           |               |            |            |            |            |            |
|-----------|---------------|------------|------------|------------|------------|------------|
| LZTS1     | leucine zippe | -2.5562568 | 4.02E-10   | 3.45E-08   | 15.0279883 | 14.2284735 |
| MAB21L1   | mab-21-like   | 2.61964582 | 5.37E-13   | 8.80E-11   | 4.94921747 | 5.2614643  |
| MAF       | v-maf avian   | 1.90175503 | 3.10E-10   | 2.76E-08   | 11.100674  | 12.5087731 |
| MAFB      | v-maf avian   | 2.37576295 | 0.00484037 | 0.0265104  | 1.54287346 | 1.26930267 |
| MAGEA2    | melanoma a    | 1.54688097 | 0.00017911 | 0.00205014 | 35.886836  | 41.7846251 |
| MAGEB2    | melanoma a    | 2.94263242 | 0.00074331 | 0.00628656 | 0.96179125 | 0.38897985 |
| MAGEC1    | melanoma a    | 2.00821442 | 0.0121402  | 0.05252278 | 0.96179125 | 0.83937757 |
| MAGEH1    | melanoma a    | 1.77164681 | 0.00016131 | 0.00189354 | 4.16776208 | 4.42208673 |
| MAGIX     | MAGI family   | 1.9662455  | 0.00051772 | 0.00478396 | 2.30429154 | 2.19057074 |
| MALAT1    | metastasis a  | 2.17222618 | 0.00445856 | 0.02491724 | 565.052359 | 491.363442 |
| MALT1     | MALT1 parac   | -1.5756884 | 0.00031187 | 0.00316785 | 121.085511 | 130.512976 |
| MAML2     | mastermind-   | -1.9608438 | 3.08E-05   | 0.00049343 | 51.4157572 | 56.422551  |
| MAN1A1    | mannosidase   | -1.9516892 | 1.88E-05   | 0.00033097 | 24.2050798 | 25.6931428 |
| MANSC1    | MANSC dom     | -1.5604531 | 9.56E-05   | 0.00123687 | 21.1193329 | 21.9671253 |
| MAP1LC3B2 | microtubule-  | 2.22948472 | 0.00776811 | 0.03810787 | 2.02376909 | 1.26930267 |
| MAP2      | microtubule-  | -4.3392945 | 7.99E-11   | 8.56E-09   | 3.76701573 | 4.89295707 |
| MAP2K3    | mitogen-acti  | 1.68465259 | 7.29E-06   | 0.0001491  | 51.7964663 | 53.4130753 |
| MAP3K1    | mitogen-acti  | -1.8761443 | 2.72E-05   | 0.00044481 | 29.454857  | 29.9514485 |
| MAP3K6    | mitogen-acti  | -1.7825784 | 0.00021683 | 0.002388   | 15.5890332 | 16.7466062 |
| MAP7      | microtubule-  | 2.22738401 | 1.26E-06   | 3.43E-05   | 3.42638133 | 2.45671485 |
| MAPK3     | mitogen-acti  | -1.5898034 | 8.13E-06   | 0.00016356 | 56.885945  | 57.9375252 |
| MAPK4     | mitogen-acti  | 3.56504426 | 0.01449344 | 0.05979908 | 0.3406344  | 0.30708936 |
| 3-Mar     | membrane-a    | 2.91597443 | 0.00473239 | 0.02604914 | 0.42078367 | 0.49134297 |
| 4-Mar     | membrane-a    | 1.57322837 | 8.34E-06   | 0.00016578 | 11.2810099 | 12.897753  |
| MARCKS    | myristoylate  | -2.0580245 | 1.37E-16   | 4.64E-14   | 106.017448 | 105.085978 |
| MAST1     | microtubule   | -2.0091459 | 0.00199745 | 0.01349724 | 3.30615742 | 2.98900307 |
| MAST4     | microtubule   | 1.76365403 | 1.11E-07   | 4.45E-06   | 13.3849282 | 14.0032746 |
| MATN2     | matrilin 2    | 1.95369943 | 0.04941203 | 0.14391394 | 0.5610449  | 0.38897985 |
| MBOAT1    | membrane b    | -2.0289608 | 0.00087308 | 0.00716305 | 6.91287461 | 6.34651336 |
| MCF2      | MCF.2 cell li | 2.17505771 | 0.00185396 | 0.01286309 | 0.82153003 | 0.81890495 |
| MCF2L     | MCF.2 cell li | 1.57619539 | 4.30E-07   | 1.41E-05   | 25.8681772 | 27.4537884 |
| MCM2      | minichromos   | -1.7476655 | 5.22E-09   | 3.22E-07   | 183.84239  | 175.450385 |
| MCM5      | minichromos   | -1.8498032 | 1.05E-08   | 5.84E-07   | 74.1981874 | 71.4699295 |
| MCM6      | minichromos   | -1.7221138 | 7.97E-07   | 2.37E-05   | 69.2890446 | 73.9675896 |
| MCTP2     | multiple C2 c | 1.57738365 | 0.02862404 | 0.09740239 | 1.5829481  | 1.69922777 |
| MDK       | midkine (neu  | -2.0982747 | 6.81E-09   | 4.03E-07   | 97.4214387 | 93.6827263 |
| MDM2      | MDM2 proto    | 4.97760801 | 5.63E-18   | 2.23E-15   | 99.6455809 | 100.11113  |
| MED6      | mediator cor  | 1.50234267 | 0.00040575 | 0.00393091 | 21.1794448 | 21.6600359 |
| MEGF11    | multiple EGF  | 2.30470421 | 0.00323098 | 0.01961468 | 0.74138075 | 0.61417871 |
| MELK      | maternal em   | -1.7258701 | 4.03E-08   | 1.85E-06   | 54.2209817 | 52.3689715 |
| MEOX2     | mesenchyme    | -2.7109114 | 8.38E-14   | 1.59E-11   | 66.4036709 | 65.2871971 |
| METTL21B  | methyltransf  | -2.0081372 | 2.07E-05   | 0.00035622 | 9.31735273 | 11.4441967 |
| METTL7A   | methyltransf  | -2.1669012 | 3.34E-06   | 7.74E-05   | 6.87279997 | 6.16225975 |



|            |                 |            |            |            |            |            |
|------------|-----------------|------------|------------|------------|------------|------------|
| MEX3A      | mex-3 RNA b     | -2.0149152 | 3.49E-10   | 3.07E-08   | 38.8723963 | 39.3688555 |
| MFAP2      | microfibrillar  | -1.740972  | 9.67E-06   | 0.00018831 | 81.7522562 | 80.2526851 |
| MFSD7      | major facilitat | 1.84652035 | 0.04466595 | 0.13305488 | 0.80149271 | 0.53228822 |
| MGAT3      | mannosyl (b     | -2.1689238 | 0.0048535  | 0.02656027 | 2.2642169  | 1.9858445  |
| MGAT4A     | mannosyl (a     | 2.1812199  | 0.0085756  | 0.04068272 | 0.44082099 | 0.96221332 |
| MGAT5B     | mannosyl (a     | -1.6067382 | 1.40E-05   | 0.00025813 | 19.676646  | 18.8962317 |
| MGLL       | monoglyceric    | -1.5692963 | 7.36E-08   | 3.10E-06   | 53.2191158 | 50.8335248 |
| MGP        | matrix Gla p    | -5.3226483 | 1.52E-05   | 0.00027648 | 2.24417958 | 1.2078848  |
| MICA       | MHC class I p   | 1.91230694 | 0.0002631  | 0.00278145 | 9.03683028 | 8.70086509 |
| MICAL3     | microtubule     | -1.5510322 | 3.84E-05   | 0.00059553 | 129.300811 | 131.86417  |
| MINOS1-NBI | MINOS1-NBI      | 609.71218  | 6.50E-06   | 0.00013549 | 0          | 0          |
| MIR210HG   | MIR210 host     | -3.0982621 | 8.96E-06   | 0.00017711 | 12.0223906 | 12.7134993 |
| MIR22HG    | MIR22 host g    | 1.97112992 | 1.23E-08   | 6.61E-07   | 13.5251894 | 13.5938222 |
| MIR663A    | microRNA 66     | 3.21258015 | 0.00225657 | 0.01486641 | 0.88164198 | 0.4299251  |
| MIRLET7BHG | MIRLET7B ho     | -1.7037813 | 0.0131097  | 0.05565276 | 5.39003846 | 5.20004643 |
| MIS18BP1   | MIS18 bindir    | -1.5700998 | 0.00058712 | 0.00526229 | 38.5317619 | 39.1641292 |
| MISP       | mitotic spinc   | 1.52937973 | 9.19E-06   | 0.00018115 | 24.8462739 | 27.8837135 |
| MKI67      | marker of pr    | -2.080345  | 1.30E-05   | 0.00024167 | 345.844104 | 350.102339 |
| MLH3       | mutL homolog    | 2.28414032 | 0.0029408  | 0.01819535 | 0.98182857 | 0.55276084 |
| MLPH       | melanophilin    | -1.9166731 | 4.36E-06   | 9.69E-05   | 23.523811  | 22.5608314 |
| MMD        | monocyte to     | -1.6386641 | 6.34E-05   | 0.00088526 | 21.9809375 | 23.1545375 |
| MME        | membrane n      | -1.5236018 | 0.00663303 | 0.03372859 | 7.61418073 | 7.53392554 |
| MMP1       | matrix metal    | 3.65445537 | 1.42E-09   | 1.07E-07   | 6.91287461 | 7.39061717 |
| MMP10      | matrix metal    | 5.18799069 | 5.66E-07   | 1.75E-05   | 0.54100758 | 0.26614411 |
| MMP11      | matrix metal    | -1.7959081 | 0.03170058 | 0.10453064 | 4.68873234 | 3.33703767 |
| MMP2       | matrix metal    | -1.9190431 | 2.54E-06   | 6.12E-05   | 725.771684 | 737.976668 |
| MMP3       | matrix metal    | 2.38713691 | 0.03076641 | 0.10208432 | 0.64119417 | 0.88032282 |
| MMP9       | matrix metal    | -5.0031458 | 1.02E-38   | 7.30E-35   | 42.9600091 | 43.4838528 |
| MMRN2      | multimerin 2    | -2.2488393 | 0.01204254 | 0.0521974  | 0.98182857 | 1.49450153 |
| MNS1       | meiosis-spec    | -1.6164252 | 0.00170781 | 0.01201879 | 7.63421804 | 6.77643846 |
| MORN2      | MORN repea      | 1.54960362 | 0.0003193  | 0.00322947 | 7.85462854 | 8.72133771 |
| MOSPD1     | motile sperm    | 1.97722463 | 1.33E-06   | 3.56E-05   | 10.6999277 | 9.58118791 |
| MPV17L2    | MPV17 mito      | 1.66848195 | 0.00030305 | 0.00310038 | 12.1025399 | 12.4883005 |
| MRC2       | mannose rec     | -1.6160892 | 3.54E-05   | 0.00055704 | 134.39029  | 128.936584 |
| MRGPRX4    | MAS-related     | 3.57491093 | 8.04E-05   | 0.00107456 | 0.64119417 | 0.73701445 |
| MRPL27     | mitochondria    | 1.60069895 | 0.00035724 | 0.00354003 | 31.4986634 | 30.6679904 |
| MRPL52     | mitochondria    | 1.59388132 | 0.00662076 | 0.03370934 | 18.4744069 | 20.0426986 |
| MSX2       | msh homeok      | 1.71008343 | 0.00019056 | 0.00215702 | 6.47205362 | 5.20004643 |
| MTRNR2L2   | MT-RNR2-lik     | 1.92502498 | 0.00030018 | 0.00308206 | 3.10578424 | 3.60318178 |
| MUC13      | mucin 13; ce    | 2.53001548 | 0.00327743 | 0.01976585 | 0.78145539 | 0.53228822 |
| MUC20      | mucin 20; ce    | 2.15580373 | 0.00725265 | 0.03596294 | 0.58108221 | 0.71654183 |
| MUC5AC     | mucin 5AC; c    | -2.4614511 | 0.005512   | 0.02934066 | 1.48276151 | 1.49450153 |
| MUC5B      | mucin 5B; oli   | -1.7023404 | 0.00251279 | 0.01615963 | 13.5251894 | 12.2835742 |

|         |               |            |            |            |            |            |
|---------|---------------|------------|------------|------------|------------|------------|
| MXD1    | MAX dimeriz   | 2.07198399 | 1.46E-08   | 7.66E-07   | 8.87653174 | 9.76544153 |
| MXD3    | MAX dimeriz   | -1.8370443 | 6.32E-06   | 0.00013229 | 11.1407486 | 11.2189978 |
| MXI1    | MAX interact  | -1.6296819 | 1.13E-08   | 6.15E-07   | 41.877994  | 42.1326597 |
| MYB     | v-myb avian   | -1.9307648 | 0.04433094 | 0.1322781  | 1.12208979 | 1.24883005 |
| MYBL2   | v-myb avian   | -1.6654613 | 4.35E-08   | 1.97E-06   | 106.458269 | 97.941032  |
| MYCN    | v-myc avian   | -4.9547703 | 0.00152788 | 0.01104147 | 0.86160466 | 1.41261104 |
| MYEOV2  | myeloma ov    | 1.56131464 | 0.00104287 | 0.00822006 | 19.7768326 | 16.4190442 |
| MYH10   | myosin; heav  | -1.5770113 | 0.00067738 | 0.00586115 | 232.513035 | 236.131242 |
| MYH14   | myosin; heav  | 1.77332057 | 1.74E-08   | 9.00E-07   | 13.0442938 | 13.0410613 |
| MYH16   | myosin; heav  | 1.75735378 | 1.63E-05   | 0.00029326 | 7.4739195  | 5.56855366 |
| MYH6    | myosin; heav  | 5.89992982 | 1.65E-05   | 0.00029668 | 0.22041049 | 0.45039772 |
| MYH7    | myosin; heav  | 5.18032911 | 0.00115975 | 0.00893386 | 0.24044781 | 0.24567148 |
| MYOCD   | myocardin     | 7.33843742 | 2.28E-05   | 0.00038861 | 0.22041049 | 0.08189049 |
| MYPN    | myopalladin   | 1.8827174  | 0.00402802 | 0.02304187 | 1.703172   | 2.60002322 |
| MYRF    | myelin regul  | -2.1213292 | 5.12E-11   | 5.79E-09   | 29.9958646 | 30.19712   |
| MYRIP   | myosin VIIA   | 2.60310222 | 0.01222708 | 0.05283447 | 0.60111953 | 0.38897985 |
| MYT1    | myelin trans  | 3.85164929 | 0.00248662 | 0.01602029 | 0.32059708 | 0.10236312 |
| N4BP2L1 | NEDD4 bindi   | -1.8484098 | 0.04720713 | 0.13876831 | 1.72320932 | 1.49450153 |
| N6AMT2  | N-6 adenine-  | 1.50291048 | 0.00487687 | 0.02662847 | 5.16962797 | 5.3433548  |
| NAALAD2 | N-acetylated  | -1.9245818 | 0.01441347 | 0.05955533 | 2.38444081 | 2.35435173 |
| NABP1   | nucleic acid  | 1.65148788 | 7.50E-05   | 0.00101222 | 16.2302273 | 18.4867792 |
| NADSYN1 | NAD synthet   | 1.54589469 | 2.84E-05   | 0.00046156 | 22.6020944 | 23.2978458 |
| NAGA    | N-acetyl gala | -1.5276602 | 0.00032422 | 0.00326531 | 17.3322798 | 15.1906868 |
| NALCN   | sodium leak   | -1.8318001 | 0.01808601 | 0.07009621 | 10.2591067 | 10.2158392 |
| NANOS1  | nanos homol   | -1.7898747 | 1.28E-05   | 0.00024003 | 13.4250029 | 11.2189978 |
| NAP1L2  | nucleosome    | 2.50748108 | 7.99E-05   | 0.00107039 | 1.52283615 | 1.26930267 |
| NAT1    | N-acetyltran  | 1.72422305 | 0.00827288 | 0.03976804 | 2.58481398 | 2.02678975 |
| NAT8L   | N-acetyltran  | -1.732509  | 5.33E-07   | 1.69E-05   | 39.2130307 | 35.4995296 |
| NAV1    | neuron navig  | -1.6724285 | 3.55E-06   | 8.16E-05   | 55.4833327 | 56.9343666 |
| NAV2    | neuron navig  | -1.7225575 | 0.00077667 | 0.00650692 | 7.51399414 | 7.73865178 |
| NCAM2   | neural cell a | -1.652788  | 0.00307421 | 0.01886763 | 9.99862153 | 11.0552168 |
| NCAPD2  | non-SMC cor   | -1.8447153 | 5.61E-07   | 1.74E-05   | 337.488542 | 343.817243 |
| NCAPG   | non-SMC cor   | -1.8201254 | 2.12E-07   | 7.59E-06   | 120.103682 | 130.901956 |
| NCAPG2  | non-SMC cor   | -1.7709503 | 5.79E-09   | 3.54E-07   | 72.3347169 | 71.5927652 |
| NCAPH   | non-SMC cor   | -1.5548268 | 6.35E-05   | 0.00088696 | 41.0364266 | 41.9074608 |
| NCF2    | neutrophil cy | 2.93592556 | 0.00125588 | 0.00953814 | 0.58108221 | 0.38897985 |
| NCOR2   | nuclear rece  | -1.6072613 | 0.00022586 | 0.00246456 | 237.983222 | 230.624106 |
| NDC80   | NDC80 kinet   | -1.6591124 | 1.73E-05   | 0.00030779 | 34.5042611 | 32.8585611 |
| NDRG1   | N-myc down    | -2.9929098 | 3.36E-19   | 1.65E-16   | 508.687384 | 511.733703 |
| NDUFAF1 | NADH dehydi   | 1.53100711 | 9.95E-05   | 0.00128075 | 26.9902669 | 24.7718747 |
| NDUFS5  | NADH dehydi   | 1.53566243 | 0.00017375 | 0.00200986 | 74.3384487 | 68.6856527 |
| NDUFS6  | NADH dehydi   | 1.62957548 | 0.0004096  | 0.00395474 | 48.8109059 | 44.4051209 |
| NEAT1   | nuclear para  | 1.65728328 | 0.00052482 | 0.00483157 | 185.084704 | 176.57638  |

|            |                |            |            |            |            |            |
|------------|----------------|------------|------------|------------|------------|------------|
| NEBL       | nebulette      | -1.8717454 | 0.00052134 | 0.00481191 | 6.89283729 | 7.80006965 |
| NEFL       | neurofilamer   | 2.29407544 | 1.89E-25   | 2.36E-22   | 50.7545257 | 50.9358879 |
| NEIL3      | nei-like DNA   | -1.9177235 | 1.36E-05   | 0.00025111 | 14.066197  | 15.2521047 |
| NEK2       | NIMA-relate    | -1.9331434 | 4.92E-06   | 0.000107   | 47.0075473 | 48.6224814 |
| NEMP1      | nuclear enve   | -1.5774464 | 3.73E-05   | 0.00058152 | 46.4264651 | 47.3122335 |
| NES        | nestin         | -1.8832619 | 3.54E-11   | 4.20E-09   | 333.040257 | 337.9416   |
| NET1       | neuroepithel   | -1.5330227 | 0.00017744 | 0.00203764 | 211.193329 | 213.48852  |
| NETO1      | neuropilin (N  | -1.6215967 | 0.00091455 | 0.00743686 | 8.45574807 | 9.60166054 |
| NEU1       | sialidase 1 (I | 1.55615512 | 0.00130996 | 0.00986174 | 23.9245573 | 23.1750101 |
| NEURL1B    | neuralized E   | -2.2363553 | 0.00407288 | 0.02321702 | 1.18220174 | 1.92442663 |
| NEXN       | nexilin (F act | 1.90955349 | 1.54E-06   | 4.04E-05   | 8.09507635 | 7.88196014 |
| NFASC      | neurofascin    | 1.59489973 | 9.51E-05   | 0.00123332 | 10.5396291 | 9.66307841 |
| NFATC1     | nuclear factc  | -2.4400453 | 1.25E-07   | 4.89E-06   | 8.63608393 | 8.33235786 |
| NFATC2     | nuclear factc  | -1.8910779 | 6.60E-07   | 2.00E-05   | 12.4632116 | 14.2694187 |
| NFATC4     | nuclear factc  | -2.1854769 | 1.24E-07   | 4.87E-06   | 13.6454134 | 15.4977762 |
| NFE2       | nuclear factc  | -1.9977954 | 6.18E-05   | 0.00086952 | 8.3755988  | 8.04574113 |
| NFE2L3     | nuclear factc  | -1.6659274 | 9.23E-10   | 7.35E-08   | 81.2112486 | 83.1802703 |
| NFIX       | nuclear factc  | -1.9013268 | 1.95E-07   | 7.09E-06   | 168.934626 | 172.543273 |
| NFKBIB     | nuclear factc  | 1.59130205 | 0.0010864  | 0.00846729 | 20.7786985 | 21.004912  |
| NGEF       | neuronal gua   | -3.1458868 | 2.13E-06   | 5.36E-05   | 7.09321047 | 6.59218485 |
| NGFR       | nerve growth   | -1.8797276 | 4.57E-12   | 6.26E-10   | 85.1986749 | 84.4495729 |
| NHLH1      | nescient heli  | 2.97121964 | 0.00324189 | 0.0196513  | 0.30055977 | 0.20472624 |
| NHLH2      | nescient heli  | 4.20052829 | 9.98E-07   | 2.84E-05   | 0.58108221 | 0.65512396 |
| NID1       | nidogen 1      | -2.5223467 | 2.11E-07   | 7.57E-06   | 259.904048 | 256.051105 |
| NIPBL-AS1  | NIPBL antise   | -1.5033324 | 0.00136439 | 0.01018004 | 16.4506378 | 16.7466062 |
| NKX3-1     | NK3 homeob     | 1.63688683 | 0.0052275  | 0.02817592 | 7.1332851  | 6.5512396  |
| NLRC4      | NLR family; (  | 2.22457268 | 0.04311159 | 0.13011082 | 0.52097026 | 0.45039772 |
| NLRP1      | NLR family; p  | 1.80295764 | 1.05E-06   | 2.94E-05   | 11.7218309 | 13.2048423 |
| NME1       | NME/NM23       | 1.52803887 | 0.00069363 | 0.00596943 | 209.129485 | 200.324623 |
| NME1-NME2  | NME1-NME2      | 1.76659494 | 0.00164553 | 0.01166603 | 4.5284338  | 6.38745861 |
| NMNAT2     | nicotinamide   | -1.8002349 | 1.06E-10   | 1.08E-08   | 48.4301969 | 52.6965335 |
| NMT2       | N-myristoylt   | -1.5218758 | 1.02E-06   | 2.87E-05   | 31.9595217 | 36.3593798 |
| NMU        | neuromedin     | -1.7335828 | 0.01711966 | 0.06741883 | 3.6267545  | 3.86932589 |
| NOCT       | nocturnin      | 1.57533137 | 0.0005414  | 0.00494898 | 11.0004874 | 10.6867096 |
| NOG        | noggin         | -1.6449115 | 0.00195205 | 0.01329125 | 8.45574807 | 7.84101489 |
| NOL4L      | nucleolar prc  | -1.8059851 | 1.32E-07   | 5.13E-06   | 36.7885153 | 38.9798756 |
| NOL6       | nucleolar prc  | 1.52817078 | 1.30E-07   | 5.08E-06   | 139.219283 | 144.680032 |
| NOTUM      | notum pectir   | -4.6612156 | 0.004856   | 0.02656027 | 1.16216443 | 1.59686465 |
| NOV        | nephroblastc   | 1.68523189 | 1.59E-06   | 4.15E-05   | 8.73627052 | 8.86464608 |
| NOXO1      | NADPH oxida    | 1.77590524 | 0.00217383 | 0.01442906 | 2.44455276 | 2.51813272 |
| NPC2       | Niemann-Pic    | -1.5406423 | 1.58E-05   | 0.00028599 | 118.761182 | 121.423131 |
| NPHP3-ACAC | NPHP3-ACAC     | -1.6240384 | 0.00298842 | 0.01843635 | 7.85462854 | 5.97800613 |
| NPHP4      | nephronopht    | -1.5647794 | 1.30E-05   | 0.00024226 | 21.9007882 | 20.67735   |

|           |                 |            |            |            |            |            |
|-----------|-----------------|------------|------------|------------|------------|------------|
| NPIPB6    | nuclear pore    | 2.47719111 | 0.0198255  | 0.0749226  | 0.48089562 | 0.51181559 |
| NPIPB9    | nuclear pore    | 2.17320663 | 0.00077073 | 0.00646482 | 1.38257492 | 1.49450153 |
| NPL       | N-acetylneur    | 1.50249515 | 0.00226417 | 0.01489002 | 5.32992651 | 4.66775821 |
| NPTX2     | neuronal per    | -1.9787043 | 0.0063459  | 0.03263636 | 2.68500057 | 3.84885326 |
| NR1H3     | nuclear recej   | -1.5034719 | 0.00018076 | 0.00206415 | 29.0340733 | 29.112071  |
| NR2F1     | nuclear recej   | -3.1481516 | 9.97E-10   | 7.81E-08   | 85.2988614 | 83.5078323 |
| NR2F1-AS1 | NR2F1 antisense | -1.7718768 | 1.88E-05   | 0.00033097 | 9.17709151 | 9.60166054 |
| NR2F2-AS1 | NR2F2 antisense | -2.2199106 | 0.03173172 | 0.10455693 | 1.04194052 | 0.71654183 |
| NR4A1     | nuclear recej   | 3.21757758 | 4.11E-16   | 1.27E-13   | 29.3145958 | 29.2349067 |
| NR4A3     | nuclear recej   | 4.12456532 | 6.27E-06   | 0.00013143 | 1.00186589 | 0.96221332 |
| NRBP2     | nuclear recej   | -1.5394601 | 0.00971395 | 0.0444552  | 11.7819428 | 11.7103408 |
| NREP      | neuronal reg    | -1.5208285 | 9.47E-06   | 0.00018572 | 64.5802749 | 66.0037389 |
| NRG1      | neuregulin 1    | 1.78991455 | 4.57E-05   | 0.00067732 | 4.92918015 | 5.05673806 |
| NRG4      | neuregulin 4    | 2.72281249 | 0.0068021  | 0.03432605 | 0.54100758 | 1.02363119 |
| NRM       | nurim (nucle    | -2.6052206 | 2.07E-14   | 4.40E-12   | 15.9897795 | 16.7261336 |
| NRN1      | neuritin 1      | -2.7155354 | 7.55E-14   | 1.45E-11   | 43.9218004 | 42.1736049 |
| NRP1      | neuropilin 1    | -1.5426995 | 0.0055459  | 0.02940276 | 239.486021 | 246.285664 |
| NRXN2     | neurexin 2      | 3.50777686 | 0.01129148 | 0.04978801 | 0.26048513 | 0.18425361 |
| NRXN3     | neurexin 3      | 1.95578574 | 4.04E-05   | 0.00062129 | 2.56477667 | 2.21104336 |
| NT5DC3    | 5'-nucleotida   | -1.5338408 | 2.21E-06   | 5.45E-05   | 31.9394844 | 33.6774661 |
| NTN1      | netrin 1        | 3.04017103 | 2.23E-07   | 7.89E-06   | 2.36440349 | 1.61733728 |
| NTNG1     | netrin G1       | 1.60466706 | 0.02143876 | 0.07941869 | 2.22414226 | 1.96537188 |
| NUAK2     | NUAK family     | 1.5337301  | 0.00488755 | 0.02666631 | 7.85462854 | 7.24730881 |
| NUCKS1    | nuclear casei   | -1.5170626 | 2.40E-06   | 5.85E-05   | 567.65721  | 561.011308 |
| NUDT14    | nudix (nucleo   | 1.71954849 | 0.01507211 | 0.0615981  | 2.04380641 | 2.39529698 |
| NUF2      | NUF2; NDC80     | -1.5698237 | 1.70E-05   | 0.00030486 | 60.5327368 | 60.9265283 |
| NUP210    | nucleoporin 2   | -2.4443175 | 1.06E-05   | 0.00020455 | 69.6697536 | 73.9880622 |
| NUSAP1    | nucleolar an    | -2.0651489 | 3.64E-11   | 4.28E-09   | 88.0840486 | 91.7173544 |
| NYNRIN    | NYN domain      | -4.0798063 | 4.07E-07   | 1.34E-05   | 8.75630783 | 7.77959702 |
| OAS3      | 2'-5'-oligoad   | -1.5502988 | 0.00025191 | 0.00269117 | 80.3897186 | 80.1093767 |
| OIP5      | Opa interacti   | -1.5446719 | 9.69E-05   | 0.00125104 | 17.3122425 | 15.9891191 |
| OLFML2A   | olfactomedir    | -2.4818097 | 1.28E-11   | 1.62E-09   | 11.3210845 | 12.1402659 |
| OLFML3    | olfactomedir    | -2.145814  | 0.03930038 | 0.12183375 | 1.50279883 | 1.5559194  |
| OLMALINC  | oligodendroc    | -2.4226629 | 6.39E-08   | 2.73E-06   | 17.6128023 | 16.5623526 |
| ONECUT2   | one cut hom     | 1.65655122 | 0.02039465 | 0.07656589 | 2.62488862 | 1.92442663 |
| ORAOV1    | oral cancer o   | 1.68434527 | 2.68E-05   | 0.00043934 | 13.3448536 | 11.7308134 |
| OSBPL5    | oxysterol bin   | -1.5532973 | 5.12E-05   | 0.00074631 | 15.007951  | 15.9481739 |
| OSGIN1    | oxidative stre  | 2.29148384 | 0.00017927 | 0.00205042 | 3.80709036 | 3.02994831 |
| OSR2      | odd-skipped     | 1.63312904 | 0.01262867 | 0.05412025 | 2.14399299 | 2.47718747 |
| OTUB2     | OTU deubiqu     | 1.55209674 | 0.00039207 | 0.00382432 | 7.11324778 | 8.06621376 |
| OVCA2     | ovarian tumo    | 1.50601526 | 0.00349361 | 0.02069306 | 32.7610144 | 33.9026649 |
| OVGP1     | oviductal gly   | 2.33465817 | 0.01144687 | 0.05027099 | 0.52097026 | 0.75748708 |
| P4HA1     | prolyl 4-hydr   | -1.604577  | 1.17E-07   | 4.63E-06   | 142.425254 | 141.650084 |

|           |               |            |            |            |            |            |
|-----------|---------------|------------|------------|------------|------------|------------|
| P4HA2-AS1 | P4HA2 antise  | -1.6976323 | 0.03592701 | 0.1143869  | 4.08761281 | 3.74649015 |
| PABPC4L   | poly(A) bindi | -1.8226784 | 0.0027521  | 0.0173081  | 3.14585888 | 3.48034604 |
| PADI2     | peptidyl argi | -3.5947944 | 4.38E-05   | 0.00065802 | 2.08388104 | 1.86300876 |
| PADI3     | peptidyl argi | -3.1885428 | 7.52E-06   | 0.00015315 | 8.47578539 | 9.78591415 |
| PADI4     | peptidyl argi | 2.81319385 | 0.00614952 | 0.03182744 | 0.3406344  | 0.24567148 |
| PAG1      | phosphoprot   | 1.70091217 | 0.01016689 | 0.04607196 | 5.02936674 | 4.68823084 |
| PAGE1     | P antigen far | 2.38147339 | 0.00100983 | 0.00801736 | 1.26235102 | 1.2897753  |
| PAICS     | phosphoribo   | -1.5640767 | 3.29E-07   | 1.11E-05   | 406.797624 | 407.85561  |
| PALM      | paralemmin    | -2.5922959 | 3.89E-09   | 2.52E-07   | 24.8462739 | 25.1199093 |
| PAQR8     | progesteron   | -1.9966844 | 6.58E-09   | 3.92E-07   | 17.3923918 | 17.7497648 |
| PARD6A    | par-6 family  | 1.85845382 | 0.00011395 | 0.00142819 | 6.69246411 | 6.91974683 |
| PARM1     | prostate and  | 3.46742819 | 3.00E-06   | 7.07E-05   | 0.86160466 | 1.10552168 |
| PAX6      | paired box 6  | -1.9474087 | 0.01378911 | 0.05772874 | 1.86347055 | 1.84253614 |
| PBK       | PDZ binding   | -1.8017696 | 3.09E-07   | 1.06E-05   | 56.9260196 | 54.9689948 |
| PCDH18    | protocadheri  | -2.4215063 | 5.84E-06   | 0.0001241  | 9.01679297 | 9.86780464 |
| PCDH7     | protocadheri  | 1.79388617 | 0.00305116 | 0.01876653 | 5.7707475  | 5.42524529 |
| PCDHA6    | protocadheri  | -1.539988  | 0.04043689 | 0.1243561  | 10.2591067 | 15.3954131 |
| PCDHGA7   | protocadheri  | -1.6010803 | 0.03059621 | 0.10182777 | 12.5433609 | 12.5906636 |
| PCDHGA9   | protocadheri  | -2.4378804 | 0.01164847 | 0.05095071 | 1.82339591 | 2.78427683 |
| PCDHGB2   | protocadheri  | -2.0171157 | 0.00213784 | 0.01423659 | 6.73253875 | 4.52444985 |
| PCDHGB5   | protocadheri  | -2.1293685 | 0.00109348 | 0.00850608 | 5.47018773 | 4.93390232 |
| PCDHGB7   | protocadheri  | -3.865819  | 0.00426995 | 0.02410191 | 1.2423137  | 1.33072054 |
| PCDHGC3   | protocadheri  | -1.7535573 | 1.12E-07   | 4.47E-06   | 130.062229 | 126.254671 |
| PCK1      | phosphoenol   | 7.82879702 | 0.00375256 | 0.02189021 | 0.10018659 | 0.10236312 |
| PCLO      | piccolo presy | 1.52511843 | 8.18E-05   | 0.00109072 | 27.8719089 | 26.552993  |
| PCOLCE    | procollagen ( | -2.5931911 | 5.69E-14   | 1.17E-11   | 110.325471 | 103.693839 |
| PCSK1     | proprotein cc | -2.2345792 | 5.05E-07   | 1.61E-05   | 10.2390693 | 11.4851419 |
| PCSK1N    | proprotein cc | 2.04335995 | 0.00311665 | 0.01907876 | 1.9235825  | 1.49450153 |
| PDCD1LG2  | programmec    | 1.97786281 | 0.02473459 | 0.08768473 | 0.88164198 | 0.8598502  |
| PDE3A     | phosphodies   | 1.61964708 | 0.01053359 | 0.04725028 | 2.54473935 | 3.1937293  |
| PDE4B     | phosphodies   | -2.5294664 | 0.00151471 | 0.01097969 | 12.3830623 | 13.4709864 |
| PDE4C     | phosphodies   | 4.71733807 | 5.01E-05   | 0.00073523 | 0.64119417 | 0.30708936 |
| PDE5A     | phosphodies   | -1.5534284 | 0.04582926 | 0.13575969 | 2.58481398 | 2.9275852  |
| PDE9A     | phosphodies   | -1.5831607 | 0.00195704 | 0.0133076  | 6.35182971 | 6.83785633 |
| PDGFB     | platelet-deri | -3.0056638 | 1.20E-06   | 3.29E-05   | 11.100674  | 8.82370083 |
| PDGFD     | platelet deri | 2.38105764 | 8.35E-06   | 0.00016579 | 1.42264956 | 1.94489926 |
| PDGFRA    | platelet-deri | -2.1201015 | 0.00366239 | 0.02143902 | 2.58481398 | 3.72601752 |
| PDGFRB    | platelet-deri | -2.1552198 | 1.41E-08   | 7.46E-07   | 22.1211987 | 23.2773732 |
| PDK1      | pyruvate deh  | -1.8149104 | 8.88E-08   | 3.64E-06   | 23.3034005 | 24.8742378 |
| PDK3      | pyruvate deh  | -1.5531287 | 0.00224615 | 0.01481256 | 32.9413503 | 36.4207976 |
| PDLIM1    | PDZ and LIM   | -1.5915315 | 1.73E-08   | 9.00E-07   | 109.203381 | 109.057667 |
| PDRG1     | p53 and DNA   | 1.68124991 | 0.00026742 | 0.00281051 | 21.7805643 | 22.8679207 |
| PDX1      | pancreatic ai | 2.19483817 | 0.0038168  | 0.02212903 | 0.58108221 | 0.79843233 |

|         |               |            |            |            |            |            |
|---------|---------------|------------|------------|------------|------------|------------|
| PDZD2   | PDZ domain    | -1.610397  | 0.00101025 | 0.00801736 | 34.8048208 | 34.4554258 |
| PDZRN3  | PDZ domain    | 1.55940053 | 0.00203756 | 0.01370976 | 5.81082213 | 5.13862856 |
| PEAR1   | platelet endo | 1.57768534 | 0.00199848 | 0.01349777 | 4.04753818 | 4.52444985 |
| PEPD    | peptidase D   | 1.52921442 | 0.00054387 | 0.00496203 | 36.2875824 | 37.3625383 |
| PER3    | period circad | -2.0779851 | 0.00569439 | 0.02993391 | 2.36440349 | 2.72285896 |
| PFKFB4  | 6-phosphofru  | -2.0991051 | 5.61E-11   | 6.29E-09   | 172.922052 | 178.21419  |
| PFKL    | phosphofruct  | -1.905334  | 3.23E-09   | 2.14E-07   | 113.371144 | 110.40886  |
| PFKP    | phosphofruct  | -1.5166932 | 3.30E-06   | 7.65E-05   | 290.200472 | 282.419845 |
| PGM1    | phosphogluc   | -1.5251575 | 5.64E-08   | 2.45E-06   | 163.885221 | 163.473901 |
| PGM2L1  | phosphogluc   | 1.74519089 | 0.00024054 | 0.00260085 | 5.95108336 | 6.34651336 |
| PGM5    | phosphogluc   | -2.4663871 | 0.00082212 | 0.00680768 | 2.04380641 | 1.96537188 |
| PHF13   | PHD finger p  | -1.6471167 | 7.92E-05   | 0.00106272 | 47.0876966 | 48.5815361 |
| PHF19   | PHD finger p  | -1.7030799 | 1.85E-07   | 6.85E-06   | 83.0146072 | 84.4086277 |
| PHLDA3  | pleckstrin ho | 2.10693196 | 7.26E-10   | 5.88E-08   | 115.134428 | 112.230923 |
| PHLDB2  | pleckstrin ho | -1.6172088 | 0.00093774 | 0.00756533 | 218.72736  | 222.701201 |
| PHLPP1  | PH domain a   | -1.7713545 | 5.01E-07   | 1.60E-05   | 29.8756407 | 30.1357022 |
| PHPT1   | phosphohisti  | 1.9336501  | 2.49E-07   | 8.71E-06   | 48.5904954 | 46.247657  |
| PI15    | peptidase inl | 2.10357626 | 1.27E-05   | 0.0002389  | 3.64679182 | 3.95121638 |
| PI3     | peptidase inl | 3.66762908 | 0.01289984 | 0.05500766 | 0.6812688  | 0.53228822 |
| PIANP   | PILR alpha as | -2.392967  | 9.48E-05   | 0.00123266 | 4.32806062 | 3.25514718 |
| PICK1   | protein inter | 1.51258226 | 0.0001415  | 0.00170309 | 19.0354518 | 19.6332462 |
| PID1    | phosphotyros  | 2.21849354 | 0.00336789 | 0.02014935 | 1.44268687 | 1.47402891 |
| PIDD1   | p53-induced   | 1.61144286 | 3.64E-05   | 0.0005686  | 20.8187731 | 19.3875747 |
| PIEZO2  | piezo-type m  | -2.9688958 | 3.59E-05   | 0.00056403 | 4.46832185 | 4.01263425 |
| PIF1    | PIF1 5'-to-3' | -1.7705465 | 1.24E-05   | 0.00023339 | 11.2008606 | 12.7749172 |
| PIGN    | phosphatidyl  | -1.5447556 | 0.00061469 | 0.00545788 | 18.5144816 | 22.3970504 |
| PIK3R3  | phosphoinosi  | 1.74927378 | 1.95E-06   | 4.97E-05   | 9.75817372 | 9.58118791 |
| PIM1    | Pim-1 proto-  | -2.0892167 | 3.91E-12   | 5.46E-10   | 20.9189597 | 23.2159553 |
| PINLYP  | phospholipas  | 3.74465003 | 0.00111068 | 0.00860232 | 0.30055977 | 0.26614411 |
| PINX1   | PIN2/TERF1    | 1.60708981 | 0.00156075 | 0.01121083 | 6.03123263 | 6.42840386 |
| PITPNM2 | phosphatidyl  | -1.6695856 | 0.00027207 | 0.00284883 | 24.9063859 | 27.4537884 |
| PKIB    | protein kinas | -1.5202989 | 0.04228645 | 0.12836584 | 8.97671833 | 8.80322821 |
| PKMYT1  | protein kinas | -1.5893064 | 3.12E-05   | 0.00049909 | 24.2852291 | 25.2017998 |
| PKN3    | protein kinas | -1.7675657 | 7.91E-08   | 3.29E-06   | 29.6752675 | 26.3277941 |
| PLA2G4C | phospholipas  | 2.89363356 | 0.01230664 | 0.05311383 | 0.66123148 | 0.20472624 |
| PLA2R1  | phospholipas  | -1.9703382 | 0.00026724 | 0.00281051 | 5.97112067 | 5.36382742 |
| PLAC8   | placenta-spe  | -2.3340499 | 6.66E-08   | 2.84E-06   | 6.57224021 | 6.71502059 |
| PLAT    | plasminogen   | 1.6133159  | 2.17E-08   | 1.09E-06   | 334.723392 | 333.376205 |
| PLAU    | plasminogen   | -1.5116237 | 0.02387813 | 0.08571754 | 6.85276265 | 6.20320499 |
| PLCD1   | phospholipas  | -1.9415614 | 5.07E-06   | 0.00010975 | 11.4012338 | 11.7308134 |
| PLCE1   | phospholipas  | -1.9978932 | 5.66E-06   | 0.00012032 | 27.0503789 | 28.0884398 |
| PLCG2   | phospholipas  | 1.87163393 | 0.00058874 | 0.00527347 | 2.20410495 | 2.17009812 |
| PLCL1   | phospholipas  | 3.06121552 | 0.00140886 | 0.01042993 | 0.28052245 | 0.69606921 |

|          |               |            |            |            |            |            |
|----------|---------------|------------|------------|------------|------------|------------|
| PLCL2    | phospholipas  | 1.79200818 | 0.00023195 | 0.00251945 | 6.21156849 | 4.99532019 |
| PLCXD2   | phosphatidyl  | 2.45523669 | 0.00294645 | 0.01821688 | 2.34436617 | 2.17009812 |
| PLCXD3   | phosphatidyl  | 2.29222684 | 0.00365854 | 0.02143413 | 1.26235102 | 0.92126807 |
| PLEK2    | pleckstrin 2  | -2.5778746 | 0.00613205 | 0.0317543  | 1.76328396 | 1.5559194  |
| PLEKHA2  | pleckstrin ho | -1.6805658 | 0.00345591 | 0.02050383 | 26.3891474 | 26.0821226 |
| PLEKHA7  | pleckstrin ho | 2.07424422 | 2.45E-07   | 8.57E-06   | 4.64865771 | 4.4016141  |
| PLGRKT   | plasminogen   | 1.61959828 | 9.15E-05   | 0.00119651 | 9.65798713 | 9.99064039 |
| PLIN2    | perilipin 2   | -1.6305473 | 9.23E-10   | 7.35E-08   | 617.550132 | 630.208777 |
| PLIN4    | perilipin 4   | -2.7784502 | 3.63E-08   | 1.69E-06   | 11.7418682 | 10.5229286 |
| PLK1     | polo-like kin | -1.6660463 | 0.00027493 | 0.00287032 | 153.746339 | 145.846972 |
| PLK2     | polo-like kin | 1.53488589 | 6.79E-08   | 2.88E-06   | 112.6498   | 112.660848 |
| PLK3     | polo-like kin | 2.89084165 | 1.98E-09   | 1.41E-07   | 13.6454134 | 16.4804621 |
| PLK4     | polo-like kin | -1.7778593 | 3.00E-05   | 0.00048377 | 29.6552302 | 26.4915751 |
| PLOD1    | procollagen-l | -1.7875675 | 3.62E-08   | 1.69E-06   | 468.01163  | 463.930127 |
| PLOD2    | procollagen-l | -1.7260608 | 2.19E-07   | 7.77E-06   | 176.348433 | 169.349544 |
| PLP1     | proteolipid p | -2.0583822 | 9.56E-06   | 0.00018696 | 25.1067591 | 27.0033907 |
| PLXDC2   | plexin domai  | -2.2923369 | 5.13E-06   | 0.00011076 | 11.5815696 | 14.8426522 |
| PLXNA1   | plexin A1     | -1.5682891 | 0.00021671 | 0.002388   | 110.70618  | 112.558485 |
| PLXND1   | plexin D1     | -1.8554241 | 1.72E-06   | 4.47E-05   | 85.0383763 | 81.3377341 |
| PNP      | purine nucle  | 1.6047551  | 7.69E-05   | 0.00103744 | 45.4045619 | 42.3578585 |
| POLA1    | polymerase (  | -1.685777  | 4.24E-05   | 0.00064097 | 61.7349758 | 61.049364  |
| POLB     | polymerase (  | 1.54102336 | 0.00025589 | 0.00272339 | 18.9953772 | 18.6710329 |
| POLE     | polymerase (  | -1.5325114 | 5.58E-05   | 0.00079975 | 67.6660219 | 70.4462983 |
| POLE2    | polymerase (  | -2.204904  | 4.92E-06   | 0.000107   | 7.71436731 | 7.34967192 |
| POLE4    | polymerase (  | 1.50615978 | 0.00126008 | 0.00955692 | 20.498176  | 21.0663298 |
| POLN     | polymerase (  | 2.79611506 | 0.0188824  | 0.07234894 | 0.36067172 | 0.40945247 |
| POLR2L   | polymerase (  | 1.55515212 | 0.00096207 | 0.00772423 | 64.2596779 | 61.1107819 |
| POP4     | POP4 homok    | 1.62118072 | 0.00017762 | 0.00203807 | 25.3071323 | 25.5703071 |
| POP5     | POP5 homok    | 1.52547202 | 0.00091532 | 0.00743686 | 24.5056395 | 23.6049352 |
| PPAPDC1A | phosphatidic  | 2.30703784 | 3.91E-05   | 0.00060377 | 1.9235825  | 2.14962549 |
| PPEF1    | protein phos  | 2.90772954 | 0.00366318 | 0.02143902 | 0.42078367 | 0.32756198 |
| PPFIA4   | protein tyros | -3.1835557 | 6.81E-11   | 7.41E-09   | 24.8863486 | 25.5703071 |
| PPM1D    | protein phos  | 2.14132412 | 6.87E-14   | 1.38E-11   | 27.8518716 | 25.8159785 |
| PPM1H    | protein phos  | 1.60312136 | 0.00048661 | 0.00455337 | 5.30988919 | 6.36698598 |
| PPP1R15A | protein phos  | 2.31553382 | 0.00044332 | 0.00420623 | 59.1902365 | 57.9989431 |
| PPP1R1B  | protein phos  | -5.8834968 | 1.09E-15   | 3.17E-13   | 6.43197898 | 6.75596584 |
| PPP1R3B  | protein phos  | -1.5588547 | 0.00672427 | 0.03403833 | 11.541495  | 11.7717587 |
| PPP1R3E  | protein phos  | -1.7419593 | 0.00021943 | 0.00241475 | 6.37186703 | 7.69770653 |
| PPP1R3F  | protein phos  | 1.5738883  | 5.04E-05   | 0.00073822 | 9.11697955 | 8.68039247 |
| PPP2R3B  | protein phos  | -1.6825797 | 0.00011283 | 0.00141917 | 15.2283615 | 16.54188   |
| PPP4R3A  | protein phos  | 1.61872674 | 5.77E-08   | 2.50E-06   | 56.2848254 | 55.6241187 |
| PRAMEF12 | PRAME fami    | 17.816241  | 2.18E-06   | 5.39E-05   | 0.12022391 | 0.10236312 |
| PRAMEF7  | PRAME fami    | 97.1564453 | 4.95E-06   | 0.0001076  | 0.02003732 | 0          |

|            |                |            |            |            |            |            |
|------------|----------------|------------|------------|------------|------------|------------|
| PRB1       | proline-rich p | 4.62121111 | 0.00018531 | 0.0021093  | 0.3406344  | 0.32756198 |
| PRB2       | proline-rich p | 4.12567296 | 0.00179921 | 0.01255047 | 0.32059708 | 0.22519886 |
| PRC1       | protein regul  | -1.8235054 | 2.24E-06   | 5.53E-05   | 171.559514 | 171.601532 |
| PRDM1      | PR domain c    | 1.60818631 | 1.14E-06   | 3.17E-05   | 21.2796314 | 20.513569  |
| PRDM8      | PR domain c    | -3.2639929 | 0.0002246  | 0.00245453 | 2.10391836 | 2.53860534 |
| PRICKLE1   | prickle homo   | -1.6758343 | 8.17E-06   | 0.00016401 | 17.1719813 | 17.2788944 |
| PRKAB1     | protein kinas  | 1.52953961 | 0.0006347  | 0.00558341 | 23.8243707 | 26.6348835 |
| PRKAR2A-AS | PRKAR2A an     | 1.68023843 | 0.01861554 | 0.07160327 | 1.32246297 | 1.59686465 |
| PRR11      | proline rich 1 | -2.1241382 | 6.90E-09   | 4.05E-07   | 118.941518 | 119.478232 |
| PRR20A     | proline rich 2 | 3.05647553 | 0.01452235 | 0.05988369 | 0.38070904 | 0.24567148 |
| PRR20B     | proline rich 2 | 3.05649093 | 0.01461781 | 0.06019023 | 0.38070904 | 0.24567148 |
| PRR20C     | proline rich 2 | 3.05649516 | 0.01464417 | 0.06024655 | 0.38070904 | 0.24567148 |
| PRR20D     | proline rich 2 | 3.05649471 | 0.01464136 | 0.06024655 | 0.38070904 | 0.24567148 |
| PRR20E     | proline rich 2 | 3.05649869 | 0.01466619 | 0.06028495 | 0.38070904 | 0.24567148 |
| PRR34-AS1  | PRR34 antise   | 2.36497805 | 4.53E-05   | 0.00067481 | 2.84529911 | 2.21104336 |
| PRR36      | proline rich 3 | -2.2806422 | 0.00886404 | 0.04166273 | 2.32432885 | 2.25198861 |
| PRR7       | proline rich 7 | -1.6172201 | 2.98E-06   | 7.03E-05   | 29.6953048 | 30.3813736 |
| PRR9       | proline rich 9 | 111.727263 | 4.06E-09   | 2.60E-07   | 0          | 0          |
| PRRG2      | proline rich C | 2.14421592 | 0.01023431 | 0.04627618 | 0.88164198 | 0.90079544 |
| PRRT2      | proline-rich t | -1.6268896 | 0.00187237 | 0.01293412 | 10.0587335 | 10.4205655 |
| PRRX1      | paired relate  | -2.9597428 | 3.16E-06   | 7.39E-05   | 67.5257606 | 65.9423211 |
| PRSS23     | protease; sei  | -1.5664383 | 3.00E-08   | 1.44E-06   | 96.4796847 | 99.2717525 |
| PRSS33     | protease; sei  | -4.6529035 | 2.94E-16   | 9.32E-14   | 7.73440463 | 7.16541831 |
| PRSS35     | protease; sei  | 4.15042155 | 0.00032671 | 0.00327881 | 0.80149271 | 0.57323346 |
| PRSS53     | protease; sei  | -1.5269989 | 0.02427399 | 0.08652766 | 4.28798599 | 3.84885326 |
| PRTG       | protogenin     | -1.6205681 | 0.00186511 | 0.01289862 | 17.6729142 | 15.9686465 |
| PSIP1      | PC4 and SFR    | -1.58685   | 1.11E-07   | 4.45E-06   | 234.737177 | 237.973778 |
| PSMC4      | proteasome     | 1.50306464 | 0.00024353 | 0.00262325 | 165.227722 | 155.530523 |
| PSPH       | phosphoserin   | 1.58238758 | 2.77E-05   | 0.00045144 | 19.7968699 | 20.9639667 |
| PSRC1      | proline/serin  | -1.7864727 | 1.06E-08   | 5.88E-07   | 31.9995964 | 31.0569702 |
| PSTK       | phosphoseryl   | 2.27817146 | 0.0001198  | 0.00148577 | 2.2642169  | 1.74017302 |
| PTCH1      | patched 1      | -1.7239974 | 0.00158082 | 0.0113094  | 20.117467  | 21.9466527 |
| PTCHD4     | patched dom    | 2.34184517 | 7.86E-13   | 1.26E-10   | 7.65425536 | 6.32604074 |
| PTGER4P2-C | PTGER4P2-C     | 2.03265397 | 0.00925627 | 0.04284327 | 0.94175393 | 0.81890495 |
| PTGES      | prostaglandin  | -1.769168  | 1.69E-05   | 0.00030408 | 40.9562774 | 39.9216163 |
| PTH1H      | parathyroid h  | 1.54895416 | 0.00029376 | 0.00302705 | 8.45574807 | 8.86464608 |
| PTK2B      | protein tyros  | 1.81155855 | 0.0022323  | 0.01473482 | 2.30429154 | 2.45671485 |
| PTK7       | protein tyros  | -1.5617044 | 3.71E-08   | 1.72E-06   | 63.3379613 | 61.4997617 |
| PTN        | pleiotrophin   | -2.4735638 | 0.00101287 | 0.00803251 | 3.00559766 | 2.29293386 |
| PTP4A1     | protein tyros  | 2.21026482 | 1.30E-16   | 4.51E-14   | 137.195514 | 147.70998  |
| PTPRB      | protein tyros  | -2.1452468 | 0.00020723 | 0.00231088 | 13.0843685 | 13.1434244 |
| PTPRD      | protein tyros  | -1.6647078 | 0.00464404 | 0.02567194 | 6.59227752 | 6.69454796 |
| PTPRH      | protein tyros  | -2.0560799 | 8.41E-10   | 6.77E-08   | 13.3448536 | 14.2080009 |



|           |                |            |            |            |            |            |
|-----------|----------------|------------|------------|------------|------------|------------|
| PTPRJ     | protein tyros  | -1.6547839 | 0.00025116 | 0.00268576 | 75.8612848 | 78.676293  |
| PTPRN     | protein tyros  | 2.21764087 | 1.18E-12   | 1.79E-10   | 7.31362096 | 8.107159   |
| PTPRZ1    | protein tyros  | -2.1350904 | 0.00050966 | 0.00472459 | 6.91287461 | 6.96069207 |
| PTRH2     | peptidyl-tRN   | 1.50658205 | 0.00046012 | 0.00434538 | 21.4800046 | 21.004912  |
| PVRL4     | poliovirus rec | 7.57642445 | 9.97E-19   | 4.59E-16   | 2.24417958 | 1.67875515 |
| PVT1      | Pvt1 oncogere  | 1.9565188  | 0.00058231 | 0.00523233 | 2.90541107 | 3.43940079 |
| PXDN      | peroxidasin    | -1.7555556 | 9.00E-09   | 5.07E-07   | 153.185294 | 149.859606 |
| QPR7      | quinolinate p  | -1.8467357 | 0.02459443 | 0.08729643 | 2.24417958 | 2.21104336 |
| QRFPR     | pyroglutamy    | -1.7626289 | 0.00026615 | 0.00280584 | 6.51212825 | 6.18273237 |
| QRICH2    | glutamine ric  | 1.63091542 | 0.04424081 | 0.13211983 | 1.3625376  | 1.04410381 |
| RAB27A    | RAB27A; me     | -1.6561741 | 0.00208056 | 0.01393708 | 7.95481513 | 8.08668638 |
| RAB31     | RAB31; merr    | -1.8917293 | 3.64E-07   | 1.21E-05   | 25.4874681 | 26.9624455 |
| RAB39B    | RAB39B; me     | 2.41657154 | 5.48E-05   | 0.00078799 | 1.82339591 | 2.067735   |
| RAB3A     | RAB3A; men     | 1.5202484  | 0.00233098 | 0.01521706 | 11.0205247 | 10.2158392 |
| RAB4B     | RAB4B; men     | 1.85505358 | 0.04235936 | 0.12848612 | 10.8602262 | 3.35751029 |
| RABGGTA   | Rab geranyl    | 1.61736487 | 9.67E-05   | 0.00124968 | 19.3760862 | 21.1891656 |
| RABIF     | RAB interact   | 1.60778514 | 0.00019433 | 0.00219444 | 16.2302273 | 16.869442  |
| RAC2      | ras-related C  | -1.9517271 | 0.00733734 | 0.03631316 | 1.88350786 | 2.08820762 |
| RAC3      | ras-related C  | -2.7767624 | 4.32E-11   | 4.96E-09   | 9.81828567 | 8.02526851 |
| RAD51AP1  | RAD51 assoc    | -1.5234568 | 0.00014597 | 0.00175107 | 22.6221317 | 20.3088428 |
| RAD51C    | RAD51 paral    | 1.51671752 | 2.44E-05   | 0.00040699 | 26.9902669 | 24.6695116 |
| RAD54L    | RAD54-like (   | -1.7269001 | 5.11E-07   | 1.62E-05   | 28.3127299 | 27.9860767 |
| RAPGEF3   | Rap guanine    | -2.1299304 | 1.81E-09   | 1.33E-07   | 13.6454134 | 15.1497416 |
| RAPGEFL1  | Rap guanine    | -1.5231685 | 0.01066634 | 0.04763587 | 12.4832489 | 10.9323811 |
| RARRES3   | retinoic acid  | -1.9858215 | 0.03998968 | 0.1234871  | 1.2423137  | 1.37166579 |
| RASA4     | RAS p21 prot   | -1.9940954 | 1.77E-07   | 6.60E-06   | 15.3085107 | 18.8143412 |
| RASA4B    | RAS p21 prot   | -1.8827728 | 5.07E-05   | 0.00074023 | 43.2806062 | 38.4475874 |
| RASEF     | RAS and EF-l   | 1.73129487 | 0.02231353 | 0.08167584 | 1.703172   | 1.33072054 |
| RASL11A   | RAS-like; fan  | 2.52204296 | 0.00011908 | 0.00148054 | 1.12208979 | 1.47402891 |
| RASSF4    | Ras associati  | -1.5670875 | 0.0055136  | 0.02934066 | 6.75257606 | 6.32604074 |
| RASSF8    | Ras associati  | -1.7215295 | 4.18E-05   | 0.00063507 | 405.575348 | 413.096602 |
| RBM14-RBM | RBM14-RBM      | 1.51264399 | 0.00474342 | 0.02609982 | 10.5596664 | 6.039424   |
| RBM18     | RNA binding    | 1.61192138 | 1.29E-06   | 3.46E-05   | 32.7810518 | 30.9546071 |
| RBPI      | recombinatio   | -1.6362652 | 5.81E-09   | 3.54E-07   | 219.308442 | 219.691725 |
| RCAN2     | regulator of   | -3.5646229 | 0.0089444  | 0.04195744 | 0.64119417 | 1.04410381 |
| RCL1      | RNA termina    | 1.58418764 | 1.80E-05   | 0.00031886 | 27.310864  | 27.8632409 |
| RCOR2     | REST corepre   | -2.0286443 | 0.043184   | 0.1301932  | 0.96179125 | 1.14646693 |
| RECK      | reversion-inc  | -1.5308599 | 0.01248796 | 0.05371746 | 13.625376  | 14.474145  |
| RFX2      | regulatory fa  | -1.9639373 | 4.55E-05   | 0.00067634 | 5.51026237 | 5.22051905 |
| RGAG4     | retrotranspo   | 1.7499346  | 0.0014071  | 0.01042772 | 2.2642169  | 2.90711257 |
| RGL1      | ral guanine r  | 1.80046311 | 4.64E-07   | 1.50E-05   | 21.6403031 | 20.9230215 |
| RGS10     | regulator of   | -1.5053485 | 0.00090709 | 0.0073972  | 15.9096303 | 16.4190442 |
| RGS2      | regulator of   | 1.71395181 | 2.88E-06   | 6.83E-05   | 9.97858421 | 8.9670092  |

|            |                |            |            |            |            |            |
|------------|----------------|------------|------------|------------|------------|------------|
| RGS20      | regulator of G | 1.81019819 | 0.00185552 | 0.01286768 | 3.30615742 | 2.68191371 |
| RHOB       | ras homolog    | 1.68265234 | 5.72E-07   | 1.76E-05   | 41.9381059 | 43.3200718 |
| RHOU       | ras homolog    | -1.5432897 | 0.00028626 | 0.00296871 | 15.3485854 | 16.8080241 |
| RIMKLB     | ribosomal m    | 1.50731704 | 1.79E-06   | 4.62E-05   | 56.4651613 | 55.4603377 |
| RINL       | Ras and Rab    | 1.52816811 | 0.00098914 | 0.00790149 | 8.63608393 | 9.08984494 |
| RMI2       | RecQ media     | -2.3393507 | 1.33E-09   | 1.01E-07   | 23.4837363 | 22.4994135 |
| RN7SK      | RNA; 7SK sm    | 5.72123958 | 1.23E-06   | 3.35E-05   | 2.98556034 | 2.21104336 |
| RNA18S5    | RNA; 18S rib   | 1.51084006 | 0.00732491 | 0.03627078 | 6228.3798  | 5827.88038 |
| RNA5-8S5   | RNA; 5.8S rik  | 3.04660946 | 6.09E-08   | 2.63E-06   | 10.1388828 | 9.33551643 |
| RNASE4     | ribonuclease   | -2.034233  | 0.02995846 | 0.10028619 | 1.84343323 | 1.84253614 |
| RND1       | Rho family G   | 3.59335148 | 1.29E-05   | 0.00024167 | 0.76141807 | 0.47087035 |
| RND3       | Rho family G   | 1.52531116 | 0.00185732 | 0.01286772 | 28.7735882 | 30.524682  |
| RNF144A-AS | RNF144A an     | -1.836702  | 0.00301549 | 0.0185792  | 6.1113819  | 4.44255935 |
| RNF144B    | ring finger pr | 2.93586229 | 1.99E-05   | 0.00034523 | 1.00186589 | 0.8598502  |
| RNF157     | ring finger pr | -2.2492966 | 1.77E-09   | 1.31E-07   | 12.4431743 | 14.801707  |
| RNF165     | ring finger pr | -2.8411827 | 0.0010296  | 0.00813803 | 3.52656792 | 3.76696277 |
| RNF208     | ring finger pr | 1.59278359 | 0.03207544 | 0.10538889 | 1.3625376  | 1.45355629 |
| RNF25      | ring finger pr | 1.54352274 | 0.00178718 | 0.01248489 | 21.5000419 | 20.8001857 |
| RNFT2      | ring finger pr | 1.90645995 | 0.00225424 | 0.01485901 | 4.46832185 | 3.93074376 |
| ROBO4      | roundabout g   | -1.7391987 | 4.18E-09   | 2.65E-07   | 34.9050074 | 33.8207744 |
| ROMO1      | reactive oxyg  | 1.52555087 | 0.00093624 | 0.00755994 | 73.476844  | 65.9218485 |
| ROR1       | receptor tyro  | -1.8170747 | 0.00018795 | 0.0021308  | 12.2027265 | 10.2363119 |
| RORB       | RAR-related    | 1.69678311 | 0.01647813 | 0.0655217  | 2.76514984 | 3.93074376 |
| ROS1       | ROS proto-on   | -2.0722227 | 0.00392214 | 0.02260188 | 3.90727695 | 3.64412703 |
| RP9        | retinitis pign | 1.57302812 | 0.00254941 | 0.01638039 | 13.4851148 | 15.1906868 |
| RPL13AP20  | ribosomal pr   | 3.43006707 | 2.64E-12   | 3.92E-10   | 4.96925479 | 4.27877836 |
| RPL23AP7   | ribosomal pr   | 1.91409554 | 0.00160054 | 0.01142181 | 2.66496325 | 2.94805782 |
| RPL23AP82  | ribosomal pr   | 1.71711228 | 0.00027035 | 0.00283496 | 7.39377023 | 6.42840386 |
| RPL23AP87  | ribosomal pr   | 1.94852339 | 0.01665167 | 0.06611951 | 0.78145539 | 0.90079544 |
| RPL26L1    | ribosomal pr   | 1.56916573 | 0.00015241 | 0.00181607 | 28.9338868 | 29.7876675 |
| RPLP0P2    | ribosomal pr   | 2.20526301 | 0.02416545 | 0.08624637 | 0.72134344 | 0.59370609 |
| RPP40      | ribonuclease   | 1.500718   | 0.0140618  | 0.05854358 | 7.07317315 | 7.3291993  |
| RPPH1      | ribonuclease   | 2.05670045 | 0.0221997  | 0.08134943 | 1.0219032  | 0.96221332 |
| RPS27L     | ribosomal pr   | 3.12416141 | 1.83E-18   | 8.16E-16   | 105.396291 | 101.114289 |
| RPS6KL1    | ribosomal pr   | 1.92289622 | 0.0003054  | 0.00311991 | 2.46459008 | 2.68191371 |
| RPSAP52    | ribosomal pr   | 2.8733533  | 5.33E-05   | 0.00077052 | 3.2861201  | 2.88663995 |
| RRAD       | Ras-related g  | 16.0441317 | 3.84E-09   | 2.50E-07   | 0.24044781 | 0.02047262 |
| RRM1       | ribonucleotic  | -1.5188697 | 1.41E-05   | 0.00025954 | 112.509539 | 111.65769  |
| RRM2B      | ribonucleotic  | 2.56597687 | 9.82E-22   | 6.99E-19   | 62.6566924 | 65.5942865 |
| RRN3P1     | RRN3 homol     | 2.02775284 | 0.0089578  | 0.04200644 | 0.86160466 | 0.90079544 |
| RRN3P3     | RRN3 homol     | 1.50669271 | 0.03426864 | 0.11054752 | 2.14399299 | 2.68191371 |
| RTL1       | retrotranspo   | 2.37641768 | 0.00270632 | 0.01709562 | 1.00186589 | 1.2078848  |
| RTN4R      | reticulum 4 re | -1.7457783 | 0.01788758 | 0.06963013 | 3.24604547 | 2.86616732 |

|            |                |            |            |            |            |            |
|------------|----------------|------------|------------|------------|------------|------------|
| RTN4RL2    | reticulon 4 re | -2.1199642 | 9.00E-05   | 0.00118095 | 7.63421804 | 7.43156242 |
| RUNDC3A    | RUN domain     | 3.47055363 | 8.34E-07   | 2.45E-05   | 0.94175393 | 1.00315856 |
| RUNX1T1    | runt-related   | 2.10798744 | 0.00327401 | 0.01975757 | 0.88164198 | 1.31024792 |
| RUNX2      | runt-related   | -2.2368467 | 0.00029202 | 0.00301123 | 6.67242679 | 6.5512396  |
| RYR3       | ryanodine re   | 2.23128277 | 0.04806296 | 0.14087726 | 0.82153003 | 0.24567148 |
| S100A1     | S100 calciur   | -2.0963736 | 0.00641994 | 0.03289795 | 2.98556034 | 3.1937293  |
| S100A3     | S100 calciur   | -1.7957183 | 1.11E-05   | 0.00021243 | 29.7153421 | 26.4711025 |
| S100A6     | S100 calciur   | 1.53320163 | 0.00095321 | 0.0076617  | 1074.32083 | 1058.06614 |
| S1PR1      | sphingosine-   | 1.65717666 | 0.0005019  | 0.00466272 | 7.41380755 | 7.26778143 |
| S1PR2      | sphingosine-   | -1.7451555 | 0.00049435 | 0.00461056 | 13.7055253 | 12.8363351 |
| S1PR3      | sphingosine-   | 2.43546991 | 0.01852377 | 0.07132728 | 0.94175393 | 0.38897985 |
| SALL2      | spalt-like tra | -1.7209642 | 0.00027351 | 0.00285977 | 15.6090705 | 16.1324275 |
| SAMD12     | sterile alpha  | 1.50734349 | 0.00272791 | 0.01719392 | 5.550337   | 5.62997153 |
| SAMD14     | sterile alpha  | -1.513987  | 0.0016456  | 0.01166603 | 10.5396291 | 12.0993206 |
| SAMD5      | sterile alpha  | 2.239939   | 0.00090784 | 0.0073972  | 1.20223906 | 1.67875515 |
| SAT1       | spermidine/s   | 1.69995867 | 2.90E-06   | 6.86E-05   | 35.826724  | 34.3530626 |
| SBDSP1     | Shwachman-     | 1.52945071 | 0.00053376 | 0.00489801 | 20.7185865 | 18.8552865 |
| SCARA3     | scavenger re   | -3.1897281 | 1.19E-06   | 3.29E-05   | 9.17709151 | 8.92606395 |
| SCD        | stearoyl-CoA   | -2.5550383 | 2.79E-20   | 1.66E-17   | 471.197563 | 488.394912 |
| SCG5       | secretogranii  | 1.77474182 | 4.29E-05   | 0.00064829 | 6.2316058  | 6.039424   |
| SCMH1      | sex comb on    | -1.6200329 | 1.85E-06   | 4.76E-05   | 26.4492594 | 26.716774  |
| SCN2A      | sodium chan    | 1.82560189 | 2.80E-06   | 6.68E-05   | 7.17335974 | 6.18273237 |
| SCN9A      | sodium chan    | 2.91821695 | 0.01910052 | 0.07297628 | 0.38070904 | 0.24567148 |
| SCNM1      | sodium chan    | 1.75185979 | 0.00910999 | 0.04251031 | 23.0028407 | 25.9592869 |
| SCNN1A     | sodium chan    | -2.5838567 | 4.14E-05   | 0.00063244 | 5.83085945 | 5.50713579 |
| SCO2       | SCO2 cytochr   | 2.84416696 | 2.94E-08   | 1.43E-06   | 3.14585888 | 2.86616732 |
| SCUBE3     | signal peptid  | -1.7171435 | 0.00370543 | 0.02164854 | 12.0624653 | 13.4709864 |
| SDC3       | syndecan 3     | -3.6143207 | 6.04E-14   | 1.23E-11   | 102.030022 | 101.544214 |
| SDCBP2-AS1 | SDCBP2 antis   | 1.57418184 | 0.01419602 | 0.05886163 | 3.00559766 | 3.56223653 |
| SDSL       | serine dehyd   | 1.97789593 | 2.17E-05   | 0.00037179 | 7.41380755 | 6.67407534 |
| SEC11C     | SEC11 homol    | 1.85617459 | 1.43E-05   | 0.00026237 | 14.8276151 | 13.491459  |
| SELM       | selenoprotei   | 1.63842807 | 0.000202   | 0.00226844 | 15.9897795 | 14.9245427 |
| SEMA3A     | sema domain    | -1.9529197 | 4.80E-06   | 0.00010499 | 148.536636 | 141.424885 |
| SEMA3C     | sema domain    | -1.6394568 | 0.00306705 | 0.01884575 | 245.637478 | 250.605387 |
| SEMA3D     | sema domain    | -1.6596653 | 0.00029998 | 0.00308206 | 14.8075778 | 15.8048655 |
| SEMA3F     | sema domain    | -1.9866346 | 4.70E-09   | 2.94E-07   | 25.9884011 | 27.3718979 |
| SEMA4B     | sema domain    | -1.8181669 | 9.49E-10   | 7.49E-08   | 58.3286318 | 56.8524761 |
| SEMA4C     | sema domain    | -1.5139773 | 2.06E-05   | 0.00035442 | 42.0984045 | 41.2932821 |
| SEMA4G     | sema domain    | -1.6955768 | 0.00100262 | 0.00797786 | 14.9278017 | 18.0568541 |
| SEMA5A     | sema domain    | 1.83408746 | 0.00745491 | 0.03682493 | 2.32432885 | 2.29293386 |
| SEMA6A     | sema domain    | 2.36198521 | 6.22E-08   | 2.67E-06   | 5.69059823 | 4.56539509 |
| SEMA6B     | sema domain    | -4.3175197 | 1.62E-14   | 3.60E-12   | 84.7177792 | 83.5692501 |
| 1-Sep      | septin 1       | -1.9703736 | 0.04254791 | 0.12887361 | 1.94361982 | 1.84253614 |

|            |                |            |            |            |            |            |
|------------|----------------|------------|------------|------------|------------|------------|
| 5-Sep      | septin 5       | -1.6046433 | 0.0042795  | 0.02413418 | 7.97485244 | 6.87880158 |
| SEPT5-GP1B | NA             | -2.3227313 | 0.00187583 | 0.01294552 | 8.51586002 | 9.43787955 |
| SERPINA3   | serpin peptic  | -2.8933509 | 1.15E-07   | 4.58E-06   | 168.373581 | 166.114869 |
| SERPINA5   | serpin peptic  | -2.025986  | 1.64E-07   | 6.19E-06   | 33.6025818 | 33.9845554 |
| SERPINB2   | serpin peptic  | 3.34408903 | 5.41E-06   | 0.00011606 | 3.78705305 | 3.93074376 |
| SERPINB5   | serpin peptic  | 2.80257295 | 1.54E-06   | 4.03E-05   | 1.2423137  | 1.2078848  |
| SERPIND1   | serpin peptic  | 1.81364414 | 5.61E-05   | 0.00080315 | 4.54847112 | 4.17641524 |
| SERPINE1   | serpin peptic  | 2.22130101 | 5.01E-07   | 1.60E-05   | 9.85836031 | 10.6457643 |
| SERPINF1   | serpin peptic  | -3.5009573 | 1.08E-09   | 8.38E-08   | 11.7017935 | 12.2221564 |
| SERPINI1   | serpin peptic  | 2.23187427 | 6.63E-05   | 0.00091801 | 2.44455276 | 2.43624223 |
| SERTAD1    | SERTA doma     | 2.98205867 | 3.06E-08   | 1.46E-06   | 14.2665702 | 14.3513092 |
| SERTAD4    | SERTA doma     | -1.6550281 | 2.02E-05   | 0.00034925 | 23.7842961 | 26.1230679 |
| SESN1      | sestrin 1      | 2.91527253 | 3.31E-30   | 6.74E-27   | 14.0060851 | 15.0678511 |
| SESN2      | sestrin 2      | 3.60278348 | 2.83E-18   | 1.22E-15   | 14.4869807 | 14.2694187 |
| SESN3      | sestrin 3      | 1.51753554 | 0.00225745 | 0.01486641 | 7.83459122 | 9.02842707 |
| SETBP1     | SET binding p  | -1.6184661 | 0.01528523 | 0.06224044 | 7.49395682 | 6.63313009 |
| SFRP1      | secreted friz  | -1.7636131 | 1.89E-07   | 6.93E-06   | 379.326461 | 377.5766   |
| SFTA1P     | surfactant as  | 2.60822185 | 0.04419529 | 0.13203921 | 0.28052245 | 0.24567148 |
| SGCZ       | sarcoglycan;   | -1.6139547 | 0.03718989 | 0.11694702 | 1.98369445 | 2.4976601  |
| SGK3       | serum/glucoc   | 1.80332241 | 0.00607624 | 0.03153407 | 2.14399299 | 3.84885326 |
| SGSM2      | small G protei | -1.6824043 | 6.80E-06   | 0.00014083 | 70.9321047 | 71.4289842 |
| SH2B2      | SH2B adaptor   | -1.6153939 | 0.00197725 | 0.01340521 | 9.31735273 | 7.02210994 |
| SH2D1B     | SH2 domain     | -1.6817384 | 0.00244042 | 0.01576541 | 5.37000114 | 6.69454796 |
| SH2D2A     | SH2 domain     | 1.70384222 | 4.32E-07   | 1.41E-05   | 18.0936979 | 17.1765313 |
| SH3BP1     | SH3-domain     | -1.7856439 | 5.26E-08   | 2.31E-06   | 43.7615019 | 41.7436798 |
| SH3D21     | SH3 domain     | -2.0347311 | 1.31E-07   | 5.08E-06   | 9.19712882 | 9.49929742 |
| SH3GL3     | SH3-domain     | -1.8194337 | 0.03619783 | 0.11494828 | 2.24417958 | 2.23151599 |
| SHC2       | SHC (Src hom   | -1.8288816 | 0.0071182  | 0.03539478 | 3.12582156 | 2.66144109 |
| SHF        | Src homolog    | -1.7123205 | 0.00046809 | 0.00441184 | 11.7418682 | 11.1575799 |
| SIK1       | salt-inducibl  | 1.67668017 | 0.00053625 | 0.00491455 | 5.39003846 | 6.4693491  |
| SIPA1L2    | signal-induce  | 1.58919599 | 0.0003064  | 0.00312558 | 13.9459731 | 14.6788712 |
| SIRPA      | signal-regula  | -1.5192825 | 0.00017665 | 0.00203022 | 16.0098168 | 16.9103872 |
| SIRT4      | sirtuin 4      | 1.99085018 | 0.00311585 | 0.01907876 | 1.48276151 | 2.067735   |
| SIRT7      | sirtuin 7      | 1.65594972 | 0.00022366 | 0.00244621 | 19.7968699 | 20.349788  |
| SLAMF7     | SLAM family    | 3.22091835 | 1.04E-12   | 1.61E-10   | 3.74697841 | 4.23783311 |
| SLAMF9     | SLAM family    | 3.26276112 | 7.18E-06   | 0.00014738 | 1.20223906 | 0.94174069 |
| SLC12A7    | solute carrier | -1.6411269 | 1.21E-08   | 6.58E-07   | 77.0635239 | 77.0589558 |
| SLC12A8    | solute carrier | -1.911685  | 0.00132496 | 0.00994316 | 4.12768745 | 4.50397722 |
| SLC13A3    | solute carrier | 1.67858652 | 0.01836746 | 0.07085942 | 1.80335859 | 2.21104336 |
| SLC16A5    | solute carrier | -1.5746572 | 1.75E-06   | 4.52E-05   | 28.252618  | 27.4333158 |
| SLC22A18AS | solute carrier | -1.7281591 | 0.02371326 | 0.08530291 | 2.70503789 | 2.96853044 |
| SLC25A16   | solute carrier | 1.56527939 | 0.00681091 | 0.03435835 | 3.88723963 | 3.11183881 |
| SLC25A20   | solute carrier | 1.72511562 | 3.50E-06   | 8.05E-05   | 18.9352652 | 17.3403123 |

|            |                |            |            |            |            |            |
|------------|----------------|------------|------------|------------|------------|------------|
| SLC25A27   | solute carrier | -1.7354784 | 0.00215552 | 0.01431419 | 4.60858307 | 4.23783311 |
| SLC25A37   | solute carrier | -1.6535102 | 3.58E-08   | 1.68E-06   | 47.6487415 | 47.2508156 |
| SLC25A4    | solute carrier | 1.63225119 | 1.27E-06   | 3.44E-05   | 64.2797152 | 59.0225743 |
| SLC25A45   | solute carrier | 1.77333981 | 3.10E-05   | 0.00049642 | 5.47018773 | 5.71186202 |
| SLC27A1    | solute carrier | -1.8431516 | 5.06E-08   | 2.24E-06   | 29.4748943 | 30.0538117 |
| SLC29A1    | solute carrier | -1.619085  | 4.75E-06   | 0.00010446 | 28.6533643 | 25.734088  |
| SLC29A3    | solute carrier | 1.51326263 | 0.02294244 | 0.08313061 | 2.72507521 | 2.53860534 |
| SLC29A4    | solute carrier | -3.6848328 | 1.06E-08   | 5.88E-07   | 7.45388218 | 6.65360272 |
| SLC2A12    | solute carrier | -2.465566  | 9.22E-07   | 2.64E-05   | 11.8821294 | 12.897753  |
| SLC2A3     | solute carrier | -1.5332917 | 1.24E-06   | 3.40E-05   | 61.3743041 | 56.9343666 |
| SLC2A4RG   | SLC2A4 regul   | -1.5736754 | 2.17E-06   | 5.38E-05   | 65.5220289 | 63.3218252 |
| SLC30A1    | solute carrier | 1.90100119 | 1.13E-06   | 3.13E-05   | 20.6584745 | 22.3151599 |
| SLC31A2    | solute carrier | 1.6267456  | 0.00074135 | 0.0062812  | 4.68873234 | 5.73233465 |
| SLC38A3    | solute carrier | -1.911872  | 0.0238875  | 0.08571754 | 2.18406763 | 1.22835742 |
| SLC3A2     | solute carrier | 1.89748565 | 5.26E-07   | 1.67E-05   | 187.268771 | 187.140254 |
| SLC43A2    | solute carrier | 1.96405745 | 0.00145194 | 0.01064383 | 2.14399299 | 1.88348138 |
| SLC44A2    | solute carrier | -1.6202556 | 4.01E-07   | 1.32E-05   | 75.8612848 | 78.2463679 |
| SLC44A5    | solute carrier | 1.50674782 | 0.03257032 | 0.10640982 | 3.42638133 | 2.45671485 |
| SLC4A7     | solute carrier | -1.5136332 | 0.00207276 | 0.01389413 | 77.6245688 | 86.0669102 |
| SLC52A1    | solute carrier | 5.04231357 | 5.23E-06   | 0.00011262 | 0.44082099 | 0.18425361 |
| SLC6A10P   | solute carrier | -1.5563262 | 0.00076077 | 0.00640388 | 7.83459122 | 10.338675  |
| SLC6A12    | solute carrier | 72.512723  | 4.31E-09   | 2.72E-07   | 0.02003732 | 0.02047262 |
| SLC6A17    | solute carrier | 3.64546544 | 0.00010666 | 0.00135592 | 0.52097026 | 0.40945247 |
| SLC6A6     | solute carrier | -1.6216198 | 8.39E-07   | 2.45E-05   | 88.3846084 | 91.0008125 |
| SLC7A5     | solute carrier | 1.57228672 | 7.54E-07   | 2.25E-05   | 578.657698 | 587.154849 |
| SLC7A5P1   | solute carrier | 2.44297735 | 0.04212035 | 0.12804121 | 0.70130612 | 0.28661673 |
| SLC8A1     | solute carrier | -1.8011    | 5.92E-06   | 0.00012544 | 17.913362  | 17.626929  |
| SLC9A7     | solute carrier | -1.503291  | 3.62E-05   | 0.00056662 | 44.9837782 | 44.6303198 |
| SLCO4A1    | solute carrier | -1.6866319 | 8.53E-09   | 4.84E-07   | 153.105145 | 146.522568 |
| SLCO4A1-AS | SLCO4A1 ant    | -2.2902419 | 4.46E-06   | 9.90E-05   | 27.811797  | 28.0474945 |
| SLITRK6    | SLIT and NTF   | -1.5205767 | 0.00032487 | 0.00326955 | 123.449914 | 122.712907 |
| SMAD3      | SMAD family    | -1.5395344 | 3.16E-07   | 1.08E-05   | 161.661079 | 166.155814 |
| SMAD6      | SMAD family    | -1.6499521 | 0.00065435 | 0.00570001 | 15.5689959 | 15.9686465 |
| SMARCC2    | SWI/SNF rel    | -1.5682335 | 4.23E-06   | 9.50E-05   | 173.002201 | 169.410961 |
| SMC2       | structural m   | -1.5667151 | 1.36E-05   | 0.00025198 | 104.113903 | 109.200975 |
| SMIM11     | NA             | 1.55329962 | 0.00093234 | 0.00754927 | 9.67802445 | 8.6189746  |
| SMIM4      | small integra  | 1.57725016 | 0.00107471 | 0.00840599 | 5.73067286 | 4.93390232 |
| SMKR1      | small lysine-  | 1.6876319  | 0.0208579  | 0.07786226 | 1.72320932 | 1.67875515 |
| SMN1       | survival of m  | 1.74462104 | 0.00241665 | 0.01566154 | 64.3197898 | 44.3232304 |
| SMO        | smoothened,    | -1.5498849 | 1.50E-05   | 0.00027447 | 31.4185142 | 28.7640364 |
| SMPDL3B    | sphingomyel    | 3.0558069  | 0.00126863 | 0.00961152 | 0.40074635 | 0.40945247 |
| SNAI2      | snail family   | 2.67236426 | 0.01529534 | 0.06224044 | 0.48089562 | 0.40945247 |
| SNAP25     | synaptosoma    | -2.2910012 | 7.86E-06   | 0.00015889 | 10.6398157 | 9.84733202 |

|         |                |            |            |            |            |            |
|---------|----------------|------------|------------|------------|------------|------------|
| SNAPC1  | small nuclea   | 1.62562392 | 0.00051062 | 0.00472828 | 44.0820989 | 42.5011669 |
| SNCG    | synuclein; ga  | -2.1147863 | 0.00173026 | 0.01213478 | 4.90914284 | 5.36382742 |
| SNED1   | sushi; nidoge  | -3.941014  | 3.46E-07   | 1.16E-05   | 13.8858612 | 13.4505138 |
| SNHG12  | small nucleo   | 1.58419832 | 0.01662916 | 0.06608537 | 10.7600396 | 11.751286  |
| SNHG15  | small nucleo   | 1.51374413 | 0.01427297 | 0.05904327 | 9.41753932 | 9.66307841 |
| SNHG9   | small nucleo   | 2.76159549 | 0.00188824 | 0.01300599 | 0.62115685 | 0.67559658 |
| SNORA57 | small nucleo   | 2.82560091 | 0.0116517  | 0.05095071 | 0.26048513 | 0.26614411 |
| SNORD3A | small nucleo   | 2.67113198 | 0.02553188 | 0.08990729 | 1.08201516 | 0.73701445 |
| SNTA1   | syntrophin; a  | -1.6723362 | 0.00061254 | 0.00544974 | 12.1826892 | 12.1402659 |
| SNTB1   | syntrophin; b  | -2.2723537 | 6.02E-05   | 0.00085246 | 48.690682  | 49.8303662 |
| SOBP    | sine oculis bi | -2.1916197 | 2.86E-06   | 6.81E-05   | 11.3411218 | 12.078848  |
| SOCS2   | suppressor o   | 1.77925617 | 6.22E-07   | 1.90E-05   | 11.6416816 | 8.72133771 |
| SOCS3   | suppressor o   | -1.8502589 | 1.60E-10   | 1.55E-08   | 23.2232512 | 22.8269755 |
| SOGA3   | SOGA family    | 2.27118084 | 0.00839627 | 0.04017973 | 1.00186589 | 0.49134297 |
| SORBS3  | sorbin and SI  | -1.751343  | 2.23E-09   | 1.53E-07   | 68.6879251 | 67.1706785 |
| SORCS1  | sortilin-relat | -5.734705  | 2.42E-11   | 2.96E-09   | 20.2777655 | 18.6710329 |
| SORCS2  | sortilin-relat | -2.3674223 | 1.18E-05   | 0.00022487 | 6.85276265 | 6.8992742  |
| SOX12   | SRY (sex det   | -1.5440472 | 3.68E-05   | 0.0005743  | 86.5411751 | 81.1944258 |
| SOX15   | SRY (sex det   | 2.11384588 | 0.0099661  | 0.04536149 | 0.98182857 | 0.7779597  |
| SOX18   | SRY (sex det   | -1.5911469 | 0.0016133  | 0.01149912 | 7.57410609 | 6.63313009 |
| SOX2    | SRY (sex det   | -2.2897774 | 7.94E-06   | 0.00015995 | 15.5088839 | 15.8458108 |
| SOX4    | SRY (sex det   | -1.734626  | 8.52E-05   | 0.00112707 | 41.1967252 | 43.3610171 |
| SOX6    | SRY (sex det   | 1.59364306 | 0.01589152 | 0.06389922 | 2.18406763 | 3.31656505 |
| SOX9    | SRY (sex det   | -1.9932394 | 4.19E-11   | 4.85E-09   | 31.4385515 | 29.9514485 |
| SP1     | Sp1 transcrip  | -1.5411389 | 0.00020431 | 0.00228362 | 125.553833 | 125.251512 |
| SPACA6P | sperm acros    | -1.51314   | 0.0042886  | 0.02415685 | 6.81268802 | 5.7732799  |
| SPAG1   | sperm associ   | 1.56639363 | 0.00028249 | 0.00293854 | 18.1538098 | 19.858445  |
| SPANXA1 | sperm protei   | -1.9557922 | 4.08E-05   | 0.00062552 | 10.5396291 | 9.76544153 |
| SPANXA2 | SPANX famil    | -1.9557922 | 4.08E-05   | 0.00062552 | 10.5396291 | 9.76544153 |
| SPATA6  | spermatoger    | -1.7918125 | 5.40E-08   | 2.37E-06   | 24.4655649 | 27.2900075 |
| SPATS2L | spermatoger    | -1.5005546 | 1.71E-05   | 0.00030669 | 84.3571075 | 78.6967657 |
| SPC24   | SPC24; NDC8    | -2.2048832 | 0.00014076 | 0.00170045 | 8.25537489 | 9.58118791 |
| SPC25   | SPC25; NDC8    | -1.7082723 | 0.00096206 | 0.00772423 | 7.99488976 | 8.31188524 |
| SPEG    | SPEG comple    | -1.5368393 | 0.00011    | 0.00139097 | 29.3546704 | 29.0301805 |
| SPHK1   | sphingosine l  | 1.89255313 | 1.31E-06   | 3.51E-05   | 12.1626518 | 15.722975  |
| SPIN4   | spindlin fami  | -1.5527025 | 0.00326207 | 0.0197149  | 14.4669434 | 15.7639203 |
| SPON2   | spondin 2; ex  | 3.17207647 | 1.12E-06   | 3.12E-05   | 7.29358364 | 5.83469777 |
| SPP1    | secreted pho   | -1.6503999 | 0.00055198 | 0.00501992 | 19.5363848 | 20.2064796 |
| SPRR2D  | small proline  | 3.04999694 | 0.00025559 | 0.0027223  | 0.72134344 | 0.7779597  |
| SPRY1   | sprouty RTK :  | -2.3601089 | 2.13E-07   | 7.59E-06   | 6.05126995 | 5.67091678 |
| SPRY4   | sprouty RTK :  | -1.8417975 | 3.74E-13   | 6.42E-11   | 72.595202  | 76.1376877 |
| SPTBN5  | spectrin; bet  | 1.93774297 | 6.85E-05   | 0.00094099 | 3.06570961 | 3.78743539 |
| SQSTM1  | sequestosom    | 1.85351964 | 7.27E-05   | 0.00098906 | 673.955181 | 644.846703 |

|            |               |            |            |            |            |            |
|------------|---------------|------------|------------|------------|------------|------------|
| SRA1       | steroid recep | 1.9983513  | 5.51E-07   | 1.71E-05   | 29.6552302 | 28.7026185 |
| SRCIN1     | SRC kinase si | -1.7624431 | 0.00190394 | 0.0130762  | 9.59787518 | 11.3213609 |
| SREBF1     | sterol regula | -2.1655172 | 5.81E-10   | 4.78E-08   | 162.602833 | 156.779353 |
| SREBF2     | sterol regula | -1.6719717 | 4.34E-08   | 1.97E-06   | 147.695069 | 148.610776 |
| SRGAP3     | SLIT-ROBO R   | 2.15853256 | 3.02E-10   | 2.71E-08   | 7.41380755 | 7.3291993  |
| SRGN       | serglycin     | -1.6214264 | 0.00163234 | 0.01160749 | 5.06944138 | 5.73233465 |
| SRP19      | signal recogn | 1.52426092 | 5.97E-05   | 0.00084694 | 35.3057538 | 32.2443824 |
| SRPX       | sushi-repeat  | -1.6889601 | 1.25E-10   | 1.24E-08   | 147.354434 | 143.8816   |
| SRPX2      | sushi-repeat  | -2.1000396 | 1.94E-09   | 1.40E-07   | 18.4343323 | 19.3466294 |
| SRRM3      | serine/argini | -1.7082489 | 6.30E-05   | 0.00088165 | 8.83645711 | 8.04574113 |
| SRSF8      | serine/argini | 1.5624967  | 1.39E-06   | 3.69E-05   | 38.9325083 | 42.112187  |
| SSC4D      | scavenger re  | 2.46477427 | 0.01895694 | 0.0725444  | 0.70130612 | 0.7779597  |
| SSFA2      | sperm specif  | -1.880053  | 3.64E-06   | 8.33E-05   | 504.058764 | 506.922637 |
| SSSCA1     | Sjogren synd  | 1.54248768 | 0.0042876  | 0.02415685 | 22.9226914 | 20.1245891 |
| ST3GAL5    | ST3 beta-gal  | -2.3369183 | 7.22E-14   | 1.43E-11   | 41.7577701 | 41.1499737 |
| ST6GALNAC2 | ST6 (alpha-N  | -3.1834258 | 0.00063418 | 0.00558225 | 2.84529911 | 2.21104336 |
| STAC2      | SH3 and cyst  | -2.1986494 | 0.01152976 | 0.05058825 | 1.56291078 | 1.12599431 |
| STARD4     | StAR-related  | -1.6076185 | 1.90E-07   | 6.93E-06   | 29.074148  | 27.0238633 |
| STARD4-AS1 | STARD4 anti:  | -2.1180685 | 0.00121188 | 0.0092852  | 10.2591067 | 10.8709632 |
| STARD8     | StAR-related  | -1.5906945 | 0.01575848 | 0.06352873 | 4.00746354 | 4.93390232 |
| STC2       | stanniocalcir | 1.63214137 | 0.0003217  | 0.00324641 | 29.5550436 | 27.7404052 |
| STMN1      | stathmin 1    | -1.7601078 | 1.10E-11   | 1.44E-09   | 267.077408 | 270.422887 |
| STMN2      | stathmin 2    | -4.6332968 | 0.00267864 | 0.01695837 | 1.04194052 | 1.31024792 |
| STON1      | stonin 1      | -1.7348546 | 0.0001756  | 0.00202466 | 13.304779  | 13.6347674 |
| STRA6      | stimulated b  | -3.2336288 | 9.51E-10   | 7.49E-08   | 164.125669 | 160.89435  |
| STX3       | syntaxin 3    | 1.76256872 | 3.29E-05   | 0.00052063 | 27.2106774 | 26.0207048 |
| SUGCT      | succinyl-CoA  | 2.21494136 | 1.90E-06   | 4.86E-05   | 3.52656792 | 3.02994831 |
| SULF1      | sulfatase 1   | -1.5501735 | 0.00047155 | 0.00442982 | 12.8238833 | 13.5733495 |
| SUN2       | Sad1 and UN   | -1.7711848 | 1.89E-08   | 9.75E-07   | 93.8748334 | 91.8811354 |
| SURF2      | surfeit 2     | 1.65416926 | 0.00012962 | 0.00158147 | 24.0648186 | 22.253742  |
| SUSD1      | sushi domair  | 1.5967905  | 0.02763798 | 0.09504559 | 1.9235825  | 2.00631713 |
| SUSD2      | sushi domair  | -2.625368  | 6.29E-11   | 6.90E-09   | 62.8370283 | 57.8965799 |
| SUSD6      | sushi domair  | 2.19857937 | 3.48E-10   | 3.07E-08   | 10.6398157 | 10.1134761 |
| SYNE2      | spectrin repe | -2.0309161 | 0.0020299  | 0.01366466 | 19.8569818 | 20.8820762 |
| SYNGAP1    | synaptic Ras  | -1.5463468 | 7.49E-05   | 0.00101216 | 19.3961235 | 16.1529001 |
| SYNGR1     | synaptogyrin  | -1.9005491 | 8.40E-07   | 2.45E-05   | 26.5895206 | 28.4774196 |
| SYNGR3     | synaptogyrin  | -1.61706   | 0.00918044 | 0.04269924 | 4.8690682  | 5.17957381 |
| SYNM       | synemin; inte | -1.509407  | 0.00031816 | 0.00322028 | 77.5243822 | 81.2558436 |
| SYP        | synaptophysi  | 4.79082444 | 2.17E-10   | 2.00E-08   | 1.84343323 | 0.83937757 |
| SYT3       | synaptotagm   | 1.64084422 | 0.02241368 | 0.08184543 | 1.64306005 | 2.12915287 |
| TAC1       | tachykinin; p | 21.9414333 | 9.46E-06   | 0.00018572 | 0          | 0.10236312 |
| TAF13      | TAF13 RNA p   | 1.77383956 | 1.92E-06   | 4.89E-05   | 17.7931381 | 18.6915055 |
| TAF3       | TAF3 RNA pc   | 1.55336713 | 4.57E-06   | 0.00010113 | 13.304779  | 13.6347674 |

|           |                |            |            |            |            |            |
|-----------|----------------|------------|------------|------------|------------|------------|
| TAGLN3    | transgelin 3   | 1.87367183 | 1.98E-05   | 0.00034403 | 8.85649442 | 9.99064039 |
| TANC2     | tetratricopep  | -1.8315271 | 1.40E-07   | 5.36E-06   | 56.765721  | 61.5611796 |
| TANGO2    | transport an   | 1.58950887 | 0.00027296 | 0.00285607 | 8.07503903 | 8.45519361 |
| TAPBP     | TAP binding    | -1.5177919 | 1.62E-05   | 0.00029302 | 77.6646434 | 73.2305751 |
| TARSL2    | threonyl-tRN   | 1.6440903  | 0.0001029  | 0.00131685 | 7.25350901 | 6.32604074 |
| TAX1BP3   | Tax1 (humar    | 1.52523868 | 4.43E-05   | 0.00066299 | 62.436282  | 60.2918769 |
| TBC1D3H   | TBC1 domair    | 710.807983 | 0.00024218 | 0.0026122  | 0          | 0          |
| TBX2-AS1  | TBX2 antiser   | -1.983804  | 0.02722316 | 0.09425589 | 1.62302273 | 1.76064564 |
| TCEA2     | transcription  | -1.5770599 | 1.19E-05   | 0.00022556 | 38.4916873 | 40.1672878 |
| TCEANC    | transcription  | 1.77902352 | 0.02984792 | 0.10003827 | 1.50279883 | 1.16693955 |
| TCEB2     | transcription  | 1.51542033 | 0.0050065  | 0.02722152 | 74.0980009 | 70.8148055 |
| TCEB3-AS1 | TCEB3 antise   | 2.65879664 | 0.00558717 | 0.0295446  | 0.30055977 | 0.47087035 |
| TCF7      | transcription  | -1.8489052 | 0.01624401 | 0.06491285 | 2.64492594 | 2.96853044 |
| TCF7L1    | transcription  | -1.7119413 | 0.01963742 | 0.07439169 | 3.06570961 | 2.51813272 |
| TCHH      | trichohyalin   | 3.21901655 | 1.31E-07   | 5.09E-06   | 1.90354518 | 1.10552168 |
| TCN2      | transcobalan   | -1.5647123 | 0.0061195  | 0.03170082 | 7.03309851 | 9.88827727 |
| TCTA      | T-cell leuken  | 1.51684402 | 3.47E-06   | 7.99E-05   | 25.1468337 | 26.0207048 |
| TCTN2     | tectonic fam   | -1.7371381 | 2.30E-05   | 0.00039101 | 13.9860478 | 13.2867328 |
| TEAD2     | TEA domain     | -1.6178279 | 4.78E-05   | 0.00070664 | 19.0154145 | 20.0631713 |
| TENM1     | teneurin trar  | -1.6991675 | 0.00512318 | 0.02770792 | 4.80895625 | 4.74964871 |
| TEX14     | testis expres  | 10.5083368 | 5.91E-06   | 0.00012536 | 0.22041049 | 0.02047262 |
| TEX9      | testis expres  | 1.78128873 | 0.00193175 | 0.01319168 | 2.2642169  | 2.17009812 |
| TF        | transferrin    | -2.5131469 | 0.00672837 | 0.03403833 | 1.52283615 | 1.35119317 |
| TFAP4     | transcription  | -1.5488238 | 4.00E-06   | 9.04E-05   | 28.252618  | 26.8396097 |
| TFEC      | transcription  | 6.02978248 | 0.00320723 | 0.01950609 | 0.14026122 | 0.12283574 |
| TFF2      | trefoil factor | -1.6543721 | 0.01065298 | 0.04760618 | 3.98742622 | 3.78743539 |
| TFPI      | tissue factor  | -1.8436924 | 0.00264882 | 0.01681443 | 7.61418073 | 8.82370083 |
| TFPI2     | tissue factor  | 2.340775   | 2.76E-11   | 3.34E-09   | 37.3295229 | 36.3798524 |
| TGFB1     | transforming   | -2.7343932 | 3.95E-09   | 2.55E-07   | 548.140863 | 538.737094 |
| TGFBR2    | transforming   | -1.5523467 | 0.00343851 | 0.02046538 | 124.091109 | 133.624815 |
| TGM2      | transglutami   | -2.1651922 | 2.10E-13   | 3.78E-11   | 894.205377 | 888.204781 |
| THBD      | thrombomoc     | 2.40278894 | 0.01122428 | 0.04958377 | 0.36067172 | 0.53228822 |
| THBS4     | thrombospor    | -1.8804526 | 0.04971392 | 0.14458079 | 1.46272419 | 1.51497416 |
| THRB      | thyroid horm   | -2.7432075 | 2.36E-14   | 4.95E-12   | 27.5713492 | 27.7813504 |
| THSD1     | thrombospor    | 2.2986308  | 0.03234318 | 0.10586189 | 0.52097026 | 0.3480346  |
| THSD4     | thrombospor    | -1.8853702 | 0.00015989 | 0.00188155 | 87.2024066 | 89.7519825 |
| TIAF1     | TGFB1-induc    | 3.50962253 | 0.03549018 | 0.11337508 | 2.54473935 | 1.6378099  |
| TIAM1     | T-cell lymph   | -2.3205762 | 4.44E-07   | 1.44E-05   | 46.105868  | 47.5783776 |
| TICRR     | TOPBP1-inte    | -1.684939  | 6.84E-05   | 0.00094099 | 25.5275428 | 24.8332926 |
| TIE1      | tyrosine kina  | -2.3278506 | 3.16E-06   | 7.39E-05   | 5.59041164 | 5.81422514 |
| TIGAR     | TP53 induce    | 2.95986303 | 2.85E-26   | 4.52E-23   | 33.6827311 | 30.5860999 |
| TIGD3     | tigger transp  | 1.76557677 | 0.04244045 | 0.12863438 | 0.74138075 | 1.00315856 |
| TIMM22    | translocase c  | 1.51161791 | 0.00054659 | 0.00498043 | 31.2782529 | 29.5624687 |



|              |                |            |            |            |            |            |
|--------------|----------------|------------|------------|------------|------------|------------|
| TIMP1        | TIMP metallo   | 1.52033062 | 0.00038517 | 0.00376996 | 153.906637 | 156.451791 |
| TIMP2        | TIMP metallo   | -1.7767024 | 8.83E-08   | 3.63E-06   | 274.691588 | 284.856087 |
| TK1          | thymidine kin  | -1.8159897 | 9.97E-11   | 1.04E-08   | 101.909798 | 96.2622768 |
| TLCD1        | TLC domain c   | 1.85976849 | 3.29E-06   | 7.64E-05   | 16.9716081 | 14.8221796 |
| TLL2         | tolloid-like 2 | 2.34365939 | 2.79E-06   | 6.68E-05   | 1.66309737 | 1.6378099  |
| TLR6         | toll-like rece | -1.6948073 | 0.00144183 | 0.0105915  | 14.5871673 | 15.4773036 |
| TLR8-AS1     | TLR8 antisen   | 3.97907225 | 0.00273292 | 0.01721026 | 0.10018659 | 0.24567148 |
| TM4SF18      | transmembr     | -1.8350664 | 6.35E-09   | 3.83E-07   | 19.6365713 | 18.9985948 |
| TMCC2        | transmembr     | 1.55870461 | 0.001273   | 0.00962415 | 6.81268802 | 6.85832895 |
| TMED7-TICAM1 | TMED7-TICAM    | 1.99436549 | 0.00192823 | 0.01317948 | 10.3392559 | 9.60166054 |
| TMEM107      | transmembr     | -1.7144972 | 0.00107062 | 0.00838317 | 8.51586002 | 8.06621376 |
| TMEM121      | transmembr     | -1.9508321 | 2.24E-05   | 0.00038205 | 11.8019801 | 14.310364  |
| TMEM123      | transmembr     | -1.5270064 | 1.53E-06   | 4.02E-05   | 250.546621 | 264.588189 |
| TMEM130      | transmembr     | -1.5737771 | 0.0275003  | 0.09482379 | 3.54660523 | 3.11183881 |
| TMEM154      | transmembr     | -1.7431663 | 0.00064264 | 0.00563242 | 6.2316058  | 7.53392554 |
| TMEM158      | transmembr     | -1.6320828 | 0.00234744 | 0.01529027 | 105.937299 | 111.452964 |
| TMEM161B-1   | TMEM161B a     | 1.7214714  | 0.01457378 | 0.06002629 | 2.86533643 | 2.29293386 |
| TMEM175      | transmembr     | 1.50648685 | 0.00189282 | 0.01301707 | 10.9804501 | 12.3449921 |
| TMEM182      | transmembr     | 1.5132347  | 0.02709397 | 0.09403705 | 1.94361982 | 2.47718747 |
| TMEM199      | transmembr     | 1.58451164 | 7.79E-06   | 0.00015765 | 26.7498191 | 25.5907797 |
| TMEM2        | transmembr     | 1.75732666 | 1.04E-06   | 2.92E-05   | 274.23073  | 284.037182 |
| TMEM200A     | transmembr     | -1.5004796 | 0.00709358 | 0.0352877  | 11.1407486 | 10.338675  |
| TMEM200B     | transmembr     | -2.3527649 | 2.53E-06   | 6.11E-05   | 12.423137  | 10.993799  |
| TMEM208      | transmembr     | 1.61847532 | 0.00062193 | 0.00550308 | 28.2325806 | 26.3687394 |
| TMEM217      | transmembr     | 2.62876023 | 0.02847442 | 0.09711718 | 0.28052245 | 0.26614411 |
| TMEM231      | transmembr     | -1.5262117 | 0.00026608 | 0.00280584 | 16.1100034 | 16.2962085 |
| TMEM234      | transmembr     | 1.66147166 | 0.01497729 | 0.06136901 | 3.66682914 | 3.97168901 |
| TMEM254-A1   | TMEM254 ar     | 2.22609016 | 0.04605329 | 0.13624777 | 0.50093294 | 0.45039772 |
| TMEM255B     | transmembr     | 1.64408553 | 0.0015425  | 0.01112458 | 4.90914284 | 4.70870346 |
| TMEM27       | transmembr     | 2.94574324 | 0.00050571 | 0.004695   | 0.6812688  | 0.67559658 |
| TMEM45A      | transmembr     | -1.6995653 | 2.65E-05   | 0.0004371  | 14.066197  | 14.9245427 |
| TMEM74B      | transmembr     | -3.2304315 | 0.00125567 | 0.00953814 | 2.2642169  | 1.9858445  |
| TMEM92       | transmembr     | -2.0100812 | 0.00086202 | 0.00708052 | 3.76701573 | 3.1937293  |
| TMPO         | thymopoietin   | -1.6971927 | 2.38E-06   | 5.81E-05   | 227.363444 | 227.225651 |
| TMPO-AS1     | TMPO antise    | -2.7301458 | 8.21E-06   | 0.00016401 | 6.83272534 | 7.00163732 |
| TMPRSS15     | transmembr     | -1.7392748 | 4.50E-08   | 2.00E-06   | 59.0099006 | 57.2619286 |
| TMTC4        | transmembr     | -1.5903659 | 0.00022932 | 0.00249661 | 18.2740337 | 17.626929  |
| TMX4         | thioredoxin-r  | -1.7920363 | 1.26E-06   | 3.43E-05   | 174.104253 | 174.426754 |
| TNC          | tenascin C     | -1.6499771 | 9.06E-05   | 0.00118738 | 639.190435 | 641.202576 |
| TNFAIP2      | tumor necros   | -2.6905159 | 1.03E-16   | 3.66E-14   | 137.536149 | 135.467351 |
| TNFAIP8L1    | tumor necros   | -1.8516183 | 6.53E-07   | 1.98E-05   | 27.0103043 | 25.7750333 |
| TNFRSF10B    | tumor necros   | 1.55201828 | 1.30E-08   | 6.91E-07   | 136.313872 | 137.064216 |
| TNFRSF11A    | tumor necros   | -2.1518418 | 1.52E-05   | 0.00027751 | 5.28985187 | 5.30240955 |

|            |                |            |            |            |            |            |
|------------|----------------|------------|------------|------------|------------|------------|
| TNFRSF11B  | tumor necro:   | -2.285137  | 7.44E-14   | 1.45E-11   | 20.8388104 | 21.92618   |
| TNFRSF12A  | tumor necro:   | 1.83568514 | 2.55E-05   | 0.00042269 | 111.3073   | 102.60879  |
| TNFRSF19   | tumor necro:   | -1.8808677 | 1.81E-05   | 0.00032071 | 38.2111649 | 41.190919  |
| TNFRSF1B   | tumor necro:   | -2.2159223 | 8.14E-05   | 0.00108658 | 7.71436731 | 7.51345291 |
| TNFRSF21   | tumor necro:   | -1.8164248 | 8.28E-06   | 0.00016478 | 352.316157 | 353.459849 |
| TNFSF15    | tumor necro:   | 2.56372336 | 0.00016094 | 0.00189084 | 0.94175393 | 0.69606921 |
| TNFSF9     | tumor necro:   | 1.83498971 | 3.82E-08   | 1.76E-06   | 28.7936255 | 31.2412238 |
| TNNT1      | troponin T ty  | -1.5992815 | 0.00028536 | 0.00296191 | 41.056464  | 44.3232304 |
| TNRC6C-AS1 | TNRC6C anti:   | -2.0976667 | 0.00456368 | 0.02533579 | 4.22787403 | 4.23783311 |
| TNS1       | tensin 1       | -1.5251265 | 0.00915428 | 0.04264715 | 4.30802331 | 4.66775821 |
| TNS2       | tensin 2       | -2.0853121 | 4.99E-08   | 2.21E-06   | 110.465732 | 114.708111 |
| TNS3       | tensin 3       | -2.503514  | 5.47E-10   | 4.59E-08   | 150.119584 | 163.125866 |
| TNXB       | tenascin XB    | -1.5559646 | 0.00144513 | 0.01059965 | 10.8001142 | 12.7749172 |
| TOB2P1     | transducer o   | 1.65985875 | 0.00125113 | 0.00951432 | 3.18593351 | 3.09136619 |
| TONSL      | tonsoku-like;  | -1.5841945 | 2.79E-05   | 0.00045366 | 52.2973992 | 50.1988734 |
| TOP2A      | topoisomera    | -2.5149158 | 2.43E-11   | 2.96E-09   | 499.30992  | 515.152631 |
| TOX2       | TOX high mo    | -3.9609673 | 4.18E-23   | 3.50E-20   | 26.1286623 | 28.3136386 |
| TP53I3     | tumor protei   | 2.61788796 | 1.97E-10   | 1.83E-08   | 40.615643  | 40.3515414 |
| TP53INP1   | tumor protei   | 3.16342528 | 2.51E-19   | 1.33E-16   | 7.97485244 | 7.77959702 |
| TP53TG1    | TP53 target :  | 2.19097293 | 9.19E-06   | 0.00018115 | 4.34809794 | 5.22051905 |
| TPPP       | tubulin polyn  | 3.26762664 | 0.00118447 | 0.00909479 | 0.50093294 | 0.38897985 |
| TPX2       | TPX2; microt   | -1.5459717 | 5.05E-05   | 0.00073826 | 239.886768 | 232.691841 |
| TRABD2B    | TraB domain    | -2.2314108 | 0.0037734  | 0.02198449 | 2.9454857  | 2.8456947  |
| TRAF1      | TNF receptor   | -1.5986006 | 0.0016789  | 0.01186218 | 11.0806367 | 11.2804157 |
| TRAF4      | TNF receptor   | 1.65153502 | 1.88E-05   | 0.00033127 | 75.2000533 | 76.178633  |
| TRAF5      | TNF receptor   | -1.5413581 | 0.00034253 | 0.00341358 | 19.5163474 | 19.5104104 |
| TRAM2-AS1  | TRAM2 antis    | -1.513017  | 0.03274507 | 0.10680934 | 3.88723963 | 4.36066886 |
| TRAPPC2B   | trafficking pr | 1.56903736 | 0.00405715 | 0.02314589 | 4.62862039 | 5.54808103 |
| TRAPPC2L   | trafficking pr | 1.68015254 | 0.00022006 | 0.00241987 | 9.71809908 | 9.15126281 |
| TRERF1     | transcription  | -1.5142639 | 0.00141508 | 0.01045972 | 23.6239976 | 26.225431  |
| TRIAP1     | TP53 regulat   | 2.06211176 | 9.46E-14   | 1.77E-11   | 36.8285899 | 33.4113219 |
| TRIB2      | tribbles pseu  | -2.6659378 | 1.03E-10   | 1.06E-08   | 80.1893454 | 77.8369155 |
| TRIL       | TLR4 interact  | -2.0539726 | 0.04622107 | 0.13663067 | 1.14212711 | 1.49450153 |
| TRIM22     | tripartite mo  | 2.11123289 | 6.68E-06   | 0.0001386  | 2.34436617 | 2.86616732 |
| TRIM3      | tripartite mo  | 1.53840763 | 3.41E-05   | 0.00053953 | 10.8802635 | 9.78591415 |
| TRIM35     | tripartite mo  | 1.62757605 | 2.91E-07   | 1.00E-05   | 17.5526903 | 19.2647389 |
| TRIM36     | tripartite mo  | 1.58780405 | 0.00100129 | 0.00797173 | 5.51026237 | 5.7732799  |
| TRIM43     | tripartite mo  | 451.507038 | 4.95E-07   | 1.59E-05   | 0          | 0          |
| TRIM48     | tripartite mo  | 8.6252592  | 0.00287746 | 0.01789902 | 0.02003732 | 0.02047262 |
| TRIM49     | tripartite mo  | 41.0844135 | 0.00587784 | 0.03068316 | 0          | 0.02047262 |
| TRIM49C    | tripartite mo  | 17.7614213 | 0.00137365 | 0.01023843 | 0.24044781 | 0.02047262 |
| TRIM49D2   | tripartite mo  | 25.335567  | 5.51E-07   | 1.71E-05   | 0          | 0.16378099 |
| TRIM53AP   | tripartite mo  | 4.22099066 | 0.00010954 | 0.00138633 | 0.64119417 | 0.3480346  |

|           |                |            |            |            |            |            |
|-----------|----------------|------------|------------|------------|------------|------------|
| TRIM64B   | tripartite mo  | 43.7996871 | 4.19E-05   | 0.00063507 | 0.06011195 | 0          |
| TRIM68    | tripartite mo  | 1.54601565 | 0.00042071 | 0.00404553 | 6.69246411 | 6.91974683 |
| TRIML2    | tripartite mo  | 2.61205164 | 7.15E-06   | 0.00014694 | 1.72320932 | 1.80159089 |
| TRIOBP    | TRIO and F-a   | -1.6150429 | 4.19E-05   | 0.00063507 | 209.309821 | 210.253846 |
| TRMT61A   | tRNA methyl    | 1.61497212 | 0.00030693 | 0.00312885 | 23.1431019 | 18.6710329 |
| TRO       | trophinin      | 1.71931034 | 0.02162745 | 0.07999295 | 1.56291078 | 1.37166579 |
| TRPM2     | transient rec  | 1.84336452 | 1.10E-05   | 0.00021078 | 8.73627052 | 10.2158392 |
| TRPM8     | transient rec  | -1.8348799 | 0.030402   | 0.10134711 | 2.02376909 | 1.92442663 |
| TSGA10    | testis specifi | 4.65322778 | 5.01E-05   | 0.00073523 | 0.20037318 | 0.38897985 |
| TSHZ1     | teashirt zinc  | -1.9450933 | 7.91E-05   | 0.00106267 | 62.9171776 | 58.654067  |
| TSPAN1    | tetraspanin 1  | 1.68199682 | 0.02086016 | 0.07786226 | 1.46272419 | 1.84253614 |
| TSPAN10   | tetraspanin 1  | 1.83736381 | 0.00047069 | 0.00442914 | 4.62862039 | 3.95121638 |
| TSPAN11   | tetraspanin 1  | 2.15580838 | 1.63E-11   | 2.04E-09   | 9.51772591 | 9.88827727 |
| TSPAN14   | tetraspanin 1  | -1.5026037 | 0.00013148 | 0.00160152 | 222.494376 | 218.954711 |
| TSPAN33   | tetraspanin 3  | 1.53459717 | 0.00306801 | 0.01884575 | 5.04940406 | 5.32288217 |
| TSPYL2    | TSPY-like 2    | 1.57345472 | 8.41E-05   | 0.00111745 | 11.6617189 | 11.5465598 |
| TSSC4     | tumor suppre   | 1.56052847 | 0.00015703 | 0.00185093 | 27.3910133 | 27.4333158 |
| TTC1      | tetratricopep  | 1.54543997 | 6.94E-06   | 0.00014345 | 72.0141198 | 72.80065   |
| TTC3P1    | tetratricopep  | 1.73233286 | 0.02177437 | 0.08039171 | 1.40261224 | 1.53544678 |
| TTPAL     | tocopherol (a  | 1.51181071 | 4.83E-07   | 1.56E-05   | 51.215384  | 56.5658594 |
| TUBB      | tubulin; beta  | -1.5082157 | 2.09E-05   | 0.00035919 | 1341.73887 | 1305.31402 |
| TUBB2A    | tubulin; beta  | 1.5853681  | 8.79E-05   | 0.00115701 | 18.8751533 | 17.6064564 |
| TUBB2B    | tubulin; beta  | -1.726179  | 0.00208112 | 0.01393708 | 7.15332242 | 8.16857687 |
| TUSC2     | tumor suppre   | 1.5814301  | 0.00022158 | 0.00243084 | 30.9376185 | 31.8554025 |
| TXNDC17   | thioredoxin c  | 1.64641785 | 2.68E-05   | 0.00043934 | 76.4624043 | 72.8825405 |
| TYRO3     | TYRO3 prote    | -1.8789925 | 6.80E-08   | 2.88E-06   | 41.2167625 | 37.8948265 |
| TYW1B     | tRNA-yW syr    | 1.63646706 | 0.00031751 | 0.00321593 | 5.37000114 | 5.32288217 |
| UACA      | uveal autoan   | -1.7508128 | 1.58E-07   | 5.96E-06   | 119.382339 | 123.142832 |
| UBA7      | ubiquitin-like | -2.202612  | 5.14E-06   | 0.0001109  | 10.5195918 | 7.82054227 |
| UBE2C     | ubiquitin-cor  | -2.1127014 | 1.06E-09   | 8.28E-08   | 107.299836 | 107.337966 |
| UBE2QL1   | ubiquitin-cor  | 2.23271984 | 0.0157032  | 0.06335967 | 0.66123148 | 0.47087035 |
| UCA1      | urothelial ca  | 4.69931248 | 1.42E-10   | 1.40E-08   | 115.094353 | 113.930151 |
| UCKL1-AS1 | UCKL1 antise   | 2.74378192 | 0.00051483 | 0.00476107 | 0.80149271 | 0.83937757 |
| UCN2      | urocortin 2    | -1.7638276 | 4.24E-06   | 9.51E-05   | 30.1160885 | 32.3262729 |
| UHRF1     | ubiquitin-like | -1.5809618 | 4.38E-05   | 0.00065802 | 144.709508 | 141.895755 |
| UNC5B-AS1 | UNC5B antis    | 6.89514325 | 0.00014069 | 0.00170045 | 0.14026122 | 0.10236312 |
| UNC80     | unc-80 homoc   | -2.5079076 | 0.01173906 | 0.05119135 | 1.08201516 | 1.06457643 |
| UPK1A-AS1 | UPK1A antise   | -4.2611316 | 3.07E-05   | 0.00049247 | 2.20410495 | 2.08820762 |
| UPK3B     | uroplakin 3B   | -2.231009  | 7.29E-05   | 0.00099037 | 9.29731541 | 6.9811647  |
| UQCRHL    | ubiquinol-cyt  | 1.7481585  | 0.0029276  | 0.01813966 | 4.08761281 | 3.84885326 |
| USP43     | ubiquitin spe  | -1.5921097 | 0.00070991 | 0.00607261 | 9.63794981 | 9.04889969 |
| VANGL2    | VANGL plana    | -1.518477  | 0.00062554 | 0.00552331 | 14.066197  | 16.1529001 |
| VCL       | vinculin       | -1.5912911 | 0.00015438 | 0.00183185 | 271.866327 | 282.174173 |

|            |                |            |            |            |            |            |
|------------|----------------|------------|------------|------------|------------|------------|
| VCX        | variable char  | 1.84107257 | 0.03451132 | 0.11104557 | 1.00186589 | 1.76064564 |
| VDR        | vitamin D (1;  | -1.5737128 | 2.15E-07   | 7.68E-06   | 50.2335555 | 52.8603145 |
| VGf        | VGf nerve g    | 2.333326   | 6.48E-20   | 3.55E-17   | 336.646975 | 335.648666 |
| VIM        | vimentin       | -1.5538982 | 9.67E-06   | 0.00018831 | 3682.23784 | 3643.67663 |
| VIT        | vitrin         | -7.5718917 | 0.00035788 | 0.00354176 | 1.42264956 | 1.35119317 |
| VLDLR      | very low den   | -1.7860927 | 6.99E-06   | 0.00014421 | 18.795004  | 21.1891656 |
| VPS33A     | vacuolar prot  | 1.50343064 | 1.34E-06   | 3.59E-05   | 36.5681048 | 38.8775125 |
| VPS37D     | vacuolar prot  | -1.6132075 | 0.00314374 | 0.01919626 | 5.73067286 | 5.36382742 |
| VSNL1      | visinin-like 1 | -1.5691811 | 0.00327467 | 0.01975757 | 6.43197898 | 7.20636356 |
| VWA1       | von Willebra   | -1.6387242 | 0.01034644 | 0.0466015  | 4.74884429 | 3.82838064 |
| VWA5B2     | von Willebra   | 2.7793537  | 0.0128269  | 0.05479502 | 0.3406344  | 0.20472624 |
| VWCE       | von Willebra   | 1.93786349 | 0.03170174 | 0.10453064 | 1.04194052 | 0.65512396 |
| WDFY3-AS2  | WDFY3 antis    | -1.775307  | 0.03816968 | 0.11928863 | 1.38257492 | 1.59686465 |
| WDHD1      | WD repeat a    | -1.8555439 | 0.00017265 | 0.00200005 | 20.2577282 | 23.5435173 |
| WDR25      | WD repeat d    | 1.56539844 | 0.00271183 | 0.01711167 | 5.61044896 | 5.85517039 |
| WDR63      | WD repeat d    | 2.51281597 | 0.00201886 | 0.01359679 | 0.64119417 | 0.79843233 |
| WDR66      | WD repeat d    | 2.42097908 | 0.03692942 | 0.11648438 | 0.66123148 | 0.55276084 |
| WDR76      | WD repeat d    | -1.7113266 | 1.12E-06   | 3.12E-05   | 23.6239976 | 23.2773732 |
| WHSC1      | Wolf-Hirsch    | -1.6310511 | 5.27E-05   | 0.00076217 | 225.580123 | 232.937513 |
| WIPF1      | WAS/WASL i     | -1.6668512 | 7.77E-08   | 3.25E-06   | 62.8771029 | 62.5848108 |
| WNT16      | wingless-typ   | -2.8361418 | 0.00675526 | 0.03416224 | 0.78145539 | 1.2078848  |
| WNT5A      | wingless-typ   | -1.5046536 | 0.00343817 | 0.02046538 | 139.860478 | 139.541403 |
| WNT9A      | wingless-typ   | 2.82309277 | 2.14E-06   | 5.37E-05   | 2.70503789 | 2.60002322 |
| WSCD1      | WSC domain     | 1.59909299 | 8.99E-08   | 3.67E-06   | 18.3942576 | 18.2001625 |
| WWC1       | WW and C2      | 1.73564845 | 2.90E-07   | 1.00E-05   | 12.6836221 | 12.7749172 |
| WWC3       | WWC family     | -1.5614973 | 4.19E-05   | 0.00063507 | 60.9735578 | 64.3454564 |
| WWTR1      | WW domain      | -1.6623755 | 1.27E-05   | 0.0002389  | 605.748151 | 640.834068 |
| XG         | Xg blood gro   | 1.78240278 | 5.51E-05   | 0.00079153 | 4.70876966 | 4.52444985 |
| XPC        | xeroderma p    | 1.59403578 | 7.36E-09   | 4.30E-07   | 74.8594189 | 80.8054459 |
| XRCC2      | X-ray repair c | -1.588075  | 0.0154145  | 0.06256682 | 15.3485854 | 15.9686465 |
| YJEFN3     | YjeF N-termi   | 1.54927456 | 0.02252296 | 0.08209071 | 2.32432885 | 2.00631713 |
| YRDC       | yrnC N(6)-th   | 1.55608225 | 1.03E-05   | 0.00019989 | 54.1408324 | 54.0886719 |
| ZAK        | sterile alpha  | -1.5698781 | 1.90E-06   | 4.86E-05   | 34.5844104 | 36.0318178 |
| ZBTB11-AS1 | ZBTB11 antis   | 1.58224957 | 2.98E-05   | 0.00048104 | 7.97485244 | 8.31188524 |
| ZBTB12     | zinc finger ai | -1.6632136 | 1.30E-05   | 0.00024167 | 14.1062717 | 14.3922545 |
| ZBTB37     | zinc finger ai | 1.86881302 | 0.02105461 | 0.07843092 | 2.76514984 | 1.76064564 |
| ZBTB46     | zinc finger ai | -1.8146806 | 0.00136063 | 0.01015732 | 10.8201516 | 10.0315856 |
| ZC2HC1C    | zinc finger; C | 2.21328648 | 0.03643436 | 0.11535794 | 0.42078367 | 0.40945247 |
| ZC3H10     | zinc finger C  | 1.5266799  | 0.00024187 | 0.0026113  | 8.87653174 | 8.76228296 |
| ZCCHC24    | zinc finger; C | -2.2597554 | 2.33E-09   | 1.59E-07   | 169.395484 | 172.666109 |
| ZEB1-AS1   | ZEB1 antiser   | -1.5493289 | 0.02248724 | 0.08200247 | 4.04753818 | 3.86932589 |
| ZFP36      | ZFP36 ring fi  | 1.67793528 | 0.00033325 | 0.00333973 | 10.3993679 | 11.8331765 |
| ZFP42      | ZFP42 zinc fi  | 1.58614723 | 2.67E-05   | 0.00043927 | 14.2064582 | 13.1229518 |

|            |                |            |            |            |            |            |
|------------|----------------|------------|------------|------------|------------|------------|
| ZFP69B     | ZFP69 zinc fi  | 1.61454306 | 0.00819564 | 0.03957846 | 4.38817258 | 4.9134297  |
| ZIC2       | Zic family m   | -1.7191594 | 0.00101533 | 0.00804302 | 11.5014204 | 11.1985252 |
| ZMAT3      | zinc finger; n | 1.79121546 | 3.00E-10   | 2.71E-08   | 34.1636267 | 37.4034836 |
| ZMIZ1      | zinc finger; N | -1.6104383 | 0.00059997 | 0.00536395 | 142.044545 | 143.267421 |
| ZMYM3      | zinc finger; N | -1.5241224 | 0.00025457 | 0.00271552 | 73.3365828 | 75.4416185 |
| ZMYND8     | zinc finger; N | -1.6020704 | 1.67E-06   | 4.35E-05   | 203.999932 | 200.693131 |
| ZNF10      | zinc finger pr | 1.97974036 | 2.24E-05   | 0.00038205 | 3.1658962  | 3.48034604 |
| ZNF114     | zinc finger pr | 26.5627238 | 5.52E-09   | 3.39E-07   | 0.16029854 | 0.20472624 |
| ZNF195     | zinc finger pr | 1.57086763 | 0.00034169 | 0.00340761 | 10.8401889 | 10.5434012 |
| ZNF208     | zinc finger pr | 1.61523622 | 0.04921323 | 0.14342286 | 2.42451544 | 2.55907797 |
| ZNF213-AS1 | ZNF213 anti    | 1.9060057  | 0.03433916 | 0.11069155 | 1.20223906 | 1.35119317 |
| ZNF219     | zinc finger pr | 1.53142937 | 0.00016621 | 0.00194308 | 20.0974297 | 19.2647389 |
| ZNF222     | zinc finger pr | 1.68526141 | 0.00954109 | 0.04391222 | 2.72507521 | 3.13231143 |
| ZNF235     | zinc finger pr | 1.65648063 | 0.0295674  | 0.09954288 | 2.72507521 | 3.33703767 |
| ZNF28      | zinc finger pr | 1.59031005 | 0.00091503 | 0.00743686 | 7.0130612  | 7.04258257 |
| ZNF280A    | zinc finger pr | 4.33521052 | 0.00863609 | 0.04092107 | 0.12022391 | 0.06141787 |
| ZNF30      | zinc finger pr | 2.15472807 | 1.73E-05   | 0.00030757 | 3.56664255 | 3.74649015 |
| ZNF35      | zinc finger pr | 1.5994921  | 0.00052213 | 0.0048161  | 6.97298656 | 7.39061717 |
| ZNF362     | zinc finger pr | -1.5979995 | 0.00020345 | 0.00228051 | 18.1137352 | 16.214318  |
| ZNF395     | zinc finger pr | -2.6079234 | 1.28E-14   | 3.15E-12   | 73.9577396 | 80.7645007 |
| ZNF416     | zinc finger pr | 1.5525034  | 0.02102569 | 0.07835699 | 4.38817258 | 4.93390232 |
| ZNF419     | zinc finger pr | 1.52166093 | 0.00864418 | 0.04092107 | 5.63048627 | 5.99847876 |
| ZNF420     | zinc finger pr | 1.50387872 | 0.00669982 | 0.03397836 | 5.26981456 | 5.09768331 |
| ZNF425     | zinc finger pr | 1.5294576  | 0.00924203 | 0.04280421 | 4.26794867 | 4.4835046  |
| ZNF433     | zinc finger pr | 1.63999322 | 0.02238215 | 0.08179142 | 2.90541107 | 2.43624223 |
| ZNF441     | zinc finger pr | 1.78927988 | 0.0015509  | 0.01115695 | 5.95108336 | 4.44255935 |
| ZNF442     | zinc finger pr | 3.12694979 | 0.02172101 | 0.08025567 | 0.28052245 | 0.4299251  |
| ZNF460     | zinc finger pr | 1.83092661 | 0.01828637 | 0.07056794 | 1.54287346 | 2.31340648 |
| ZNF467     | zinc finger pr | -2.4939013 | 7.20E-07   | 2.16E-05   | 12.0624653 | 13.65524   |
| ZNF469     | zinc finger pr | -2.173455  | 3.41E-05   | 0.00053953 | 13.625376  | 12.5292457 |
| ZNF480     | zinc finger pr | 1.60156725 | 0.00019955 | 0.00224628 | 9.9585469  | 10.9323811 |
| ZNF496     | zinc finger pr | -1.5133442 | 0.00029049 | 0.00299829 | 35.9269106 | 38.0995528 |
| ZNF503-AS2 | ZNF503 anti    | 1.56536363 | 0.00576483 | 0.03023726 | 3.30615742 | 3.39845554 |
| ZNF512     | zinc finger pr | -1.5336644 | 2.29E-05   | 0.00038918 | 18.8350786 | 18.9576496 |
| ZNF528     | zinc finger pr | 1.83138502 | 0.00229848 | 0.01506702 | 1.703172   | 1.92442663 |
| ZNF540     | zinc finger pr | 3.61577499 | 0.00075902 | 0.00640049 | 0.26048513 | 0.40945247 |
| ZNF556     | zinc finger pr | 2.47740888 | 0.00014855 | 0.00177715 | 0.9016793  | 0.90079544 |
| ZNF559-ZNF | ZNF559-ZNF     | 4.20921743 | 0.01258792 | 0.05401698 | 0.3406344  | 0.26614411 |
| ZNF561-AS1 | ZNF561 anti    | 2.24447626 | 0.00015255 | 0.00181618 | 2.32432885 | 2.25198861 |
| ZNF563     | zinc finger pr | 1.73598107 | 0.02851545 | 0.09713556 | 1.60298542 | 1.53544678 |
| ZNF569     | zinc finger pr | 1.51227025 | 0.00816642 | 0.03945071 | 7.09321047 | 6.9811647  |
| ZNF570     | zinc finger pr | 1.70138415 | 0.01580905 | 0.06364261 | 2.42451544 | 2.37482435 |
| ZNF582     | zinc finger pr | 1.75137149 | 0.01639422 | 0.06529739 | 1.54287346 | 1.53544678 |

|            |                  |            |            |            |            |            |
|------------|------------------|------------|------------|------------|------------|------------|
| ZNF583     | zinc finger pr   | 1.68146259 | 0.03816689 | 0.11928863 | 1.32246297 | 1.47402891 |
| ZNF585B    | zinc finger pr   | 1.60794601 | 0.00230784 | 0.01509364 | 6.81268802 | 6.91974683 |
| ZNF593     | zinc finger pr   | 1.62992599 | 0.00553115 | 0.02938177 | 14.1864209 | 13.3686233 |
| ZNF608     | zinc finger pr   | -1.5124194 | 0.00262071 | 0.01668803 | 17.0717947 | 16.6647157 |
| ZNF684     | zinc finger pr   | 1.60500867 | 0.03769741 | 0.11803739 | 2.74511252 | 2.66144109 |
| ZNF773     | zinc finger pr   | 1.77001633 | 0.00099104 | 0.00790725 | 4.80895625 | 4.79059396 |
| ZNF79      | zinc finger pr   | 3.35860613 | 5.60E-08   | 2.44E-06   | 5.00932943 | 5.50713579 |
| ZNF790-AS1 | ZNF790 antisense | 2.3696122  | 0.00422004 | 0.02389343 | 0.98182857 | 0.83937757 |
| ZNF792     | zinc finger pr   | -1.6048727 | 0.01803064 | 0.06992099 | 5.79078482 | 5.24099168 |
| ZNF81      | zinc finger pr   | 1.59334788 | 0.04782681 | 0.14035828 | 6.89283729 | 6.48982173 |
| ZNF816     | zinc finger pr   | 1.57917434 | 0.00265538 | 0.01684282 | 4.1877994  | 4.31972361 |
| ZNF827     | zinc finger pr   | -1.6111169 | 0.0001058  | 0.00134747 | 43.4208675 | 43.4019623 |
| ZNF844     | zinc finger pr   | 1.96063069 | 0.00079898 | 0.00665472 | 3.18593351 | 3.76696277 |
| ZNF845     | zinc finger pr   | 1.50630736 | 0.03067297 | 0.10194041 | 5.67056091 | 5.95753351 |
| ZNF850     | zinc finger pr   | 1.77801645 | 0.00603264 | 0.03136177 | 2.30429154 | 2.27246124 |
| ZNF853     | zinc finger pr   | -1.6402643 | 9.38E-05   | 0.00122232 | 9.85836031 | 11.1575799 |
| ZP1        | zona pellucic    | -3.6661858 | 1.46E-05   | 0.00026698 | 2.58481398 | 2.90711257 |
| ZP4        | zona pellucic    | -8.5283929 | 0.00017662 | 0.00203022 | 1.42264956 | 1.14646693 |
| ZSCAN16    | zinc finger ar   | 1.50324553 | 0.02373863 | 0.08534288 | 4.02750086 | 3.72601752 |
| ZSCAN4     | zinc finger ar   | 19.7431353 | 3.56E-07   | 1.19E-05   | 0.14026122 | 0.06141787 |

| A3         | B1         | B2         | B3         | C1         | C2         | C3         |
|------------|------------|------------|------------|------------|------------|------------|
| 5.03651929 | 6.4413187  | 8.76763847 | 6.90698171 | 7.59653322 | 9.31133955 | 7.47099229 |
| 0.58837842 | 1.38028258 | 1.89257394 | 2.19301793 | 0.83939594 | 3.96021703 | 1.18717138 |
| 3.50673539 | 4.33803096 | 4.01689164 | 4.69346828 | 6.06463564 | 6.93520933 | 7.53239771 |
| 74.6534541 | 61.1925277 | 57.974561  | 57.9817545 | 33.9115958 | 37.7283115 | 41.1416288 |
| 8.09608708 | 14.1095553 | 15.2564634 | 13.424549  | 11.8564676 | 13.9476912 | 14.4098043 |
| 10.4496008 | 15.7308396 | 17.3421572 | 16.8063056 | 16.9977677 | 14.6817802 | 19.6702016 |
| 6.30741668 | 10.5164387 | 10.3512208 | 9.87882844 | 11.3318451 | 17.6567725 | 18.2169401 |
| 31.8901104 | 50.3474503 | 49.8828418 | 49.8245476 | 77.0985167 | 57.587351  | 62.7563353 |
| 80.4430978 | 54.4663888 | 58.4380485 | 59.1909886 | 26.5039267 | 25.5578884 | 29.1471042 |
| 0.37656219 | 0.70109591 | 0.75316718 | 0.51238737 | 1.3640184  | 1.02386099 | 0.90061277 |
| 6.4486275  | 3.00156688 | 4.15207549 | 3.99662146 | 3.33659884 | 2.87840164 | 4.60540621 |
| 0.42363246 | 0.98591613 | 0.88835103 | 1.12725221 | 0.96530533 | 1.71931373 | 1.06436055 |
| 67.0986752 | 49.2958064 | 45.2286549 | 47.7135116 | 33.1561395 | 41.031712  | 31.7466001 |
| 3.05956779 | 2.25665247 | 1.46771041 | 2.07004496 | 0.81841104 | 0.63749835 | 1.28951374 |
| 107.908602 | 132.15658  | 129.139204 | 134.081526 | 154.364913 | 238.752791 | 235.981014 |
| 121.912009 | 94.4945836 | 88.2364321 | 88.1716181 | 46.1877614 | 84.3622817 | 91.2484483 |
| 3.64794621 | 0.87636989 | 1.71876613 | 1.06576572 | 1.04924492 | 0.52158956 | 0.28655861 |
| 1.9769515  | 7.2738701  | 6.52744891 | 6.82499973 | 5.162285   | 12.6533764 | 9.5178395  |
| 0.72958924 | 1.94992301 | 2.06638176 | 1.5371621  | 5.05736051 | 2.83976538 | 2.84511761 |
| 1.3415028  | 2.8262929  | 3.39890831 | 2.58243233 | 6.08562053 | 5.94998461 | 5.13758648 |
| 2.80068129 | 1.57746581 | 1.52564634 | 2.56193684 | 2.51818781 | 1.08181538 | 1.28951374 |
| 12.0970603 | 9.17997462 | 9.42424576 | 7.76779248 | 4.97342092 | 8.42270548 | 7.98270409 |
| 33.7964565 | 23.9029888 | 21.4749207 | 23.8977468 | 26.5458965 | 17.4635912 | 16.5794623 |
| 22.4289854 | 56.7449505 | 54.4018449 | 53.0423402 | 74.4334346 | 62.2237027 | 59.0924788 |
| 0.51777301 | 1.2488271  | 0.69523124 | 0.43040539 | 1.65780697 | 0.73408901 | 0.85967583 |
| 0.82372979 | 0.52582194 | 0.63729531 | 1.25022518 | 2.68606699 | 2.27953956 | 2.74277525 |
| 10.6378819 | 12.9483652 | 15.4495832 | 14.2648643 | 20.3553514 | 15.8601862 | 21.3895533 |
| 340.765247 | 299.061226 | 300.571641 | 295.893457 | 83.016258  | 126.630354 | 119.35166  |
| 192.164392 | 142.03765  | 147.910447 | 149.555625 | 78.1897314 | 113.43607  | 126.556563 |
| 2.37704882 | 0.61345892 | 0.88835103 | 0.7583333  | 0.46166776 | 0.44431703 | 0.22515319 |
| 2.235838   | 0.46009419 | 1.87326196 | 0.69684682 | 0.18886409 | 0.88863406 | 1.3918561  |
| 3.34198943 | 2.34428946 | 2.89679685 | 1.88558551 | 1.48992779 | 2.78181098 | 2.10825262 |
| 54.9310094 | 34.1565165 | 31.4978378 | 29.7594583 | 13.010637  | 17.1158648 | 17.9303815 |
| 3.36552457 | 1.86228602 | 2.3946854  | 1.76261254 | 1.69977677 | 2.00908571 | 0.92108124 |
| 1.88281095 | 3.52738881 | 2.0277578  | 2.7054053  | 2.20341433 | 3.80567197 | 3.62291955 |
| 18.8281095 | 11.0422606 | 11.2009478 | 12.3792788 | 5.91774135 | 6.9158912  | 7.08209132 |
| 33.5611052 | 21.0328774 | 21.0886811 | 20.0445938 | 21.0268682 | 14.8363253 | 17.561949  |
| 3.67148135 | 5.95931526 | 6.43088901 | 5.84121598 | 3.8612213  | 8.1329335  | 6.63178494 |
| 58.8378421 | 44.9577754 | 45.981822  | 43.3069803 | 25.5805911 | 23.4328939 | 23.0474995 |
| 263.405252 | 185.637052 | 182.363018 | 189.480848 | 117.263612 | 133.526927 | 124.857679 |

|            |            |            |            |            |            |            |
|------------|------------|------------|------------|------------|------------|------------|
| 9.55526556 | 6.26604473 | 6.73988068 | 5.20585565 | 1.53189758 | 2.91703791 | 2.53809053 |
| 77.4541354 | 115.374096 | 122.824187 | 118.750896 | 178.161787 | 140.558727 | 142.337755 |
| 21.8641421 | 10.6259849 | 12.6686582 | 12.7277022 | 17.5853449 | 14.5465533 | 14.5530836 |
| 21.2286934 | 12.7511819 | 14.3488004 | 14.1213958 | 10.9331321 | 7.59202581 | 7.55286618 |
| 3.3184543  | 7.01095913 | 5.21423434 | 4.85743224 | 8.83464222 | 5.1579412  | 3.78666733 |
| 5.8131788  | 7.82160128 | 6.85575255 | 8.0752249  | 17.1866318 | 12.8658758 | 12.5267049 |
| 197.130306 | 130.601023 | 134.585182 | 134.757878 | 95.8800007 | 96.8224768 | 96.4269718 |
| 90.3278552 | 137.809165 | 145.940625 | 138.201121 | 196.334709 | 183.251799 | 175.251058 |
| 307.83959  | 152.072085 | 165.001549 | 161.279048 | 61.2759033 | 108.046311 | 107.131983 |
| 9.69647638 | 5.52113032 | 4.40313122 | 4.59099081 | 1.86765596 | 3.4579456  | 5.99726231 |
| 9.03749255 | 5.67449505 | 6.27639318 | 6.31261236 | 3.52546293 | 5.11930494 | 3.92994663 |
| 28.2892345 | 17.6588533 | 14.9667837 | 16.7243237 | 10.5134341 | 8.80906812 | 8.43301048 |
| 26.6888452 | 32.0970473 | 36.0554648 | 31.8499987 | 61.6116617 | 40.6646675 | 45.5014133 |
| 91.9047094 | 55.3208494 | 51.8140397 | 50.8288268 | 17.354511  | 27.7794736 | 31.1530144 |
| 25.1825964 | 38.6479122 | 33.5449076 | 36.7279265 | 66.3122789 | 37.5737664 | 43.0247282 |
| 19.8165852 | 35.3396159 | 35.9975289 | 31.9319807 | 48.2232965 | 47.3873774 | 42.3288002 |
| 35.3027053 | 51.6181866 | 52.3161512 | 54.026124  | 75.9863171 | 53.781679  | 58.1304606 |
| 70.4406646 | 48.0907978 | 51.6788559 | 50.1524755 | 29.2109786 | 33.0533236 | 29.617879  |
| 4.51874628 | 2.97965763 | 2.97404477 | 2.60292782 | 4.57470785 | 3.3999912  | 1.5351354  |
| 8.51971954 | 5.34585634 | 5.04042652 | 5.34932411 | 3.50447803 | 3.65112692 | 4.66681162 |
| 6.56630318 | 5.49922107 | 3.47615622 | 2.72590079 | 6.77812218 | 3.67044505 | 4.09369441 |
| 9.34344933 | 5.63067655 | 3.8623958  | 4.48851333 | 6.82009198 | 4.53976098 | 3.33636094 |
| 27.347829  | 15.5993841 | 19.6595946 | 17.5851344 | 18.382771  | 18.2942709 | 14.3279304 |
| 105.83751  | 65.2019199 | 62.6673719 | 67.450673  | 56.2605126 | 41.5146653 | 38.9719708 |
| 20.0284015 | 15.6212933 | 12.7072822 | 12.5842337 | 6.92501647 | 10.4704275 | 12.8746689 |
| 1.60038931 | 0.32863871 | 2.00844582 | 1.5576576  | 5.62395277 | 3.67044505 | 2.08778415 |
| 38.9506515 | 22.3693415 | 26.3029154 | 26.9105845 | 14.0179121 | 20.5931285 | 15.2285432 |
| 1.22382712 | 0.61345892 | 1.5642703  | 1.59864859 | 4.51175315 | 3.38067307 | 3.50010872 |
| 10.661417  | 32.0970473 | 24.4296535 | 23.9797288 | 36.0730403 | 29.88515   | 32.4220597 |
| 0.21181623 | 1.2488271  | 0.61798333 | 1.04527023 | 0.18886409 | 2.06704011 | 0.42983791 |
| 65.5453561 | 48.4413458 | 54.3632209 | 51.6281511 | 39.0948657 | 32.241962  | 26.711356  |
| 0.37656219 | 0.56964043 | 0.79179114 | 0.57387385 | 1.17515431 | 1.00454286 | 1.28951374 |
| 32.855051  | 20.9233312 | 20.1810181 | 26.1932422 | 12.6329088 | 15.3385967 | 15.5355703 |
| 263.805349 | 194.269296 | 198.430584 | 207.98828  | 97.3489436 | 159.818905 | 154.659775 |
| 5.46015175 | 9.09233763 | 7.51235984 | 7.00945918 | 17.6902693 | 9.85224724 | 13.6115339 |
| 2.14169745 | 1.11737161 | 0.88835103 | 0.96328825 | 1.65780697 | 0.56022582 | 1.35091915 |
| 60.5794423 | 24.8231772 | 30.9957263 | 21.376801  | 37.6678926 | 30.329467  | 32.3197173 |
| 1.29443253 | 1.68701204 | 3.64996403 | 3.64819805 | 1.61583718 | 3.24544615 | 1.78075707 |
| 7.06054106 | 4.60094193 | 3.68858799 | 6.10765741 | 2.11947474 | 4.61703351 | 4.72821704 |
| 2.49472451 | 1.75273978 | 1.00422291 | 1.72162155 | 0.56659226 | 1.62272307 | 1.73982012 |
| 185.174457 | 104.068925 | 112.086726 | 112.766212 | 51.5389104 | 67.1305081 | 63.8206958 |
| 15.5096552 | 23.1799836 | 20.6638176 | 22.9754495 | 29.1480239 | 30.484012  | 26.8751038 |
| 10.6849521 | 18.6885879 | 18.9836754 | 17.4211705 | 35.0657652 | 30.2715126 | 33.7115734 |



|            |            |            |            |            |            |            |
|------------|------------|------------|------------|------------|------------|------------|
| 3.41259484 | 7.18623311 | 9.26974993 | 8.95653118 | 7.7853973  | 11.7840604 | 9.31315478 |
| 2.09462718 | 2.78247441 | 4.01689164 | 2.3159909  | 2.47621801 | 4.249989   | 4.05275746 |
| 6.04853017 | 4.55712344 | 4.17138747 | 4.75495477 | 1.67879187 | 3.53521813 | 5.40367662 |
| 6.58983832 | 4.16275699 | 4.17138747 | 4.57049531 | 3.16871966 | 3.20680989 | 5.23992884 |
| 245.683294 | 167.540014 | 172.243541 | 170.50202  | 67.2565993 | 105.052001 | 113.86611  |
| 53.8013229 | 33.1925097 | 32.2703169 | 35.9695932 | 12.6748786 | 19.1249505 | 18.2578771 |
| 119.770311 | 87.7684447 | 86.7880337 | 82.6378346 | 42.7672229 | 75.6884405 | 79.9907887 |
| 1.43564335 | 2.49765419 | 5.58116194 | 3.79166652 | 2.77000659 | 2.39544835 | 4.03228899 |
| 1.27089739 | 0.63536817 | 0.42486354 | 0.61486484 | 0.0209849  | 0.3670445  | 0.10234236 |
| 1.41210821 | 2.47574494 | 2.43330936 | 1.59864859 | 6.10660543 | 4.09544395 | 3.74573038 |
| 0.30595678 | 2.14710623 | 0.86903906 | 0.59436935 | 1.74174657 | 2.24090329 | 1.33045068 |
| 2.37704882 | 3.96557376 | 3.2251005  | 4.03761245 | 4.78455683 | 6.02725713 | 5.05571259 |
| 6.56630318 | 9.15806537 | 8.96075826 | 10.1657654 | 10.744268  | 12.1897412 | 12.3424886 |
| 21.6523259 | 29.3145729 | 29.8563196 | 26.9105845 | 49.1886018 | 38.2305829 | 41.2439712 |
| 10.9909089 | 19.6087763 | 21.0307452 | 20.6389631 | 23.125358  | 23.5294846 | 21.9217336 |
| 22.5466611 | 12.312997  | 13.1128338 | 13.4450445 | 6.44236381 | 9.63974779 | 9.68158727 |
| 29.6307373 | 16.6291187 | 16.9752296 | 14.9207201 | 12.5069994 | 12.4215588 | 9.16987547 |
| 46.5525007 | 32.250412  | 27.8285618 | 29.4315304 | 21.2996719 | 20.515856  | 17.7871022 |
| 206.426685 | 106.413214 | 111.603927 | 112.417788 | 59.3033229 | 49.1260093 | 46.3406207 |
| 1.0826163  | 1.97183226 | 2.43330936 | 3.0743242  | 1.63682207 | 1.6999956  | 2.61996442 |
| 6.16620586 | 4.27230322 | 4.90524267 | 5.28783763 | 1.90962575 | 3.18749175 | 3.25448705 |
| 10.143644  | 18.5352232 | 16.531054  | 18.4459452 | 25.0559687 | 24.3988005 | 21.5737695 |
| 1.29443253 | 6.76995741 | 7.78272754 | 7.37837808 | 35.4854632 | 26.1374324 | 30.7845819 |
| 19.8165852 | 35.7120731 | 33.5449076 | 37.1788273 | 95.9219705 | 71.2645884 | 67.9757956 |
| 92.3283419 | 65.6401049 | 72.690289  | 71.9801773 | 29.8615104 | 52.0430472 | 50.7822791 |
| 66.7927184 | 49.0548047 | 44.1278721 | 43.3889622 | 32.2537888 | 36.1055884 | 43.6387824 |
| 12.5912982 | 7.71205505 | 9.3856218  | 9.01801766 | 5.30917929 | 5.98862087 | 7.3891184  |
| 39.727311  | 32.2065935 | 29.3542081 | 28.6117106 | 17.6692844 | 21.1147181 | 23.1907788 |
| 3.83622731 | 0.87636989 | 2.89679685 | 2.09054046 | 1.17515431 | 1.12045165 | 1.9035679  |
| 2.70654074 | 1.40219183 | 1.27459062 | 2.00855848 | 0.98629022 | 1.25567857 | 1.43279304 |
| 2.77714615 | 1.6212843  | 1.04284687 | 1.06576572 | 1.80470126 | 1.10113351 | 0.8801443  |
| 15.5331903 | 10.9984421 | 12.3596666 | 11.8668914 | 6.42137891 | 8.17156977 | 9.76346116 |
| 15.0389525 | 11.8090843 | 11.2009478 | 12.1538283 | 7.51259362 | 6.45225603 | 7.02068591 |
| 54.3190959 | 33.8497871 | 37.6583591 | 31.1941429 | 19.8517139 | 19.9556302 | 22.679067  |
| 10.2142494 | 13.2989131 | 16.6855499 | 15.1051796 | 21.5095209 | 20.7476736 | 18.5239672 |
| 0.77665952 | 1.64319355 | 1.54495832 | 1.96756749 | 2.79099149 | 2.26022143 | 1.57607235 |
| 1.9769515  | 2.51956344 | 3.36028435 | 3.52522508 | 2.05652004 | 3.86362637 | 3.60245108 |
| 202.896415 | 146.353772 | 139.277993 | 144.759679 | 120.411347 | 117.724695 | 127.39577  |
| 21.7229313 | 14.4162847 | 13.0742098 | 13.8549544 | 10.7022982 | 11.5329247 | 11.3395335 |
| 9.48466015 | 14.26292   | 14.9088478 | 13.9164409 | 20.1874723 | 19.6465401 | 19.6906701 |
| 36.5265324 | 28.701114  | 25.2793805 | 30.4768006 | 11.2479055 | 18.9704055 | 20.9801838 |
| 53.9660688 | 34.1346073 | 33.8925232 | 39.8637372 | 28.0987789 | 34.4828653 | 37.7847994 |
| 2.8712867  | 5.58685806 | 4.59625101 | 4.09909894 | 6.75713728 | 10.4124731 | 7.59380313 |

|            |            |            |            |            |            |            |
|------------|------------|------------|------------|------------|------------|------------|
| 1.15322171 | 0.85446064 | 1.91188592 | 2.02905397 | 2.07750494 | 2.53067527 | 2.23106345 |
| 23.7704882 | 18.1408568 | 18.9064275 | 17.7081074 | 8.89759692 | 17.4249549 | 16.3952461 |
| 4.44814087 | 1.53364731 | 1.5642703  | 1.63963957 | 0.60856205 | 0.50227143 | 0.47077486 |
| 3.15370834 | 4.11893849 | 5.61978589 | 4.54999982 | 8.07918588 | 7.3408901  | 6.09960467 |
| 7.08407619 | 3.33020559 | 3.5920281  | 3.93513498 | 2.89591598 | 1.85454066 | 1.96497332 |
| 72.6294323 | 121.442958 | 129.00402  | 125.350445 | 76.1541963 | 136.424647 | 147.35253  |
| 65.7571724 | 44.2785888 | 47.6619642 | 47.2216197 | 42.0957062 | 32.0487807 | 29.1880411 |
| 23.5351369 | 16.7386649 | 16.1641264 | 17.4621615 | 9.90487204 | 13.1749659 | 13.2635699 |
| 0.84726493 | 1.31455484 | 1.25527864 | 0.86081078 | 1.23810901 | 1.17840604 | 1.35091915 |
| 37.3502622 | 42.8544877 | 39.2805653 | 44.3112595 | 79.931478  | 76.1520757 | 72.7449496 |
| 270.583468 | 205.705923 | 197.368426 | 203.02837  | 109.730034 | 158.041637 | 155.703667 |
| 168.911677 | 103.937469 | 107.258731 | 108.277698 | 30.8897704 | 56.5248538 | 62.5925875 |
| 1.71806499 | 0.10954624 | 0.67591927 | 0.65585583 | 1.07022982 | 0.15454505 | 0.28655861 |
| 5.29540579 | 11.874812  | 9.44355774 | 10.2477473 | 16.2423114 | 14.4499626 | 13.6729393 |
| 94.6583204 | 82.7293178 | 69.3879406 | 75.0545015 | 35.4434934 | 56.8146257 | 52.3583515 |
| 46.434825  | 81.2175797 | 78.252139  | 70.9758981 | 124.545372 | 90.4668114 | 89.8361238 |
| 2.77714615 | 26.5101892 | 22.073592  | 26.1317557 | 117.72528  | 101.478147 | 108.728523 |
| 69.8522862 | 93.9249431 | 94.9183769 | 89.4013478 | 177.007618 | 117.801968 | 123.875193 |
| 8.44911413 | 15.6870211 | 16.8207337 | 16.4578822 | 28.0148394 | 23.0272132 | 19.9567602 |
| 11.8852441 | 2.38810796 | 3.03198071 | 2.47995486 | 2.43424821 | 1.13976978 | 0.98248666 |
| 9.72001152 | 7.88732903 | 9.1152541  | 9.01801766 | 3.67235722 | 5.31248626 | 5.21946037 |
| 91.0103742 | 139.518087 | 118.208624 | 135.249769 | 253.05689  | 135.36215  | 156.051631 |
| 30.3838617 | 48.5728013 | 40.3041002 | 48.9637368 | 99.342509  | 47.7351038 | 62.5925875 |
| 91.99885   | 128.93592  | 123.847721 | 121.066887 | 216.606121 | 143.610992 | 134.252708 |
| 32.3608132 | 46.4695135 | 45.8852621 | 45.6844576 | 71.0338811 | 51.6373664 | 50.3729097 |
| 1.92988122 | 3.26447785 | 2.62642915 | 2.2954954  | 5.72887726 | 4.3079434  | 3.58198261 |
| 3.10663806 | 1.38028258 | 0.94628697 | 1.98806298 | 0.98629022 | 1.04317912 | 0.69592805 |
| 78.25433   | 43.7089484 | 46.3487496 | 47.5700432 | 18.9073935 | 26.3885681 | 31.828474  |
| 4.40107059 | 1.77464903 | 1.9311979  | 2.25450441 | 3.12674986 | 2.70453846 | 3.09073928 |
| 24.1941207 | 18.3161307 | 16.7627978 | 16.7038282 | 7.13486545 | 14.4885989 | 15.1262008 |
| 1.90634609 | 2.30047097 | 2.25950155 | 2.58243233 | 3.44152334 | 4.19203461 | 6.12007314 |
| 57.0727069 | 38.450729  | 43.258833  | 36.543467  | 37.2901644 | 28.6101533 | 24.7054457 |
| 31.3252672 | 48.3537088 | 50.0759616 | 48.102926  | 113.234512 | 75.8043493 | 68.5079759 |
| 1.24736225 | 0.48200344 | 1.21665468 | 0.69684682 | 0.56659226 | 0.32840824 | 0.47077486 |
| 22.2642395 | 14.4820125 | 17.7283967 | 17.0932426 | 6.44236381 | 11.9386055 | 11.7489029 |
| 73.264881  | 28.9421157 | 32.7531164 | 27.5664403 | 14.7943534 | 12.0351961 | 15.4741649 |
| 2.47118937 | 1.22691785 | 1.17803072 | 1.08626122 | 0.65053185 | 1.12045165 | 1.0234236  |
| 50.3651929 | 27.7590163 | 29.412144  | 26.0702692 | 20.1035327 | 14.0829181 | 14.7577683 |
| 0.07060541 | 8.82942666 | 0          | 0.14346846 | 0.0419698  | 5.25453186 | 0.12281083 |
| 40.9982084 | 32.9734172 | 30.6094867 | 30.2308547 | 11.8354827 | 22.5249417 | 22.0445444 |
| 21.2757637 | 32.338049  | 29.0645284 | 29.6159898 | 46.9851875 | 35.7192258 | 31.2758253 |
| 8.40204386 | 6.50704645 | 5.83221766 | 4.6114863  | 4.25993437 | 4.7329423  | 4.44165843 |
| 13.5091686 | 5.78404129 | 10.6409004 | 7.80878347 | 9.1074459  | 5.40907691 | 4.03228899 |

|            |            |            |            |            |            |            |
|------------|------------|------------|------------|------------|------------|------------|
| 101.954213 | 240.191078 | 225.660475 | 217.744135 | 350.762577 | 229.847133 | 232.132941 |
| 12.9678604 | 24.275446  | 31.0150383 | 24.0002243 | 51.2870917 | 41.4180747 | 38.5421328 |
| 63.4271938 | 38.2535458 | 37.774231  | 34.80135   | 29.6726463 | 24.6306181 | 23.027031  |
| 38.009246  | 20.7918757 | 25.5690602 | 27.4229719 | 25.5386213 | 18.0624533 | 19.1380214 |
| 1.03554602 | 0.74491441 | 0.59867135 | 1.08626122 | 0          | 0.30909011 | 0.81873888 |
| 0.47070274 | 4.16275699 | 2.14362967 | 3.40225212 | 6.4843336  | 3.4579456  | 5.46508203 |
| 2.02402177 | 0.81064215 | 0.86903906 | 1.43468463 | 0.50363756 | 0.25113571 | 0.73686499 |
| 0.47070274 | 1.11737161 | 1.39046249 | 0.88130627 | 1.61583718 | 1.56476868 | 2.06731568 |
| 88.2567632 | 17.5054886 | 18.0567004 | 19.2862605 | 11.8354827 | 12.460195  | 11.9331192 |
| 10.3319251 | 6.81377591 | 6.58538485 | 6.49707181 | 7.28175974 | 8.07497911 | 6.14054161 |
| 11.0850495 | 6.68232042 | 7.99515931 | 6.78400874 | 9.96782674 | 6.78066428 | 7.26630757 |
| 1.95341636 | 0.81064215 | 0.77247916 | 1.57815309 | 1.15416941 | 0.96590659 | 1.04389207 |
| 31.8901104 | 59.9217913 | 52.8568866 | 57.6128355 | 98.2093245 | 71.4384515 | 79.4586084 |
| 7.03700592 | 3.70266279 | 4.57693903 | 4.59099081 | 2.26636903 | 3.63180879 | 5.13758648 |
| 13.8621956 | 7.40532559 | 9.28906191 | 9.28445909 | 3.9031911  | 2.74317472 | 4.4621269  |
| 16.9688337 | 10.6478942 | 11.8961791 | 10.0222969 | 3.8612213  | 9.4658846  | 8.96519075 |
| 4.51874628 | 5.52113032 | 6.68194474 | 6.37409885 | 8.05820098 | 8.05566098 | 7.14349674 |
| 4.42460573 | 0.67918667 | 1.23596666 | 1.31171166 | 0.16787919 | 0.17386319 | 0.1432793  |
| 226.408017 | 155.511837 | 146.655169 | 150.149994 | 126.643862 | 102.695189 | 107.909785 |
| 117.510938 | 79.5524769 | 71.6667541 | 78.5592311 | 59.7649906 | 58.9396202 | 66.0722277 |
| 2.84775156 | 1.51173806 | 2.87748487 | 1.37319814 | 1.3010637  | 2.14431263 | 1.65794623 |
| 20.7109204 | 29.6870301 | 29.0065925 | 29.7799538 | 66.1234148 | 31.1601467 | 42.1241154 |
| 20.7109204 | 29.6870301 | 29.0065925 | 29.7799538 | 66.1234148 | 31.1601467 | 42.1241154 |
| 1.95341636 | 1.00782538 | 1.64151822 | 0.7788288  | 0.79742614 | 0.86931593 | 1.51466693 |
| 7.50770866 | 9.88107053 | 8.43933483 | 8.21869337 | 14.5215497 | 12.0931505 | 16.1086875 |
| 3.55380567 | 6.17840774 | 4.59625101 | 3.93513498 | 4.82652663 | 5.00339615 | 6.61131647 |
| 22.5701962 | 15.8403858 | 18.5201879 | 18.6509002 | 8.41494425 | 11.8613329 | 14.5121467 |
| 40.2921543 | 55.9123991 | 49.1876106 | 53.3702681 | 102.343349 | 61.547568  | 64.9873987 |
| 14.097547  | 29.5993931 | 24.873829  | 22.1351343 | 88.4933165 | 21.3851719 | 21.7989227 |
| 2.14169745 | 3.39593333 | 2.33674946 | 2.76689178 | 2.79099149 | 3.18749175 | 4.70774857 |
| 5.95438962 | 1.48982882 | 1.83463801 | 1.76261254 | 3.65137232 | 1.04317912 | 1.33045068 |
| 114.616116 | 74.1189836 | 72.1688656 | 73.291889  | 41.8648723 | 59.4032554 | 61.6715062 |
| 21.0874826 | 70.613504  | 71.0680828 | 74.8290511 | 101.27312  | 104.742911 | 97.2661791 |
| 0.35302705 | 1.31455484 | 0.77247916 | 0.81981979 | 1.74174657 | 0.8499978  | 1.20763985 |
| 63.8272912 | 48.3098903 | 45.4990226 | 51.3207187 | 30.8897704 | 36.2214972 | 35.0010872 |
| 85.9267847 | 68.7293088 | 62.7059959 | 61.9988714 | 27.9308998 | 47.0976054 | 47.7529453 |
| 8.66093036 | 0.98591613 | 0.61798333 | 0.92229726 | 0.71348655 | 0.54090769 | 0.96201819 |
| 1.90634609 | 2.8701114  | 3.99757966 | 2.60292782 | 5.85478665 | 4.75226043 | 5.07618106 |
| 1.41210821 | 2.38810796 | 2.06638176 | 2.25450441 | 6.31645442 | 4.44317032 | 3.72526191 |
| 6.96640051 | 12.9702744 | 8.53589473 | 7.84977446 | 22.6217205 | 11.436334  | 12.1378039 |
| 0.98847575 | 2.62910968 | 1.44839843 | 3.01283772 | 3.08478006 | 2.47272088 | 2.9269915  |
| 4.94237874 | 2.69483742 | 2.761613   | 2.50045035 | 1.57386738 | 2.00908571 | 2.70183831 |
| 11.3910062 | 4.42566795 | 4.59625101 | 5.28783763 | 8.26804997 | 3.76703571 | 3.37729789 |

|            |            |            |            |            |            |            |
|------------|------------|------------|------------|------------|------------|------------|
| 1.7886704  | 1.35837333 | 0.75316718 | 1.29121616 | 0.33575837 | 0.88863406 | 0.45030638 |
| 15.3919795 | 22.9608912 | 24.3717175 | 23.5698189 | 21.8242943 | 34.3090021 | 28.3488338 |
| 30.6427482 | 46.7543337 | 47.7199002 | 45.0081063 | 79.51178   | 44.9919291 | 53.6478652 |
| 28.1480237 | 18.0532198 | 22.3632717 | 25.2709449 | 18.2148918 | 13.5613286 | 18.2578771 |
| 1.76513526 | 2.80438365 | 3.70789997 | 2.62342332 | 5.07834541 | 3.12953736 | 2.96792845 |
| 19.3458825 | 25.6557286 | 24.4103415 | 19.0813055 | 45.3483654 | 31.4692368 | 32.3401858 |
| 14.450574  | 22.2817045 | 19.0029874 | 19.7166659 | 43.3338152 | 19.2215412 | 23.067968  |
| 4.18925436 | 1.84037677 | 3.2251005  | 2.04954947 | 0.92333553 | 2.08635824 | 2.16965804 |
| 4.44814087 | 1.9937415  | 2.16294165 | 2.27499991 | 3.39955354 | 1.39090549 | 1.12576596 |
| 2.70654074 | 0.81064215 | 1.23596666 | 1.27072067 | 1.86765596 | 0.96590659 | 0.8801443  |
| 37.3973325 | 22.9170727 | 24.2944696 | 26.1727467 | 11.3947998 | 14.7010983 | 13.0588852 |
| 55.2369662 | 35.4053436 | 38.0639106 | 38.7569804 | 24.9300593 | 27.547656  | 24.2346709 |
| 1.64745958 | 2.71674666 | 3.43753227 | 3.83265751 | 1.97258045 | 4.59771538 | 4.58493774 |
| 21.5581854 | 13.0140929 | 12.1472348 | 10.5961707 | 16.0534473 | 13.2329203 | 8.84237992 |
| 93.1991419 | 132.309944 | 130.394482 | 125.32995  | 216.396272 | 141.87236  | 151.425756 |
| 10.0730386 | 6.4851372  | 6.75919266 | 5.69774752 | 4.86849643 | 6.14316592 | 4.81009093 |
| 1.74160013 | 3.15493161 | 3.05129268 | 2.58243233 | 4.38584376 | 3.36135494 | 2.64043289 |
| 3.20077861 | 1.2050086  | 1.73807811 | 1.35270265 | 0.48265266 | 0.3670445  | 0.67545958 |
| 197.506868 | 99.9280769 | 94.0879618 | 97.7020231 | 46.2297312 | 56.3896268 | 52.2764776 |
| 3.05956779 | 3.85602752 | 5.46529006 | 6.04617093 | 8.31001976 | 6.14316592 | 9.08800158 |
| 13.5562388 | 7.55869032 | 6.43088901 | 6.76351324 | 4.78455683 | 5.19657746 | 4.76915398 |
| 0.30595678 | 0.65727742 | 0.32830364 | 0.65585583 | 2.5601576  | 0.44431703 | 2.35387428 |
| 24.8766397 | 33.6526038 | 35.1671138 | 31.6245483 | 61.3808278 | 39.1578532 | 42.0217731 |
| 5.67196798 | 3.63693505 | 4.40313122 | 4.6319818  | 1.21712411 | 2.43408461 | 1.3918561  |
| 0.91787034 | 1.94992301 | 1.52564634 | 1.9265765  | 2.35030862 | 2.56931153 | 2.25153192 |
| 6.02499503 | 10.2097092 | 8.05309525 | 6.25112588 | 10.2406304 | 11.8806511 | 11.8103084 |
| 0.65898383 | 1.46791957 | 1.27459062 | 1.39369364 | 1.3640184  | 1.41022362 | 1.00295513 |
| 16.5216661 | 9.74961505 | 11.007828  | 12.2563058 | 8.81365732 | 8.51929614 | 7.90083021 |
| 83.0790331 | 34.3975183 | 30.8219185 | 32.1984221 | 9.88388714 | 8.80906812 | 11.7898399 |
| 4.58935169 | 7.49296257 | 6.93300047 | 7.74729699 | 5.56099807 | 9.71702032 | 7.92129868 |
| 2.80068129 | 1.73083054 | 1.33252655 | 2.52094585 | 2.16144453 | 1.00454286 | 1.0234236  |
| 2.49472451 | 0.10954624 | 0.13518385 | 0.3689189  | 0.16787919 | 0.40568077 | 0.1432793  |
| 0.56484328 | 1.79655828 | 1.27459062 | 1.02477473 | 1.09121472 | 1.77726813 | 1.57607235 |
| 6.02499503 | 3.92175527 | 4.51900309 | 4.40653136 | 2.74902169 | 3.09090109 | 2.2720004  |
| 7.6018492  | 26.5101892 | 23.9854779 | 28.837161  | 50.8254239 | 40.3555774 | 41.9194307 |
| 15.5096552 | 20.0688705 | 22.4018957 | 21.3153145 | 41.3822196 | 24.6885725 | 25.4627792 |
| 49.870955  | 31.1111312 | 31.7488935 | 29.9439177 | 28.8332504 | 19.5306313 | 21.4509587 |
| 2.11816232 | 0.59154968 | 0.3669276  | 0.63536034 | 0.29378858 | 0.25113571 | 0.3684325  |
| 52.0597227 | 36.2598043 | 36.7506961 | 38.0396381 | 24.2375576 | 30.0203769 | 32.6267444 |
| 62.250437  | 35.3615251 | 34.2015148 | 32.5468456 | 27.8259753 | 25.6158428 | 26.6090136 |
| 6.16620586 | 4.27230322 | 3.55340414 | 3.21779266 | 5.81281685 | 3.90226263 | 2.43574817 |
| 1.22382712 | 1.77464903 | 1.89257394 | 1.70112606 | 3.29462905 | 1.06249725 | 2.68136984 |
| 52.2244687 | 37.7058146 | 38.623958  | 41.7083317 | 11.8984374 | 28.4749263 | 33.4454833 |

|            |            |            |            |            |            |            |
|------------|------------|------------|------------|------------|------------|------------|
| 2.98896238 | 3.30829634 | 2.91610883 | 3.05382871 | 4.28091927 | 5.77612142 | 7.06162285 |
| 108.285165 | 80.3412098 | 77.1899801 | 84.4209426 | 60.5414319 | 56.8918983 | 54.3847302 |
| 442.931276 | 313.346055 | 288.405095 | 302.042105 | 210.142772 | 208.326734 | 203.88645  |
| 5.08358956 | 2.51956344 | 2.54918123 | 2.52094585 | 3.9661458  | 2.41476648 | 1.7602886  |
| 15.8626822 | 9.28952085 | 10.5636525 | 9.69436898 | 14.4166252 | 12.8851939 | 9.10847006 |
| 6.87225996 | 11.8090843 | 9.28906191 | 15.0027021 | 18.6555747 | 14.1022362 | 14.614489  |
| 27.2536885 | 19.7621411 | 18.0953243 | 20.2700442 | 11.1849508 | 15.976095  | 14.8805792 |
| 176.866553 | 117.455475 | 119.34803  | 125.391436 | 81.2535266 | 103.622459 | 108.50337  |
| 14.8036011 | 13.0579114 | 11.4326916 | 11.723423  | 9.48517407 | 8.1329335  | 9.55877644 |
| 15.9568228 | 11.1956254 | 10.2353489 | 9.01801766 | 8.49888385 | 8.03634285 | 10.3979838 |
| 29.748413  | 19.4773208 | 18.1146363 | 20.8234226 | 10.0517663 | 14.9908703 | 14.6758944 |
| 0.37656219 | 0.70109591 | 1.02353489 | 1.37319814 | 0.90235063 | 1.31363297 | 1.61700929 |
| 1.36503794 | 2.76056516 | 1.50633436 | 2.50045035 | 2.03553514 | 2.14431263 | 2.80418067 |
| 6.51923291 | 10.363074  | 7.16474422 | 6.88648621 | 13.9549574 | 9.65906592 | 11.8717138 |
| 0.21181623 | 0.92018839 | 1.1007828  | 0.84031528 | 2.18242943 | 1.60340494 | 2.2720004  |
| 7.53124379 | 11.8309935 | 10.0229171 | 8.73108073 | 13.1785162 | 14.0829181 | 11.9535877 |
| 0.77665952 | 3.33020559 | 1.62220624 | 2.09054046 | 2.11947474 | 1.13976978 | 1.14623443 |
| 30.8310293 | 12.050086  | 9.21181399 | 9.44842305 | 12.7378333 | 7.93975219 | 5.11711801 |
| 13.9092659 | 8.32551397 | 7.26130411 | 7.68581051 | 8.35198956 | 5.91134834 | 5.07618106 |
| 0.02353514 | 0.65727742 | 0.59867135 | 1.04527023 | 5.07834541 | 3.05226483 | 3.86854121 |
| 8.33143845 | 14.3067385 | 15.642703  | 15.412612  | 19.2641367 | 17.4056368 | 14.9215161 |
| 73.8061892 | 51.4867311 | 45.8852621 | 51.874097  | 29.6516614 | 32.7055972 | 31.1530144 |
| 66.6515076 | 43.8184946 | 42.4863538 | 45.6639621 | 40.5008539 | 26.7362945 | 26.9979146 |
| 51.8949768 | 36.6541707 | 34.1242669 | 33.8380617 | 22.0341433 | 22.4669873 | 23.4773374 |
| 43.9401005 | 24.363083  | 26.2642915 | 26.2957197 | 17.8161787 | 17.2317736 | 17.6438229 |
| 2.44765423 | 0.59154968 | 0.98491093 | 1.49617111 | 0.46166776 | 1.29431483 | 1.04389207 |
| 2.30644341 | 5.14867311 | 3.45684424 | 4.30405388 | 5.2462246  | 7.39884449 | 6.61131647 |
| 1.71806499 | 4.27230322 | 3.1285406  | 3.34076563 | 4.49076826 | 3.30340054 | 3.21355011 |
| 1.71806499 | 6.94523139 | 5.75496975 | 5.69774752 | 8.75070263 | 11.3783797 | 8.06457798 |
| 4.30693004 | 6.70422967 | 5.34941819 | 6.78400874 | 9.42221938 | 10.4511093 | 10.6640739 |
| 1179.46338 | 820.019308 | 822.53581  | 870.115731 | 656.008909 | 710.92657  | 681.98902  |
| 153.237276 | 312.951688 | 302.039352 | 305.649312 | 275.531716 | 292.669697 | 282.587725 |
| 58.3906745 | 83.5399599 | 84.3740363 | 83.2936904 | 131.554328 | 97.8463378 | 87.4413125 |
| 0.14121082 | 1.73083054 | 0.32830364 | 0.51238737 | 1.88864086 | 0.75340714 | 0.92108124 |
| 239.422947 | 174.682429 | 175.449329 | 170.932426 | 133.296075 | 120.197416 | 129.094653 |
| 12.5677631 | 6.37559096 | 6.3536411  | 6.21013489 | 7.99524629 | 5.48634944 | 4.13463135 |
| 2.40058396 | 3.94366451 | 5.94808954 | 3.60720706 | 4.15500988 | 5.66021263 | 3.88900969 |
| 70.1817781 | 43.9718593 | 46.966733  | 48.020944  | 31.8760607 | 36.6464961 | 39.9544574 |
| 1.74160013 | 0.15336473 | 0.23174375 | 0.18445945 | 0.60856205 | 0.34772637 | 0.04093694 |
| 20.4284988 | 12.6854542 | 12.900402  | 13.9779274 | 15.7806436 | 10.4317912 | 9.59971338 |
| 26.2887479 | 14.8544697 | 17.7477087 | 16.8882876 | 9.23335529 | 13.2329203 | 15.740255  |
| 24.1470504 | 17.0453944 | 19.311979  | 17.0932426 | 14.7104138 | 8.34543295 | 10.3979838 |
| 71.4762106 | 38.5164567 | 42.7180976 | 37.5067553 | 35.5694028 | 33.4590043 | 30.5184918 |

|            |            |            |            |            |            |            |
|------------|------------|------------|------------|------------|------------|------------|
| 0.84726493 | 1.27073634 | 2.10500571 | 2.21351343 | 3.48349313 | 3.12953736 | 3.15214469 |
| 13.9563362 | 8.56651569 | 8.61314264 | 6.47657632 | 2.95887067 | 5.38975878 | 6.40663175 |
| 16.7570174 | 13.6275518 | 13.5763213 | 11.9693689 | 7.42865403 | 8.30679669 | 7.16396521 |
| 90.4455309 | 54.7950275 | 53.1465663 | 49.0662143 | 36.0310705 | 35.313545  | 28.7377347 |
| 27.7949966 | 21.4272439 | 18.6360598 | 17.441666  | 13.9969272 | 15.7635956 | 12.833732  |
| 30.10144   | 20.4851462 | 20.8569373 | 21.5817559 | 12.3601052 | 19.2408593 | 17.9917869 |
| 0.68251897 | 1.55555656 | 0.98491093 | 1.37319814 | 2.14045964 | 1.85454066 | 1.16670291 |
| 153.378487 | 536.754649 | 547.398045 | 559.690969 | 913.95528  | 729.529931 | 703.071546 |
| 55.4252473 | 35.1205234 | 36.4223924 | 35.5391878 | 41.4241894 | 35.4680901 | 35.1034295 |
| 23.2997855 | 10.1658907 | 11.5099395 | 8.11621589 | 6.5263034  | 3.36135494 | 4.42118996 |
| 47.5645116 | 22.3912507 | 26.9788347 | 24.1641882 | 25.6435458 | 18.4488159 | 19.6702016 |
| 13.7209848 | 8.28169548 | 8.7483265  | 9.83783745 | 7.93229159 | 6.10452966 | 9.84533505 |
| 50.4593334 | 30.6948555 | 30.6094867 | 30.5997736 | 19.8936837 | 26.6010675 | 30.1500593 |
| 0.75312438 | 1.35837333 | 1.25527864 | 1.94707199 | 2.24538413 | 2.06704011 | 3.64338802 |
| 70.2759186 | 44.7167737 | 44.3016799 | 44.7621604 | 44.2151809 | 33.4976406 | 31.091609  |
| 11.8146387 | 4.97339914 | 7.85997546 | 6.23063038 | 7.44963893 | 3.84430824 | 2.76324372 |
| 24.5000775 | 19.9812335 | 18.5201879 | 19.4502245 | 7.23978994 | 15.7442774 | 15.0852639 |
| 74.8417352 | 56.788769  | 60.4464943 | 60.8921147 | 23.2722523 | 38.539673  | 36.3929433 |
| 8.75507091 | 14.5696495 | 16.1255025 | 16.7448192 | 24.6992254 | 17.0192742 | 16.3747776 |
| 20.4991042 | 16.0594783 | 11.4520036 | 13.588513  | 14.5005648 | 9.34997581 | 9.08800158 |
| 61.4267072 | 53.3271079 | 48.5696272 | 52.7349078 | 27.259383  | 33.4783225 | 40.4252323 |
| 383.387379 | 226.125341 | 216.004485 | 223.072964 | 81.2115568 | 130.70648  | 154.168531 |
| 41.1158841 | 24.2097183 | 26.708467  | 26.4801791 | 27.9308998 | 22.85335   | 24.2346709 |
| 6.61337346 | 4.20657548 | 3.30234841 | 2.64391881 | 2.51818781 | 3.0329467  | 2.70183831 |
| 18.8045743 | 16.0813875 | 13.4990733 | 12.0923419 | 9.46418917 | 11.9772417 | 9.84533505 |
| 55.0722202 | 38.0344533 | 38.5273981 | 39.1463948 | 38.4653188 | 35.603317  | 32.7290868 |
| 3.83622731 | 2.16901548 | 1.62220624 | 2.21351343 | 0.48265266 | 2.27953956 | 1.16670291 |
| 4.37753545 | 2.10328774 | 1.89257394 | 0.94279276 | 1.00727512 | 0.75340714 | 0.71639652 |
| 50.1769118 | 74.0313466 | 81.5737994 | 80.834231  | 93.2778733 | 88.3031806 | 80.91187   |
| 0.75312438 | 1.46791957 | 1.25527864 | 1.5371621  | 2.26636903 | 1.42954176 | 1.08482902 |
| 0.70605411 | 1.6212843  | 2.0277578  | 1.72162155 | 1.82568616 | 0.98522472 | 1.71935165 |
| 11.7204982 | 7.47105333 | 6.23776922 | 6.57905379 | 3.42053844 | 6.18180219 | 4.54400079 |
| 3.5773408  | 3.81220903 | 4.96317861 | 5.26734213 | 37.1852399 | 25.345389  | 23.9071753 |
| 13.5091686 | 11.1079884 | 10.9112681 | 9.87882844 | 7.07191076 | 6.52952856 | 6.63178494 |
| 21.2992989 | 29.6651208 | 27.5195701 | 29.8209448 | 47.9714777 | 40.7033038 | 39.7702412 |
| 11.8146387 | 9.11424687 | 9.1152541  | 9.71486448 | 7.57554832 | 8.34543295 | 6.09960467 |
| 6.42509236 | 13.2112761 | 11.7609952 | 11.7849094 | 14.668444  | 10.3352005 | 11.7898399 |
| 11.014444  | 4.99530838 | 4.6928109  | 4.18108091 | 3.10576496 | 3.76703571 | 3.35682941 |
| 1.27089739 | 0.39436645 | 0.44417552 | 0.43040539 | 0          | 0.61818022 | 0.5117118  |
| 0.4471676  | 1.02973462 | 1.98913384 | 1.43468463 | 2.6650821  | 2.02840384 | 2.37434276 |
| 33.8199917 | 21.6244271 | 22.8653832 | 22.1351343 | 13.3254105 | 13.4067835 | 13.6115339 |
| 116.616603 | 84.6573315 | 81.3034317 | 75.2184655 | 49.6082998 | 48.9521461 | 49.779324  |
| 2.91835697 | 1.64319355 | 1.25527864 | 1.51666661 | 1.40598819 | 1.44885989 | 1.00295513 |

|            |            |            |            |            |            |            |
|------------|------------|------------|------------|------------|------------|------------|
| 5.88378421 | 10.1878    | 8.76763847 | 9.20247711 | 15.696704  | 14.6045077 | 15.8630658 |
| 4.84823819 | 3.11111312 | 2.68436508 | 2.80788277 | 3.35758374 | 4.48180659 | 3.4387033  |
| 16.5922715 | 39.1737342 | 40.2461643 | 39.2283768 | 26.839685  | 32.976051  | 35.1034295 |
| 1.76513526 | 2.30047097 | 4.48037913 | 4.03761245 | 3.81925151 | 3.67044505 | 4.66681162 |
| 78.7721031 | 50.3693595 | 52.3161512 | 52.7144123 | 24.3844519 | 42.5771626 | 39.9135205 |
| 25.7709749 | 37.2676296 | 36.4223924 | 37.8141877 | 64.444623  | 60.6202977 | 53.9548923 |
| 107.53204  | 64.3255501 | 61.3155334 | 50.3779259 | 40.7736576 | 27.991973  | 29.2085096 |
| 55.4017122 | 37.3333574 | 33.5255956 | 40.3761245 | 21.6354302 | 25.345389  | 26.1382388 |
| 0          | 1.13928086 | 1.87326196 | 1.78310804 | 2.03553514 | 2.16363077 | 2.0468472  |
| 36.5029973 | 23.5305316 | 24.893141  | 25.3324314 | 26.2940777 | 14.797689  | 16.4157146 |
| 13.250282  | 6.66041118 | 6.87506453 | 4.98040521 | 7.8063822  | 6.52952856 | 5.60836134 |
| 3.69501649 | 4.71048817 | 3.92033174 | 5.51328807 | 5.62395277 | 7.24429944 | 6.52944258 |
| 502.898804 | 354.51353  | 332.841958 | 349.632644 | 220.215524 | 301.478765 | 329.235373 |
| 89.3158444 | 57.9280498 | 56.2364829 | 57.8177905 | 49.2305716 | 46.8657878 | 40.7936648 |
| 19.6283041 | 7.86541978 | 8.51658275 | 6.84549522 | 4.34387397 | 5.62157637 | 5.15805495 |
| 25.2532018 | 32.6447785 | 36.6927601 | 36.5229715 | 49.0417075 | 39.408989  | 45.4400079 |
| 130.337588 | 73.9218004 | 66.4138958 | 74.1117088 | 61.7795409 | 46.7112428 | 47.220765  |
| 11.8852441 | 10.0563445 | 7.57029578 | 6.78400874 | 6.14857523 | 6.31702911 | 5.42414509 |
| 0.28242164 | 1.42410107 | 0.59867135 | 0.47139638 | 0.39871307 | 1.85454066 | 2.19012651 |
| 78.25433   | 59.9437006 | 56.0819871 | 55.2558537 | 22.915509  | 42.5192082 | 39.4018087 |
| 34.573116  | 23.5743501 | 20.0072103 | 19.265765  | 8.89759692 | 19.1249505 | 16.3747776 |
| 32.3843483 | 27.5180146 | 23.8116701 | 22.2171162 | 14.248746  | 18.8544967 | 14.0004349 |
| 6.80165455 | 6.87950365 | 4.48037913 | 4.14008993 | 1.69977677 | 4.3079434  | 3.295424   |
| 39.374284  | 23.6181686 | 23.3481826 | 20.2905397 | 6.40039401 | 11.5329247 | 15.0238585 |
| 12.732509  | 18.1189475 | 20.0265222 | 17.4621615 | 18.802469  | 19.5885857 | 18.9333366 |
| 9.34344933 | 7.20814236 | 7.49304786 | 9.20247711 | 4.32288907 | 6.81930054 | 7.02068591 |
| 85.9973901 | 60.2723393 | 57.7235053 | 53.3292772 | 28.4555222 | 26.4078862 | 25.7084009 |
| 10.2848548 | 4.68857892 | 3.53409216 | 4.07860344 | 3.73531191 | 4.17271648 | 3.8071358  |
| 485.318057 | 258.989212 | 266.428063 | 262.055395 | 79.1340518 | 130.764434 | 120.723048 |
| 944.535647 | 489.605949 | 520.264715 | 506.013268 | 212.870809 | 269.429985 | 255.58981  |
| 0.75312438 | 2.03756    | 1.68014217 | 2.35698189 | 0.10492449 | 1.56476868 | 1.49419846 |
| 71.0761133 | 49.6682636 | 50.2304574 | 52.4274754 | 27.2174132 | 38.8873994 | 39.9135205 |
| 346.154793 | 205.070555 | 227.707545 | 219.752694 | 105.784873 | 148.846206 | 163.03138  |
| 3.83622731 | 6.96714064 | 7.97584733 | 7.52184655 | 5.68690746 | 9.77497471 | 8.00317257 |
| 257.050765 | 153.320913 | 157.566437 | 150.867336 | 96.8872759 | 103.564505 | 106.395118 |
| 107.579111 | 44.2347703 | 44.9389752 | 39.9867101 | 27.5741565 | 29.1896972 | 28.2055545 |
| 60.5088369 | 12.7730912 | 16.0868785 | 13.2195941 | 4.95243602 | 12.9431483 | 10.0500198 |
| 11.4851468 | 3.81220903 | 3.24441248 | 4.85743224 | 1.3430335  | 2.10567637 | 2.39481123 |
| 1.45917848 | 0.32863871 | 0.44417552 | 0.59436935 | 0.81841104 | 0.65681648 | 0.34796402 |
| 584.801081 | 357.339823 | 399.371726 | 345.062148 | 254.294999 | 172.974552 | 188.985402 |
| 18.7810392 | 7.40532559 | 5.71634579 | 8.95653118 | 2.6650821  | 4.07612582 | 2.51762206 |
| 1.57685417 | 3.2425686  | 2.41399738 | 2.25450441 | 2.24538413 | 2.1249945  | 3.39776636 |
| 0.65898383 | 7.29577935 | 0          | 6.31261236 | 11.5416941 | 0          | 1.26904527 |

|            |            |            |            |            |            |            |
|------------|------------|------------|------------|------------|------------|------------|
| 0.25888651 | 1.18309935 | 0.81110312 | 0.63536034 | 0.98629022 | 1.46817802 | 1.16670291 |
| 130.878896 | 183.533765 | 176.839792 | 175.830849 | 330.113437 | 197.315399 | 218.480471 |
| 51.1653875 | 71.6870571 | 65.6800406 | 70.7094566 | 123.768931 | 70.62709   | 82.4879423 |
| 7.01347078 | 11.2394439 | 12.3982905 | 12.0718464 | 8.79267243 | 19.3760862 | 21.2258055 |
| 39.044792  | 53.6119281 | 55.1743241 | 60.6256733 | 41.2772951 | 72.5589032 | 70.7185709 |
| 3.03603265 | 1.33646408 | 1.15871874 | 0.81981979 | 0.27280368 | 1.10113351 | 0.5117118  |
| 1.81220554 | 5.03912688 | 3.84308382 | 4.42702685 | 9.96782674 | 9.63974779 | 8.45347895 |
| 29.1600346 | 12.4444525 | 16.8400457 | 15.33063   | 12.9057125 | 11.571561  | 9.88627199 |
| 2.54179478 | 2.56338193 | 1.79601405 | 2.07004496 | 1.63682207 | 1.17840604 | 1.65794623 |
| 19.3223474 | 15.7308396 | 15.1985275 | 16.0479723 | 6.84107688 | 11.3011071 | 11.360002  |
| 100.848061 | 67.4366632 | 60.1761266 | 59.1704931 | 64.1508344 | 39.2158076 | 39.156187  |
| 1.36503794 | 1.27073634 | 1.08147083 | 1.31171166 | 3.12674986 | 4.40453406 | 3.09073928 |
| 3.38905971 | 2.14710623 | 1.33252655 | 2.11103595 | 1.93061065 | 1.29431483 | 1.35091915 |
| 9.72001152 | 12.7730912 | 15.5461431 | 15.4740985 | 17.0817073 | 18.9510873 | 17.4800751 |
| 26.6888452 | 43.2488542 | 38.4308382 | 38.2650886 | 64.5285626 | 44.1805675 | 45.1125124 |
| 21.1816232 | 13.4522778 | 12.2631067 | 13.1581076 | 19.9146686 | 13.9283731 | 12.792795  |
| 2.73007588 | 0.67918667 | 1.12009478 | 1.06576572 | 0.65053185 | 1.46817802 | 0.73686499 |
| 12.8266496 | 12.3568155 | 9.34699785 | 11.2520266 | 6.23251482 | 5.2158956  | 3.90947816 |
| 2.94189211 | 13.3427316 | 10.8919562 | 9.16148612 | 4.61667765 | 8.82838625 | 9.82486658 |
| 703.865338 | 447.0801   | 455.202657 | 433.459217 | 175.895418 | 267.015218 | 248.589593 |
| 30.9957752 | 49.8216283 | 42.331858  | 44.5981964 | 55.1063432 | 47.3873774 | 51.0279008 |
| 1.24736225 | 2.97965763 | 2.06638176 | 2.2954954  | 4.25993437 | 3.28408241 | 3.60245108 |
| 180.938132 | 118.222298 | 131.109026 | 126.764635 | 79.51178   | 97.6531564 | 104.982793 |
| 30.9251698 | 20.463237  | 19.5823467 | 20.7004496 | 15.4239003 | 13.3874654 | 14.3688674 |
| 35.255635  | 52.9327415 | 48.782059  | 52.038061  | 131.302509 | 128.600804 | 134.109429 |
| 7.43710325 | 9.00470064 | 8.69039056 | 9.18198162 | 12.9686672 | 12.8079214 | 12.6290472 |
| 49.4237874 | 32.7543247 | 33.7573393 | 34.2274761 | 32.2747737 | 22.2931241 | 24.4393556 |
| 102.095424 | 59.2206954 | 57.4145136 | 63.7819794 | 63.8360609 | 55.9453098 | 63.1657047 |
| 16.168639  | 22.8075264 | 20.238954  | 18.4869362 | 28.0987789 | 25.055617  | 24.4393556 |
| 327.915062 | 230.81392  | 217.781187 | 224.384676 | 226.07031  | 188.873375 | 171.218769 |
| 14.61532   | 11.4585363 | 8.7483265  | 7.02995468 | 5.33016419 | 7.59202581 | 6.95928049 |
| 256.933089 | 192.889013 | 186.321974 | 180.175894 | 181.351492 | 131.247388 | 141.887448 |
| 1.22382712 | 0.7887329  | 0.79179114 | 1.10675671 | 0.86038083 | 0.65681648 | 0.85967583 |
| 1.48271362 | 0.48200344 | 0.4634875  | 0.43040539 | 0.33575837 | 0.01931813 | 0          |
| 3.29491916 | 5.89358752 | 5.54253798 | 5.84121598 | 4.42781356 | 8.03634285 | 5.97679383 |
| 376.256233 | 216.748183 | 204.552482 | 212.681748 | 179.966489 | 175.389319 | 184.032032 |
| 23.3703909 | 16.5414817 | 15.5847671 | 14.4083328 | 6.65221279 | 12.2670137 | 10.6026685 |
| 10.1201088 | 15.2050176 | 14.5226082 | 13.9574319 | 27.7630206 | 20.1488115 | 20.5298775 |
| 0.61191356 | 1.68701204 | 1.79601405 | 1.96756749 | 1.84667106 | 1.60340494 | 3.09073928 |
| 118.475879 | 176.172257 | 153.549545 | 167.448192 | 237.045412 | 196.36881  | 192.874412 |
| 41.9160787 | 118.068934 | 107.355291 | 109.691888 | 106.813133 | 132.638293 | 119.842904 |
| 1.15322171 | 0.24100172 | 0.34761562 | 0.47139638 | 0.54560736 | 0.27045385 | 0.3684325  |
| 3.48320025 | 6.20031698 | 7.01024838 | 5.18536015 | 20.7120947 | 18.1204077 | 16.6613362 |



|            |            |            |            |            |            |            |
|------------|------------|------------|------------|------------|------------|------------|
| 1.05908116 | 3.17684086 | 5.11767444 | 4.26306289 | 6.84107688 | 8.1329335  | 11.9126507 |
| 2.00048663 | 2.05946925 | 2.35606144 | 2.02905397 | 3.04281027 | 2.26022143 | 2.53809053 |
| 0.25888651 | 0.39436645 | 1.08147083 | 1.06576572 | 1.19613921 | 0.71477088 | 1.14623443 |
| 0          | 0.15336473 | 0.21243177 | 0.7788288  | 2.20341433 | 0.69545275 | 1.43279304 |
| 3.1301732  | 2.4100172  | 1.6608302  | 2.07004496 | 1.21712411 | 0.83067967 | 1.82169401 |
| 74.2298216 | 100.782538 | 90.1483181 | 92.475672  | 241.515196 | 218.700571 | 207.059063 |
| 1.45917848 | 1.90610451 | 3.30234841 | 3.4842341  | 4.44879846 | 2.66590219 | 2.02637873 |
| 2.25937314 | 1.13928086 | 1.1973427  | 0.55337836 | 0.79742614 | 1.56476868 | 1.35091915 |
| 13.5091686 | 20.7699664 | 26.3415394 | 22.2990982 | 29.0430994 | 29.2862879 | 25.2580945 |
| 53.3776904 | 84.9202425 | 85.3589473 | 78.8666635 | 120.72612  | 99.8167872 | 90.2659617 |
| 0.75312438 | 0.67918667 | 1.00422291 | 1.72162155 | 1.90962575 | 2.82044725 | 1.35091915 |
| 18.0043797 | 14.8325604 | 13.4990733 | 14.6952697 | 4.11304008 | 8.38406922 | 13.7752817 |
| 3.50673539 | 1.29264559 | 1.52564634 | 0.7788288  | 0.77644124 | 1.08181538 | 0.65499111 |
| 5.69550312 | 8.54460644 | 13.2866416 | 10.1452699 | 5.62395277 | 6.58748296 | 9.41549714 |
| 22.35838   | 16.1690245 | 13.0742098 | 15.1256751 | 11.2688904 | 10.6829269 | 12.833732  |
| 48.2705657 | 84.2629651 | 89.8779504 | 101.104275 | 127.168484 | 96.0883878 | 88.9969164 |
| 9.81415207 | 17.0015759 | 15.5268311 | 15.7405399 | 104.022141 | 60.4464345 | 66.3587863 |
| 2.07109204 | 4.4475772  | 4.38381924 | 4.69346828 | 4.07107029 | 5.48634944 | 5.1989919  |
| 40.0332678 | 26.3349152 | 26.2256675 | 30.66126   | 11.5836639 | 25.5772066 | 33.5068887 |
| 8.943352   | 5.60876731 | 6.21845724 | 6.9479727  | 3.52546293 | 4.09544395 | 4.50306385 |
| 27.7714615 | 17.3083054 | 14.0977447 | 14.3673418 | 10.7022982 | 9.25338515 | 8.96519075 |
| 0.30595678 | 1.42410107 | 1.33252655 | 1.41418913 | 0.50363756 | 1.56476868 | 2.7837122  |
| 76.7480813 | 67.2394799 | 61.9335167 | 63.7614839 | 25.4546817 | 36.1635428 | 44.3756474 |
| 11.9558495 | 23.0266189 | 24.1785977 | 31.1736474 | 51.9376235 | 43.0601159 | 41.0597549 |
| 8.14315735 | 16.6510279 | 13.1128338 | 16.0479723 | 17.1866318 | 17.5795    | 16.6203993 |
| 118.522949 | 78.5227423 | 71.0294588 | 79.5225194 | 66.9628108 | 56.5055356 | 57.8643704 |
| 1.15322171 | 2.08137849 | 2.20156561 | 1.98806298 | 2.5811425  | 2.43408461 | 2.49715359 |
| 21.5817205 | 11.3270809 | 11.4906275 | 13.4450445 | 12.6748786 | 11.2045165 | 9.23128089 |
| 109.038289 | 53.1956524 | 54.7880845 | 56.1166644 | 52.672095  | 39.408989  | 36.7204388 |
| 40.1509435 | 31.8341363 | 32.0578852 | 31.4605843 | 18.9493632 | 26.5044769 | 22.3720399 |
| 15.297839  | 12.050086  | 10.0036051 | 11.8463959 | 4.93145112 | 11.0306533 | 13.181696  |
| 15.815612  | 11.2613531 | 13.8660009 | 12.6457202 | 5.39311889 | 9.73633845 | 8.33066812 |
| 3.55380567 | 1.70892129 | 2.2981255  | 2.00855848 | 1.69977677 | 2.04772197 | 1.61700929 |
| 5.57782743 | 6.20031698 | 9.63667753 | 8.62860326 | 10.2406304 | 10.2192917 | 10.6436055 |
| 118.287598 | 250.9047   | 236.784175 | 230.533324 | 436.318007 | 363.799059 | 394.980105 |
| 17.6984229 | 8.61033419 | 8.90282233 | 8.8745492  | 5.05736051 | 6.47157417 | 4.70774857 |
| 64.1567831 | 42.5477582 | 46.7349892 | 44.7006739 | 36.6186477 | 36.9362681 | 31.3781676 |
| 58.131788  | 41.4084774 | 44.0313122 | 44.413737  | 24.4264217 | 29.7692412 | 29.1266357 |
| 0          | 0.08763699 | 0.63729531 | 0.63536034 | 1.17515431 | 1.00454286 | 1.43279304 |
| 2.63593533 | 4.84194365 | 5.46529006 | 4.75495477 | 10.3875247 | 4.44317032 | 4.74868551 |
| 0.35302705 | 0.92018839 | 0.7338552  | 0.63536034 | 0.86038083 | 1.3329511  | 1.08482902 |
| 3.38905971 | 6.9014129  | 9.15387805 | 7.29639611 | 4.82652663 | 6.20112032 | 7.69614549 |
| 7.46063838 | 15.9937505 | 13.9046249 | 15.3511255 | 23.7129352 | 12.30565   | 13.0179482 |

|            |            |            |            |            |            |            |
|------------|------------|------------|------------|------------|------------|------------|
| 5.5542923  | 9.96870752 | 9.71392545 | 9.48941404 | 8.24706507 | 9.00224944 | 10.623137  |
| 16.9217634 | 23.0047097 | 21.6680405 | 23.4468459 | 32.6944717 | 35.9124071 | 33.8753212 |
| 4.40107059 | 1.90610451 | 3.36028435 | 2.99234222 | 0.52462246 | 2.70453846 | 1.96497332 |
| 100.871597 | 80.5603023 | 85.4555072 | 83.7855823 | 37.9616812 | 65.7589208 | 65.4991105 |
| 18.4515473 | 12.0281768 | 10.4284687 | 12.9326571 | 5.51902828 | 9.67838405 | 9.33362325 |
| 37.6091487 | 26.1596413 | 30.416367  | 26.6031521 | 16.4731452 | 21.9260796 | 24.2346709 |
| 21.158088  | 25.3489991 | 31.8647654 | 21.7047289 | 46.670414  | 36.1249065 | 38.3579166 |
| 1.15322171 | 2.36619871 | 0.57935937 | 1.57815309 | 2.6650821  | 2.14431263 | 2.21059498 |
| 101.295229 | 66.8451135 | 65.2938011 | 66.7333307 | 52.8399741 | 51.2316856 | 55.4900277 |
| 225.466611 | 133.098677 | 143.854932 | 141.767337 | 84.7999744 | 99.7974691 | 81.0551493 |
| 0.30595678 | 0.39436645 | 0.77247916 | 1.00427924 | 1.95159555 | 1.15908791 | 1.67841471 |
| 30.8074941 | 48.7480752 | 51.3312402 | 51.5461691 | 51.8117141 | 63.9816527 | 51.4986756 |
| 203.649539 | 289.881251 | 300.629577 | 266.707872 | 568.082184 | 349.638868 | 383.149328 |
| 12.5206928 | 20.0688705 | 20.6831295 | 23.6313054 | 13.430335  | 25.5772066 | 22.6176616 |
| 11.2497954 | 17.9217643 | 16.8593577 | 17.0317561 | 34.7090219 | 28.5521989 | 23.3340581 |
| 11.7675684 | 19.1925006 | 20.7217535 | 19.6756749 | 35.4434934 | 37.0908131 | 40.3638269 |
| 32.0548564 | 48.5947105 | 48.8979309 | 49.5171151 | 89.227788  | 77.0020735 | 70.6162285 |
| 4.98944901 | 1.79655828 | 2.54918123 | 2.25450441 | 2.35030862 | 2.74317472 | 1.84216248 |
| 0.11767568 | 1.05164387 | 0.71454322 | 1.12725221 | 2.81197638 | 2.31817582 | 1.22810832 |
| 5.62489771 | 4.38184946 | 3.1285406  | 3.05382871 | 1.86765596 | 3.11021923 | 2.23106345 |
| 116.216506 | 83.4085044 | 84.3933483 | 84.6668885 | 84.9678536 | 62.0691576 | 63.6364796 |
| 1.67099472 | 3.68075355 | 3.9589557  | 2.60292782 | 3.18970456 | 4.77157856 | 3.82760427 |
| 20.2166826 | 33.4992391 | 28.9872805 | 31.2761249 | 39.451609  | 51.3862307 | 46.8932694 |
| 38.5034839 | 25.9843673 | 30.2425591 | 28.1403142 | 27.9099149 | 19.8397214 | 19.8953548 |
| 7.13114647 | 6.30986322 | 6.17983329 | 4.91891872 | 1.97258045 | 3.41930934 | 2.61996442 |
| 5.62489771 | 4.20657548 | 3.4954682  | 3.52522508 | 3.54644783 | 3.30340054 | 4.50306385 |
| 2.00048663 | 2.23474322 | 2.62642915 | 2.58243233 | 4.55372295 | 3.53521813 | 4.74868551 |
| 17.2512553 | 9.94679827 | 12.2437947 | 11.2520266 | 8.98153651 | 5.50566757 | 7.04115438 |
| 136.150767 | 96.0720494 | 95.6715441 | 92.8035999 | 67.4034936 | 76.2873026 | 79.9498518 |
| 33.4904997 | 22.2597953 | 19.8527144 | 22.5860351 | 23.9437691 | 13.8317824 | 13.5910654 |
| 12.7560442 | 34.550883  | 33.8152753 | 34.6168905 | 34.1214448 | 37.4192214 | 40.281953  |
| 121.723728 | 63.7340004 | 71.4350104 | 69.8076549 | 74.3914648 | 56.6021263 | 54.9578474 |
| 4.35400032 | 2.69483742 | 3.20578852 | 3.0948197  | 1.86765596 | 1.60340494 | 3.41823483 |
| 14.1916875 | 8.85133591 | 8.13034317 | 8.03423391 | 9.02350631 | 6.68407362 | 8.39207353 |
| 30.1485103 | 18.2723122 | 17.1490374 | 15.9045039 | 10.7652529 | 9.29202141 | 10.3979838 |
| 176.160499 | 126.32872  | 125.354056 | 123.075446 | 121.439607 | 97.5565658 | 104.75764  |
| 15.2743038 | 8.25978623 | 9.46286972 | 7.11193665 | 6.5472883  | 6.25907472 | 4.99430718 |
| 10.5672764 | 6.24413548 | 7.80203952 | 7.35788259 | 4.84751153 | 4.75226043 | 5.99726231 |
| 16.3804553 | 8.8951544  | 8.03378327 | 8.52612579 | 6.4633487  | 6.12384779 | 4.62587468 |
| 2.75361101 | 8.8951544  | 8.47795879 | 9.59189151 | 9.52714387 | 14.6045077 | 11.6260921 |
| 5.88378421 | 29.5336654 | 28.9486565 | 25.6193684 | 122.593776 | 126.842854 | 120.70258  |
| 0.42363246 | 0.76682366 | 2.81954894 | 0.7583333  | 2.87493108 | 2.72385659 | 3.25448705 |
| 0.35302705 | 1.48982882 | 1.40977447 | 0.96328825 | 2.6021274  | 2.26022143 | 2.88605456 |

|            |            |            |            |            |            |            |
|------------|------------|------------|------------|------------|------------|------------|
| 3.48320025 | 29.2269359 | 26.2642915 | 14.3673418 | 0.96530533 | 22.8147137 | 23.415932  |
| 4.07157868 | 3.39593333 | 1.44839843 | 2.35698189 | 2.81197638 | 1.50681428 | 2.59949595 |
| 6.98993565 | 1.53364731 | 1.42908645 | 1.66013507 | 1.67879187 | 0.4249989  | 0.59358569 |
| 3.1301732  | 3.76839053 | 4.53831507 | 3.32027014 | 6.16956013 | 4.3079434  | 4.76915398 |
| 3.88329758 | 7.84351053 | 5.11767444 | 9.07950414 | 7.47062383 | 7.66929834 | 8.28973117 |
| 56.3195825 | 34.8795217 | 37.0017518 | 36.5229715 | 19.2221669 | 33.8067307 | 36.249664  |
| 6.84872482 | 3.11111312 | 3.8623958  | 3.13581069 | 4.84751153 | 4.13408021 | 3.41823483 |
| 129.607999 | 71.1612352 | 81.1103119 | 73.8452673 | 55.4001318 | 48.9135098 | 52.6653785 |
| 301.602779 | 201.784168 | 203.026835 | 209.402469 | 179.001183 | 199.981301 | 171.628138 |
| 76.9834327 | 56.438221  | 54.6142767 | 53.7596825 | 54.0990681 | 39.7373972 | 33.7320419 |
| 11.9087792 | 16.1471153 | 18.1532603 | 15.535585  | 24.9510442 | 26.0022055 | 23.5387428 |
| 155.543719 | 108.932778 | 110.580392 | 111.208554 | 98.5660677 | 76.345257  | 80.2159419 |
| 13.1796766 | 21.5586993 | 19.9299623 | 17.4621615 | 15.6127644 | 22.4863055 | 25.0534098 |
| 0.61191356 | 2.60720043 | 1.06215885 | 1.22972968 | 1.59485228 | 1.23636044 | 1.65794623 |
| 15.9332877 | 8.87324515 | 9.07663014 | 6.49707181 | 6.35842421 | 7.39884449 | 8.28973117 |
| 43.3752572 | 33.1048727 | 35.2443617 | 30.3333321 | 7.15585035 | 13.8511005 | 15.2490117 |
| 15.2036984 | 6.46322795 | 7.76341557 | 7.80878347 | 5.93872624 | 8.07497911 | 8.2692627  |
| 0.49423787 | 0.92018839 | 0.67591927 | 0.79932429 | 1.09121472 | 0.9079522  | 1.37138763 |
| 1.69452985 | 2.51956344 | 2.16294165 | 2.60292782 | 2.81197638 | 2.37613022 | 2.72230678 |
| 0.21181623 | 0.98591613 | 0.48279948 | 1.00427924 | 0.46166776 | 1.13976978 | 1.67841471 |
| 102.142494 | 82.7074085 | 81.882791  | 76.0792763 | 37.4370587 | 60.9680241 | 64.7213086 |
| 213.557832 | 162.654252 | 151.811467 | 168.390984 | 105.616994 | 111.89062  | 106.865892 |
| 387.105931 | 243.083099 | 230.507782 | 235.903144 | 203.112832 | 238.385747 | 250.943467 |
| 101.718861 | 157.089303 | 154.746888 | 152.527471 | 212.954749 | 238.173247 | 257.698063 |
| 64.2509236 | 40.3349243 | 47.0439809 | 44.5162144 | 22.1600527 | 28.4556082 | 27.1411939 |
| 22.1465638 | 14.087646  | 12.3210426 | 11.7029275 | 8.41494425 | 7.10907252 | 5.32180273 |
| 2.4241191  | 1.59937505 | 1.54495832 | 1.88558551 | 0.69250165 | 0.8499978  | 0.75733347 |
| 1.01201088 | 0.67918667 | 0.4634875  | 0.61486484 | 0.18886409 | 0.3670445  | 0.85967583 |
| 8.26083304 | 6.28795397 | 5.07905048 | 5.16486466 | 5.85478665 | 5.23521373 | 3.99135205 |
| 43.9401005 | 29.2926636 | 33.3710997 | 31.3171159 | 20.3133816 | 23.8192566 | 25.6060585 |
| 151.542746 | 77.4491892 | 78.0590192 | 84.5849065 | 40.4169143 | 57.3941697 | 62.2036865 |
| 29.9602292 | 10.4945295 | 12.1279228 | 12.4407653 | 7.70145771 | 5.96930274 | 4.70774857 |
| 3.41259484 | 4.79812516 | 5.65840985 | 5.53378356 | 6.44236381 | 6.22043845 | 9.88627199 |
| 0          | 0.3724572  | 0.28967969 | 0.40990989 | 2.91690088 | 1.02386099 | 0.30702708 |
| 24.9472451 | 42.3067565 | 33.8345872 | 33.8175662 | 57.8973347 | 41.0896664 | 48.2032516 |
| 1.95341636 | 2.8701114  | 2.97404477 | 3.40225212 | 6.65221279 | 2.62726593 | 3.15214469 |
| 2.09462718 | 1.88419527 | 0.8304151  | 0.96328825 | 0.83939594 | 0.59886209 | 0.5117118  |
| 9.93182775 | 7.44914408 | 4.51900309 | 7.05045017 | 3.98713069 | 3.11021923 | 3.72526191 |
| 8.87274659 | 5.25821935 | 3.76583591 | 4.32454938 | 4.70061724 | 4.28862527 | 4.03228899 |
| 6.56630318 | 4.71048817 | 3.16716456 | 3.66869355 | 6.88304667 | 3.34203681 | 2.96792845 |
| 14.6859254 | 20.7480572 | 19.6402827 | 21.8481973 | 31.4563627 | 25.6544791 | 26.6294821 |
| 7.86073571 | 14.26292   | 10.2353489 | 11.8054049 | 10.1986606 | 15.0101884 | 14.6349575 |
| 15.5331903 | 14.525831  | 9.32768587 | 10.8831077 | 5.95971114 | 5.38975878 | 7.88036173 |

|            |            |            |            |            |            |            |
|------------|------------|------------|------------|------------|------------|------------|
| 3.5773408  | 1.16119011 | 1.21665468 | 2.11103595 | 1.40598819 | 1.52613242 | 1.22810832 |
| 2.28290827 | 1.9937415  | 1.12009478 | 0.96328825 | 1.07022982 | 1.25567857 | 1.43279304 |
| 31.6547591 | 49.2081694 | 45.5183345 | 47.6520251 | 36.9334212 | 58.9782565 | 58.4988931 |
| 7.67245461 | 4.4475772  | 5.40735413 | 5.06238719 | 4.67963234 | 4.28862527 | 2.57902748 |
| 1.20029198 | 2.01565075 | 1.62220624 | 2.23400892 | 2.70705189 | 1.93181318 | 1.30998221 |
| 9.60233584 | 7.20814236 | 6.93300047 | 6.43558533 | 4.93145112 | 4.21135274 | 7.36864993 |
| 6.42509236 | 5.25821935 | 5.58116194 | 4.38603586 | 4.02910049 | 3.32271868 | 4.27791066 |
| 26.6653101 | 15.3802916 | 16.0096306 | 14.6747742 | 10.0307814 | 13.8124643 | 11.012038  |
| 8.56678982 | 3.70266279 | 6.21845724 | 3.89414399 | 3.06379517 | 4.34657966 | 4.9738387  |
| 26.5947046 | 18.6228602 | 20.1230821 | 18.5074317 | 10.5554039 | 16.2465489 | 19.6906701 |
| 1.10615143 | 1.70892129 | 1.29390259 | 1.5371621  | 3.46250823 | 2.80112912 | 2.76324372 |
| 0.65898383 | 1.00782538 | 0.75316718 | 0.96328825 | 1.53189758 | 1.79658626 | 2.10825262 |
| 4.49521114 | 13.3208224 | 13.1128338 | 15.494594  | 12.3181354 | 16.555639  | 16.2929037 |
| 0.32949192 | 0.87636989 | 0.96559895 | 1.12725221 | 1.17515431 | 1.35226923 | 1.92403637 |
| 11.1556549 | 16.8920297 | 17.1104134 | 16.3554048 | 19.0962575 | 16.845411  | 20.2637873 |
| 185.315668 | 72.4976993 | 83.775365  | 71.9596818 | 54.728615  | 42.9442071 | 43.1475391 |
| 14.9448119 | 37.7277238 | 32.7338044 | 36.3385121 | 37.2272097 | 44.6248845 | 43.0042597 |
| 0.70605411 | 1.05164387 | 1.58358228 | 0.88130627 | 2.01455025 | 0.71477088 | 2.39481123 |
| 6.87225996 | 8.12833075 | 8.07240723 | 9.38693656 | 11.8564676 | 13.773828  | 12.5676418 |
| 2.61240019 | 6.63850193 | 9.71392545 | 3.32027014 | 2.95887067 | 5.35112252 | 6.14054161 |
| 1.9769515  | 3.2425686  | 3.05129268 | 3.34076563 | 3.31561395 | 4.63635164 | 2.88605456 |
| 4.80116792 | 8.8951544  | 8.47795879 | 9.59189151 | 22.4118715 | 12.9238302 | 12.6495157 |
| 22.9938287 | 17.3740331 | 18.2111962 | 15.6175669 | 12.5489692 | 9.07952196 | 10.3775153 |
| 3.08310293 | 1.57746581 | 2.51055727 | 1.96756749 | 2.49720291 | 1.37158736 | 0.8801443  |
| 15.6273309 | 9.66197806 | 10.9112681 | 12.7072067 | 8.24706507 | 9.54315713 | 8.84237992 |
| 26.147537  | 18.7324064 | 20.1423941 | 18.0565308 | 14.5215497 | 12.2476956 | 13.3045068 |
| 20.7109204 | 15.3364731 | 12.861778  | 15.453603  | 10.0727512 | 12.4795132 | 11.6260921 |
| 17.6042824 | 10.6478942 | 11.4520036 | 11.5389635 | 3.54644783 | 11.2238346 | 11.8307768 |
| 64.0155722 | 41.6713884 | 42.9498413 | 42.9175659 | 37.9406963 | 38.6748999 | 35.9631054 |
| 6.42509236 | 13.7151888 | 12.9776499 | 13.3630625 | 9.94684184 | 13.3874654 | 14.614489  |
| 0.70605411 | 1.22691785 | 0.54073541 | 1.39369364 | 1.2800788  | 2.20226703 | 1.59654082 |
| 1.55331903 | 3.72457204 | 1.6608302  | 1.84459452 | 3.16871966 | 2.64658406 | 1.49419846 |
| 43.3517221 | 27.3427406 | 26.650531  | 30.866215  | 13.2624558 | 21.5783533 | 23.2726527 |
| 108.332235 | 71.9718774 | 73.8683197 | 73.2713935 | 59.9328698 | 58.7464389 | 58.2942084 |
| 22.4525206 | 15.7308396 | 13.0355858 | 12.7277022 | 6.5263034  | 12.1124687 | 11.5646867 |
| 78.1366544 | 45.2645049 | 39.5123091 | 42.466665  | 19.6628498 | 25.345389  | 26.2815181 |
| 17.6513526 | 43.2050357 | 40.2075403 | 47.0576558 | 59.9118849 | 59.3066647 | 61.6305693 |
| 17.6748878 | 9.81534279 | 14.1749926 | 14.1009003 | 10.6183586 | 10.0261104 | 9.35409172 |
| 3.08310293 | 3.70266279 | 5.92877756 | 5.20585565 | 6.79910708 | 4.01817142 | 5.30133426 |
| 4.33046518 | 1.97183226 | 1.40977447 | 2.04954947 | 0.86038083 | 0.92727033 | 1.43279304 |
| 45.5169547 | 86.8482563 | 73.2310244 | 77.4114834 | 81.6732245 | 78.8566142 | 86.9296007 |
| 12.1676658 | 12.9483652 | 17.5739009 | 14.1009003 | 28.287643  | 22.1772154 | 20.2433188 |
| 4.73056251 | 2.54147269 | 3.88170778 | 3.79166652 | 2.6650821  | 1.98976758 | 2.08778415 |

|            |            |            |            |            |            |            |
|------------|------------|------------|------------|------------|------------|------------|
| 25.1590613 | 15.8184765 | 14.6577921 | 15.7815309 | 11.35283   | 12.6147401 | 12.4243625 |
| 13.9563362 | 21.9968843 | 18.423628  | 17.9950443 | 26.5878663 | 28.571517  | 24.889662  |
| 5.95438962 | 4.57903268 | 2.70367706 | 3.4637386  | 4.07107029 | 3.38067307 | 2.76324372 |
| 0.91787034 | 2.08137849 | 2.12431769 | 2.2954954  | 2.85394618 | 2.78181098 | 1.78075707 |
| 16.0980336 | 25.6557286 | 23.1550628 | 23.1804045 | 47.8245834 | 26.9294758 | 31.1734829 |
| 22.9702936 | 68.3568516 | 65.0041214 | 63.2695921 | 117.179673 | 75.3020779 | 90.0408085 |
| 84.6558873 | 49.0986232 | 55.8695553 | 49.3326557 | 31.8340909 | 37.4385395 | 40.8346017 |
| 11.1085846 | 7.95305677 | 8.76763847 | 5.63626104 | 3.04281027 | 5.54430384 | 5.15805495 |
| 158.673893 | 108.604139 | 118.247248 | 106.556077 | 67.3615238 | 60.1180263 | 53.4841174 |
| 31.4194077 | 18.0532198 | 21.5907925 | 19.5117109 | 16.6200395 | 15.7442774 | 18.9128682 |
| 33.1610078 | 60.1847023 | 65.7186646 | 61.0560787 | 114.409666 | 83.9372828 | 93.6023226 |
| 3.29491916 | 1.94992301 | 2.00844582 | 1.51666661 | 0.98629022 | 0.38636264 | 0.65499111 |
| 3.93036785 | 1.51173806 | 3.01266873 | 2.2954954  | 1.76273146 | 1.48749615 | 1.47372999 |
| 3.38905971 | 1.2488271  | 1.71876613 | 1.98806298 | 1.04924492 | 1.08181538 | 0.90061277 |
| 1.03554602 | 1.27073634 | 1.37115051 | 1.35270265 | 2.37129352 | 2.04772197 | 2.29246887 |
| 1.69452985 | 0.74491441 | 1.23596666 | 0.73783781 | 0.73447144 | 1.25567857 | 0.8801443  |
| 30.5486076 | 19.3458654 | 20.258266  | 19.142792  | 15.4239003 | 14.8170071 | 16.1086875 |
| 56.3195825 | 37.6619961 | 41.8297466 | 41.2984218 | 16.8508734 | 34.7919554 | 29.6383475 |
| 785.132165 | 370.332007 | 389.213625 | 387.446831 | 108.156166 | 156.863231 | 154.72118  |
| 4.30693004 | 2.60720043 | 3.24441248 | 3.05382871 | 2.24538413 | 3.24544615 | 2.66090136 |
| 0.4471676  | 1.33646408 | 0.92697499 | 0.7788288  | 1.86765596 | 1.10113351 | 1.16670291 |
| 3.81269217 | 5.60876731 | 5.07905048 | 4.30405388 | 16.0534473 | 15.8795044 | 13.6524708 |
| 3.01249752 | 8.43506021 | 9.50149368 | 8.8540537  | 14.3746554 | 18.023817  | 16.9478948 |
| 7.08407619 | 5.2801286  | 4.6928109  | 5.14436916 | 1.99356535 | 4.07612582 | 3.70479344 |
| 6.21327613 | 3.98748301 | 5.40735413 | 3.4637386  | 4.61667765 | 5.83407582 | 3.15214469 |
| 3.67148135 | 3.11111312 | 2.45262134 | 2.50045035 | 3.48349313 | 1.71931373 | 2.16965804 |
| 175.407375 | 110.334969 | 118.594863 | 120.226572 | 83.6038352 | 97.884974  | 87.1752224 |
| 27.7949966 | 21.0547866 | 19.8140905 | 19.6961704 | 17.4804204 | 16.6135934 | 14.9419846 |
| 2.37704882 | 0.52582194 | 1.15871874 | 0.69684682 | 0.46166776 | 1.10113351 | 0.24562166 |
| 36.7148135 | 16.8263019 | 22.8653832 | 21.7457199 | 7.74342751 | 12.30565   | 13.0384167 |
| 0.21181623 | 0.30672946 | 0.25105573 | 0.02049549 | 2.26636903 | 1.71931373 | 2.76324372 |
| 128.501847 | 81.7434017 | 83.0221978 | 82.3918886 | 56.2185428 | 67.0532356 | 65.9698854 |
| 499.956912 | 344.522914 | 369.592654 | 343.012599 | 328.28775  | 281.600408 | 269.52884  |
| 54.2955607 | 32.1408658 | 31.3433419 | 34.9653139 | 19.4739857 | 28.3010631 | 28.2055545 |
| 2510.89315 | 3816.91952 | 3673.17703 | 3762.89084 | 7443.76316 | 5153.65258 | 5018.767   |
| 0.58837842 | 1.86228602 | 1.13940676 | 1.31171166 | 4.23894948 | 1.50681428 | 0.94154971 |
| 38.4564136 | 54.6854812 | 53.1465663 | 45.1925658 | 91.3472627 | 58.2441675 | 60.5252718 |
| 23.7234179 | 16.6729372 | 15.5268311 | 20.3520262 | 10.0937361 | 13.6386011 | 17.0911741 |
| 10.496671  | 6.17840774 | 5.40735413 | 4.16058542 | 5.66592257 | 3.11021923 | 2.43574817 |
| 1.60038931 | 0.3724572  | 0.52142343 | 0.61486484 | 0.29378858 | 0.54090769 | 0.38890097 |
| 3.1301732  | 0.70109591 | 1.1007828  | 1.20923419 | 1.17515431 | 0.38636264 | 0.40936944 |
| 78.1131192 | 37.6400869 | 37.0596877 | 34.8833319 | 17.8791334 | 21.9260796 | 21.1644001 |
| 48.2470306 | 29.7527578 | 29.9721914 | 27.8123863 | 22.5377809 | 20.5931285 | 22.3925084 |

|            |            |            |            |            |            |            |
|------------|------------|------------|------------|------------|------------|------------|
| 5.22480038 | 4.33803096 | 2.78092498 | 3.79166652 | 2.53917271 | 3.18749175 | 2.4152797  |
| 31.1605212 | 100.278625 | 103.666703 | 93.7668882 | 288.01773  | 220.36193  | 238.785195 |
| 8.91981687 | 12.5539987 | 13.0935218 | 10.6986482 | 36.555693  | 30.1942401 | 27.3049417 |
| 1.3415028  | 2.49765419 | 2.62642915 | 2.54144134 | 3.71432702 | 2.14431263 | 2.37434276 |
| 2.98896238 | 3.52738881 | 4.90524267 | 3.19729717 | 6.96698627 | 5.48634944 | 4.1755683  |
| 2.44765423 | 5.80595053 | 5.48460204 | 5.26734213 | 4.88948133 | 5.56362197 | 6.46803716 |
| 3.67148135 | 4.90767139 | 6.68194474 | 5.98468445 | 4.49076826 | 7.86247966 | 7.53239771 |
| 2.56532992 | 5.58685806 | 7.02956036 | 6.10765741 | 9.65305326 | 4.81021483 | 5.05571259 |
| 5.20126524 | 7.66823655 | 7.20336817 | 7.58333303 | 9.33827978 | 8.88634065 | 8.10551493 |
| 8.30790331 | 5.36776559 | 5.25285829 | 5.0213962  | 4.88948133 | 3.70908131 | 3.17261317 |
| 2.00048663 | 5.45540258 | 5.67772183 | 6.08716192 | 6.33743931 | 5.85339395 | 5.95632536 |
| 0.56484328 | 0.92018839 | 1.06215885 | 2.25450441 | 2.20341433 | 1.71931373 | 2.51762206 |
| 0.11767568 | 0.28482021 | 0.67591927 | 0.65585583 | 1.59485228 | 0.88863406 | 1.67841471 |
| 10.3789954 | 4.46948645 | 7.28061609 | 7.02995468 | 5.98069604 | 6.81930054 | 5.3422712  |
| 3.88329758 | 1.81846753 | 2.91610883 | 1.57815309 | 0.92333553 | 1.91249505 | 1.00295513 |
| 71.4997458 | 105.602572 | 94.9763128 | 95.9189151 | 109.45723  | 113.43607  | 110.734434 |
| 2.11816232 | 2.30047097 | 3.2251005  | 2.97184673 | 4.23894948 | 3.01362857 | 2.0468472  |
| 9.72001152 | 7.60250881 | 6.68194474 | 6.12815291 | 2.85394618 | 4.40453406 | 3.70479344 |
| 18.1926608 | 12.9264559 | 12.842466  | 14.4288283 | 6.44236381 | 7.88179779 | 7.59380313 |
| 44.5284789 | 55.8685806 | 60.8906698 | 59.1909886 | 74.5173742 | 81.5804708 | 81.648735  |
| 98.2591964 | 131.039208 | 129.988931 | 138.693013 | 131.344479 | 182.20862  | 171.136895 |
| 10.7555575 | 44.4538628 | 37.2141836 | 35.1907644 | 98.6500073 | 61.6055224 | 62.1013442 |
| 1.74160013 | 3.72457204 | 2.91610883 | 3.97612597 | 5.12031521 | 4.21135274 | 3.23401858 |
| 12.0735252 | 17.3083054 | 16.569678  | 18.0565308 | 25.0139989 | 28.4942445 | 30.4570864 |
| 131.420204 | 101.483633 | 97.9696696 | 101.555176 | 71.5585035 | 71.5350422 | 65.5605159 |
| 0.4471676  | 1.90610451 | 0.54073541 | 0.63536034 | 1.07022982 | 1.89317692 | 1.65794623 |
| 0.8943352  | 3.35211484 | 1.91188592 | 2.27499991 | 3.16871966 | 3.30340054 | 2.49715359 |
| 35.3733107 | 26.1158228 | 27.1140185 | 25.3324314 | 21.9292188 | 19.0669961 | 22.0445444 |
| 26.4299587 | 16.0594783 | 19.0802353 | 16.4373867 | 17.4594355 | 10.6442906 | 13.8571556 |
| 8.4961844  | 13.2550946 | 14.3294884 | 12.0513509 | 12.8637427 | 14.4499626 | 13.8162186 |
| 36.4323919 | 14.5915587 | 13.7308171 | 14.8182427 | 4.13402498 | 4.67498791 | 4.64634315 |
| 31.1605212 | 47.4992481 | 47.0246689 | 44.3932415 | 68.5996328 | 54.0328148 | 50.90509   |
| 21.675861  | 18.1408568 | 17.458029  | 17.3391885 | 9.38024958 | 6.95452746 | 7.79848785 |
| 1.27089739 | 0.46009419 | 0.63729531 | 0.57387385 | 0.10492449 | 0.69545275 | 0.26609014 |
| 47.0702737 | 35.9092563 | 42.6601617 | 37.5067553 | 13.9759423 | 22.9885769 | 22.8837517 |
| 41.7513328 | 31.0673127 | 26.1484196 | 30.2718456 | 23.9437691 | 22.9885769 | 19.3222376 |
| 91.7634986 | 49.4929896 | 52.489959  | 57.674322  | 23.2092976 | 37.8635384 | 35.9017    |
| 19.1576014 | 26.3568245 | 23.1550628 | 24.2461702 | 47.5517798 | 30.039695  | 31.9512848 |
| 0.11767568 | 0.50391269 | 1.48702238 | 0.22545044 | 1.88864086 | 1.35226923 | 1.12576596 |
| 36.8324892 | 48.8795307 | 48.9751788 | 52.7349078 | 66.2283393 | 60.5430252 | 55.8789287 |
| 0.37656219 | 0.56964043 | 0.90766301 | 0.32792791 | 0.23083388 | 1.19772417 | 1.37138763 |
| 4.2127895  | 2.71674666 | 4.17138747 | 2.19301793 | 1.57386738 | 3.28408241 | 3.31589247 |
| 14.6623903 | 10.7355312 | 9.79117336 | 10.0632879 | 8.98153651 | 8.21020603 | 8.88331686 |

|            |            |            |            |            |            |            |
|------------|------------|------------|------------|------------|------------|------------|
| 1288.384   | 896.066305 | 921.915254 | 916.701991 | 863.927282 | 689.019808 | 704.852303 |
| 73.5943729 | 40.137741  | 41.9263064 | 42.1182416 | 28.9801447 | 19.9942665 | 24.0095177 |
| 2.89482183 | 1.97183226 | 2.04706978 | 1.76261254 | 1.78371636 | 1.66135934 | 2.02637873 |
| 0.28242164 | 0.13145548 | 0.13518385 | 0.51238737 | 0.16787919 | 0.46363516 | 0.16374778 |
| 2.4241191  | 3.41784258 | 3.07060466 | 2.82837827 | 6.5263034  | 3.8249901  | 6.20194703 |
| 101.883607 | 142.169106 | 146.828976 | 145.784454 | 220.425373 | 176.277953 | 168.967237 |
| 42.6692031 | 54.3568425 | 63.3046672 | 54.6819798 | 80.749889  | 71.0134526 | 70.8823187 |
| 0.30595678 | 1.18309935 | 0.81110312 | 1.37319814 | 0.62954695 | 1.35226923 | 1.00295513 |
| 2.89482183 | 2.03756    | 2.10500571 | 1.88558551 | 1.97258045 | 1.12045165 | 1.59654082 |
| 4.49521114 | 1.88419527 | 2.89679685 | 1.35270265 | 0.73447144 | 1.95113132 | 0.53218027 |
| 131.067177 | 82.0501311 | 80.5309525 | 76.3252222 | 43.774498  | 41.5726197 | 41.0597549 |
| 3.20077861 | 1.70892129 | 3.08991664 | 2.58243233 | 2.45523311 | 1.98976758 | 1.73982012 |
| 47.2114845 | 37.8810886 | 34.954682  | 36.8508994 | 21.7403547 | 26.6397038 | 27.8985274 |
| 0.77665952 | 1.16119011 | 1.64151822 | 0.86081078 | 1.23810901 | 1.60340494 | 1.69888318 |
| 1.22382712 | 0.43818495 | 0.0965599  | 0.40990989 | 0          | 0.3670445  | 0.5117118  |
| 9.46112502 | 5.49922107 | 6.70125672 | 5.96418895 | 4.21796458 | 5.35112252 | 4.8305594  |
| 2.11816232 | 4.77621591 | 4.15207549 | 4.18108091 | 6.31645442 | 4.61703351 | 3.8071358  |
| 0          | 0.85446064 | 0.54073541 | 0.63536034 | 2.24538413 | 1.91249505 | 1.59654082 |
| 386.305736 | 601.233564 | 624.626649 | 622.981056 | 617.753439 | 631.277912 | 630.67456  |
| 7.53124379 | 3.83411828 | 4.09413955 | 3.83265751 | 5.66592257 | 4.48180659 | 3.47964025 |
| 0.42363246 | 1.09546236 | 0.56004739 | 0.98378374 | 0.71348655 | 1.12045165 | 1.08482902 |
| 76.1126326 | 97.101784  | 102.392113 | 100.48941  | 163.724177 | 108.954264 | 105.740127 |
| 30.948705  | 20.6823294 | 19.6789066 | 19.224774  | 11.8144978 | 13.9476912 | 13.7343447 |
| 212.428145 | 300.419599 | 316.27228  | 294.438277 | 557.337916 | 332.04005  | 344.668601 |
| 11.9793847 | 15.5993841 | 15.8937587 | 18.6304047 | 27.0915038 | 17.9465445 | 18.8309943 |
| 3.22431375 | 3.00156688 | 2.22087759 | 1.59864859 | 2.01455025 | 2.47272088 | 2.45621664 |
| 2.47118937 | 6.13458924 | 3.72721195 | 4.48851333 | 8.12115568 | 8.53861427 | 9.23128089 |
| 0.6354487  | 2.12519699 | 2.04706978 | 1.61914408 | 2.45523311 | 3.09090109 | 4.23697371 |
| 4.14218409 | 1.77464903 | 1.52564634 | 2.39797288 | 1.11219961 | 1.37158736 | 2.14918956 |
| 0.30595678 | 1.00782538 | 1.02353489 | 0.81981979 | 1.88864086 | 1.3329511  | 1.08482902 |
| 42.8574842 | 26.1815505 | 28.1761774 | 26.5416656 | 29.0221145 | 26.1760686 | 26.1382388 |
| 10.6378819 | 9.81534279 | 9.88773326 | 8.54662128 | 5.39311889 | 5.37044065 | 5.69023523 |
| 1.48271362 | 0.76682366 | 1.52564634 | 2.3159909  | 6.21152992 | 3.72839944 | 3.07027081 |
| 37.9857109 | 27.2770129 | 29.1610883 | 30.3948186 | 16.2003416 | 17.6567725 | 16.2314983 |
| 5.24833552 | 6.4851372  | 7.76341557 | 6.02567544 | 11.4787394 | 10.1613373 | 7.34818146 |
| 10.9203035 | 8.50078795 | 8.24621504 | 9.59189151 | 2.97985557 | 6.007939   | 8.16692034 |
| 1.10615143 | 0.65727742 | 1.17803072 | 0.53288286 | 0.54560736 | 0.23181758 | 0.28655861 |
| 4.00097327 | 0.8325514  | 1.12009478 | 0.81981979 | 1.42697309 | 1.08181538 | 0.32749555 |
| 2.54179478 | 1.77464903 | 1.21665468 | 1.57815309 | 1.07022982 | 0.57954396 | 1.04389207 |
| 0.40009733 | 0.92018839 | 1.23596666 | 0.96328825 | 2.26636903 | 1.87385879 | 1.7602886  |
| 28.0538831 | 14.438194  | 14.715728  | 17.0112606 | 5.66592257 | 6.18180219 | 7.18443368 |
| 14.0269416 | 8.56651569 | 7.93722338 | 7.80878347 | 6.40039401 | 6.29771098 | 4.72821704 |
| 14.4741092 | 10.7793497 | 9.79117336 | 11.1905401 | 3.54644783 | 3.8249901  | 3.82760427 |

|            |            |            |            |            |            |            |
|------------|------------|------------|------------|------------|------------|------------|
| 12.0735252 | 16.4538447 | 15.5654551 | 19.1222965 | 29.4627973 | 25.055617  | 29.658816  |
| 5.31894093 | 1.70892129 | 1.75739009 | 1.5371621  | 0.08393959 | 0.09659066 | 1.08482902 |
| 3.22431375 | 4.55712344 | 5.48460204 | 5.24684664 | 5.87577155 | 5.37044065 | 5.69023523 |
| 9.81415207 | 14.3724662 | 12.4369145 | 12.1538283 | 18.7604992 | 29.595378  | 29.8430322 |
| 0.58837842 | 2.34428946 | 1.89257394 | 1.68063056 | 4.28091927 | 2.26022143 | 2.57902748 |
| 131.020107 | 91.3615612 | 85.3010113 | 88.8069784 | 34.4362183 | 55.3464477 | 57.9871813 |
| 27.3948993 | 18.7104972 | 20.1423941 | 19.5731974 | 9.1913855  | 13.329511  | 11.5442182 |
| 3.78915703 | 5.30203785 | 5.02111454 | 4.36554037 | 8.72971773 | 5.19657746 | 5.48555051 |
| 5.15419497 | 3.68075355 | 3.53409216 | 2.17252244 | 2.6650821  | 1.97044945 | 3.47964025 |
| 1.10615143 | 0.50391269 | 0.32830364 | 0.55337836 | 0.18886409 | 0.34772637 | 0.63452263 |
| 10.143644  | 18.1408568 | 17.2842212 | 17.8720714 | 23.5030862 | 24.0703923 | 23.456869  |
| 30.9016347 | 15.3145639 | 17.9601405 | 16.5808552 | 19.8936837 | 21.4624445 | 20.3251927 |
| 61.1442855 | 39.9405578 | 41.8104346 | 44.4752235 | 41.717978  | 30.6965115 | 35.0010872 |
| 0.82372979 | 0.8325514  | 1.79601405 | 1.41418913 | 4.21796458 | 2.62726593 | 2.84511761 |
| 5.90731935 | 2.93583914 | 4.65418694 | 5.26734213 | 4.51175315 | 3.43862747 | 3.27495553 |
| 28.4304453 | 10.1878    | 10.8340202 | 11.1495491 | 12.6748786 | 9.33065768 | 9.23128089 |
| 83.5026656 | 67.5681187 | 66.3752719 | 67.0202676 | 33.3659884 | 45.1078378 | 45.1125124 |
| 14.6623903 | 43.7527668 | 38.3342784 | 38.7774759 | 120.453317 | 72.3464037 | 78.9468966 |
| 0.28242164 | 0.48200344 | 0.79179114 | 0.18445945 | 0.44068287 | 1.71931373 | 1.59654082 |
| 4.28339491 | 8.54460644 | 10.7760843 | 10.2682428 | 14.7313987 | 14.0056456 | 15.4332279 |
| 0.35302705 | 0.81064215 | 0.86903906 | 0.96328825 | 1.84667106 | 1.29431483 | 1.80122554 |
| 9.22577365 | 25.8090933 | 27.3457623 | 24.2666657 | 54.3928566 | 35.1783181 | 32.2378435 |
| 0.25888651 | 1.29264559 | 1.69945415 | 1.37319814 | 5.47705848 | 3.47726373 | 2.96792845 |
| 18.569223  | 57.3365002 | 52.5865189 | 49.968016  | 109.058517 | 68.4055048 | 55.7561178 |
| 0.32949192 | 1.75273978 | 1.73807811 | 1.70112606 | 3.44152334 | 2.85908351 | 3.97088357 |
| 0.72958924 | 1.44601032 | 1.44839843 | 1.68063056 | 3.75629681 | 1.52613242 | 1.80122554 |
| 0.18828109 | 1.27073634 | 0.79179114 | 0.84031528 | 1.65780697 | 3.57385439 | 2.16965804 |
| 0.18828109 | 1.64319355 | 1.42908645 | 1.9265765  | 0.54560736 | 2.24090329 | 1.92403637 |
| 8.96688714 | 26.9702834 | 28.0216816 | 27.1565305 | 61.7375711 | 39.8146697 | 41.4486559 |
| 8.96688714 | 26.9702834 | 28.0216816 | 27.1565305 | 61.7375711 | 39.8146697 | 41.4486559 |
| 4.00097327 | 6.28795397 | 9.19250201 | 7.27590061 | 7.59653322 | 10.4897456 | 8.33066812 |
| 6.2603464  | 17.1987591 | 19.4471629 | 19.388738  | 28.4765071 | 25.1715258 | 22.7814094 |
| 0.91787034 | 2.34428946 | 2.0277578  | 2.23400892 | 2.07750494 | 3.97953516 | 3.74573038 |
| 0.96494061 | 1.9937415  | 2.35606144 | 2.13153145 | 2.6650821  | 4.50112472 | 3.99135205 |
| 0.96494061 | 1.9937415  | 2.35606144 | 2.13153145 | 2.6650821  | 4.50112472 | 3.99135205 |
| 3.71855162 | 6.98904989 | 7.18405619 | 7.13243215 | 13.0735917 | 10.1420192 | 11.4214074 |
| 3.71855162 | 6.98904989 | 7.18405619 | 7.13243215 | 13.0735917 | 10.1420192 | 11.4214074 |
| 5.74257339 | 7.62441806 | 6.77850464 | 7.50135105 | 15.906553  | 10.0067923 | 7.96223562 |
| 77.0540381 | 40.8169277 | 40.1109804 | 43.7783766 | 16.5780697 | 24.0897104 | 24.8487251 |
| 49.1178306 | 32.5790507 | 33.7187154 | 31.6040528 | 27.5951414 | 24.5919818 | 22.3720399 |
| 4.73056251 | 2.21283398 | 1.08147083 | 1.63963957 | 0.14689429 | 1.58408681 | 0.8801443  |
| 5.08358956 | 9.94679827 | 11.4713155 | 13.0556301 | 11.0380566 | 13.1556478 | 11.4214074 |
| 1.88281095 | 4.84194365 | 6.19914527 | 6.37409885 | 3.44152334 | 5.38975878 | 3.21355011 |



|            |            |            |            |            |            |            |
|------------|------------|------------|------------|------------|------------|------------|
| 1.29443253 | 1.55555656 | 2.60711717 | 1.63963957 | 3.54644783 | 1.19772417 | 2.29246887 |
| 3.27138402 | 6.24413548 | 6.46951297 | 6.31261236 | 6.23251482 | 4.7329423  | 5.75164064 |
| 2.11816232 | 3.30829634 | 3.34097237 | 4.46801784 | 7.34471444 | 3.28408241 | 3.39776636 |
| 72.1822647 | 122.428874 | 116.007058 | 117.439185 | 125.300828 | 95.5088438 | 90.5115833 |
| 12.6854388 | 16.4538447 | 19.7175306 | 19.5936929 | 28.2037034 | 18.0431351 | 20.9392469 |
| 6.23681127 | 10.8669867 | 9.50149368 | 9.44842305 | 13.7031386 | 8.01702471 | 8.53535284 |
| 4.25985977 | 6.92332214 | 6.70125672 | 6.49707181 | 9.84191735 | 6.16248406 | 5.52648745 |
| 28.4304453 | 7.6901458  | 12.1279228 | 9.32545008 | 5.66592257 | 11.5908791 | 11.6056236 |
| 126.548431 | 78.4351053 | 73.1151526 | 71.4882854 | 73.2163105 | 49.1260093 | 51.4372702 |
| 12.7795793 | 10.012526  | 10.7374603 | 8.77207172 | 6.90403157 | 5.81475768 | 6.52944258 |
| 68.7696699 | 50.3474503 | 49.2455465 | 50.7263493 | 20.5861853 | 29.1124247 | 29.8225638 |
| 7.55477893 | 19.9155058 | 24.9703889 | 21.5612604 | 98.2722792 | 76.8861647 | 66.1950386 |
| 52.3186092 | 68.6416718 | 71.2418906 | 69.520718  | 133.254105 | 82.93274   | 87.4003756 |
| 2.09462718 | 0.98591613 | 1.00422291 | 1.04527023 | 0.37772817 | 0.23181758 | 0.06140542 |
| 11.2027251 | 8.58842494 | 8.11103119 | 7.23490962 | 5.68690746 | 3.28408241 | 4.29837913 |
| 22.3819151 | 13.4741871 | 16.2993103 | 16.7448192 | 12.1082864 | 10.6249725 | 10.1114252 |
| 12.3559468 | 6.4413187  | 7.8213515  | 7.54234204 | 9.1913855  | 8.2488423  | 8.02364104 |
| 0.40009733 | 0.32863871 | 0.88835103 | 0.73783781 | 1.3220486  | 1.15908791 | 0.85967583 |
| 3.55380567 | 1.27073634 | 1.79601405 | 1.98806298 | 1.23810901 | 1.12045165 | 1.24857679 |
| 32.7138402 | 53.8310206 | 45.1514069 | 45.0490973 | 93.0890093 | 57.8578049 | 58.580767  |
| 6.77811941 | 6.52895569 | 5.50391402 | 5.86171148 | 3.65137232 | 3.99885329 | 3.82760427 |
| 33.8670619 | 23.3114391 | 25.1055727 | 23.1394135 | 13.1155615 | 17.2704099 | 15.9244712 |
| 39.9626624 | 30.3662167 | 27.0947066 | 28.714188  | 20.8799739 | 18.2169983 | 25.2171575 |
| 0.51777301 | 0.92018839 | 0.79179114 | 0.67635132 | 2.18242943 | 1.17840604 | 1.67841471 |
| 9.08456283 | 18.162766  | 21.7066644 | 19.0813055 | 15.1930664 | 17.3863187 | 21.6761119 |
| 10.6143467 | 19.0829544 | 18.0760124 | 18.1795038 | 33.3869733 | 25.9442511 | 27.2025993 |
| 7.24882215 | 9.99061677 | 7.85997546 | 9.42792755 | 11.562679  | 9.98747416 | 11.9945246 |
| 1.12968657 | 0.52582194 | 0.63729531 | 1.1682432  | 0.27280368 | 0.71477088 | 0.47077486 |
| 89.1275633 | 166.948464 | 145.88269  | 166.13648  | 297.670784 | 165.962071 | 175.701364 |
| 159.332877 | 78.3255591 | 86.9425295 | 86.593465  | 81.7571641 | 82.4304686 | 80.6662483 |
| 2.32997855 | 1.2488271  | 1.27459062 | 1.12725221 | 2.22439923 | 1.60340494 | 1.69888318 |
| 30.8074941 | 19.8278688 | 19.292667  | 17.5646389 | 14.2907158 | 9.33065768 | 11.6465606 |
| 3.10663806 | 1.77464903 | 1.21665468 | 1.74211705 | 1.61583718 | 2.24090329 | 1.80122554 |
| 1.29443253 | 7.25196085 | 5.11767444 | 5.16486466 | 16.1373869 | 10.103383  | 9.35409172 |
| 42.7162734 | 67.4147539 | 69.059637  | 66.1389613 | 109.352306 | 75.4179867 | 77.0637972 |
| 16.5452012 | 11.3051716 | 11.6451233 | 11.2110356 | 15.8855681 | 7.55338955 | 8.18738881 |
| 78.5132165 | 122.341237 | 123.075242 | 110.778149 | 166.200395 | 135.033742 | 150.770765 |
| 9.88475748 | 15.4460193 | 14.1556806 | 15.3511255 | 30.6799214 | 16.5749571 | 16.0063451 |
| 2.47118937 | 0.39436645 | 1.1973427  | 0.49189187 | 0.35674327 | 0.96590659 | 0.40936944 |
| 2.63593533 | 0.74491441 | 0.7338552  | 0.49189187 | 0.86038083 | 0.61818022 | 0.53218027 |
| 70.2288484 | 46.9734262 | 47.9130199 | 45.1105838 | 41.3822196 | 40.8964851 | 35.6151413 |
| 48.1293549 | 39.1956434 | 35.2250497 | 33.3666653 | 22.6636903 | 25.210162  | 27.9804013 |
| 42.998695  | 32.7981432 | 33.17798   | 32.608332  | 17.3964808 | 23.587439  | 24.6031034 |

|            |            |            |            |            |            |            |
|------------|------------|------------|------------|------------|------------|------------|
| 275.102215 | 209.189493 | 204.108306 | 211.513505 | 99.951071  | 127.403079 | 119.024165 |
| 387.600169 | 185.220777 | 199.009944 | 186.549993 | 96.866291  | 80.2282015 | 69.9612374 |
| 358.463669 | 181.802934 | 192.154191 | 196.756749 | 20.4602759 | 35.3328631 | 34.8987448 |
| 62.2739721 | 36.8951724 | 41.9263064 | 38.53153   | 37.6049379 | 26.234023  | 21.8398597 |
| 5.50722202 | 10.3411647 | 8.76763847 | 8.42364831 | 7.15585035 | 12.5181494 | 13.4068492 |
| 33.2551484 | 51.7496421 | 53.7452376 | 51.6691421 | 95.1245444 | 72.4623125 | 69.6746788 |
| 1.83574067 | 2.21283398 | 2.37537342 | 2.21351343 | 2.97985557 | 3.72839944 | 4.4621269  |
| 2.09462718 | 1.6212843  | 1.27459062 | 1.18873869 | 1.46894289 | 1.41022362 | 1.24857679 |
| 0.49423787 | 0.98591613 | 0.48279948 | 0.49189187 | 1.15416941 | 0.94658846 | 1.33045068 |
| 57.3786637 | 17.899855  | 18.0180764 | 18.9378371 | 6.35842421 | 8.59656867 | 7.12302827 |
| 9.03749255 | 7.16432387 | 5.34941819 | 6.5585583  | 5.83380175 | 4.34657966 | 4.27791066 |
| 20.7815258 | 14.3286477 | 11.8189312 | 12.8916662 | 9.63206836 | 10.702245  | 9.47690255 |
| 34.7849323 | 47.2363372 | 49.4000423 | 48.020944  | 70.005621  | 72.38504   | 68.9787508 |
| 3.3184543  | 1.92801376 | 1.77670207 | 2.00855848 | 2.14045964 | 1.89317692 | 1.7602886  |
| 0.32949192 | 1.22691785 | 0.52142343 | 0.69684682 | 1.74174657 | 0.79204341 | 0.85967583 |
| 13.7680551 | 84.964061  | 86.6142259 | 87.5362578 | 371.432702 | 289.733341 | 279.476517 |
| 0.72958924 | 1.79655828 | 1.6608302  | 1.49617111 | 1.40598819 | 1.81590439 | 1.45326151 |
| 80.6784491 | 49.3615342 | 52.3161512 | 53.0833312 | 62.4300727 | 45.3976098 | 43.9662779 |
| 27.4184344 | 19.937415  | 21.4942326 | 19.3272515 | 20.1455025 | 15.0681428 | 13.140759  |
| 3.67148135 | 9.22379311 | 11.8189312 | 10.5346843 | 9.0654761  | 9.48520273 | 9.16987547 |
| 2.21230286 | 5.47731182 | 3.99757966 | 3.97612597 | 2.72803679 | 4.67498791 | 4.89196482 |
| 385.576147 | 279.846816 | 279.173969 | 281.710574 | 184.520212 | 234.869847 | 260.829739 |
| 3.74208676 | 4.75430666 | 5.83221766 | 4.11959443 | 6.23251482 | 7.14770878 | 6.28382092 |
| 8.16669249 | 2.51956344 | 2.81954894 | 3.01283772 | 1.38500329 | 2.49203901 | 1.73982012 |
| 101.271694 | 76.5070916 | 72.670977  | 69.438736  | 29.7565859 | 41.9976186 | 41.4486559 |
| 53.8954634 | 37.6839053 | 42.9691533 | 41.2984218 | 21.8033094 | 32.2612802 | 26.4247974 |
| 18.6868987 | 13.0360021 | 11.6258114 | 9.50990953 | 12.192226  | 10.5670181 | 11.5237498 |
| 114.639652 | 77.5368262 | 80.6275124 | 74.0297268 | 45.5372295 | 59.055529  | 57.1889109 |
| 2.35351369 | 2.54147269 | 3.10922862 | 3.36126113 | 2.91690088 | 2.82044725 | 4.01182052 |
| 50.7652902 | 81.0203965 | 82.5393983 | 74.1322043 | 115.144137 | 87.7429548 | 87.9939613 |
| 10.9438386 | 7.12050537 | 8.6517666  | 6.5380628  | 2.03553514 | 1.79658626 | 2.25153192 |
| 1.48271362 | 1.90610451 | 1.9311979  | 2.35698189 | 3.54644783 | 2.91703791 | 2.47668512 |
| 370.490124 | 299.302227 | 300.243338 | 302.738952 | 72.2300203 | 156.592777 | 168.291777 |
| 10.8967684 | 4.55712344 | 3.18647654 | 3.23828816 | 2.39227842 | 3.09090109 | 2.06731568 |
| 57.0727069 | 38.6479122 | 41.5786908 | 39.1668903 | 16.4521603 | 31.1794648 | 34.9806187 |
| 375.879671 | 241.045539 | 253.604908 | 240.842558 | 205.295261 | 211.456271 | 202.392251 |
| 557.570927 | 368.031536 | 362.543782 | 362.626787 | 125.615602 | 219.280115 | 241.466565 |
| 2.63593533 | 0.13145548 | 0.28967969 | 0.22545044 | 0.25181878 | 0.11590879 | 0.18421625 |
| 1.88281095 | 3.30829634 | 2.43330936 | 1.96756749 | 4.05008539 | 2.22158516 | 2.70183831 |
| 201.17835  | 82.0063126 | 81.3806796 | 86.2860326 | 29.94545   | 59.1328016 | 59.5018482 |
| 1074.87324 | 609.975354 | 623.197563 | 587.154932 | 167.816232 | 207.264237 | 199.055891 |
| 343.259971 | 236.838963 | 244.257911 | 227.131072 | 158.855681 | 154.660964 | 154.536964 |
| 6.2603464  | 16.30048   | 16.7241738 | 14.0599094 | 10.6393435 | 9.54315713 | 9.27221783 |

|            |            |            |            |            |            |            |
|------------|------------|------------|------------|------------|------------|------------|
| 1.76513526 | 0.7887329  | 1.5642703  | 1.29121616 | 0          | 0.81136154 | 0.92108124 |
| 17.4160013 | 22.325523  | 20.4513858 | 23.6108099 | 35.0237954 | 25.9635692 | 29.7816268 |
| 9.15516824 | 4.33803096 | 6.00602547 | 6.39459434 | 3.44152334 | 7.43748076 | 7.08209132 |
| 2.63593533 | 0.7887329  | 1.5642703  | 1.72162155 | 2.14045964 | 1.37158736 | 1.37138763 |
| 25.4885532 | 34.5289737 | 35.3022976 | 31.2761249 | 66.5640977 | 33.3624137 | 35.6356098 |
| 36.2205756 | 43.9499501 | 45.4797106 | 42.6716199 | 94.7048464 | 97.730429  | 86.2336727 |
| 51.8479065 | 37.8372701 | 39.7440528 | 41.3804038 | 21.4045964 | 33.9226395 | 33.1589247 |
| 159.94479  | 114.081451 | 119.985326 | 120.697968 | 65.8506112 | 67.3623257 | 70.0021744 |
| 1.12968657 | 1.38028258 | 1.81532603 | 2.27499991 | 4.72160214 | 4.19203461 | 3.02933386 |
| 4.80116792 | 9.11424687 | 5.04042652 | 7.84977446 | 7.65948791 | 11.5522428 | 11.5032813 |
| 2.11816232 | 0.3724572  | 0.28967969 | 1.02477473 | 0          | 0.69545275 | 0.3684325  |
| 13.1326064 | 8.45696946 | 8.63245462 | 9.03851315 | 5.54001318 | 4.13408021 | 5.50601898 |
| 0.37656219 | 1.42410107 | 0.81110312 | 0.43040539 | 1.46894289 | 1.13976978 | 1.14623443 |
| 5.03651929 | 3.11111312 | 2.45262134 | 2.52094585 | 1.67879187 | 2.02840384 | 1.08482902 |
| 1.50624876 | 3.2425686  | 2.24018957 | 2.97184673 | 2.97985557 | 3.65112692 | 4.35978454 |
| 4.51874628 | 2.8701114  | 2.58780519 | 2.72590079 | 2.68606699 | 1.79658626 | 2.35387428 |
| 10.5908116 | 5.30203785 | 5.36873017 | 4.95990971 | 3.23167435 | 4.13408021 | 4.48259538 |
| 13.8621956 | 7.55869032 | 7.58960775 | 5.49279257 | 5.95971114 | 5.94998461 | 6.18147855 |
| 30.2191157 | 22.4569785 | 25.0283248 | 22.1966207 | 12.8847276 | 14.6817802 | 15.8425974 |
| 6.35448695 | 3.30829634 | 4.90524267 | 4.46801784 | 2.39227842 | 3.32271868 | 2.98839692 |
| 47.9175386 | 37.5524499 | 32.4827487 | 34.0430167 | 19.3480763 | 22.4476692 | 26.6090136 |
| 1.90634609 | 3.33020559 | 7.49304786 | 6.31261236 | 7.30274464 | 13.5999648 | 11.9331192 |
| 12.5442279 | 18.6885879 | 18.423628  | 18.9788281 | 27.1964283 | 26.6397038 | 25.3399684 |
| 7.43710325 | 11.3489901 | 11.2395718 | 10.7191437 | 13.5142746 | 12.0545143 | 12.5267049 |
| 78.7721031 | 51.5305496 | 47.9516439 | 45.6434667 | 44.5299544 | 34.135139  | 34.0800059 |
| 2.61240019 | 3.11111312 | 3.93964372 | 4.16058542 | 3.39955354 | 6.87725493 | 4.35978454 |
| 1.15322171 | 2.89202064 | 3.01266873 | 2.84887376 | 6.58925809 | 6.16248406 | 6.30428939 |
| 17.6984229 | 11.4147178 | 12.842466  | 14.1623868 | 8.89759692 | 10.0454286 | 9.19034394 |
| 71.0055079 | 47.6307036 | 46.4259976 | 44.8646379 | 26.0842287 | 37.5930846 | 31.2348883 |
| 29.4424562 | 7.6901458  | 4.26794736 | 5.51328807 | 1.90962575 | 3.36135494 | 3.58198261 |
| 150.954368 | 95.5681367 | 96.4633352 | 97.6815276 | 51.5179256 | 73.0998109 | 74.3824274 |
| 74.5828487 | 62.5289918 | 59.847823  | 55.4813041 | 16.8089036 | 38.385128  | 33.8548527 |
| 38.5505542 | 27.2112851 | 22.3246477 | 24.9635125 | 9.75797775 | 16.9226835 | 15.6993181 |
| 34.5025106 | 26.9045557 | 26.4767232 | 28.1608097 | 17.8161787 | 19.4147225 | 16.3338407 |
| 100.495034 | 74.0970743 | 76.3402531 | 74.8290511 | 39.1368355 | 40.7033038 | 36.8841866 |
| 48.1293549 | 24.5602662 | 26.2256675 | 28.8986475 | 12.7798031 | 20.6704011 | 24.6235719 |
| 78.7014976 | 55.1236662 | 53.9383574 | 53.2882862 | 59.9538547 | 39.119217  | 39.1152501 |
| 104.142981 | 70.4163208 | 69.1561969 | 72.6155377 | 55.0224036 | 47.7157856 | 45.6446926 |
| 76.3009137 | 50.1721763 | 55.9468032 | 56.4855833 | 32.6105321 | 40.3362593 | 42.7381696 |
| 47.7292575 | 37.8591793 | 34.066331  | 34.2069806 | 27.1754434 | 23.2783489 | 20.9597154 |
| 252.178991 | 153.737188 | 167.74385  | 162.570264 | 78.0848069 | 123.191727 | 122.196778 |
| 1.76513526 | 5.52113032 | 7.14543224 | 4.34504487 | 11.0380566 | 10.5670181 | 12.3015517 |
| 8.19022763 | 4.77621591 | 5.65840985 | 5.36981961 | 3.04281027 | 3.18749175 | 4.38025302 |

|            |            |            |            |            |            |            |
|------------|------------|------------|------------|------------|------------|------------|
| 21.3699043 | 15.4460193 | 16.7821098 | 15.9454949 | 9.75797775 | 13.329511  | 14.3893358 |
| 27.865602  | 37.0266279 | 42.5249778 | 41.0114849 | 41.2143404 | 48.3919203 | 47.8143507 |
| 141.163751 | 200.447703 | 195.282732 | 182.819813 | 253.203784 | 256.332291 | 247.1568   |
| 2.37704882 | 1.66510279 | 1.50633436 | 1.5371621  | 1.00727512 | 0.8499978  | 2.57902748 |
| 4.44814087 | 2.62910968 | 2.78092498 | 3.27927915 | 2.03553514 | 1.89317692 | 1.43279304 |
| 2.44765423 | 4.51330494 | 4.6928109  | 6.68153127 | 7.72244261 | 6.54884669 | 7.36864993 |
| 4.54228141 | 1.27073634 | 0.88835103 | 1.04527023 | 0.10492449 | 0.25113571 | 0.38890097 |
| 2.84775156 | 4.66666967 | 2.70367706 | 2.25450441 | 4.40682866 | 4.52044285 | 4.60540621 |
| 58.7907719 | 36.4788967 | 32.6758685 | 38.408557  | 22.4958111 | 28.3010631 | 31.6647262 |
| 7.36649784 | 4.18466623 | 4.30657132 | 4.44752235 | 1.80470126 | 3.11021923 | 1.3918561  |
| 0.09414055 | 0.81064215 | 0.71454322 | 0.69684682 | 2.91690088 | 1.35226923 | 0.59358569 |
| 0.30595678 | 2.8262929  | 2.08569373 | 0.90180177 | 2.49720291 | 3.70908131 | 1.69888318 |
| 0.40009733 | 1.48982882 | 1.6608302  | 2.27499991 | 5.09933031 | 3.09090109 | 3.58198261 |
| 2.98896238 | 3.6588443  | 4.13276351 | 3.99662146 | 3.02182537 | 5.44771318 | 6.44756869 |
| 4.68349223 | 7.58059956 | 7.49304786 | 6.10765741 | 6.98797116 | 11.3204253 | 11.2985966 |
| 19.1105311 | 23.3552576 | 29.3928321 | 25.8448188 | 49.9440582 | 26.1760686 | 29.658816  |
| 825.071293 | 653.333754 | 700.677223 | 631.753128 | 202.567224 | 321.840076 | 325.65339  |
| 1121.8729  | 729.205478 | 758.362104 | 726.893214 | 343.082104 | 496.321443 | 506.062503 |
| 991.700062 | 741.321291 | 764.850929 | 757.923393 | 411.576812 | 619.146125 | 623.551532 |
| 0.4471676  | 0.61345892 | 1.02353489 | 0.96328825 | 1.09121472 | 1.39090549 | 1.61700929 |
| 36.455927  | 52.9984692 | 54.305285  | 54.1900879 | 96.9502306 | 56.8725801 | 57.6187488 |
| 0.72958924 | 1.94992301 | 1.60289426 | 2.04954947 | 1.3220486  | 1.10113351 | 2.64043289 |
| 1.67099472 | 2.73865591 | 2.83886092 | 2.56193684 | 1.95159555 | 2.62726593 | 3.23401858 |
| 3.10663806 | 5.03912688 | 4.09413955 | 3.99662146 | 7.61751812 | 4.249989   | 5.64929828 |
| 1.20029198 | 3.17684086 | 2.58780519 | 2.86936926 | 3.48349313 | 2.76249285 | 2.68136984 |
| 15.5096552 | 5.10485462 | 4.38381924 | 5.22635114 | 5.33016419 | 1.41022362 | 2.0468472  |
| 0.28242164 | 0.7887329  | 1.21665468 | 0.84031528 | 2.28735392 | 2.62726593 | 2.96792845 |
| 4.75409764 | 2.56338193 | 3.05129268 | 2.47995486 | 1.00727512 | 0.54090769 | 0.79827041 |
| 1.31796766 | 2.47574494 | 2.18225363 | 2.50045035 | 3.8822062  | 2.66590219 | 3.17261317 |
| 197.295052 | 117.959387 | 115.369763 | 109.097518 | 75.9863171 | 108.838355 | 98.2077288 |
| 21.9112124 | 13.7809165 | 12.8231541 | 14.5313057 | 11.6885884 | 9.23406702 | 10.6640739 |
| 17.1806499 | 12.312997  | 10.3319088 | 10.3297293 | 7.57554832 | 4.61703351 | 7.08209132 |
| 1.7886704  | 0.50391269 | 0.65660729 | 0.3689189  | 0.75545634 | 0.21249945 | 0.61405416 |
| 38.7388353 | 29.3583914 | 28.7748487 | 32.567341  | 7.32372954 | 4.19203461 | 5.853983   |
| 0.37656219 | 1.2488271  | 1.12009478 | 0.88130627 | 0.65053185 | 1.12045165 | 1.84216248 |
| 32.9256565 | 47.1487002 | 46.928109  | 48.9022503 | 33.8906109 | 55.674856  | 66.9319036 |
| 85.1030549 | 122.472692 | 121.530284 | 127.60495  | 119.299147 | 177.630222 | 159.019559 |
| 96.6588071 | 66.4945655 | 67.3408708 | 71.5292764 | 46.5235197 | 59.5578005 | 63.5955426 |
| 6.82518969 | 9.15806537 | 8.45864681 | 10.6371617 | 16.305266  | 10.2386099 | 12.9974797 |
| 0.80019465 | 1.38028258 | 1.50633436 | 1.29121616 | 1.63682207 | 0.94658846 | 1.5351354  |
| 10.1201088 | 3.81220903 | 4.30657132 | 4.42702685 | 5.28819439 | 2.27953956 | 3.31589247 |
| 7.08407619 | 3.87793677 | 4.82799475 | 5.28783763 | 2.53917271 | 3.11021923 | 3.37729789 |
| 5.17773011 | 3.17684086 | 3.43753227 | 2.41846837 | 2.81197638 | 2.29885769 | 2.10825262 |

|            |            |            |            |            |            |            |
|------------|------------|------------|------------|------------|------------|------------|
| 6.80165455 | 7.03286838 | 4.92455465 | 5.75923401 | 2.5811425  | 3.65112692 | 5.17852343 |
| 5.76610853 | 9.24570236 | 8.96075826 | 9.98130591 | 14.2907158 | 10.5670181 | 11.4828128 |
| 1.95341636 | 3.17684086 | 3.61134008 | 2.50045035 | 3.06379517 | 4.67498791 | 3.84807274 |
| 1.50624876 | 3.85602752 | 3.18647654 | 2.15202694 | 3.27364415 | 5.08066867 | 3.27495553 |
| 6.66044373 | 4.38184946 | 5.02111454 | 4.07860344 | 1.42697309 | 4.07612582 | 2.9269915  |
| 1.67099472 | 3.52738881 | 2.95473279 | 3.32027014 | 2.81197638 | 3.59317252 | 2.66090136 |
| 1.48271362 | 0.4162757  | 0.67591927 | 1.31171166 | 0          | 0.25113571 | 0.59358569 |
| 1.45917848 | 2.84820215 | 2.24018957 | 2.13153145 | 3.02182537 | 2.99431044 | 2.2720004  |
| 0.80019465 | 0.89827914 | 0.50211145 | 0.84031528 | 3.46250823 | 1.98976758 | 1.20763985 |
| 17.1100445 | 28.4601122 | 30.0687513 | 31.7680168 | 45.2014711 | 43.8714774 | 37.3140245 |
| 0.40009733 | 0.32863871 | 0.84972708 | 0.65585583 | 1.95159555 | 1.13976978 | 0.28655861 |
| 9.60233584 | 9.66197806 | 11.6837473 | 12.5842337 | 17.4594355 | 15.9181406 | 13.6729393 |
| 1.57685417 | 0.81064215 | 0.71454322 | 0.61486484 | 1.02826002 | 1.04317912 | 0.40936944 |
| 0.18828109 | 1.68701204 | 1.1007828  | 1.84459452 | 0.25181878 | 0.98522472 | 3.09073928 |
| 0.77665952 | 3.81220903 | 2.27881352 | 3.83265751 | 4.11304008 | 2.66590219 | 3.39776636 |
| 1.62392444 | 2.36619871 | 2.64574113 | 2.2954954  | 1.69977677 | 2.24090329 | 3.27495553 |
| 4.80116792 | 5.21440086 | 3.84308382 | 2.82837827 | 2.32932372 | 2.26022143 | 3.72526191 |
| 1.15322171 | 0.85446064 | 0.50211145 | 1.04527023 | 0.56659226 | 0.59886209 | 0.98248666 |
| 0.4471676  | 0.89827914 | 1.08147083 | 1.02477473 | 0.33575837 | 2.08635824 | 1.5351354  |
| 4.75409764 | 2.76056516 | 3.88170778 | 2.95135123 | 0.71348655 | 3.4579456  | 1.59654082 |
| 0.54130815 | 1.11737161 | 1.15871874 | 1.31171166 | 1.3010637  | 1.85454066 | 1.47372999 |
| 21.5581854 | 9.33333935 | 9.57874159 | 9.55090052 | 0.65053185 | 3.90226263 | 3.70479344 |
| 12.4736225 | 25.7871841 | 25.6076842 | 24.9635125 | 30.5959819 | 36.3180879 | 40.8960071 |
| 0.82372979 | 1.29264559 | 1.75739009 | 1.41418913 | 1.86765596 | 0.94658846 | 2.12872109 |
| 2.56532992 | 4.8638529  | 3.90101976 | 4.48851333 | 7.55456342 | 5.87271208 | 6.54991105 |
| 34.7143269 | 53.6557466 | 50.7905048 | 46.4018    | 75.1888909 | 55.2112208 | 58.7445147 |
| 141.657989 | 89.9812786 | 98.8580206 | 98.1324285 | 55.148313  | 60.2146169 | 61.48729   |
| 217.041032 | 170.957857 | 171.297254 | 172.674543 | 108.890638 | 119.134919 | 126.413283 |
| 4.2127895  | 4.90767139 | 5.25285829 | 6.37409885 | 7.7644124  | 7.68861647 | 5.66976675 |
| 4.6599571  | 2.91392989 | 4.98249059 | 3.83265751 | 2.30833882 | 3.30340054 | 3.60245108 |
| 43.1163707 | 28.8982972 | 28.2341133 | 29.7389628 | 17.7322391 | 20.4772197 | 17.9303815 |
| 0.51777301 | 0.70109591 | 1.48702238 | 1.27072067 | 3.23167435 | 0.69545275 | 1.51466693 |
| 1.43564335 | 1.88419527 | 1.60289426 | 2.04954947 | 2.89591598 | 2.62726593 | 2.10825262 |
| 10.0495034 | 5.2801286  | 5.54253798 | 6.47657632 | 3.54644783 | 4.81021483 | 4.1755683  |
| 1.5297839  | 0.74491441 | 1.25527864 | 1.5371621  | 0.48265266 | 0.4829533  | 1.06436055 |
| 2.96542724 | 1.27073634 | 1.25527864 | 1.29121616 | 1.2590939  | 1.06249725 | 0.61405416 |
| 31.5135482 | 44.9358662 | 44.5913596 | 42.2822055 | 63.0386348 | 58.031668  | 54.9987844 |
| 1.29443253 | 1.59937505 | 1.79601405 | 2.72590079 | 4.42781356 | 2.1829489  | 3.00886539 |
| 7.24882215 | 9.11424687 | 9.19250201 | 10.3707203 | 17.2286016 | 11.6101972 | 13.7752817 |
| 0.82372979 | 0.8325514  | 0.48279948 | 0.24594594 | 0          | 0.19318132 | 0          |
| 1.05908116 | 0.35054796 | 0.27036771 | 0.63536034 | 0.58757715 | 0.28977198 | 0.49124333 |
| 0.42363246 | 0.72300516 | 1.58358228 | 1.33220715 | 2.97985557 | 3.61249065 | 4.99430718 |
| 0.16474596 | 0.39436645 | 0.23174375 | 0.40990989 | 1.42697309 | 0.54090769 | 1.26904527 |

|            |            |            |            |            |            |            |
|------------|------------|------------|------------|------------|------------|------------|
| 12.0735252 | 21.0328774 | 22.6143274 | 19.306756  | 30.1762839 | 18.9704055 | 21.4100217 |
| 1.50624876 | 3.39593333 | 2.91610883 | 2.47995486 | 4.95243602 | 2.6079478  | 3.17261317 |
| 0.54130815 | 2.03756    | 2.45262134 | 1.27072067 | 1.19613921 | 2.14431263 | 2.76324372 |
| 7.06054106 | 3.39593333 | 2.74230102 | 4.77545026 | 4.36485887 | 2.66590219 | 2.12872109 |
| 0.30595678 | 0.50391269 | 0.75316718 | 0.7583333  | 1.97258045 | 0.57954396 | 1.69888318 |
| 3.88329758 | 1.75273978 | 1.1007828  | 2.23400892 | 1.2590939  | 2.51135714 | 2.61996442 |
| 0.25888651 | 0.13145548 | 0.54073541 | 0.7583333  | 1.02826002 | 1.41022362 | 1.49419846 |
| 2.07109204 | 2.4100172  | 2.78092498 | 2.02905397 | 2.97985557 | 3.05226483 | 3.13167622 |
| 1.67099472 | 0.52582194 | 0.94628697 | 0.92229726 | 0.41969797 | 0.83067967 | 0.38890097 |
| 6.11913558 | 4.31612172 | 5.48460204 | 3.87364849 | 1.69977677 | 3.51589999 | 5.32180273 |
| 20.9227367 | 11.7652658 | 13.9239369 | 12.9941436 | 10.3455549 | 13.0976934 | 10.2956414 |
| 1.67099472 | 0.52582194 | 0.94628697 | 0.92229726 | 0.41969797 | 0.83067967 | 0.38890097 |
| 15.297839  | 26.1815505 | 23.5799264 | 25.2504494 | 40.3329747 | 31.7396906 | 33.8139158 |
| 2.75361101 | 2.43192645 | 3.28303643 | 3.64819805 | 10.8282076 | 3.59317252 | 4.81009093 |
| 6.56630318 | 7.75587354 | 8.70970254 | 11.8668914 | 26.5878663 | 13.0976934 | 11.7284345 |
| 0.75312438 | 0.98591613 | 0.48279948 | 0.88130627 | 1.97258045 | 1.15908791 | 1.55560387 |
| 6.16620586 | 2.91392989 | 3.99757966 | 3.81216201 | 1.2800788  | 4.75226043 | 2.86558609 |
| 13.9563362 | 10.2097092 | 9.42424576 | 8.62860326 | 3.44152334 | 7.03179999 | 8.00317257 |
| 10.3554602 | 6.41940946 | 6.02533745 | 5.04189169 | 3.9031911  | 7.05111812 | 7.30724452 |
| 317.206575 | 198.322507 | 213.030441 | 194.850668 | 128.868261 | 142.857585 | 133.945681 |
| 151.354465 | 53.4366541 | 58.6504803 | 59.86734   | 43.0610115 | 34.1737752 | 36.3929433 |
| 548.533435 | 289.684068 | 308.798545 | 308.805618 | 184.793015 | 192.659729 | 182.292212 |
| 2.75361101 | 1.11737161 | 1.1007828  | 0.94279276 | 1.13318451 | 0.88863406 | 0.96201819 |
| 57.1668474 | 45.7245991 | 43.6836965 | 42.9790523 | 20.8170192 | 33.8260489 | 37.5187092 |
| 13.7915902 | 9.66197806 | 9.81048534 | 8.34166633 | 9.1074459  | 7.26361757 | 5.95632536 |
| 9.24930878 | 5.54303957 | 7.28061609 | 6.84549522 | 4.11304008 | 7.08975438 | 7.6142716  |
| 76.0655623 | 53.1518339 | 53.37831   | 53.6981961 | 26.021274  | 39.8726241 | 40.58898   |
| 5.20126524 | 3.13302236 | 3.97826768 | 2.86936926 | 1.23810901 | 2.6079478  | 4.62587468 |
| 117.769825 | 82.4225883 | 87.6763847 | 81.2031499 | 47.3839006 | 58.5339395 | 55.3262799 |
| 9.03749255 | 3.81220903 | 4.98249059 | 3.93513498 | 1.69977677 | 2.56931153 | 1.7602886  |
| 0.96494061 | 1.27073634 | 2.99335675 | 1.90608101 | 3.75629681 | 3.07158296 | 2.35387428 |
| 53.9189985 | 44.212861  | 35.920281  | 32.3418906 | 24.7411952 | 23.4522121 | 20.9392469 |
| 3.15370834 | 2.49765419 | 2.91610883 | 2.74639629 | 1.00727512 | 1.64204121 | 1.43279304 |
| 1.01201088 | 1.22691785 | 1.17803072 | 1.39369364 | 1.72076167 | 1.79658626 | 1.82169401 |
| 0.23535137 | 0.4162757  | 0.96559895 | 0.3894144  | 1.78371636 | 1.12045165 | 1.20763985 |
| 3.01249752 | 1.79655828 | 0.98491093 | 0.57387385 | 1.84667106 | 0.46363516 | 1.37138763 |
| 37.6326838 | 25.7652748 | 25.0476368 | 27.5869358 | 8.22608017 | 18.2749527 | 18.687715  |
| 651.899756 | 495.871994 | 532.740253 | 475.741423 | 356.638348 | 321.859395 | 329.951769 |
| 2.61240019 | 1.97183226 | 1.31321457 | 1.25022518 | 0.33575837 | 0.83067967 | 0.73686499 |
| 0.4471676  | 1.13928086 | 0.65660729 | 0.7788288  | 2.35030862 | 4.07612582 | 2.37434276 |
| 1.5297839  | 2.4100172  | 2.62642915 | 2.19301793 | 2.41326331 | 2.47272088 | 3.09073928 |
| 14.7800659 | 31.5274069 | 28.543105  | 27.1565305 | 33.6807619 | 29.2283335 | 26.1996442 |
| 3.36552457 | 1.48982882 | 1.85394999 | 1.1477477  | 1.40598819 | 2.14431263 | 1.57607235 |

|            |            |            |            |            |            |            |
|------------|------------|------------|------------|------------|------------|------------|
| 18.3809419 | 7.42723483 | 7.68616765 | 7.21441413 | 6.25349972 | 4.82953296 | 3.84807274 |
| 4.89530847 | 12.4663617 | 10.7953963 | 12.2972968 | 14.7104138 | 16.3624577 | 12.5471734 |
| 13.1796766 | 20.550874  | 21.5714806 | 21.9711703 | 25.8953646 | 24.8624357 | 25.0329413 |
| 1.31796766 | 1.27073634 | 2.62642915 | 1.5371621  | 5.2462246  | 4.46248845 | 4.50306385 |
| 41.2335598 | 62.2003531 | 64.9268735 | 40.8475209 | 73.6360085 | 53.9748604 | 72.2741748 |
| 0.56484328 | 1.18309935 | 1.71876613 | 1.47567562 | 2.68606699 | 2.82044725 | 1.43279304 |
| 1.43564335 | 2.30047097 | 1.71876613 | 1.96756749 | 1.11219961 | 3.26476428 | 2.61996442 |
| 3.38905971 | 7.47105333 | 6.17983329 | 6.00517994 | 7.7644124  | 6.93520933 | 8.14645187 |
| 1.71806499 | 3.17684086 | 3.93964372 | 3.19729717 | 5.35114909 | 4.69430604 | 4.11416288 |
| 490.96649  | 712.203902 | 585.481268 | 652.53556  | 2882.35973 | 908.43515  | 981.545108 |
| 128.525382 | 106.807581 | 95.0728727 | 96.7182394 | 52.3153517 | 66.3191466 | 65.2534889 |
| 57.8022961 | 34.7699755 | 38.1025346 | 33.8585572 | 12.4230598 | 25.4419796 | 24.3370133 |
| 26.0533965 | 17.2644869 | 14.6577921 | 16.6218462 | 6.75713728 | 12.9431483 | 9.57924491 |
| 23.5822071 | 14.26292   | 18.423628  | 15.7815309 | 13.8080631 | 11.6681516 | 11.4828128 |
| 1.55331903 | 2.05946925 | 1.13940676 | 4.34504487 | 5.47705848 | 3.43862747 | 5.17852343 |
| 4.56581655 | 0.87636989 | 1.08147083 | 0.96328825 | 1.00727512 | 0.56022582 | 1.59654082 |
| 55.4252473 | 76.5070916 | 77.1899801 | 68.5779252 | 124.251583 | 100.029287 | 94.6666832 |
| 31.6782942 | 17.987492  | 19.1574832 | 20.3110352 | 7.47062383 | 15.8408681 | 16.3133722 |
| 15.7685417 | 12.6635449 | 11.4520036 | 9.55090052 | 7.7853973  | 7.30225384 | 5.21946037 |
| 3.10663806 | 6.24413548 | 7.53167182 | 7.99324293 | 5.54001318 | 5.52498571 | 7.22537063 |
| 58.131788  | 39.6776468 | 40.3041002 | 40.1096831 | 41.2353253 | 30.0590131 | 26.1996442 |
| 0.14121082 | 0.70109591 | 1.23596666 | 1.74211705 | 0.0629547  | 1.08181538 | 0.85967583 |
| 0.35302705 | 0.4162757  | 0.86903906 | 1.25022518 | 1.15416941 | 2.10567637 | 1.61700929 |
| 11.7675684 | 18.075129  | 16.569678  | 18.1385128 | 18.991333  | 21.4431263 | 19.8953548 |
| 108.991219 | 58.1690516 | 58.7277282 | 56.8135113 | 48.7269341 | 46.4214708 | 42.2059893 |
| 3.5773408  | 2.38810796 | 2.18225363 | 1.63963957 | 1.17515431 | 1.39090549 | 1.04389207 |
| 15.5802606 | 23.4428946 | 23.4061186 | 24.5945936 | 21.068838  | 29.749923  | 29.2494465 |
| 0.56484328 | 0.59154968 | 1.23596666 | 0.92229726 | 1.42697309 | 0.86931593 | 0.8801443  |
| 6.30741668 | 4.33803096 | 3.51478018 | 3.62770256 | 1.17515431 | 3.92158076 | 2.70183831 |
| 1.22382712 | 2.43192645 | 1.91188592 | 1.59864859 | 1.90962575 | 2.24090329 | 2.35387428 |
| 27.3948993 | 43.5774929 | 45.2093429 | 39.4538273 | 35.9471309 | 45.7453362 | 44.4984582 |
| 183.362251 | 120.763771 | 120.931613 | 115.881527 | 91.284308  | 82.3725142 | 89.7747183 |
| 73.3590216 | 48.200344  | 47.4688444 | 44.7826559 | 33.5548525 | 30.4067395 | 32.4015912 |
| 75.9949569 | 49.2081694 | 51.4084881 | 51.0952682 | 31.5822721 | 35.1783181 | 36.1473216 |
| 2.28290827 | 2.80438365 | 2.3946854  | 2.43896387 | 3.35758374 | 2.83976538 | 3.70479344 |
| 92.9167203 | 50.500815  | 57.08621   | 54.0466195 | 48.9997377 | 31.4306005 | 28.6558609 |
| 105.413878 | 341.893804 | 330.640393 | 341.59841  | 609.506374 | 685.407318 | 729.025569 |
| 21.1816232 | 27.1017389 | 30.4549909 | 26.93108   | 45.2644258 | 30.3874214 | 32.2378435 |
| 0.6354487  | 1.16119011 | 1.9311979  | 1.88558551 | 1.59485228 | 1.25567857 | 1.37138763 |
| 58.7672367 | 38.363092  | 33.7573393 | 37.2608093 | 28.6863561 | 27.7408373 | 25.8107432 |
| 66.1101994 | 31.7684086 | 31.0536623 | 29.0626115 | 19.2641367 | 19.2215412 | 15.5560387 |
| 12.1441306 | 5.95931526 | 7.06818432 | 5.28783763 | 6.67319769 | 3.12953736 | 4.64634315 |
| 6.75458428 | 3.41784258 | 3.8623958  | 3.36126113 | 3.10576496 | 2.26022143 | 2.25153192 |

|            |            |            |            |            |            |            |
|------------|------------|------------|------------|------------|------------|------------|
| 41.7748679 | 21.8216103 | 23.2709347 | 24.4716206 | 16.6410244 | 14.3920082 | 18.5239672 |
| 84.6323521 | 55.6494881 | 59.5002074 | 49.1072053 | 54.7076301 | 33.7487763 | 30.6208342 |
| 0.77665952 | 1.07355312 | 1.21665468 | 1.10675671 | 1.11219961 | 1.08181538 | 2.21059498 |
| 2.07109204 | 0.56964043 | 1.04284687 | 0.79932429 | 0.67151675 | 1.62272307 | 1.10529749 |
| 0.82372979 | 1.48982882 | 1.12009478 | 1.68063056 | 1.65780697 | 2.35681208 | 1.41232457 |
| 18.6398284 | 12.1596322 | 13.1707697 | 13.9574319 | 9.1074459  | 11.1465621 | 11.6670291 |
| 50.9771064 | 32.5352322 | 35.862345  | 35.7236472 | 33.4918978 | 31.1215104 | 28.8400771 |
| 1.29443253 | 0.21909247 | 0.32830364 | 0.08198198 | 0.31477348 | 0.61818022 | 0.20468472 |
| 8.61386009 | 12.7292727 | 11.3361317 | 11.9488734 | 28.287643  | 19.4340406 | 17.0707057 |
| 132.338075 | 91.5368352 | 101.426514 | 91.0204919 | 53.7633097 | 81.464562  | 88.1781775 |
| 0          | 2.76056516 | 2.83886092 | 2.47995486 | 0          | 0          | 1.35091915 |
| 11.6263576 | 6.35368172 | 5.40735413 | 4.69346828 | 4.13402498 | 1.42954176 | 1.45326151 |
| 12.4030171 | 22.3693415 | 22.3246477 | 21.9506748 | 28.707341  | 25.5385703 | 34.9601502 |
| 0.28242164 | 0.46009419 | 1.46771041 | 1.84459452 | 1.82568616 | 1.95113132 | 2.76324372 |
| 5.90731935 | 3.15493161 | 3.64996403 | 3.15630618 | 5.56099807 | 1.83522252 | 2.00591026 |
| 40.2686192 | 28.5039307 | 32.0192612 | 31.5835573 | 15.5707946 | 21.6749439 | 20.8983099 |
| 26.5476344 | 41.7152068 | 42.5442898 | 39.5563047 | 47.7196589 | 33.1885505 | 37.7847994 |
| 343.660068 | 216.989185 | 218.128803 | 225.901342 | 77.1195016 | 136.308738 | 125.000959 |
| 0.82372979 | 1.94992301 | 1.60289426 | 1.1477477  | 2.24538413 | 2.06704011 | 1.78075707 |
| 24.076445  | 14.1971922 | 17.0717895 | 13.7934679 | 10.9331321 | 9.77497471 | 7.43005535 |
| 23.2291801 | 17.4397608 | 15.2757754 | 14.5313057 | 8.81365732 | 12.9238302 | 14.4507413 |
| 6.63690859 | 4.90767139 | 3.37959633 | 4.57049531 | 6.42137891 | 4.86816922 | 4.4621269  |
| 7.97841139 | 14.7887419 | 17.6704608 | 17.277702  | 38.2974396 | 34.3476384 | 40.4866377 |
| 0.37656219 | 1.05164387 | 1.46771041 | 2.27499991 | 2.45523311 | 2.89771978 | 2.21059498 |
| 3.55380567 | 3.08920387 | 2.89679685 | 3.05382871 | 0.92333553 | 2.04772197 | 0.8801443  |
| 763.244488 | 491.205324 | 504.004028 | 483.181287 | 288.122655 | 291.259474 | 263.163145 |
| 0.94140547 | 0.48200344 | 0.86903906 | 0.96328825 | 3.56743273 | 3.22612802 | 2.66090136 |
| 42.8104139 | 10.6259849 | 9.30837389 | 10.3502248 | 8.64577814 | 5.23521373 | 7.51192924 |
| 1.20029198 | 0.59154968 | 0.8304151  | 0.43040539 | 0.37772817 | 0.61818022 | 0.40936944 |
| 7.93134112 | 3.63693505 | 5.523226   | 4.77545026 | 5.74986216 | 3.74771758 | 4.19603677 |
| 7.29589242 | 12.1596322 | 10.5636525 | 11.3135131 | 14.8573081 | 12.0351961 | 13.0998221 |
| 10.0495034 | 15.4460193 | 15.1792155 | 16.2119363 | 25.7484703 | 24.9976626 | 22.3720399 |
| 12.379482  | 17.4178516 | 15.642703  | 18.7328821 | 31.7501513 | 17.6181362 | 22.2287606 |
| 130.925966 | 103.455466 | 98.529717  | 93.6849062 | 57.2258179 | 63.8077895 | 71.2098142 |
| 0.98847575 | 1.38028258 | 1.25527864 | 2.13153145 | 4.25993437 | 3.78635384 | 4.11416288 |
| 28.8540778 | 43.1393079 | 42.8532814 | 42.9585568 | 77.7910183 | 43.1180703 | 41.5714667 |
| 17.1806499 | 21.9311565 | 21.9384082 | 21.9711703 | 53.9731587 | 27.7601555 | 30.00678   |
| 5.22480038 | 11.3270809 | 9.4821817  | 9.20247711 | 11.5207092 | 9.07952196 | 7.22537063 |
| 3.88329758 | 7.07668688 | 4.11345153 | 6.1486484  | 8.83464222 | 6.22043845 | 8.39207353 |
| 0.56484328 | 2.23474322 | 2.25950155 | 1.35270265 | 0.83939594 | 1.21704231 | 1.63747776 |
| 0.8943352  | 2.08137849 | 1.12009478 | 1.29121616 | 1.99356535 | 1.35226923 | 1.61700929 |
| 2.02402177 | 1.22691785 | 0.90766301 | 0.65585583 | 0.33575837 | 0.56022582 | 0.3684325  |
| 14.4270389 | 9.81534279 | 11.2975077 | 9.6328825  | 4.74258704 | 6.87725493 | 4.89196482 |



|            |            |            |            |            |            |            |
|------------|------------|------------|------------|------------|------------|------------|
| 10.0965737 | 18.162766  | 18.7326196 | 15.0436931 | 17.3754959 | 23.7806203 | 25.974491  |
| 11.3204008 | 6.63850193 | 6.89437651 | 5.51328807 | 7.55456342 | 5.23521373 | 4.8305594  |
| 42.8104139 | 25.8090933 | 28.0216816 | 27.7099088 | 24.2375576 | 27.1806115 | 22.6585985 |
| 0.75312438 | 0.46009419 | 0.50211145 | 0.55337836 | 0.37772817 | 0.56022582 | 0.77780194 |
| 108.120419 | 67.8967574 | 75.471214  | 68.5779252 | 59.1144588 | 49.4737356 | 54.7531627 |
| 1.01201088 | 0.15336473 | 0.38623958 | 0.53288286 | 0          | 0.09659066 | 0.1432793  |
| 17.2512553 | 24.7355402 | 24.2558456 | 24.3076567 | 43.8164678 | 26.6203857 | 23.1907788 |
| 234.362893 | 173.170691 | 182.923065 | 182.061479 | 78.6094294 | 143.282584 | 131.509933 |
| 12.4030171 | 22.062612  | 20.3934498 | 20.1470713 | 24.4264217 | 22.6988049 | 26.8136984 |
| 6.23681127 | 9.92488902 | 12.5720983 | 10.7806302 | 9.86290224 | 11.8226967 | 12.8132635 |
| 0.09414055 | 1.09546236 | 1.37115051 | 0.7788288  | 3.02182537 | 1.41022362 | 1.49419846 |
| 0.16474596 | 1.81846753 | 0.42486354 | 0.22545044 | 2.32932372 | 1.2749967  | 0.75733347 |
| 0.09414055 | 0.81064215 | 0.7338552  | 0.3689189  | 1.48992779 | 1.13976978 | 1.41232457 |
| 2.25937314 | 4.75430666 | 2.35606144 | 3.42274761 | 4.57470785 | 5.98862087 | 3.62291955 |
| 32.0548564 | 19.8716873 | 14.4839843 | 16.2324318 | 12.2971505 | 11.9386055 | 12.1582724 |
| 0.32949192 | 1.09546236 | 0.77247916 | 0.57387385 | 1.55288248 | 0.79204341 | 2.12872109 |
| 0.21181623 | 1.44601032 | 0.54073541 | 0.61486484 | 1.15416941 | 0.65681648 | 0.53218027 |
| 1.81220554 | 0.7887329  | 0.63729531 | 0.3894144  | 0.83939594 | 1.12045165 | 1.65794623 |
| 4.98944901 | 6.66041118 | 7.10680828 | 6.64054028 | 8.91858182 | 9.56247526 | 7.71661396 |
| 2.02402177 | 1.53364731 | 1.68014217 | 0.79932429 | 0.92333553 | 1.44885989 | 0.63452263 |
| 15.9097525 | 23.7715333 | 23.039191  | 20.6184676 | 31.9180305 | 35.8158164 | 32.0740957 |
| 22.0524232 | 30.9577664 | 34.3946346 | 33.2641879 | 46.4185952 | 31.3340098 | 33.7525104 |
| 17.0865094 | 13.3646408 | 9.21181399 | 12.4817563 | 8.72971773 | 10.6249725 | 10.5412631 |
| 9.36698447 | 7.55869032 | 8.42002285 | 7.50135105 | 1.44795799 | 3.55453626 | 4.09369441 |
| 13.932801  | 8.85133591 | 8.53589473 | 6.82499973 | 7.23978994 | 6.18180219 | 5.46508203 |
| 0.98847575 | 2.93583914 | 2.68436508 | 2.88986475 | 2.24538413 | 4.67498791 | 3.58198261 |
| 1.76513526 | 2.62910968 | 3.43753227 | 3.13581069 | 5.1832699  | 4.07612582 | 3.56151413 |
| 33.2316132 | 22.0407028 | 25.3566285 | 24.7790531 | 17.9001183 | 15.976095  | 18.5649041 |
| 54.3897013 | 39.5242821 | 34.7615622 | 38.0806291 | 21.4675511 | 35.0817274 | 30.5594287 |
| 7.22528701 | 3.72457204 | 4.05551559 | 4.18108091 | 2.95887067 | 5.35112252 | 5.81304606 |
| 10.0495034 | 6.30986322 | 6.95231245 | 7.80878347 | 2.97985557 | 6.45225603 | 7.12302827 |
| 349.590923 | 227.04553  | 228.557272 | 227.950892 | 121.964229 | 154.912099 | 157.238802 |
| 122.217966 | 84.964061  | 79.2563619 | 82.699321  | 46.0198822 | 55.1919027 | 61.9785333 |
| 74.0650757 | 46.86388   | 48.7048111 | 46.0533765 | 31.9390154 | 35.8351346 | 36.7818442 |
| 40.9982084 | 29.7527578 | 31.266094  | 32.9772509 | 22.9364939 | 20.8829005 | 21.6147065 |
| 0.37656219 | 1.16119011 | 1.46771041 | 1.1682432  | 2.18242943 | 0.83067967 | 1.14623443 |
| 232.997855 | 180.335014 | 181.532603 | 168.493462 | 83.5198956 | 134.318971 | 124.837211 |
| 34.4083701 | 27.4741961 | 22.6915753 | 22.4425667 | 15.0042023 | 16.9613198 | 18.1145978 |
| 499.156718 | 209.540041 | 213.184936 | 206.061704 | 131.701222 | 125.355358 | 129.606365 |
| 25.4885532 | 35.7778008 | 35.4374815 | 30.6817555 | 51.1821672 | 39.6408065 | 43.8434671 |
| 62.085691  | 94.2535819 | 89.9551983 | 94.6481944 | 155.099384 | 94.214529  | 101.851117 |
| 42.7633437 | 66.7355673 | 58.2642407 | 62.3063038 | 122.530822 | 65.1021043 | 68.2828227 |
| 173.477494 | 228.228629 | 207.352719 | 217.94909  | 309.69513  | 388.661494 | 421.875677 |

|            |            |            |            |            |            |            |
|------------|------------|------------|------------|------------|------------|------------|
| 7.39003297 | 3.81220903 | 5.0597385  | 5.04189169 | 2.11947474 | 3.14885549 | 4.40072149 |
| 53.7071823 | 110.181605 | 117.996192 | 115.82004  | 117.998084 | 125.026949 | 125.92204  |
| 13.5327037 | 8.65415268 | 9.77186138 | 9.20247711 | 6.14857523 | 5.85339395 | 5.05571259 |
| 45.9876574 | 33.8936056 | 30.9184784 | 29.3905394 | 18.5296653 | 16.2272307 | 17.561949  |
| 45.7758412 | 31.1111312 | 31.3433419 | 33.7765752 | 18.4457257 | 30.6965115 | 31.5009785 |
| 311.769958 | 201.083072 | 204.745602 | 188.210128 | 137.241235 | 148.401889 | 163.993398 |
| 212.734102 | 163.57444  | 168.748073 | 168.431975 | 97.8525812 | 111.388348 | 121.582724 |
| 9.08456283 | 6.09077075 | 6.39226506 | 6.25112588 | 4.02910049 | 4.44317032 | 6.26335244 |
| 24.594218  | 28.6353862 | 30.1846232 | 27.6074313 | 52.9029288 | 37.3226307 | 46.4839    |
| 1.81220554 | 1.00782538 | 0.7338552  | 0.69684682 | 0.56659226 | 0.81136154 | 0.57311722 |
| 7.81366544 | 11.8090843 | 12.8231541 | 13.7114859 | 20.7120947 | 15.1840516 | 16.6408678 |
| 10.0495034 | 16.4538447 | 12.9969619 | 14.8592336 | 13.9969272 | 18.7385879 | 19.4655169 |
| 7.90780598 | 3.17684086 | 4.57693903 | 3.13581069 | 1.97258045 | 3.86362637 | 3.64338802 |
| 13.3679577 | 6.76995741 | 7.74410359 | 7.54234204 | 4.88948133 | 7.72725274 | 7.71661396 |
| 14.097547  | 8.63224343 | 7.68616765 | 7.21441413 | 5.03637561 | 4.23067087 | 6.77506424 |
| 8.73153577 | 3.81220903 | 4.38381924 | 6.23063038 | 4.74258704 | 2.58862967 | 3.41823483 |
| 86.9858658 | 58.7825105 | 54.6335886 | 50.13198   | 44.6978336 | 46.8464697 | 46.6885847 |
| 168.817537 | 106.917127 | 111.410807 | 109.978824 | 55.4001318 | 78.3736609 | 74.6894545 |
| 21.2051583 | 25.1956344 | 25.7042441 | 26.5006746 | 51.6438349 | 34.734001  | 36.6999704 |
| 8.00194653 | 3.92175527 | 3.5920281  | 2.00855848 | 1.93061065 | 1.10113351 | 1.22810832 |
| 85.809109  | 33.6964223 | 45.8466382 | 44.7826559 | 52.5042158 | 49.3578268 | 45.5832872 |
| 0.68251897 | 1.77464903 | 0.98491093 | 1.06576572 | 1.13318451 | 0.75340714 | 1.33045068 |
| 0.77665952 | 1.40219183 | 1.91188592 | 2.21351343 | 3.84023641 | 3.67044505 | 3.88900969 |
| 261.946073 | 140.219183 | 140.687767 | 134.798869 | 43.5226793 | 83.1259213 | 74.4438328 |
| 15.6744011 | 11.0860791 | 13.0548978 | 11.1495491 | 6.82009198 | 11.5329247 | 11.360002  |
| 6.56630318 | 6.98904989 | 8.22690306 | 8.81306271 | 16.5570848 | 12.8079214 | 12.9156059 |
| 0.51777301 | 1.11737161 | 0.34761562 | 1.06576572 | 2.39227842 | 0.92727033 | 0.79827041 |
| 13.250282  | 20.1784168 | 19.7368426 | 19.0403146 | 22.5797507 | 24.9203901 | 31.1939514 |
| 196.471322 | 267.380454 | 261.445572 | 253.508774 | 475.05613  | 288.226527 | 306.167405 |
| 6.42509236 | 12.2472692 | 7.26130411 | 7.00945918 | 8.37297446 | 15.1067791 | 11.2576596 |
| 52.0832579 | 30.0594873 | 29.8370076 | 33.0797284 | 22.8315694 | 26.3499318 | 28.0418067 |
| 36.5029973 | 22.8513449 | 24.0820378 | 22.1351343 | 24.6152858 | 22.6794868 | 21.3690848 |
| 4.2127895  | 2.91392989 | 3.34097237 | 1.90608101 | 2.53917271 | 1.04317912 | 1.7602886  |
| 9.41405474 | 12.8607282 | 14.9088478 | 12.8096842 | 16.7669338 | 19.9942665 | 20.6731568 |
| 9.79061693 | 7.44914408 | 5.00180257 | 6.33310786 | 3.8612213  | 4.77157856 | 4.29837913 |
| 36.5500675 | 21.5806086 | 23.5026785 | 26.0702692 | 14.1857913 | 19.9363121 | 19.0970844 |
| 148.647924 | 205.223919 | 216.448661 | 211.861929 | 213.899069 | 243.698233 | 230.843428 |
| 0.98847575 | 0.04381849 | 0.23174375 | 0.34842341 | 0.81841104 | 0.15454505 | 0          |
| 8.84921146 | 13.5180056 | 13.4604494 | 14.6952697 | 15.7596587 | 15.8988225 | 15.8221289 |
| 2.30644341 | 3.2425686  | 3.88170778 | 4.18108091 | 5.93872624 | 4.90680549 | 3.68432497 |
| 114.639652 | 80.2973913 | 80.3378327 | 81.8999967 | 97.3069738 | 63.440745  | 57.3526586 |
| 4.77763278 | 2.71674666 | 4.24863538 | 4.03761245 | 3.8822062  | 3.92158076 | 4.11416288 |
| 20.3108231 | 12.137723  | 14.7929759 | 14.1828823 | 10.7232831 | 14.952234  | 13.570597  |

|            |            |            |            |            |            |            |
|------------|------------|------------|------------|------------|------------|------------|
| 0.49423787 | 1.00782538 | 0.44417552 | 0.92229726 | 2.70705189 | 1.39090549 | 0.92108124 |
| 1.5297839  | 1.81846753 | 3.51478018 | 2.50045035 | 3.98713069 | 3.99885329 | 3.33636094 |
| 5.22480038 | 7.3176886  | 7.14543224 | 7.56283754 | 7.70145771 | 7.7079346  | 8.31019965 |
| 3.1301732  | 1.18309935 | 0.81110312 | 1.1682432  | 2.07750494 | 2.49203901 | 2.02637873 |
| 28.7599372 | 20.0688705 | 20.9728092 | 17.7286029 | 24.573316  | 18.0817714 | 14.1846511 |
| 84.8677035 | 38.9765509 | 40.9993315 | 33.5101338 | 15.0251872 | 16.9806379 | 15.6583811 |
| 9.62587097 | 5.6964043  | 5.81290568 | 5.92319796 | 4.63766254 | 5.66021263 | 4.3188476  |
| 1.10615143 | 0.30672946 | 0.57935937 | 0.47139638 | 0.16787919 | 0.3670445  | 0.67545958 |
| 31.1369861 | 71.8185126 | 72.4778573 | 70.8529251 | 128.532503 | 120.912187 | 112.556128 |
| 0.94140547 | 2.71674666 | 2.33674946 | 1.94707199 | 3.18970456 | 7.43748076 | 6.38616328 |
| 11.9087792 | 9.50861333 | 8.82557441 | 9.46891854 | 8.70873283 | 4.3079434  | 5.17852343 |
| 66.1572697 | 50.4789058 | 47.1598528 | 46.7092324 | 44.3201054 | 35.603317  | 34.4689069 |
| 5.50722202 | 8.71988042 | 8.30415098 | 7.48085556 | 10.4714643 | 11.6101972 | 8.86284839 |
| 0.54130815 | 0.7887329  | 0.94628697 | 1.43468463 | 4.02910049 | 2.22158516 | 2.08778415 |
| 18.8045743 | 7.79969204 | 7.26130411 | 6.57905379 | 7.38668423 | 5.52498571 | 4.99430718 |
| 45.2109979 | 21.2957884 | 19.1188592 | 20.3520262 | 12.4020749 | 11.6874698 | 11.8512453 |
| 244.318256 | 195.737215 | 209.322541 | 210.591208 | 81.5683    | 123.771271 | 125.512671 |
| 0.21181623 | 0.15336473 | 0.44417552 | 0.49189187 | 1.21712411 | 0.92727033 | 1.41232457 |
| 2.80068129 | 4.68857892 | 5.04042652 | 5.14436916 | 4.36485887 | 5.04203241 | 5.3422712  |
| 36.3617864 | 21.7777918 | 22.7301993 | 25.7218458 | 20.7540645 | 19.8397214 | 22.1264183 |
| 1.74160013 | 4.16275699 | 5.46529006 | 3.853153   | 6.10660543 | 9.13747636 | 6.12007314 |
| 2.07109204 | 2.69483742 | 3.90101976 | 4.11959443 | 2.30833882 | 3.99885329 | 3.07027081 |
| 8.82567632 | 9.46479483 | 8.51658275 | 11.6619365 | 13.1365464 | 13.3874654 | 17.213985  |
| 537.071823 | 398.551118 | 390.314408 | 416.468452 | 340.75278  | 319.000311 | 330.934256 |
| 2.09462718 | 3.1987501  | 2.6650531  | 3.50472959 | 6.5682732  | 2.99431044 | 3.56151413 |
| 59.1908692 | 44.82632   | 43.9347523 | 45.2540523 | 35.7792518 | 31.5271912 | 28.8400771 |
| 70.6289457 | 40.6416537 | 41.0379554 | 41.0934668 | 10.6603284 | 22.0999428 | 19.7930125 |
| 91.9753148 | 52.3192825 | 50.1532095 | 55.1123852 | 35.6113726 | 34.289684  | 35.7174837 |
| 7.6018492  | 2.05946925 | 2.37537342 | 3.73018003 | 0.48265266 | 1.00454286 | 2.16965804 |
| 78.2072598 | 57.9718683 | 60.6589261 | 63.4950425 | 30.9946949 | 47.5998769 | 47.220765  |
| 14.3093632 | 9.44288558 | 12.1279228 | 10.7396392 | 10.8701774 | 8.78974999 | 9.68158727 |
| 11.17919   | 4.42566795 | 4.96317861 | 5.0009007  | 3.42053844 | 5.2158956  | 4.87149634 |
| 1.64745958 | 1.53364731 | 0.75316718 | 0.24594594 | 0.27280368 | 1.06249725 | 0.5117118  |
| 16.4510607 | 8.1064215  | 8.69039056 | 6.78400874 | 8.93956671 | 5.87271208 | 3.39776636 |
| 2.35351369 | 3.06729462 | 2.16294165 | 3.68918904 | 3.75629681 | 5.37044065 | 4.8305594  |
| 12.0499901 | 19.0610451 | 17.1490374 | 15.7200444 | 26.0002891 | 23.3556214 | 23.804833  |
| 17.1806499 | 10.0782538 | 11.9154911 | 11.395495  | 10.0727512 | 9.42724834 | 9.06753311 |
| 3.03603265 | 5.76213204 | 5.19492236 | 4.54999982 | 13.2624558 | 8.6158868  | 7.90083021 |
| 2.49472451 | 4.64476043 | 2.45262134 | 3.29977464 | 3.81925151 | 4.32726153 | 4.70774857 |
| 8.42557899 | 10.2535277 | 11.046452  | 11.8054049 | 13.3044256 | 14.7590527 | 12.0763985 |
| 30.5015374 | 40.9702924 | 39.0681336 | 39.8432417 | 80.7918588 | 46.7885153 | 45.2353232 |
| 0.98847575 | 0.8325514  | 1.50633436 | 1.08626122 | 2.6231123  | 1.56476868 | 2.96792845 |
| 138.998518 | 97.9781539 | 98.0662295 | 101.30923  | 71.2227451 | 77.5816175 | 81.1779601 |

|            |            |            |            |            |            |            |
|------------|------------|------------|------------|------------|------------|------------|
| 3.08310293 | 2.91392989 | 2.24018957 | 2.07004496 | 3.33659884 | 1.46817802 | 0.83920735 |
| 3.3184543  | 1.90610451 | 2.37537342 | 1.84459452 | 1.53189758 | 1.93181318 | 1.30998221 |
| 1.90634609 | 0.65727742 | 0.75316718 | 0.69684682 | 0.18886409 | 0.59886209 | 0.34796402 |
| 9.22577365 | 5.01721763 | 4.55762705 | 2.84887376 | 0.88136573 | 1.73863187 | 2.19012651 |
| 0.58837842 | 1.22691785 | 0.67591927 | 0.79932429 | 1.09121472 | 0.8499978  | 1.96497332 |
| 5.60136257 | 5.93740602 | 5.79359371 | 6.21013489 | 8.05820098 | 11.2045165 | 14.9010476 |
| 0.84726493 | 1.97183226 | 2.761613   | 1.90608101 | 4.80554173 | 2.26022143 | 2.53809053 |
| 410.429252 | 289.004881 | 275.852308 | 301.099312 | 235.576469 | 226.273278 | 238.723789 |
| 25.0178505 | 9.42097634 | 15.0633436 | 12.9531526 | 6.5682732  | 6.68407362 | 7.14349674 |
| 16.9217634 | 10.4068925 | 8.88351035 | 10.0632879 | 6.5472883  | 7.53407142 | 8.71956909 |
| 6.75458428 | 13.2989131 | 11.4906275 | 10.2067564 | 20.1664874 | 9.65906592 | 10.9096956 |
| 1.20029198 | 3.46166107 | 3.14785258 | 3.64819805 | 1.65780697 | 5.77612142 | 4.27791066 |
| 2.37704882 | 1.42410107 | 1.40977447 | 0.90180177 | 0.96530533 | 1.02386099 | 0.5117118  |
| 53.307085  | 33.5868761 | 39.608869  | 36.4819805 | 26.021274  | 22.5828961 | 25.0943467 |
| 8.09608708 | 5.47731182 | 3.61134008 | 5.4108106  | 3.14773476 | 2.45340274 | 2.19012651 |
| 5.38954634 | 13.7809165 | 13.3445775 | 12.0513509 | 5.2672095  | 8.34543295 | 6.7341273  |
| 14.9918822 | 9.83725203 | 8.63245462 | 12.0103599 | 2.91690088 | 7.63066208 | 11.7489029 |
| 12.1912009 | 10.7355312 | 9.92635722 | 9.44842305 | 2.26636903 | 6.56816483 | 7.67567701 |
| 1.55331903 | 1.40219183 | 0.52142343 | 0.55337836 | 0.52462246 | 1.73863187 | 0.30702708 |
| 5.22480038 | 1.70892129 | 3.53409216 | 2.07004496 | 1.3640184  | 3.96021703 | 3.68432497 |
| 8.09608708 | 4.25039398 | 4.28725934 | 2.56193684 | 1.15416941 | 2.6079478  | 2.49715359 |
| 1.10615143 | 0.28482021 | 0.17380781 | 0.34842341 | 0          | 0.73408901 | 0.34796402 |
| 131.514345 | 83.3865952 | 86.1700504 | 93.4594557 | 61.758556  | 58.9782565 | 58.580767  |
| 0.07060541 | 0          | 0.32830364 | 0.30743242 | 1.00727512 | 1.25567857 | 1.49419846 |
| 25.9121857 | 39.3490081 | 34.7229383 | 41.8313046 | 32.3377284 | 44.5089758 | 52.3174145 |
| 109.556062 | 52.4069195 | 53.2238142 | 49.1481962 | 36.8494816 | 30.2135582 | 27.7143111 |
| 11.2027251 | 5.45540258 | 6.75919266 | 5.67725203 | 3.42053844 | 3.43862747 | 4.70774857 |
| 1.74160013 | 1.81846753 | 4.46106715 | 2.84887376 | 5.33016419 | 2.9749923  | 3.66385649 |
| 0.75312438 | 2.10328774 | 0.67591927 | 1.63963957 | 2.30833882 | 1.75795    | 1.41232457 |
| 3.67148135 | 5.49922107 | 5.8901536  | 6.21013489 | 3.21068945 | 3.92158076 | 5.73117217 |
| 10.9438386 | 8.34742322 | 7.16474422 | 7.66531501 | 1.53189758 | 2.37613022 | 2.00591026 |
| 0.21181623 | 1.00782538 | 1.15871874 | 1.1682432  | 3.10576496 | 2.87840164 | 1.73982012 |
| 3.36552457 | 2.08137849 | 1.89257394 | 2.6849098  | 1.2590939  | 1.31363297 | 2.19012651 |
| 7.22528701 | 4.8638529  | 4.92455465 | 4.6319818  | 4.21796458 | 3.78635384 | 3.35682941 |
| 9.81415207 | 3.85602752 | 4.59625101 | 4.71396378 | 3.42053844 | 2.04772197 | 1.14623443 |
| 2.07109204 | 4.40375871 | 3.8623958  | 3.36126113 | 3.84023641 | 5.19657746 | 5.21946037 |
| 3.5773408  | 1.92801376 | 1.89257394 | 2.54144134 | 0.94432043 | 1.2749967  | 0.73686499 |
| 22.5466611 | 11.787175  | 11.992739  | 13.301576  | 6.00168094 | 9.96815603 | 9.98861435 |
| 26.3358181 | 15.3583824 | 15.7778869 | 16.1504498 | 11.562679  | 10.6249725 | 12.6290472 |
| 37.5620784 | 32.5352322 | 24.0820378 | 27.5254494 | 12.5489692 | 20.6704011 | 20.3251927 |
| 105.013781 | 74.9296257 | 68.9051411 | 65.4011235 | 77.2244261 | 57.587351  | 62.224155  |
| 21.0404123 | 29.4898469 | 27.8864977 | 26.0702692 | 53.1757325 | 43.1567065 | 41.1211603 |
| 1.0826163  | 1.77464903 | 1.40977447 | 1.49617111 | 2.30833882 | 1.71931373 | 2.08778415 |

|            |            |            |            |            |            |            |
|------------|------------|------------|------------|------------|------------|------------|
| 34.0788782 | 23.5962593 | 23.4061186 | 24.0002243 | 9.98881163 | 22.0999428 | 25.237626  |
| 5.78964367 | 6.87950365 | 8.94144629 | 7.84977446 | 8.49888385 | 11.3204253 | 8.69910062 |
| 4.70702737 | 7.64632731 | 7.99515931 | 6.59954929 | 5.58198297 | 6.79998241 | 7.26630757 |
| 34.2671593 | 47.4554296 | 44.5720476 | 42.6921154 | 79.6167045 | 55.2691752 | 60.4843349 |
| 1.90634609 | 1.9937415  | 0.77247916 | 1.06576572 | 0.79742614 | 1.06249725 | 1.04389207 |
| 182.938619 | 97.014147  | 110.232776 | 100.325446 | 72.3559297 | 64.0782433 | 64.8441194 |
| 114.686722 | 70.2848653 | 72.2847375 | 69.1722945 | 53.3645966 | 44.103295  | 46.0745306 |
| 284.704551 | 216.682456 | 212.605577 | 204.48355  | 173.733974 | 158.31209  | 164.709794 |
| 159.662368 | 113.774721 | 111.603927 | 116.803824 | 102.700093 | 94.7747548 | 99.0059992 |
| 5.50722202 | 7.25196085 | 9.30837389 | 8.62860326 | 11.4787394 | 12.5181494 | 12.9770113 |
| 1.36503794 | 0.61345892 | 0.86903906 | 0.67635132 | 0.56659226 | 0.94658846 | 0.67545958 |
| 48.6471279 | 37.9906348 | 34.8581221 | 35.3342328 | 21.2996719 | 21.1533544 | 24.6031034 |
| 86.8211199 | 60.951526  | 57.8973131 | 55.0508987 | 40.0391861 | 45.2044285 | 39.4222771 |
| 113.227543 | 214.732533 | 219.133026 | 186.693461 | 357.309865 | 230.928948 | 226.442706 |
| 225.23126  | 176.325622 | 171.606246 | 166.853822 | 69.0822855 | 118.651966 | 121.930688 |
| 29.4895265 | 19.5211393 | 20.9148733 | 18.8558551 | 12.5279843 | 15.531778  | 13.6934078 |
| 43.2105113 | 78.6541978 | 77.2672281 | 76.3457177 | 139.570559 | 86.9702295 | 75.1192924 |
| 3.85976244 | 7.38341634 | 5.58116194 | 6.43558533 | 8.93956671 | 10.992017  | 8.88331686 |
| 0.28242164 | 1.00782538 | 0.61798333 | 0.28693693 | 5.45607358 | 0.88863406 | 2.7837122  |
| 4.14218409 | 0.7887329  | 1.69945415 | 2.07004496 | 2.20341433 | 1.46817802 | 1.55560387 |
| 20.0284015 | 23.9687165 | 30.1073753 | 25.5373864 | 38.2554698 | 28.4362901 | 31.2553568 |
| 1.60038931 | 1.55555656 | 2.761613   | 2.84887376 | 6.21152992 | 2.66590219 | 4.01182052 |
| 19.5341636 | 31.8779548 | 33.9697711 | 26.3572062 | 44.194196  | 28.861289  | 27.3049417 |
| 3.48320025 | 2.01565075 | 1.1007828  | 1.51666661 | 0.41969797 | 1.12045165 | 1.88309943 |
| 11.2027251 | 6.98904989 | 7.74410359 | 7.54234204 | 6.69418259 | 5.48634944 | 5.28086579 |
| 21.4169745 | 13.912372  | 14.3488004 | 15.289639  | 8.05820098 | 13.6772373 | 15.392291  |
| 9.60233584 | 14.087646  | 15.7006389 | 14.5313057 | 17.0817073 | 20.6510829 | 19.1994268 |
| 21.7229313 | 12.9264559 | 9.98429315 | 10.1452699 | 10.6603284 | 10.7601994 | 8.57628978 |
| 0.18828109 | 0.59154968 | 0.86903906 | 0.51238737 | 1.42697309 | 0.98522472 | 1.33045068 |
| 6.37802209 | 9.26761161 | 8.55520671 | 8.79256722 | 15.1091268 | 8.80906812 | 10.0295513 |
| 28.6422616 | 21.1205144 | 19.9106504 | 17.9745488 | 9.1284308  | 15.3772329 | 13.5091915 |
| 8.54325468 | 5.67449505 | 6.27639318 | 8.32117084 | 7.42865403 | 2.16363077 | 4.76915398 |
| 25.8886505 | 14.7449234 | 18.9450514 | 17.9335578 | 17.2915563 | 14.6624621 | 11.2576596 |
| 28.5010507 | 18.4694955 | 18.8291795 | 17.5031525 | 14.3746554 | 13.1556478 | 13.2840384 |
| 0.37656219 | 0.3724572  | 1.06215885 | 0.59436935 | 1.78371636 | 1.44885989 | 1.96497332 |
| 7.50770866 | 3.11111312 | 4.21001143 | 4.32454938 | 1.97258045 | 2.74317472 | 2.74277525 |
| 7.22528701 | 3.15493161 | 3.18647654 | 2.41846837 | 3.65137232 | 2.37613022 | 2.7837122  |
| 346.743171 | 563.922116 | 570.47586  | 554.567095 | 557.170037 | 538.222471 | 490.1585   |
| 6.21327613 | 5.08294537 | 4.48037913 | 5.26734213 | 5.162285   | 2.31817582 | 3.19308164 |
| 12.1441306 | 4.62285118 | 7.95653536 | 6.96846819 | 6.96698627 | 4.81021483 | 4.99430718 |
| 27.3007588 | 15.2707454 | 16.4731181 | 18.0770263 | 6.4633487  | 12.9045121 | 13.3249753 |
| 3.22431375 | 4.88576215 | 4.11345153 | 4.57049531 | 3.79826661 | 5.08066867 | 5.95632536 |
| 0.54130815 | 0.70109591 | 1.58358228 | 1.37319814 | 1.40598819 | 1.56476868 | 2.68136984 |

|            |            |            |            |            |            |            |
|------------|------------|------------|------------|------------|------------|------------|
| 5.48368689 | 8.80751741 | 8.24621504 | 7.09144116 | 10.114721  | 12.2283775 | 13.3454438 |
| 1.95341636 | 4.8200344  | 4.09413955 | 4.32454938 | 1.40598819 | 6.31702911 | 10.8278217 |
| 0.91787034 | 2.54147269 | 1.37115051 | 1.39369364 | 2.07750494 | 2.87840164 | 3.99135205 |
| 1.76513526 | 0.92018839 | 1.13940676 | 0.90180177 | 0.39871307 | 0.30909011 | 0.26609014 |
| 28.1715588 | 22.1940675 | 21.5135446 | 21.5817559 | 8.72971773 | 11.2624709 | 10.6845424 |
| 4.16571922 | 8.19405849 | 8.57451868 | 9.14099063 | 7.8063822  | 10.7601994 | 10.3775153 |
| 10.0730386 | 14.3286477 | 14.3294884 | 12.8711707 | 21.1737625 | 17.0579104 | 16.5180569 |
| 639.967441 | 393.5339   | 391.878678 | 396.09593  | 403.707475 | 361.635428 | 368.596244 |
| 11.17919   | 5.17058236 | 6.3536411  | 4.07860344 | 2.43424821 | 2.9749923  | 3.04980233 |
| 146.97693  | 116.995381 | 115.756002 | 112.725221 | 65.263034  | 65.35324   | 59.9930915 |
| 114.192484 | 164.582266 | 158.165108 | 170.543011 | 182.568616 | 189.916554 | 176.41776  |
| 13.5327037 | 26.9921927 | 33.100732  | 26.5416656 | 59.471202  | 53.2407713 | 53.1156849 |
| 28.6893318 | 20.9671497 | 19.6982186 | 18.3229722 | 9.92585694 | 14.2567813 | 12.2606147 |
| 470.961624 | 312.951688 | 305.8245   | 304.419582 | 226.15425  | 216.63353  | 203.640828 |
| 173.359818 | 118.375663 | 113.226133 | 115.963509 | 67.3405389 | 90.4474933 | 96.0790077 |
| 24.3588666 | 15.7965673 | 16.6469259 | 14.9207201 | 6.4843336  | 12.1317868 | 8.31019965 |
| 14.0269416 | 8.25978623 | 7.51235984 | 7.3373871  | 3.14773476 | 4.07612582 | 4.95337023 |
| 114.098343 | 83.5180507 | 83.0608218 | 85.4252218 | 40.5218388 | 69.7577741 | 67.9348587 |
| 87.8331307 | 63.7559096 | 55.4833157 | 51.9765745 | 33.0302301 | 36.1635428 | 33.6092311 |
| 45.2580682 | 59.6150619 | 59.1912157 | 57.756304  | 103.182745 | 76.9441191 | 70.247796  |
| 59.0967286 | 41.7590253 | 40.8834596 | 41.8518001 | 19.5789102 | 33.2851412 | 38.419322  |
| 18.6162933 | 23.5086223 | 25.1828206 | 27.2385124 | 40.8575972 | 30.0010587 | 26.6908875 |
| 69.2639078 | 52.0782808 | 53.7259256 | 51.4846826 | 31.6452268 | 41.1862571 | 40.5071062 |
| 7.86073571 | 4.40375871 | 4.53831507 | 3.77117102 | 3.31561395 | 2.5499934  | 2.21059498 |
| 18.2868013 | 26.4663707 | 22.5563915 | 26.7466206 | 43.0819964 | 27.837428  | 33.650168  |
| 0.21181623 | 0.39436645 | 1.21665468 | 0.79932429 | 0.31477348 | 1.37158736 | 1.43279304 |
| 56.9785663 | 79.9030249 | 77.2092921 | 75.5258979 | 152.854    | 86.1009136 | 95.6082329 |
| 25.1590613 | 34.9890679 | 36.6927601 | 32.1574312 | 63.3324233 | 41.1283027 | 38.2555742 |
| 21.4169745 | 28.2191105 | 32.9655482 | 29.7389628 | 53.4275513 | 32.6669609 | 35.1443665 |
| 2.04755691 | 4.22848473 | 4.96317861 | 3.29977464 | 6.96698627 | 5.17725933 | 3.62291955 |
| 0.28242164 | 1.31455484 | 1.12009478 | 0.92229726 | 0.48265266 | 1.25567857 | 0.94154971 |
| 23.040899  | 8.4788787  | 10.6409004 | 11.5799545 | 4.49076826 | 4.42385219 | 6.54991105 |
| 28.3363048 | 51.4210034 | 52.1616553 | 49.8245476 | 59.3662775 | 67.4395983 | 70.9641925 |
| 6.82518969 | 10.275437  | 8.36208692 | 9.30495458 | 8.64577814 | 11.9192873 | 10.7868848 |
| 55.8253446 | 68.9045827 | 71.0680828 | 68.6599072 | 220.782116 | 178.402948 | 193.447529 |
| 5.76610853 | 1.40219183 | 1.33252655 | 1.33220715 | 1.17515431 | 0.54090769 | 0.65499111 |
| 11.9558495 | 9.33333935 | 10.2353489 | 7.39887358 | 3.924176   | 7.61134394 | 6.7341273  |
| 7.88427085 | 4.84194365 | 3.90101976 | 3.89414399 | 3.65137232 | 3.65112692 | 5.26039731 |
| 8.56678982 | 13.0798206 | 14.0204968 | 12.0923419 | 14.0179121 | 13.8704187 | 15.9244712 |
| 13.2738172 | 11.1956254 | 9.07663014 | 8.25968436 | 9.63206836 | 9.65906592 | 5.73117217 |
| 56.9550312 | 87.176895  | 81.4579275 | 82.1459427 | 85.8911891 | 107.23495  | 102.772198 |
| 0          | 0.30672946 | 0.63729531 | 0.53288286 | 2.43424821 | 2.08635824 | 2.35387428 |
| 0          | 0          | 0.40555156 | 0.3689189  | 1.65780697 | 2.22158516 | 0.90061277 |

|            |            |            |            |            |            |            |
|------------|------------|------------|------------|------------|------------|------------|
| 0.21181623 | 0.81064215 | 0.48279948 | 1.20923419 | 2.43424821 | 1.25567857 | 2.02637873 |
| 0.25888651 | 0.67918667 | 0.52142343 | 0.63536034 | 2.77000659 | 1.37158736 | 0.71639652 |
| 168.841072 | 116.688651 | 119.714958 | 114.938734 | 66.7949316 | 66.3577829 | 77.0637972 |
| 19.2752771 | 31.2425866 | 27.3071383 | 32.1164402 | 31.4983325 | 37.9601291 | 36.3315379 |
| 2.49472451 | 0.54773118 | 1.35183853 | 0.57387385 | 0.67151675 | 1.00454286 | 0.20468472 |
| 15.7920768 | 10.9984421 | 11.007828  | 11.4569815 | 7.8273671  | 8.44202361 | 10.234236  |
| 24.5000775 | 28.6572955 | 32.251005  | 32.8747735 | 53.0078533 | 43.4078422 | 39.1152501 |
| 1.76513526 | 2.8262929  | 2.6650531  | 1.84459452 | 2.09848984 | 3.18749175 | 3.11120775 |
| 124.477339 | 72.6072455 | 70.7011552 | 72.0211683 | 46.4395801 | 39.3510346 | 40.5685116 |
| 0.18828109 | 0.30672946 | 0.57935937 | 0.3689189  | 1.3640184  | 1.15908791 | 1.24857679 |
| 0.18828109 | 0.30672946 | 0.57935937 | 0.3689189  | 1.3640184  | 1.15908791 | 1.24857679 |
| 0.18828109 | 0.30672946 | 0.57935937 | 0.3689189  | 1.3640184  | 1.15908791 | 1.24857679 |
| 0.18828109 | 0.30672946 | 0.57935937 | 0.3689189  | 1.3640184  | 1.15908791 | 1.24857679 |
| 0.18828109 | 0.30672946 | 0.57935937 | 0.3689189  | 1.3640184  | 1.15908791 | 1.24857679 |
| 2.30644341 | 4.68857892 | 4.63487496 | 5.12387367 | 10.114721  | 4.26930714 | 6.03819925 |
| 1.90634609 | 1.75273978 | 0.92697499 | 0.7583333  | 0.33575837 | 1.3329511  | 0.57311722 |
| 32.9256565 | 21.2519699 | 22.4791436 | 17.7286029 | 21.0478531 | 14.8170071 | 17.6847598 |
| 0.04707027 | 0.28482021 | 0.75316718 | 0.3689189  | 3.35758374 | 2.93635604 | 3.78666733 |
| 1.01201088 | 2.34428946 | 1.60289426 | 0.98378374 | 3.48349313 | 1.64204121 | 1.94450484 |
| 10.4496008 | 7.71205505 | 7.62823171 | 7.89076545 | 4.09205519 | 5.71816702 | 4.9738387  |
| 70.6995511 | 34.9671587 | 30.1073753 | 37.5682417 | 10.1986606 | 9.23406702 | 15.8835343 |
| 101.154018 | 60.7981612 | 70.3728515 | 66.0364839 | 68.9144063 | 58.4373488 | 54.507541  |
| 8.02548167 | 2.01565075 | 2.14362967 | 1.94707199 | 0.94432043 | 1.25567857 | 1.5351354  |
| 0.47070274 | 0.81064215 | 0.86903906 | 1.74211705 | 4.84751153 | 3.43862747 | 3.68432497 |
| 3.90683272 | 2.4100172  | 2.62642915 | 3.19729717 | 3.44152334 | 1.95113132 | 2.14918956 |
| 18.1455905 | 10.9984421 | 10.3319088 | 13.7524769 | 5.2672095  | 10.4704275 | 13.0793536 |
| 225.584287 | 161.142514 | 159.613507 | 170.461029 | 126.832726 | 134.724651 | 127.334365 |
| 151.401535 | 201.170709 | 205.885008 | 194.789181 | 330.449195 | 241.978919 | 245.130421 |
| 20.805061  | 30.738674  | 28.0409935 | 24.6150891 | 38.0666057 | 36.3760423 | 37.0069974 |
| 29.8425535 | 18.8200434 | 20.2003301 | 18.4664407 | 18.2778465 | 14.1022362 | 14.1437142 |
| 1.95341636 | 3.54929806 | 3.32166039 | 3.77117102 | 7.28175974 | 5.19657746 | 4.05275746 |
| 19.9107258 | 11.962449  | 16.1834384 | 14.2238733 | 5.09933031 | 14.6238258 | 9.78392963 |
| 6.40155722 | 15.862295  | 15.5268311 | 16.5808552 | 13.5982142 | 18.757906  | 15.1876063 |
| 0.68251897 | 1.31455484 | 1.23596666 | 1.5576576  | 1.65780697 | 2.06704011 | 2.12872109 |
| 41.3512355 | 24.3849922 | 26.0518597 | 25.8038278 | 30.9527251 | 15.1260972 | 15.8630658 |
| 8.19022763 | 11.6338103 | 12.6879702 | 12.6867112 | 16.8298885 | 11.6874698 | 13.52966   |
| 2.21230286 | 5.49922107 | 4.30657132 | 3.83265751 | 2.6440972  | 4.86816922 | 4.13463135 |
| 68.1342212 | 43.3364911 | 43.0657132 | 42.9585568 | 40.6477482 | 42.055573  | 35.0420241 |
| 2.35351369 | 0.67918667 | 1.31321457 | 1.61914408 | 0.48265266 | 1.19772417 | 0.8801443  |
| 148.577319 | 289.114427 | 273.129319 | 300.935348 | 315.130219 | 370.792223 | 367.102046 |
| 12.8031144 | 6.98904989 | 8.90282233 | 8.03423391 | 2.20341433 | 4.59771538 | 5.64929828 |
| 5.50722202 | 3.57120731 | 4.17138747 | 5.24684664 | 2.07750494 | 3.49658186 | 4.01182052 |
| 15.2036984 | 6.59468344 | 8.51658275 | 6.70202676 | 6.5053185  | 6.8579368  | 6.38616328 |

|            |            |            |            |            |            |            |
|------------|------------|------------|------------|------------|------------|------------|
| 78.7956382 | 58.4100533 | 58.3608006 | 56.9774752 | 25.202863  | 41.4180747 | 41.6328721 |
| 8.00194653 | 17.9217643 | 19.0222993 | 19.2042785 | 14.6894289 | 15.9954132 | 17.0502372 |
| 6.51923291 | 3.70266279 | 3.82377185 | 4.79594576 | 1.2590939  | 3.36135494 | 2.14918956 |
| 20.0519366 | 27.6932886 | 23.1550628 | 30.1078817 | 42.0747213 | 30.9283291 | 34.5098439 |
| 1.55331903 | 8.36933247 | 10.9885161 | 8.54662128 | 21.1737625 | 16.8647291 | 17.2344535 |
| 3.43612998 | 3.41784258 | 5.90946558 | 5.65675653 | 8.75070263 | 6.83861867 | 7.69614549 |
| 148.200757 | 98.5039758 | 96.9847586 | 96.2673385 | 60.3945376 | 81.5418345 | 80.3796897 |
| 1.45917848 | 1.2488271  | 1.25527864 | 0.69684682 | 1.17515431 | 0.59886209 | 1.43279304 |
| 6.04853017 | 4.05321075 | 4.01689164 | 3.93513498 | 2.91690088 | 2.74317472 | 3.60245108 |
| 1.74160013 | 2.10328774 | 1.5642703  | 2.45945936 | 1.76273146 | 3.14885549 | 2.47668512 |
| 7.76659516 | 5.95931526 | 5.19492236 | 5.69774752 | 5.2042548  | 3.67044505 | 3.02933386 |
| 28.6893318 | 17.8560365 | 15.9903186 | 17.236711  | 9.90487204 | 10.9340626 | 13.8571556 |
| 2.35351369 | 3.57120731 | 3.84308382 | 3.34076563 | 5.68690746 | 6.22043845 | 7.51192924 |
| 10.0495034 | 16.2347522 | 12.0892989 | 12.5432427 | 22.9784637 | 16.2272307 | 15.0852639 |
| 5.46015175 | 4.16275699 | 6.29570516 | 12.5022518 | 24.3214972 | 10.1806555 | 15.5765072 |
| 18.5221527 | 28.5039307 | 24.9897009 | 28.6527016 | 46.3766254 | 32.3965071 | 30.2524017 |
| 15.4390498 | 24.5821755 | 23.5606144 | 18.9993236 | 37.5419832 | 26.6397038 | 24.7873196 |
| 2.63593533 | 1.11737161 | 1.39046249 | 1.25022518 | 1.3220486  | 0.65681648 | 1.0234236  |
| 8.80214118 | 3.17684086 | 3.76583591 | 3.17680168 | 2.47621801 | 4.03748955 | 2.53809053 |
| 18.8516446 | 17.0892129 | 13.9432489 | 14.5722967 | 10.8491925 | 12.4988313 | 12.1787409 |
| 23.911699  | 37.2676296 | 35.2829857 | 35.6006743 | 47.9295079 | 38.9839901 | 34.2232852 |
| 28.3363048 | 21.0109682 | 16.8014217 | 17.9745488 | 12.6119239 | 13.8704187 | 15.7607235 |
| 14.4270389 | 5.71831354 | 7.64754369 | 6.80450423 | 8.47789895 | 5.60225823 | 6.32475786 |
| 11.2027251 | 11.3928086 | 8.40071087 | 8.95653118 | 5.05736051 | 5.6408945  | 6.01773078 |
| 1.3415028  | 1.13928086 | 0.75316718 | 0.81981979 | 0.25181878 | 0.4829533  | 0.53218027 |
| 14.4741092 | 9.28952085 | 10.138789  | 8.95653118 | 7.47062383 | 7.01248186 | 5.87445147 |
| 43.681214  | 28.3943845 | 32.5213727 | 25.9268008 | 17.9420881 | 14.8556434 | 13.570597  |
| 0.91787034 | 2.62910968 | 2.2981255  | 1.5371621  | 2.45523311 | 2.80112912 | 2.00591026 |
| 1.74160013 | 2.12519699 | 3.03198071 | 2.78738728 | 4.82652663 | 4.7329423  | 4.35978454 |
| 6.84872482 | 4.75430666 | 3.28303643 | 5.18536015 | 4.44879846 | 2.91703791 | 4.85102787 |
| 395.955142 | 285.455583 | 274.152854 | 271.278368 | 122.845595 | 222.467606 | 234.896185 |
| 9.76708179 | 13.6494611 | 13.2673296 | 13.506531  | 13.4513199 | 16.4590483 | 9.41549714 |
| 31.3252672 | 46.2942395 | 42.6987856 | 44.9466198 | 53.9941436 | 59.345301  | 59.1948211 |
| 222.148157 | 155.402291 | 141.170567 | 149.965535 | 114.703455 | 124.60195  | 122.278652 |
| 1.43564335 | 0.15336473 | 0.32830364 | 0.53288286 | 0.33575837 | 0          | 0.38890097 |
| 25.276737  | 35.3396159 | 35.9975289 | 36.66644   | 52.3363366 | 48.0441939 | 46.5453054 |
| 1.45917848 | 0.28482021 | 0.52142343 | 0.73783781 | 0.62954695 | 0.30909011 | 1.0234236  |
| 14.0504767 | 11.7652658 | 9.98429315 | 10.3092338 | 4.17599478 | 7.57270768 | 11.2576596 |
| 5.22480038 | 2.12519699 | 2.58780519 | 3.4637386  | 2.81197638 | 2.56931153 | 2.68136984 |
| 3.10663806 | 4.88576215 | 3.84308382 | 4.48851333 | 5.09933031 | 4.42385219 | 6.2224155  |
| 21.2051583 | 33.7621501 | 33.4290357 | 33.1412149 | 32.7784113 | 45.9385175 | 50.5775944 |
| 14.6859254 | 10.3849832 | 10.4091567 | 9.65337799 | 14.3326856 | 8.34543295 | 9.35409172 |
| 10.0259683 | 16.6510279 | 13.769441  | 15.9045039 | 20.3133816 | 17.6567725 | 15.0238585 |



|            |            |            |            |            |            |            |
|------------|------------|------------|------------|------------|------------|------------|
| 2.6830056  | 4.09702924 | 4.26794736 | 4.91891872 | 8.10017078 | 5.71816702 | 4.3188476  |
| 46.5525007 | 61.3020739 | 66.8966953 | 59.826349  | 87.5489961 | 83.666829  | 84.3096363 |
| 15.5567255 | 13.1893669 | 10.7567723 | 11.2725221 | 8.18411037 | 9.33065768 | 9.10847006 |
| 51.58902   | 86.2128881 | 76.1278213 | 76.1202672 | 72.9435068 | 87.2406834 | 94.3391876 |
| 9.55526556 | 11.8529028 | 11.3554437 | 12.6867112 | 18.6975445 | 14.353372  | 14.4302728 |
| 24.4765423 | 9.77152429 | 15.1019676 | 10.9240987 | 9.90487204 | 7.84316153 | 6.67272188 |
| 2.35351369 | 8.4788787  | 5.36873017 | 4.2425674  | 32.7364415 | 16.4783665 | 19.1789583 |
| 7321.68693 | 13466.1464 | 6177.63172 | 8062.02581 | 9723.81434 | 9249.94652 | 11874.3952 |
| 9.46112502 | 33.8716963 | 14.2136166 | 20.0855848 | 34.6040974 | 23.9738016 | 49.6155762 |
| 1.85927581 | 0.26291097 | 0.44417552 | 1.22972968 | 1.3430335  | 1.15908791 | 1.00295513 |
| 0.58837842 | 1.73083054 | 1.6608302  | 1.37319814 | 3.08478006 | 2.70453846 | 2.57902748 |
| 28.9246832 | 34.0688795 | 34.7808742 | 33.0592329 | 50.1119374 | 57.4907604 | 59.624659  |
| 5.86024908 | 3.83411828 | 3.84308382 | 3.29977464 | 1.69977677 | 1.85454066 | 3.33636094 |
| 1.0826163  | 2.47574494 | 2.00844582 | 2.21351343 | 2.47621801 | 4.13408021 | 3.99135205 |
| 14.3328983 | 7.40532559 | 6.91368849 | 7.29639611 | 5.37213399 | 5.37044065 | 4.60540621 |
| 4.33046518 | 2.97965763 | 0.94628697 | 1.66013507 | 0.27280368 | 1.25567857 | 1.06436055 |
| 2.00048663 | 3.00156688 | 1.9311979  | 2.80788277 | 2.68606699 | 2.16363077 | 2.74277525 |
| 19.8165852 | 27.9561995 | 25.3566285 | 26.7876115 | 51.6018651 | 32.1260532 | 27.9599328 |
| 3.24784889 | 7.53678107 | 4.30657132 | 5.7797295  | 12.6538937 | 5.83407582 | 8.35113659 |
| 36.3382513 | 21.6901548 | 24.1013498 | 20.3110352 | 18.7395143 | 18.6226791 | 17.3367958 |
| 61.3796369 | 94.0783079 | 79.0053062 | 87.7822037 | 159.904926 | 90.6020383 | 101.278    |
| 12.0264549 | 8.04069376 | 7.31924005 | 7.72680149 | 3.65137232 | 5.96930274 | 5.21946037 |
| 2.58886505 | 4.31612172 | 5.07905048 | 5.34932411 | 2.5811425  | 8.38406922 | 5.81304606 |
| 3.43612998 | 1.13928086 | 2.45262134 | 3.19729717 | 1.07022982 | 1.56476868 | 1.16670291 |
| 15.4155146 | 17.7683996 | 16.608302  | 19.3272515 | 36.5766779 | 22.9113044 | 25.5241846 |
| 5.46015175 | 13.6494611 | 12.842466  | 13.2400896 | 28.2456732 | 17.3670005 | 15.5560387 |
| 3.64794621 | 3.54929806 | 4.88593069 | 5.0009007  | 9.56911367 | 6.4329379  | 5.99726231 |
| 5.62489771 | 10.4288017 | 10.2160369 | 7.87026996 | 14.8573081 | 11.1851983 | 12.2810832 |
| 0.82372979 | 1.18309935 | 1.71876613 | 1.29121616 | 1.59485228 | 2.51135714 | 1.47372999 |
| 29.2777102 | 40.4444705 | 39.3191893 | 39.6177912 | 68.1379651 | 43.6203417 | 45.051107  |
| 0.65898383 | 2.12519699 | 0.8304151  | 0.7583333  | 2.72803679 | 1.02386099 | 1.26904527 |
| 8.09608708 | 9.11424687 | 7.70547963 | 8.71058524 | 16.0954171 | 14.4113264 | 11.4828128 |
| 1.03554602 | 1.68701204 | 1.31321457 | 1.5371621  | 4.63766254 | 1.87385879 | 1.3918561  |
| 94.9642772 | 289.136337 | 255.497482 | 276.197286 | 481.204705 | 303.352624 | 278.412157 |
| 2.49472451 | 4.22848473 | 4.01689164 | 3.83265751 | 6.08562053 | 5.08066867 | 6.16101008 |
| 3.17724348 | 4.00939225 | 5.83221766 | 5.24684664 | 15.7176889 | 11.9579236 | 10.9915695 |
| 0.14121082 | 1.97183226 | 0.79179114 | 1.06576572 | 2.6231123  | 3.32271868 | 3.37729789 |
| 115.510452 | 79.9687526 | 86.7107858 | 89.3808523 | 56.7431652 | 65.9521021 | 68.5079759 |
| 63.450729  | 159.061135 | 149.609901 | 152.076571 | 135.583429 | 189.047238 | 198.441836 |
| 0.91787034 | 1.44601032 | 1.54495832 | 1.18873869 | 2.24538413 | 2.16363077 | 2.29246887 |
| 2.6830056  | 3.74648129 | 4.38381924 | 3.58671157 | 2.39227842 | 4.63635164 | 3.86854121 |
| 0.91787034 | 2.91392989 | 3.03198071 | 3.21779266 | 0.92333553 | 1.71931373 | 3.09073928 |
| 3.20077861 | 1.64319355 | 1.9311979  | 1.90608101 | 2.85394618 | 1.42954176 | 0.90061277 |

|            |            |            |            |            |            |            |
|------------|------------|------------|------------|------------|------------|------------|
| 7.90780598 | 5.12676387 | 4.19069945 | 3.58671157 | 1.65780697 | 3.0329467  | 4.07322594 |
| 0.87080006 | 3.22065935 | 1.89257394 | 3.42274761 | 5.2252397  | 2.93635604 | 2.90652303 |
| 0.94140547 | 2.8701114  | 1.6608302  | 2.60292782 | 1.46894289 | 2.22158516 | 2.4152797  |
| 6.58983832 | 4.29421247 | 4.15207549 | 3.68918904 | 1.2800788  | 2.14431263 | 2.14918956 |
| 0.35302705 | 1.53364731 | 0.52142343 | 0.55337836 | 1.82568616 | 1.04317912 | 0.90061277 |
| 3.10663806 | 1.88419527 | 2.56849321 | 1.20923419 | 1.74174657 | 0.77272527 | 0.67545958 |
| 23.4409963 | 17.0892129 | 18.4815639 | 18.3024767 | 13.6191991 | 11.3783797 | 9.82486658 |
| 991.700062 | 1479.8382  | 1323.83616 | 1531.27989 | 2419.70568 | 1380.58961 | 1444.50101 |
| 7.95487626 | 11.0422606 | 9.94566919 | 9.85833294 | 12.0453317 | 17.4635912 | 14.655426  |
| 17.0865094 | 9.85916128 | 7.62823171 | 11.0265761 | 9.82093245 | 7.03179999 | 4.62587468 |
| 0.70605411 | 0.35054796 | 1.48702238 | 1.35270265 | 2.39227842 | 2.10567637 | 2.25153192 |
| 16.4510607 | 10.7355312 | 10.8340202 | 12.3177923 | 5.45607358 | 9.4658846  | 7.18443368 |
| 5.03651929 | 6.96714064 | 9.07663014 | 8.19819787 | 7.00895606 | 8.84770438 | 8.80144298 |
| 11.1556549 | 7.60250881 | 9.26974993 | 8.0957204  | 7.68047281 | 6.29771098 | 5.69023523 |
| 1.24736225 | 3.6588443  | 3.05129268 | 2.88986475 | 1.76273146 | 4.61703351 | 2.53809053 |
| 32.2431375 | 50.6322705 | 51.9878475 | 48.9432413 | 83.016258  | 54.7475856 | 58.9491995 |
| 19.0163906 | 32.6447785 | 22.6722634 | 24.4716206 | 41.4032045 | 29.1703791 | 28.9014825 |
| 9.39051961 | 3.96557376 | 4.71212288 | 3.93513498 | 1.48992779 | 1.46817802 | 1.65794623 |
| 485.106241 | 219.968843 | 213.127    | 218.604946 | 136.905477 | 177.823404 | 164.423236 |
| 6.18974099 | 9.6838873  | 8.84488639 | 9.85833294 | 14.9412477 | 10.8761082 | 11.3395335 |
| 31.466478  | 19.5430486 | 18.7712436 | 18.3844587 | 18.6765596 | 13.9283731 | 15.1671378 |
| 6.11913558 | 12.9921836 | 11.5099395 | 11.8873869 | 9.35926468 | 11.7067879 | 13.6934078 |
| 0.18828109 | 1.27073634 | 0.67591927 | 0.28693693 | 0.41969797 | 0.67613461 | 1.47372999 |
| 7.06054106 | 35.2957974 | 18.44294   | 29.1855844 | 33.8906109 | 35.5646807 | 44.0072149 |
| 6.02499503 | 3.37402408 | 1.79601405 | 3.70968454 | 1.17515431 | 1.98976758 | 1.3918561  |
| 4.9188436  | 9.48670408 | 9.98429315 | 8.71058524 | 16.6620093 | 8.32611482 | 8.94472228 |
| 13.8151253 | 11.3928086 | 9.21181399 | 9.96081041 | 4.93145112 | 4.15339835 | 6.18147855 |
| 106.214073 | 35.3177066 | 42.5636018 | 37.7936922 | 22.3279319 | 19.1829049 | 14.2255881 |
| 2.84775156 | 4.92958064 | 4.28725934 | 4.32454938 | 7.49160873 | 3.68976318 | 4.95337023 |
| 6.707514   | 10.0782538 | 14.1943046 | 11.7029275 | 21.8452792 | 11.1851983 | 13.2840384 |
| 15.4155146 | 21.5367901 | 22.131528  | 23.1394135 | 43.0400266 | 25.210162  | 27.3049417 |
| 15.6273309 | 22.5665247 | 22.1894639 | 20.6389631 | 39.1578204 | 25.499934  | 22.4743823 |
| 147.8948   | 92.4132051 | 95.3818644 | 102.088059 | 43.0190417 | 56.7180351 | 58.7854517 |
| 246.012786 | 198.081505 | 202.833716 | 193.456974 | 68.9563761 | 123.867861 | 118.2873   |
| 14.8271362 | 11.1518069 | 10.3319088 | 9.12049513 | 5.2462246  | 10.2192917 | 8.67863214 |
| 30.3838617 | 15.6212933 | 16.2027504 | 17.2162155 | 10.5554039 | 10.7795176 | 13.918561  |
| 60.1558098 | 34.9452494 | 38.6046461 | 36.789413  | 27.1754434 | 27.1806115 | 28.1646175 |
| 42.0337544 | 31.3740421 | 31.7295815 | 30.4153141 | 25.5386213 | 22.1772154 | 24.4598241 |
| 16.1451039 | 10.9984421 | 12.3789786 | 13.342567  | 5.77084706 | 6.87725493 | 8.57628978 |
| 2.35351369 | 5.98122451 | 3.76583591 | 4.11959443 | 1.84667106 | 5.08066867 | 4.78962246 |
| 5.8131788  | 11.7652658 | 9.1152541  | 11.7029275 | 10.4714643 | 17.6374544 | 15.2080747 |
| 85.1030549 | 28.701114  | 28.1761774 | 25.3324314 | 14.7313987 | 10.9340626 | 9.49737102 |
| 1.69452985 | 0.72300516 | 2.20156561 | 0.84031528 | 0.79742614 | 0.59886209 | 0.38890097 |

|            |            |            |            |            |            |            |
|------------|------------|------------|------------|------------|------------|------------|
| 6.0014599  | 3.39593333 | 5.1562984  | 3.0948197  | 3.8822062  | 5.23521373 | 5.21946037 |
| 11.1321197 | 5.93740602 | 5.25285829 | 6.12815291 | 3.9451609  | 2.9749923  | 0.79827041 |
| 168.417439 | 83.5180507 | 85.3010113 | 80.5472941 | 40.0811559 | 30.8510565 | 27.3254102 |
| 31.4194077 | 18.425677  | 21.2624889 | 21.3153145 | 13.1995011 | 11.4556522 | 12.0763985 |
| 3.5773408  | 6.74804817 | 7.10680828 | 6.29211687 | 14.5005648 | 19.2794956 | 21.6556434 |
| 1.05908116 | 2.4538357  | 3.82377185 | 3.40225212 | 3.71432702 | 2.83976538 | 3.47964025 |
| 3.7656219  | 6.46322795 | 7.68616765 | 7.99324293 | 9.25434019 | 7.03179999 | 6.91834355 |
| 10.7084873 | 16.2347522 | 16.4151822 | 17.4621615 | 31.3094684 | 27.8760642 | 29.3722574 |
| 12.3559468 | 5.58685806 | 3.99757966 | 4.34504487 | 2.74902169 | 2.53067527 | 1.51466693 |
| 1.92988122 | 4.4475772  | 3.78514789 | 4.95990971 | 8.20509527 | 4.61703351 | 4.44165843 |
| 15.4861201 | 29.2707544 | 29.6052638 | 29.6569808 | 81.7151943 | 45.571473  | 47.2412335 |
| 25.0178505 | 16.125206  | 16.6662379 | 14.4083328 | 9.52714387 | 16.7874566 | 17.0093003 |
| 13.6268442 | 40.838837  | 37.0983117 | 42.3641875 | 44.8447279 | 43.6010236 | 40.3024214 |
| 15.6037957 | 37.3114481 | 43.1622731 | 40.9295029 | 74.3075252 | 64.0782433 | 59.8498122 |
| 8.28436817 | 12.3568155 | 9.63667753 | 12.9941436 | 11.3738149 | 12.1704231 | 17.8075707 |
| 7.08407619 | 2.93583914 | 4.26794736 | 6.51756731 | 2.22439923 | 4.88748736 | 5.36273967 |
| 373.149595 | 260.785771 | 252.697245 | 245.351567 | 156.484387 | 181.146122 | 185.055456 |
| 0.4471676  | 0.43818495 | 0.23174375 | 0.43040539 | 1.84667106 | 1.15908791 | 0.98248666 |
| 2.65947046 | 1.9937415  | 1.85394999 | 1.31171166 | 1.15416941 | 1.21704231 | 1.30998221 |
| 2.54179478 | 6.81377591 | 7.04887234 | 5.14436916 | 3.08478006 | 4.98407801 | 3.72526191 |
| 68.8873456 | 50.5446335 | 48.9944908 | 51.4231962 | 32.9462905 | 37.805584  | 29.4131943 |
| 8.91981687 | 5.41158408 | 6.43088901 | 4.46801784 | 3.79826661 | 6.39430164 | 4.74868551 |
| 6.16620586 | 3.39593333 | 4.46106715 | 4.48851333 | 2.47621801 | 4.05680769 | 2.7837122  |
| 18.404477  | 28.1314735 | 33.8345872 | 27.1770259 | 38.3603943 | 26.5624313 | 28.8400771 |
| 44.6696898 | 28.1314735 | 28.9293446 | 26.3367107 | 24.5523311 | 18.4488159 | 19.4041115 |
| 9.72001152 | 4.4475772  | 5.61978589 | 4.81644125 | 4.15500988 | 4.63635164 | 4.23697371 |
| 1.83574067 | 1.75273978 | 1.60289426 | 0.71734231 | 1.46894289 | 0.59886209 | 0.79827041 |
| 3.41259484 | 0.92018839 | 2.20156561 | 1.74211705 | 1.67879187 | 2.14431263 | 1.35091915 |
| 10.3789954 | 7.18623311 | 6.9909364  | 7.00945918 | 8.56183854 | 4.05680769 | 5.07618106 |
| 5.24833552 | 7.88732903 | 7.87928744 | 8.58761227 | 9.65305326 | 13.0204209 | 10.3570469 |
| 15.2036984 | 20.6823294 | 20.5672577 | 18.0155398 | 19.7677743 | 30.3874214 | 29.8635007 |
| 17.1100445 | 11.8090843 | 11.5485635 | 12.8506752 | 9.1704006  | 11.3397434 | 9.12893853 |
| 1.50624876 | 4.35994021 | 2.83886092 | 2.09054046 | 2.87493108 | 3.11021923 | 4.89196482 |
| 20.6167799 | 25.1299066 | 27.3843862 | 26.6441431 | 50.1748921 | 34.5601379 | 37.3549615 |
| 4.471676   | 10.6478942 | 9.3856218  | 11.1290536 | 17.1026922 | 16.4783665 | 15.4946333 |
| 1.48271362 | 2.91392989 | 2.52986925 | 3.23828816 | 6.71516749 | 3.01362857 | 5.26039731 |
| 82.0905573 | 50.0626301 | 56.6613464 | 52.0585565 | 41.1933555 | 44.4317032 | 43.4340977 |
| 4.30693004 | 2.65101892 | 3.18647654 | 2.60292782 | 1.57386738 | 1.85454066 | 1.65794623 |
| 1.92988122 | 2.36619871 | 2.68436508 | 2.62342332 | 4.15500988 | 3.22612802 | 4.91243329 |
| 28.3127696 | 19.1486821 | 20.0265222 | 18.9378371 | 17.8581485 | 14.8749615 | 15.8425974 |
| 3.36552457 | 2.76056516 | 1.77670207 | 1.72162155 | 0.86038083 | 2.10567637 | 1.22810832 |
| 3.67148135 | 5.49922107 | 6.00602547 | 5.32882862 | 7.38668423 | 4.75226043 | 4.44165843 |
| 17.0629742 | 25.5680916 | 24.6807092 | 25.7628368 | 35.527433  | 35.0817274 | 37.4368354 |

|            |            |            |            |            |            |            |
|------------|------------|------------|------------|------------|------------|------------|
| 4.73056251 | 2.84820215 | 2.3946854  | 3.54572058 | 1.97258045 | 2.26022143 | 2.61996442 |
| 47.9410738 | 34.9890679 | 28.1568654 | 30.784233  | 27.6580961 | 27.3931109 | 23.804833  |
| 59.2144043 | 93.4867582 | 86.3052342 | 86.79842   | 134.953882 | 95.6054345 | 98.7194406 |
| 5.22480038 | 10.8231682 | 7.58960775 | 8.36216183 | 10.2406304 | 10.9533808 | 10.2547045 |
| 31.1605212 | 18.1408568 | 20.0458342 | 18.5894137 | 16.2842812 | 13.4261016 | 11.9126507 |
| 29.23064   | 17.7026718 | 15.5268311 | 18.9583326 | 21.7823245 | 14.1408725 | 15.1876063 |
| 2.80068129 | 4.62285118 | 4.01689164 | 3.66869355 | 4.97342092 | 4.32726153 | 2.80418067 |
| 6.21327613 | 2.47574494 | 3.2251005  | 1.68063056 | 1.3640184  | 1.37158736 | 0.90061277 |
| 13.9092659 | 6.39750021 | 7.66685567 | 6.49707181 | 2.70705189 | 3.86362637 | 4.23697371 |
| 58.0376475 | 31.6588623 | 35.6499133 | 37.3222958 | 40.9205519 | 44.7214752 | 39.7293042 |
| 64.2509236 | 43.9499501 | 50.7132569 | 42.1387371 | 41.508129  | 34.0771846 | 33.0156454 |
| 19.9107258 | 36.4788967 | 35.3409216 | 32.5058546 | 29.9874198 | 49.2612362 | 55.5309646 |
| 4.84823819 | 7.05477763 | 6.75919266 | 8.28017985 | 8.68774793 | 8.92497691 | 9.98861435 |
| 1.92988122 | 0.61345892 | 1.08147083 | 0.7788288  | 0.75545634 | 0.79204341 | 1.55560387 |
| 194.612047 | 276.538519 | 294.140752 | 284.64143  | 509.618257 | 395.32625  | 399.155673 |
| 2.65947046 | 4.18466623 | 3.18647654 | 3.52522508 | 7.05092586 | 4.77157856 | 3.54104566 |
| 84.608817  | 57.8404129 | 54.7494605 | 55.8297275 | 41.7389629 | 41.8623917 | 42.6358273 |
| 2.65947046 | 3.85602752 | 4.38381924 | 4.38603586 | 4.49076826 | 5.83407582 | 2.80418067 |
| 80.8431951 | 66.4726563 | 54.0928532 | 56.5675653 | 26.9446095 | 59.4418917 | 59.5837221 |
| 0.51777301 | 1.55555656 | 1.62220624 | 0.86081078 | 2.95887067 | 2.37613022 | 2.16965804 |
| 8.47264927 | 6.00313376 | 5.9867135  | 5.34932411 | 6.08562053 | 5.31248626 | 5.50601898 |
| 0          | 0.52582194 | 0.3669276  | 0.40990989 | 2.70705189 | 1.71931373 | 1.47372999 |
| 0.30595678 | 1.94992301 | 1.69945415 | 1.78310804 | 0.73447144 | 1.13976978 | 1.78075707 |
| 92.3754122 | 55.1017569 | 65.2551771 | 62.8391867 | 39.1997902 | 59.7509818 | 52.9928741 |
| 604.005752 | 858.645311 | 913.051056 | 867.000416 | 906.274807 | 1041.36321 | 978.966081 |
| 0.28242164 | 1.11737161 | 1.12009478 | 0.92229726 | 0.16787919 | 1.19772417 | 1.71935165 |
| 18.8045743 | 10.0782538 | 11.2009478 | 12.0923419 | 6.10660543 | 10.1227011 | 10.7254793 |
| 47.1408791 | 33.2144189 | 35.9782169 | 34.3914401 | 24.1746029 | 27.7408373 | 26.4247974 |
| 159.615298 | 107.793497 | 100.016739 | 98.8292753 | 84.5271707 | 81.3100169 | 72.0899585 |
| 26.1710722 | 16.5414817 | 17.6125249 | 14.8182427 | 8.58282344 | 6.95452746 | 7.12302827 |
| 125.771771 | 101.549361 | 92.02158   | 100.03851  | 53.1547476 | 72.9452658 | 69.4904626 |
| 165.687363 | 113.884267 | 119.850142 | 117.439185 | 86.9194491 | 104.607684 | 98.3919451 |
| 16.4275255 | 12.9702744 | 11.6451233 | 8.91554019 | 11.2479055 | 6.47157417 | 6.89787508 |
| 167.123007 | 124.028249 | 127.362502 | 125.698869 | 87.9686941 | 94.948618  | 89.8156553 |
| 102.683802 | 75.7402679 | 74.4476791 | 77.2885104 | 44.5719242 | 64.0782433 | 67.2593991 |
| 7.97841139 | 13.6275518 | 12.0699869 | 11.3135131 | 19.1382273 | 12.6533764 | 12.8746689 |
| 4.98944901 | 9.07042838 | 7.35786401 | 7.50135105 | 9.96782674 | 7.47611702 | 8.04410951 |
| 2.00048663 | 3.74648129 | 1.5642703  | 3.13581069 | 3.02182537 | 3.11021923 | 3.66385649 |
| 52.45982   | 39.3928266 | 92.1181399 | 72.6155377 | 124.209614 | 119.888326 | 113.907047 |
| 34.3848349 | 19.6745041 | 24.2751576 | 22.6680171 | 20.8170192 | 18.2749527 | 16.2929037 |
| 0.40009733 | 1.64319355 | 1.48702238 | 1.06576572 | 0.71348655 | 1.71931373 | 0.79827041 |
| 0.40009733 | 0.43818495 | 0.69523124 | 0.61486484 | 2.18242943 | 1.60340494 | 1.3918561  |
| 10.3083899 | 6.98904989 | 5.02111454 | 5.61576554 | 2.93788577 | 3.12953736 | 3.19308164 |

|            |            |            |            |            |            |            |
|------------|------------|------------|------------|------------|------------|------------|
| 44.8109006 | 50.588452  | 54.0156053 | 52.4274754 | 90.86461   | 91.6065812 | 87.6869342 |
| 5.50722202 | 3.11111312 | 3.32166039 | 2.64391881 | 3.25265925 | 0.81136154 | 1.78075707 |
| 13.7680551 | 6.83568516 | 4.09413955 | 4.81644125 | 1.82568616 | 2.24090329 | 1.04389207 |
| 10.8732332 | 12.1596322 | 13.1900817 | 10.0427924 | 30.7428761 | 18.1010895 | 21.5533011 |
| 8.61386009 | 10.2973462 | 11.8961791 | 8.62860326 | 20.9429286 | 14.353372  | 17.7461653 |
| 0.61191356 | 1.6212843  | 0.84972708 | 1.47567562 | 3.37856864 | 1.39090549 | 1.86263096 |
| 0.32949192 | 0.92018839 | 0.48279948 | 0.34842341 | 1.02826002 | 1.17840604 | 0.90061277 |
| 0.80019465 | 2.25665247 | 1.06215885 | 0.18445945 | 4.19697968 | 2.37613022 | 3.9504151  |
| 11.7675684 | 8.25978623 | 10.5250286 | 7.23490962 | 5.35114909 | 6.35566538 | 5.42414509 |
| 48.8824792 | 30.4976722 | 32.9076122 | 30.0668907 | 10.534419  | 12.8079214 | 12.9156059 |
| 11.9558495 | 6.28795397 | 6.83644057 | 7.29639611 | 4.72160214 | 3.57385439 | 3.56151413 |
| 9.08456283 | 15.9280228 | 15.4882072 | 16.2939183 | 18.6345898 | 20.7669917 | 17.7256968 |
| 21.8876773 | 11.5023548 | 11.7996192 | 11.5799545 | 13.1575313 | 13.9863275 | 11.4009389 |
| 0.77665952 | 2.25665247 | 1.33252655 | 1.41418913 | 1.3220486  | 2.85908351 | 1.14623443 |
| 72.6294323 | 46.8200615 | 44.3596158 | 43.5324307 | 36.6396326 | 34.9465005 | 31.7875371 |
| 20.0048663 | 4.8638529  | 5.58116194 | 5.45180158 | 1.78371636 | 1.31363297 | 1.55560387 |
| 6.04853017 | 3.02347613 | 3.84308382 | 3.81216201 | 1.57386738 | 1.98976758 | 2.47668512 |
| 84.7264927 | 63.0109952 | 67.224999  | 62.5932408 | 46.8592781 | 43.9101137 | 43.4136292 |
| 1.48271362 | 2.60720043 | 2.47193331 | 2.74639629 | 0.90235063 | 1.83522252 | 3.13167622 |
| 7.95487626 | 5.17058236 | 5.17561038 | 4.26306289 | 5.162285   | 4.63635164 | 3.4387033  |
| 14.8271362 | 9.26761161 | 8.26552702 | 9.65337799 | 4.91046622 | 4.61703351 | 3.62291955 |
| 41.4924463 | 29.9499411 | 31.2081581 | 31.3581069 | 16.9977677 | 16.4976846 | 19.3222376 |
| 2.6830056  | 4.27230322 | 4.01689164 | 4.32454938 | 2.85394618 | 4.86816922 | 5.75164064 |
| 29.4424562 | 18.6447694 | 16.1061905 | 16.3349093 | 11.4157847 | 13.9283731 | 14.7168314 |
| 128.996085 | 96.9046008 | 92.987179  | 95.4270232 | 48.6220096 | 82.6043317 | 76.3269322 |
| 6.73104914 | 4.25039398 | 5.00180257 | 4.14008993 | 4.21796458 | 4.34657966 | 3.56151413 |
| 19.6518393 | 28.8325694 | 27.9251217 | 28.0378367 | 20.6911098 | 36.9942225 | 38.1532319 |
| 10.4731359 | 6.26604473 | 5.38804215 | 6.37409885 | 6.4633487  | 3.67044505 | 3.31589247 |
| 10.4731359 | 6.26604473 | 5.38804215 | 6.37409885 | 6.4633487  | 3.67044505 | 3.31589247 |
| 26.1004668 | 17.0453944 | 16.4344941 | 15.0231976 | 10.744268  | 14.5851895 | 13.0588852 |
| 84.3263954 | 61.2144369 | 61.2769094 | 60.5846823 | 51.8746688 | 54.4771318 | 40.281953  |
| 8.11962221 | 6.22222623 | 5.02111454 | 4.57049531 | 1.84667106 | 2.95567417 | 2.9269915  |
| 7.62538434 | 6.02504301 | 4.73143486 | 4.77545026 | 2.68606699 | 4.88748736 | 4.91243329 |
| 26.0769316 | 20.3756    | 21.5135446 | 22.2376117 | 16.1373869 | 15.0488247 | 14.614489  |
| 13.7209848 | 22.2597953 | 24.6613972 | 19.0813055 | 36.8284967 | 26.8908395 | 27.7757166 |
| 14.1681524 | 10.8669867 | 11.4906275 | 12.3997743 | 5.45607358 | 8.1908879  | 8.7809745  |
| 7.3429627  | 15.5336563 | 11.2781957 | 11.4569815 | 39.3256996 | 25.345389  | 26.9569777 |
| 19.8871906 | 11.0641699 | 8.76763847 | 7.76779248 | 17.0607224 | 13.5999648 | 14.0004349 |
| 0.68251897 | 1.66510279 | 1.98913384 | 2.56193684 | 3.84023641 | 1.02386099 | 2.2720004  |
| 6.04853017 | 2.16901548 | 2.54918123 | 3.29977464 | 2.41326331 | 2.6079478  | 2.00591026 |
| 75.2653677 | 36.3036228 | 40.7868997 | 41.4008993 | 34.7509917 | 43.5430692 | 46.4224946 |
| 3.17724348 | 6.63850193 | 5.36873017 | 5.0213962  | 6.21152992 | 7.24429944 | 8.41254201 |
| 636.390101 | 893.700106 | 883.81272  | 859.417083 | 1823.25191 | 1381.01461 | 1406.79808 |

|            |            |            |            |            |            |            |
|------------|------------|------------|------------|------------|------------|------------|
| 26.6417749 | 46.688606  | 44.7265434 | 43.5119352 | 88.9339994 | 57.9157593 | 57.9871813 |
| 9.53173043 | 7.49296257 | 7.5509838  | 6.04617093 | 2.68606699 | 6.10452966 | 4.66681162 |
| 163.757482 | 93.4867582 | 94.9956248 | 90.364636  | 55.1692979 | 53.5305433 | 58.6626409 |
| 156.41452  | 103.937469 | 100.982338 | 99.977023  | 66.6480373 | 83.9952372 | 85.988051  |
| 7.97841139 | 14.4162847 | 15.642703  | 15.412612  | 13.9129876 | 20.3999472 | 18.2783455 |
| 6.54276805 | 3.87793677 | 2.99335675 | 4.11959443 | 3.67235722 | 3.30340054 | 3.41823483 |
| 34.0318079 | 48.1565256 | 45.074159  | 44.3112595 | 69.9006965 | 49.6089626 | 52.6449101 |
| 153.001925 | 97.8028799 | 96.4440232 | 92.639636  | 81.0436776 | 83.7054653 | 74.4028959 |
| 19.1811365 | 10.7574404 | 10.3319088 | 10.3707203 | 6.27448462 | 8.09429724 | 8.41254201 |
| 9.67294125 | 5.60876731 | 4.90524267 | 4.87792773 | 5.68690746 | 4.52044285 | 5.48555051 |
| 39.7037759 | 53.1737432 | 58.7084162 | 58.2686914 | 73.3632048 | 62.3589296 | 71.4759043 |
| 0.54130815 | 0.46009419 | 1.73807811 | 1.12725221 | 3.81925151 | 1.31363297 | 1.5351354  |
| 492.966977 | 339.374241 | 326.160014 | 316.983321 | 145.362391 | 234.908483 | 237.10678  |
| 22.0994935 | 29.7527578 | 25.9166758 | 23.2009    | 55.7988448 | 33.2465049 | 33.0770508 |
| 39.9155921 | 21.9530658 | 19.6402827 | 20.7414406 | 15.3819305 | 14.1022362 | 13.3045068 |
| 2.235838   | 1.00782538 | 0.92697499 | 1.20923419 | 0.12590939 | 0.8499978  | 0.45030638 |
| 1.29443253 | 0.81064215 | 0.4634875  | 0.61486484 | 0.86038083 | 0.4829533  | 0.38890097 |
| 27.3948993 | 16.6729372 | 17.5352769 | 19.6141884 | 14.9832175 | 17.2704099 | 17.7871022 |
| 8.6844655  | 6.87950365 | 5.38804215 | 6.29211687 | 1.40598819 | 4.88748736 | 3.295424   |
| 4.44814087 | 2.93583914 | 3.39890831 | 2.91036024 | 1.51091268 | 3.34203681 | 2.72230678 |
| 26.830056  | 33.3896929 | 35.3216096 | 34.760359  | 57.1208934 | 55.9646279 | 58.0690552 |
| 264.370192 | 167.868653 | 150.401693 | 158.922066 | 170.103586 | 129.798528 | 134.08896  |
| 1.03554602 | 0.43818495 | 0.4634875  | 0.3689189  | 0.08393959 | 0.09659066 | 0          |
| 13.3914929 | 9.37715784 | 8.6517666  | 9.36644107 | 4.49076826 | 7.41816263 | 7.18443368 |
| 168.158553 | 70.0876821 | 73.0765286 | 74.3986457 | 29.9034802 | 29.9044681 | 27.6529057 |
| 29.8425535 | 40.0501041 | 35.4181695 | 35.8056292 | 58.5688514 | 63.4021087 | 59.5837221 |
| 3.45966512 | 7.53678107 | 7.57029578 | 7.97274743 | 9.71600796 | 5.31248626 | 6.28382092 |
| 12.379482  | 7.38341634 | 9.03800618 | 8.50563029 | 6.5472883  | 10.4897456 | 8.04410951 |
| 88.1626227 | 60.4695225 | 61.8369568 | 58.8425652 | 41.9488119 | 43.3305697 | 42.8814489 |
| 21.0168772 | 32.0532288 | 29.1417763 | 32.6288275 | 56.9739991 | 33.8840032 | 38.1327634 |
| 2.02402177 | 4.60094193 | 3.1285406  | 2.88986475 | 2.5811425  | 3.57385439 | 2.25153192 |
| 60.367626  | 29.4241191 | 31.8068294 | 27.6074313 | 18.7604992 | 17.1351829 | 13.2226329 |
| 8.84921146 | 21.5148808 | 18.404316  | 20.3110352 | 16.8718583 | 27.6635648 | 25.4627792 |
| 20.8756664 | 12.1596322 | 12.0892989 | 12.0513509 | 2.16144453 | 10.0454286 | 12.1582724 |
| 15.815612  | 11.3928086 | 11.7223713 | 11.6209455 | 8.66676304 | 11.5908791 | 11.4418759 |
| 28.1244885 | 17.2425776 | 15.681327  | 16.6628372 | 17.6692844 | 11.1658802 | 9.12893853 |
| 5.57782743 | 3.50547957 | 4.21001143 | 3.56621607 | 3.50447803 | 1.87385879 | 2.66090136 |
| 75.2889028 | 55.4742141 | 60.5044303 | 60.4822048 | 31.4353778 | 53.2987257 | 48.9401166 |
| 1.41210821 | 5.08294537 | 4.59625101 | 3.97612597 | 8.35198956 | 9.40793021 | 7.88036173 |
| 1.60038931 | 3.87793677 | 2.60711717 | 1.90608101 | 3.23167435 | 3.14885549 | 2.88605456 |
| 0.02353514 | 0.24100172 | 0.40555156 | 0.28693693 | 1.84667106 | 1.50681428 | 1.59654082 |
| 16.5687363 | 31.9217733 | 29.6825118 | 33.3666653 | 22.0341433 | 29.595378  | 41.6533406 |
| 13.5327037 | 20.0031428 | 19.3892269 | 20.0036028 | 23.3142221 | 21.4817626 | 21.5533011 |

|            |            |            |            |            |            |            |
|------------|------------|------------|------------|------------|------------|------------|
| 9.24930878 | 15.949932  | 14.0398087 | 13.1171166 | 27.049534  | 17.3476824 | 17.8075707 |
| 62.0150856 | 40.8607462 | 36.5382643 | 37.1993228 | 21.0898229 | 29.6533324 | 31.5828524 |
| 9.24930878 | 11.4366271 | 13.5956332 | 11.2520266 | 17.2495865 | 12.8658758 | 15.5355703 |
| 79.5016923 | 57.05168   | 59.867135  | 57.3668896 | 43.9004074 | 41.1089846 | 44.2937735 |
| 5.5542923  | 10.3192555 | 10.1774129 | 8.81306271 | 10.5973737 | 11.436334  | 11.6260921 |
| 62.5799289 | 85.3803367 | 84.8954598 | 80.875222  | 128.847276 | 85.3281883 | 99.9680174 |
| 0          | 0          | 0.42486354 | 0          | 0          | 8.1329335  | 2.43574817 |
| 1.36503794 | 0.96400688 | 0.69523124 | 0.51238737 | 1.48992779 | 0.69545275 | 0.42983791 |
| 36.6206729 | 29.1392989 | 26.5732831 | 27.5254494 | 24.1326331 | 18.9510873 | 19.8953548 |
| 0.91787034 | 1.42410107 | 1.98913384 | 1.49617111 | 1.90962575 | 3.18749175 | 2.7837122  |
| 68.0165455 | 89.214455  | 93.9527779 | 80.7727445 | 187.122339 | 88.7668158 | 105.55591  |
| 0.35302705 | 0.65727742 | 1.29390259 | 1.10675671 | 0.94432043 | 0.75340714 | 1.24857679 |
| 2.54179478 | 2.14710623 | 1.96982186 | 1.57815309 | 0.75545634 | 1.52613242 | 0.83920735 |
| 2.47118937 | 1.57746581 | 1.64151822 | 2.25450441 | 1.74174657 | 0.92727033 | 1.26904527 |
| 1.50624876 | 4.22848473 | 3.26372445 | 3.70968454 | 5.79183196 | 5.44771318 | 6.67272188 |
| 6.49569777 | 5.19249161 | 6.2570812  | 6.21013489 | 4.19697968 | 4.249989   | 3.82760427 |
| 25.7239046 | 38.6479122 | 39.8213007 | 39.2488723 | 44.2571507 | 36.2794516 | 35.0215557 |
| 13.3679577 | 9.3114301  | 8.80626243 | 8.50563029 | 5.70789236 | 6.37498351 | 8.08504645 |
| 18.5456878 | 13.0798206 | 13.9625608 | 13.4040535 | 11.1849508 | 11.4556522 | 8.14645187 |
| 4.98944901 | 3.13302236 | 3.18647654 | 3.11531519 | 1.51091268 | 2.62726593 | 3.54104566 |
| 0.11767568 | 0.72300516 | 0.67591927 | 0.7788288  | 0.79742614 | 2.16363077 | 2.558559   |
| 2.4241191  | 5.19249161 | 4.13276351 | 2.93085574 | 3.77728171 | 3.84430824 | 4.56446926 |
| 1.31796766 | 0.92018839 | 0.27036771 | 0.30743242 | 0.73447144 | 0.38636264 | 0.71639652 |
| 30.3603265 | 17.987492  | 19.350603  | 20.5159902 | 19.1801971 | 18.468134  | 14.8191738 |
| 0.07060541 | 0.26291097 | 0.56004739 | 0.16396396 | 0.23083388 | 1.83522252 | 1.06436055 |
| 3.34198943 | 2.4100172  | 2.43330936 | 2.64391881 | 2.6231123  | 1.41022362 | 1.92403637 |
| 7.22528701 | 5.49922107 | 5.92877756 | 5.14436916 | 1.88864086 | 4.19203461 | 3.00886539 |
| 35.7498729 | 66.4726563 | 66.2207761 | 66.3849073 | 109.310336 | 100.241786 | 103.836559 |
| 545.07377  | 274.259958 | 268.687564 | 272.323638 | 136.40184  | 125.915583 | 116.056236 |
| 136.574399 | 116.447649 | 99.5339399 | 106.617563 | 43.2498756 | 74.4907164 | 67.6483001 |
| 916.128737 | 473.831291 | 496.259925 | 485.538269 | 348.370298 | 357.037713 | 331.609715 |
| 0.42363246 | 1.05164387 | 1.54495832 | 1.18873869 | 0.58757715 | 0.88863406 | 1.08482902 |
| 1.22382712 | 0.76682366 | 0.65660729 | 1.1682432  | 0.29378858 | 1.04317912 | 0.53218027 |
| 26.5947046 | 9.92488902 | 11.3361317 | 11.6619365 | 5.41410378 | 10.6829269 | 10.7050109 |
| 0.68251897 | 0.89827914 | 0.84972708 | 0.53288286 | 2.6440972  | 1.31363297 | 0.90061277 |
| 89.5276606 | 60.0751561 | 65.1199933 | 63.392565  | 22.9574788 | 36.3953604 | 34.734997  |
| 2.04755691 | 1.18309935 | 2.35606144 | 1.27072067 | 33.7856864 | 2.04772197 | 3.13167622 |
| 46.1759385 | 24.5821755 | 26.5925951 | 25.2094585 | 8.37297446 | 16.9806379 | 18.7900573 |
| 24.1235153 | 18.0532198 | 17.5932129 | 16.2939183 | 8.62479324 | 14.7204165 | 13.1202906 |
| 5.48368689 | 3.46166107 | 2.43330936 | 2.74639629 | 1.80470126 | 1.83522252 | 2.23106345 |
| 29.9837644 | 88.1189926 | 79.5074176 | 75.9153123 | 109.352306 | 104.704275 | 100.438792 |
| 0.87080006 | 1.6212843  | 1.27459062 | 1.1682432  | 1.59485228 | 1.23636044 | 2.35387428 |
| 27.0183371 | 38.9765509 | 39.4157492 | 36.1745481 | 64.8013662 | 41.901028  | 44.3961158 |

|            |            |            |            |            |            |            |
|------------|------------|------------|------------|------------|------------|------------|
| 153.825654 | 203.624544 | 203.393763 | 205.180397 | 354.497889 | 213.581266 | 231.170923 |
| 280.209339 | 187.389792 | 188.079364 | 187.636254 | 123.517112 | 133.488291 | 125.185175 |
| 97.6002125 | 60.6228873 | 55.1357001 | 55.0099077 | 65.3259887 | 46.8464697 | 42.8200435 |
| 15.3684444 | 23.9029888 | 27.1912665 | 24.5945936 | 44.4250299 | 30.1169675 | 25.2171575 |
| 1.85927581 | 4.0313015  | 4.05551559 | 4.20157641 | 3.37856864 | 4.40453406 | 4.11416288 |
| 13.7209848 | 8.65415268 | 10.8147083 | 11.9078824 | 4.25993437 | 7.61134394 | 8.41254201 |
| 0.30595678 | 0.61345892 | 0.57935937 | 0.40990989 | 0.73447144 | 1.75795    | 1.10529749 |
| 20.9227367 | 12.5978172 | 12.0506749 | 10.4936933 | 10.5554039 | 9.85224724 | 9.35409172 |
| 8.0490168  | 10.6040757 | 9.36630982 | 9.32545008 | 10.9121472 | 14.7204165 | 12.7518581 |
| 10.4025305 | 25.962458  | 23.000567  | 17.318693  | 5.87577155 | 26.7749307 | 22.1059498 |
| 7.46063838 | 5.74022279 | 5.00180257 | 6.1691439  | 4.21796458 | 2.95567417 | 3.97088357 |
| 12.4265523 | 6.17840774 | 7.57029578 | 7.39887358 | 9.21237039 | 4.09544395 | 5.05571259 |
| 253.049791 | 185.001684 | 181.300859 | 174.847065 | 127.96591  | 160.552994 | 176.458697 |
| 4.77763278 | 3.28638709 | 2.33674946 | 2.50045035 | 2.89591598 | 1.58408681 | 1.92403637 |
| 6.49569777 | 4.66666967 | 4.55762705 | 4.50900883 | 2.85394618 | 3.74771758 | 2.90652303 |
| 112.61563  | 89.389729  | 93.1223628 | 81.5515733 | 60.7302959 | 44.3157944 | 35.2876458 |
| 1.74160013 | 3.00156688 | 2.54918123 | 3.29977464 | 6.00168094 | 4.05680769 | 4.89196482 |
| 11.861709  | 13.6275518 | 15.0826556 | 15.9659904 | 25.6435458 | 18.1397258 | 17.561949  |
| 2.73007588 | 2.80438365 | 3.5920281  | 3.83265751 | 3.42053844 | 4.3658978  | 3.60245108 |
| 26.3358181 | 38.5602752 | 35.1671138 | 37.0968454 | 54.3508868 | 41.8430736 | 42.3288002 |
| 271.713155 | 457.311719 | 459.837532 | 474.491197 | 339.262852 | 585.629167 | 600.565438 |
| 10.8967684 | 7.71205505 | 8.63245462 | 9.87882844 | 5.2462246  | 5.6408945  | 6.03819925 |
| 11.1556549 | 6.04695225 | 5.85152964 | 5.90270247 | 5.93872624 | 2.70453846 | 2.94745997 |
| 27.3713642 | 37.8372701 | 36.5962002 | 34.9448184 | 73.1323709 | 40.2783049 | 42.5744218 |
| 0.30595678 | 0.21909247 | 0.63729531 | 1.12725221 | 0.50363756 | 1.2749967  | 0.73686499 |
| 17.204185  | 9.39906709 | 11.1043879 | 12.3792788 | 13.3254105 | 8.84770438 | 9.94767741 |
| 2.58886505 | 4.33803096 | 4.6928109  | 4.32454938 | 10.0727512 | 5.52498571 | 5.07618106 |
| 0.42363246 | 0.43818495 | 0.7338552  | 0.86081078 | 1.97258045 | 1.58408681 | 0.55264874 |
| 3.69501649 | 7.3176886  | 6.14120933 | 5.73873851 | 9.1494157  | 7.41816263 | 8.06457798 |
| 0.77665952 | 2.25665247 | 1.98913384 | 0.98378374 | 2.6650821  | 3.34203681 | 1.35091915 |
| 12.6619036 | 8.15023999 | 8.7483265  | 9.89932393 | 8.43592915 | 5.89203021 | 7.90083021 |
| 2.98896238 | 1.02973462 | 0.44417552 | 1.57815309 | 0.90235063 | 0.17386319 | 0.34796402 |
| 2.82421642 | 1.53364731 | 1.25527864 | 1.82409903 | 1.65780697 | 1.23636044 | 2.23106345 |
| 222.054016 | 159.937505 | 157.334693 | 156.913507 | 89.3956671 | 112.837208 | 120.948201 |
| 8.37850872 | 3.6588443  | 3.82377185 | 3.42274761 | 0.96530533 | 2.27953956 | 2.10825262 |
| 57.5434096 | 36.237895  | 36.6348242 | 41.2779263 | 25.5176364 | 31.6624181 | 28.53305   |
| 19.2517419 | 12.400634  | 14.3294884 | 14.5108102 | 8.83464222 | 9.48520273 | 9.78392963 |
| 171.782964 | 117.521202 | 118.961791 | 122.132653 | 70.9079717 | 75.0702603 | 76.101779  |
| 647.122123 | 468.6388   | 465.882182 | 459.078585 | 224.244624 | 359.626342 | 358.935126 |
| 133.208875 | 58.2566886 | 65.6607287 | 62.2448173 | 38.7381224 | 37.3226307 | 39.7293042 |
| 26.2887479 | 17.1549406 | 16.7627978 | 15.9249994 | 15.1301117 | 10.0067923 | 10.4389207 |
| 138.386605 | 206.275563 | 211.65929  | 210.960127 | 204.665714 | 222.255107 | 222.308075 |
| 4.35400032 | 2.67292817 | 2.43330936 | 2.80788277 | 1.74174657 | 2.08635824 | 2.14918956 |



|            |            |            |            |            |            |            |
|------------|------------|------------|------------|------------|------------|------------|
| 20.4520339 | 9.99061677 | 10.100165  | 10.9650897 | 8.77168753 | 7.78520713 | 7.71661396 |
| 103.13097  | 150.341255 | 156.407718 | 154.105624 | 322.558873 | 206.259694 | 174.350445 |
| 39.6331705 | 27.4084684 | 27.654754  | 26.5416656 | 13.1365464 | 16.845411  | 14.9829215 |
| 7.31942756 | 3.48357032 | 5.17561038 | 3.97612597 | 3.8612213  | 2.10567637 | 1.73982012 |
| 350.979496 | 242.535368 | 238.947116 | 253.201341 | 125.678556 | 152.42006  | 150.770765 |
| 1.03554602 | 3.17684086 | 2.31743748 | 2.17252244 | 2.24538413 | 2.08635824 | 1.71935165 |
| 29.8425535 | 45.3521419 | 47.9323319 | 47.7749981 | 74.5803289 | 58.32144   | 55.8993971 |
| 41.6571922 | 27.3646499 | 27.6740659 | 26.7671161 | 38.9060016 | 18.313589  | 19.8544179 |
| 6.02499503 | 3.33020559 | 2.70367706 | 3.68918904 | 0.90235063 | 1.95113132 | 1.22810832 |
| 4.89530847 | 2.84820215 | 3.24441248 | 2.64391881 | 2.77000659 | 3.16817362 | 3.50010872 |
| 114.427835 | 66.450747  | 71.5701942 | 68.8853576 | 37.7308473 | 44.5669302 | 36.4952856 |
| 165.193126 | 79.8372971 | 84.70234   | 82.9247715 | 35.4434934 | 47.7351038 | 51.5600811 |
| 12.1676658 | 8.50078795 | 10.0422291 | 8.4646393  | 5.62395277 | 6.64543735 | 6.65225341 |
| 3.5773408  | 5.32394709 | 5.33010621 | 4.65247729 | 5.2462246  | 6.74202801 | 5.40367662 |
| 52.6010309 | 36.4788967 | 42.1773622 | 35.6006743 | 25.2238479 | 30.9476472 | 25.3604369 |
| 498.309453 | 263.787337 | 252.05995  | 251.541206 | 126.874696 | 150.430293 | 158.3441   |
| 28.4304453 | 8.8951544  | 8.98007024 | 7.89076545 | 4.65864744 | 4.96475988 | 6.44756869 |
| 39.4448894 | 78.0188296 | 78.8508103 | 79.2355824 | 168.907447 | 115.619019 | 109.854289 |
| 8.09608708 | 21.3396069 | 22.6336394 | 24.2666657 | 19.7887592 | 32.4351434 | 30.4366179 |
| 3.97743813 | 9.28952085 | 8.53589473 | 8.15720688 | 16.2423114 | 9.40793021 | 7.77801937 |
| 0.30595678 | 0.94209763 | 0.84972708 | 0.96328825 | 1.2590939  | 1.21704231 | 2.64043289 |
| 232.079985 | 179.480554 | 176.067313 | 185.01283  | 112.688904 | 127.770124 | 130.588852 |
| 2.8712867  | 1.86228602 | 1.25527864 | 1.96756749 | 1.3010637  | 0.96590659 | 0.40936944 |
| 11.2968657 | 5.21440086 | 6.73988068 | 5.51328807 | 6.35842421 | 8.1329335  | 10.1318937 |
| 81.0785465 | 103.696467 | 106.215885 | 106.105176 | 183.093238 | 132.406476 | 136.299555 |
| 20.7344556 | 16.388117  | 13.9046249 | 15.0027021 | 9.44320428 | 12.0351961 | 10.7664163 |
| 4.14218409 | 3.17684086 | 2.761613   | 3.62770256 | 1.86765596 | 3.01362857 | 1.92403637 |
| 4.11864895 | 6.17840774 | 6.68194474 | 6.47657632 | 10.0097965 | 7.32157197 | 8.22832576 |
| 9.27284392 | 13.1674576 | 12.7459062 | 13.424549  | 23.6289956 | 15.8601862 | 15.7607235 |
| 22.0288881 | 19.4115931 | 18.6167478 | 17.1137381 | 10.0517663 | 17.1931373 | 12.5471734 |
| 34.573116  | 67.4585724 | 64.3088901 | 62.4907633 | 89.8153651 | 70.3566362 | 77.8825361 |
| 84.6794224 | 34.9014309 | 41.6752507 | 41.7903137 | 17.144662  | 23.9544835 | 22.5971931 |
| 1.29443253 | 1.16119011 | 0.38623958 | 0.3894144  | 0.35674327 | 0.38636264 | 1.14623443 |
| 2.65947046 | 6.17840774 | 6.66263276 | 4.85743224 | 5.09933031 | 5.83407582 | 4.60540621 |
| 11.8852441 | 14.7887419 | 16.531054  | 17.236711  | 17.6273146 | 16.9613198 | 16.9683633 |
| 18.92225   | 28.8325694 | 30.358431  | 28.1813052 | 27.1124887 | 34.6953648 | 32.2378435 |
| 6.04853017 | 9.26761161 | 7.78272754 | 8.01373842 | 8.35198956 | 12.0545143 | 9.55877644 |
| 0          | 0.65727742 | 0.34761562 | 0.84031528 | 2.85394618 | 2.27953956 | 0          |
| 0.16474596 | 0.19718323 | 0.27036771 | 0.06148648 | 1.23810901 | 1.21704231 | 0.59358569 |
| 0.04707027 | 0          | 0.38623958 | 0          | 0          | 1.83522252 | 3.84807274 |
| 0          | 0.7887329  | 0.38623958 | 1.35270265 | 5.09933031 | 2.00908571 | 0          |
| 0          | 1.29264559 | 0.21243177 | 1.74211705 | 1.53189758 | 2.85908351 | 1.18717138 |
| 0.40009733 | 1.05164387 | 1.69945415 | 0.7788288  | 2.07750494 | 3.74771758 | 2.43574817 |

|            |            |            |            |            |            |            |
|------------|------------|------------|------------|------------|------------|------------|
| 0          | 0          | 0.48279948 | 1.1682432  | 0.37772817 | 2.1829489  | 1.88309943 |
| 7.29589242 | 9.6838873  | 10.3898447 | 9.46891854 | 11.7515431 | 11.2045165 | 12.1378039 |
| 2.00048663 | 3.39593333 | 3.90101976 | 3.97612597 | 6.4843336  | 6.99316373 | 4.11416288 |
| 214.381562 | 160.244235 | 165.928524 | 152.302021 | 110.149732 | 100.550876 | 95.874323  |
| 19.5812339 | 28.3067475 | 25.1055727 | 26.5006746 | 47.8665532 | 33.5942313 | 36.9660605 |
| 1.60038931 | 1.31455484 | 2.64574113 | 2.78738728 | 3.04281027 | 2.56931153 | 3.23401858 |
| 9.50819529 | 13.0798206 | 16.0675665 | 14.9822066 | 25.1818781 | 19.5499494 | 16.0677505 |
| 2.28290827 | 1.18309935 | 1.40977447 | 1.82409903 | 0.54560736 | 1.10113351 | 0.71639652 |
| 0.28242164 | 1.66510279 | 0.54073541 | 1.00427924 | 1.55288248 | 1.89317692 | 1.51466693 |
| 60.532372  | 44.2347703 | 40.0337325 | 41.4828812 | 16.5990546 | 21.2113088 | 23.6820221 |
| 1.9769515  | 2.49765419 | 3.53409216 | 2.52094585 | 4.40682866 | 2.1249945  | 2.68136984 |
| 4.75409764 | 7.33959784 | 7.41579994 | 7.82927897 | 12.6538937 | 8.07497911 | 5.69023523 |
| 9.08456283 | 23.7277148 | 21.4749207 | 20.4135127 | 16.0324624 | 22.563578  | 18.6672465 |
| 219.818178 | 173.959424 | 173.981619 | 172.613056 | 108.785713 | 121.994003 | 128.828563 |
| 5.27187066 | 6.28795397 | 8.34277494 | 6.96846819 | 8.18411037 | 9.91020163 | 8.31019965 |
| 11.2733306 | 16.9358482 | 15.5847671 | 14.3878373 | 19.2851216 | 20.9408549 | 21.3895533 |
| 28.7834724 | 36.3474413 | 36.9824398 | 38.1011246 | 62.8078009 | 44.6442027 | 42.06271   |
| 68.7696699 | 98.0877001 | 99.7077477 | 96.287834  | 143.368826 | 104.665638 | 118.082615 |
| 1.27089739 | 2.23474322 | 1.35183853 | 2.39797288 | 3.00084047 | 3.26476428 | 2.35387428 |
| 52.0597227 | 79.1581105 | 76.8230525 | 81.8590058 | 72.4188843 | 82.93274   | 90.1226824 |
| 1347.24537 | 895.452846 | 931.281564 | 943.428116 | 1004.46315 | 819.533107 | 702.559834 |
| 19.3694176 | 24.9546327 | 25.7042441 | 24.943017  | 40.7736576 | 29.1510609 | 31.5623839 |
| 6.56630318 | 3.30829634 | 5.21423434 | 4.93941422 | 5.14130011 | 2.37613022 | 4.38025302 |
| 31.2546617 | 40.9702924 | 45.2672788 | 41.2779263 | 75.5036644 | 46.4987433 | 47.95763   |
| 63.6625452 | 116.42574  | 94.6286972 | 92.3731945 | 169.767828 | 109.108809 | 119.167444 |
| 40.7393219 | 24.7574494 | 26.0904837 | 24.0822062 | 15.9485228 | 21.3658538 | 15.3104171 |
| 6.21327613 | 9.70579655 | 7.87928744 | 8.42364831 | 8.18411037 | 11.0886077 | 10.0295513 |
| 120.146874 | 83.2332305 | 84.7988999 | 79.2355824 | 54.3928566 | 56.8725801 | 55.7561178 |
| 9.29637906 | 5.12676387 | 6.08327339 | 3.32027014 | 4.34387397 | 2.87840164 | 3.33636094 |
| 111.721295 | 59.4178787 | 62.1652605 | 59.2114841 | 58.442942  | 34.3862747 | 35.3285827 |
| 0.56484328 | 1.86228602 | 1.1973427  | 0.96328825 | 1.59485228 | 1.39090549 | 0.59358569 |
| 113.910062 | 280.00018  | 297.501037 | 308.02679  | 867.872443 | 790.111592 | 679.655614 |
| 0.94140547 | 0.92018839 | 2.25950155 | 2.23400892 | 3.46250823 | 3.05226483 | 2.25153192 |
| 31.3723374 | 22.7417987 | 22.131528  | 18.8968461 | 12.3601052 | 14.5851895 | 15.6583811 |
| 139.798713 | 107.859224 | 112.202598 | 104.854951 | 67.1097051 | 70.0282279 | 77.3708243 |
| 0.28242164 | 0.76682366 | 0.54073541 | 0.57387385 | 2.77000659 | 2.00908571 | 0.61405416 |
| 0.87080006 | 0.54773118 | 0.27036771 | 0.69684682 | 0.20984898 | 0.32840824 | 0.34796402 |
| 2.61240019 | 0.72300516 | 0.23174375 | 0.67635132 | 0.60856205 | 0.11590879 | 0.8801443  |
| 8.61386009 | 3.92175527 | 4.44175517 | 6.37409885 | 2.43424821 | 2.45340274 | 2.68136984 |
| 3.50673539 | 6.09077075 | 3.99757966 | 6.72252226 | 9.04449121 | 5.38975878 | 8.80144298 |
| 9.03749255 | 5.34585634 | 7.47373588 | 6.1486484  | 4.74258704 | 5.73748516 | 5.36273967 |
| 16.0274282 | 11.6776288 | 11.4906275 | 11.559459  | 8.22608017 | 10.0647467 | 7.88036173 |
| 284.186778 | 216.682456 | 207.893454 | 209.013055 | 106.435405 | 160.668903 | 152.817612 |

|            |            |            |            |            |            |            |
|------------|------------|------------|------------|------------|------------|------------|
| 0.94140547 | 2.76056516 | 1.89257394 | 1.37319814 | 4.02910049 | 2.16363077 | 1.45326151 |
| 52.5539606 | 34.6823385 | 36.3644565 | 33.9405392 | 31.0366647 | 34.8305917 | 26.9365092 |
| 342.036144 | 770.635864 | 815.50625  | 716.829926 | 896.831603 | 773.459363 | 760.280925 |
| 3783.13204 | 2514.56813 | 2545.41539 | 2456.24157 | 2609.99674 | 2129.74676 | 2042.32367 |
| 0.84726493 | 0.08763699 | 0.30899166 | 0.3894144  | 0          | 0.15454505 | 0          |
| 21.8876773 | 12.4444525 | 14.3681124 | 13.342567  | 7.19782015 | 10.9147445 | 10.9915695 |
| 33.3257538 | 51.2238202 | 51.4084881 | 52.2225204 | 54.3508868 | 58.5918939 | 59.317632  |
| 6.40155722 | 3.17684086 | 4.13276351 | 4.42702685 | 4.11304008 | 2.83976538 | 2.98839692 |
| 6.63690859 | 3.6588443  | 4.22932341 | 4.40653136 | 5.77084706 | 3.47726373 | 4.29837913 |
| 4.82470306 | 3.76839053 | 2.16294165 | 2.39797288 | 2.53917271 | 1.95113132 | 3.54104566 |
| 0.54130815 | 1.51173806 | 0.7338552  | 0.43040539 | 1.72076167 | 0.81136154 | 0.83920735 |
| 0.82372979 | 1.18309935 | 1.85394999 | 0.92229726 | 2.85394618 | 1.62272307 | 1.35091915 |
| 1.85927581 | 1.18309935 | 0.90766301 | 1.1682432  | 0.54560736 | 0.65681648 | 0.98248666 |
| 22.2171692 | 12.4444525 | 15.2950874 | 14.7362607 | 5.05736051 | 11.9192873 | 11.6874975 |
| 5.03651929 | 10.2535277 | 6.41157703 | 7.56283754 | 10.1986606 | 9.56247526 | 7.71661396 |
| 1.15322171 | 1.48982882 | 2.18225363 | 1.25022518 | 1.76273146 | 2.66590219 | 3.66385649 |
| 0.32949192 | 0.30672946 | 1.39046249 | 0.43040539 | 1.97258045 | 1.89317692 | 1.51466693 |
| 22.4525206 | 13.8028258 | 15.4302712 | 15.3101345 | 14.248746  | 9.65906592 | 12.6085788 |
| 229.53819  | 164.976632 | 172.262853 | 169.087831 | 85.5134609 | 127.151944 | 124.693932 |
| 62.085691  | 40.4663798 | 44.6492955 | 41.2164398 | 29.2949182 | 36.7430868 | 32.6472129 |
| 1.15322171 | 0.30672946 | 0.34761562 | 0.47139638 | 0.08393959 | 0.52158956 | 0.47077486 |
| 144.999978 | 119.90931  | 116.277426 | 120.800446 | 54.4348264 | 80.150929  | 72.5402649 |
| 3.15370834 | 7.40532559 | 5.21423434 | 5.16486466 | 7.21880505 | 8.57725054 | 14.1846511 |
| 18.2632662 | 28.6353862 | 29.431456  | 28.1813052 | 28.7912806 | 29.749923  | 30.6617711 |
| 13.9092659 | 23.0485282 | 20.3548259 | 22.2581072 | 18.8654237 | 24.1090285 | 28.0008697 |
| 65.9219183 | 48.2660718 | 48.3765074 | 45.0900883 | 27.4062773 | 38.8873994 | 36.9046551 |
| 637.684533 | 452.119227 | 452.421732 | 452.069126 | 263.486384 | 320.198035 | 326.656345 |
| 4.61288682 | 6.55086494 | 7.4544239  | 8.23918886 | 9.79994755 | 8.82838625 | 8.49441589 |
| 78.0895841 | 119.449216 | 125.431304 | 124.120716 | 110.653369 | 127.461034 | 138.100781 |
| 15.4625849 | 14.3286477 | 11.2781957 | 11.6209455 | 3.65137232 | 8.22952416 | 9.80439811 |
| 2.44765423 | 3.98748301 | 3.10922862 | 2.56193684 | 3.63038742 | 4.17271648 | 3.54104566 |
| 57.260988  | 78.5446515 | 79.9515931 | 69.2132855 | 112.311176 | 90.0804488 | 84.9236905 |
| 34.6201863 | 23.3990761 | 24.9317649 | 25.7218458 | 18.4457257 | 20.7476736 | 20.8164361 |
| 8.63739523 | 12.5320895 | 12.5914103 | 14.1009003 | 13.8920027 | 12.3636044 | 13.3863807 |
| 14.8742065 | 10.100163  | 10.0229171 | 8.54662128 | 8.54085365 | 7.20566318 | 7.73708243 |
| 1.36503794 | 2.69483742 | 3.24441248 | 2.93085574 | 1.80470126 | 6.25907472 | 5.11711801 |
| 9.69647638 | 7.60250881 | 7.33855203 | 7.3373871  | 4.19697968 | 3.97953516 | 3.21355011 |
| 0.56484328 | 1.73083054 | 0.65660729 | 0.88130627 | 1.63682207 | 0.75340714 | 0.53218027 |
| 9.08456283 | 12.5101802 | 11.2781957 | 13.1376121 | 15.2140513 | 14.7010983 | 14.7577683 |
| 167.570174 | 95.4585905 | 97.3130623 | 96.8412124 | 52.3573215 | 54.6316768 | 54.4461356 |
| 4.70702737 | 3.59311656 | 2.10500571 | 2.72590079 | 1.97258045 | 2.37613022 | 3.52057719 |
| 13.3444226 | 14.3286477 | 16.0482546 | 15.8225219 | 26.5458965 | 24.3022099 | 22.3106345 |
| 15.7685417 | 21.8216103 | 20.6831295 | 18.5894137 | 28.5814316 | 23.7033478 | 23.3135896 |

|            |            |            |            |            |            |            |
|------------|------------|------------|------------|------------|------------|------------|
| 5.03651929 | 7.16432387 | 5.83221766 | 7.66531501 | 4.84751153 | 9.83292911 | 10.9506325 |
| 12.3088766 | 8.45696946 | 7.70547963 | 7.78828798 | 3.8822062  | 8.15225164 | 4.72821704 |
| 36.5029973 | 65.7934696 | 62.6480599 | 65.667565  | 51.014288  | 72.7714026 | 69.2448409 |
| 151.519211 | 109.896784 | 107.509787 | 106.08468  | 44.1732111 | 89.7134043 | 85.1079067 |
| 75.665465  | 56.4163118 | 62.7832438 | 57.3668896 | 34.8769011 | 44.25784   | 38.808223  |
| 204.237918 | 141.16128  | 146.577921 | 148.633327 | 92.9211301 | 115.271293 | 115.60593  |
| 3.36552457 | 5.2801286  | 6.29570516 | 5.3903151  | 7.05092586 | 7.74657087 | 7.88036173 |
| 0.30595678 | 1.11737161 | 1.98913384 | 1.18873869 | 11.4577545 | 8.90565878 | 11.2371911 |
| 11.4616116 | 12.9921836 | 14.9860957 | 15.0027021 | 18.5296653 | 19.781767  | 21.8807966 |
| 1.9769515  | 4.42566795 | 3.8623958  | 3.75067553 | 1.3010637  | 4.53976098 | 4.62587468 |
| 1.29443253 | 1.97183226 | 0.98491093 | 1.43468463 | 4.67963234 | 2.64658406 | 2.96792845 |
| 19.9107258 | 29.4022099 | 32.5020607 | 25.9268008 | 40.9205519 | 24.7272088 | 28.0827436 |
| 3.34198943 | 4.71048817 | 3.64996403 | 3.0948197  | 6.4843336  | 6.79998241 | 6.26335244 |
| 1.76513526 | 3.74648129 | 3.76583591 | 2.7054053  | 3.63038742 | 7.59202581 | 4.52353232 |
| 7.17821674 | 10.0782538 | 9.77186138 | 8.71058524 | 10.9121472 | 14.1215544 | 13.9390295 |
| 0.28242164 | 0.46009419 | 0.0965599  | 0.47139638 | 0.77644124 | 1.00454286 | 1.22810832 |
| 3.1301732  | 5.41158408 | 6.04464943 | 5.90270247 | 9.63206836 | 9.34997581 | 8.69910062 |
| 7.41356811 | 9.17997462 | 10.9112681 | 9.50990953 | 13.3463954 | 14.5272351 | 12.1787409 |
| 19.3458825 | 13.5180056 | 12.2631067 | 12.5432427 | 11.8774525 | 7.765889   | 9.21081242 |
| 74.1827514 | 35.9530748 | 36.9631278 | 35.7236472 | 20.1455025 | 23.2783489 | 23.4773374 |
| 5.3660112  | 3.98748301 | 6.39226506 | 6.96846819 | 8.98153651 | 11.0692895 | 8.18738881 |
| 5.41308148 | 7.53678107 | 7.68616765 | 5.94369346 | 12.1082864 | 9.25338515 | 9.35409172 |
| 5.03651929 | 6.17840774 | 6.81712859 | 6.90698171 | 7.36569934 | 9.4658846  | 9.59971338 |
| 4.49521114 | 5.54303957 | 6.68194474 | 6.88648621 | 5.47705848 | 9.71702032 | 6.20194703 |
| 2.16523259 | 2.76056516 | 3.39890831 | 3.21779266 | 5.37213399 | 3.53521813 | 6.3656948  |
| 5.74257339 | 6.63850193 | 7.84066348 | 7.09144116 | 9.31729489 | 12.0931505 | 14.7577683 |
| 0.30595678 | 0.67918667 | 0.28967969 | 0.26644143 | 2.68606699 | 1.08181538 | 1.3918561  |
| 2.02402177 | 1.94992301 | 2.10500571 | 2.99234222 | 4.07107029 | 4.82953296 | 5.58789287 |
| 12.5206928 | 6.39750021 | 6.39226506 | 6.82499973 | 3.9031911  | 2.35681208 | 4.78962246 |
| 13.1796766 | 6.35368172 | 7.12612026 | 8.60810777 | 2.37129352 | 5.94998461 | 5.77210911 |
| 11.7675684 | 14.1533738 | 14.6384801 | 15.0846841 | 17.7112542 | 20.1294934 | 22.8632833 |
| 37.5385433 | 25.4366361 | 28.562417  | 28.3042782 | 15.4029154 | 24.7851631 | 24.9305989 |
| 2.70654074 | 5.58685806 | 4.34519528 | 4.30405388 | 5.70789236 | 4.71362417 | 4.85102787 |
| 17.6984229 | 12.5759079 | 11.5292515 | 13.1581076 | 10.1776757 | 12.0738324 | 12.8542004 |
| 1.74160013 | 3.46166107 | 3.57271612 | 2.43896387 | 3.65137232 | 2.93635604 | 3.62291955 |
| 0.32949192 | 0.63536817 | 1.08147083 | 0.69684682 | 2.09848984 | 1.19772417 | 1.55560387 |
| 1.05908116 | 2.84820215 | 2.08569373 | 1.78310804 | 2.05652004 | 2.56931153 | 2.84511761 |
| 0          | 0.3724572  | 0.34761562 | 0.57387385 | 1.86765596 | 1.46817802 | 0.57311722 |
| 1.83574067 | 3.43975183 | 3.76583591 | 3.99662146 | 7.91130669 | 5.29316812 | 4.42118996 |
| 1.43564335 | 2.65101892 | 1.52564634 | 2.04954947 | 4.51175315 | 2.22158516 | 2.94745997 |
| 6.51923291 | 7.07668688 | 10.1774129 | 9.03851315 | 8.87661202 | 12.749967  | 14.3688674 |
| 2.09462718 | 2.47574494 | 3.36028435 | 2.95135123 | 3.52546293 | 5.09998681 | 6.05866772 |
| 1.01201088 | 1.97183226 | 2.3946854  | 1.61914408 | 2.6650821  | 2.72385659 | 2.98839692 |

|            |            |            |            |            |            |            |
|------------|------------|------------|------------|------------|------------|------------|
| 1.41210821 | 1.84037677 | 2.0277578  | 1.33220715 | 3.54644783 | 2.91703791 | 2.49715359 |
| 6.8957951  | 8.4788787  | 9.05731816 | 8.50563029 | 15.906553  | 12.0351961 | 12.3629571 |
| 13.2267469 | 14.4162847 | 16.7048619 | 17.6876119 | 40.3539596 | 22.0613066 | 21.7375173 |
| 15.0389525 | 10.1439815 | 12.0313629 | 10.4527023 | 6.37940911 | 13.5033742 | 11.9740561 |
| 2.65947046 | 2.97965763 | 2.22087759 | 3.75067553 | 5.81281685 | 4.71362417 | 6.42710022 |
| 5.64843285 | 6.39750021 | 6.6240088  | 7.3373871  | 10.1986606 | 10.837472  | 12.5676418 |
| 4.68349223 | 9.44288558 | 9.98429315 | 11.7029275 | 21.6354302 | 21.7328983 | 27.6529057 |
| 1.24736225 | 1.59937505 | 1.62220624 | 1.27072067 | 4.42781356 | 3.16817362 | 2.45621664 |
| 8.4961844  | 4.79812516 | 5.29148225 | 5.10337818 | 2.30833882 | 4.23067087 | 2.57902748 |
| 6.35448695 | 12.312997  | 10.8340202 | 10.7396392 | 2.70705189 | 12.9045121 | 13.4068492 |
| 4.84823819 | 6.83568516 | 5.73565777 | 6.02567544 | 6.96698627 | 8.51929614 | 8.08504645 |
| 45.1874628 | 31.3740421 | 33.9504591 | 34.7398635 | 22.097098  | 20.3999472 | 21.3076794 |
| 3.78915703 | 3.89984602 | 5.50391402 | 6.10765741 | 7.26077484 | 9.98747416 | 9.35409172 |
| 5.27187066 | 8.85133591 | 6.19914527 | 8.01373842 | 4.88948133 | 9.44656647 | 13.52966   |
| 2.75361101 | 4.4475772  | 2.99335675 | 5.10337818 | 2.68606699 | 4.7329423  | 6.09960467 |
| 10.7555575 | 6.72613892 | 7.33855203 | 6.84549522 | 5.68690746 | 6.70339175 | 5.42414509 |
| 2.70654074 | 1.09546236 | 1.1973427  | 0.45090088 | 0.44068287 | 0.94658846 | 0.32749555 |
| 1.27089739 | 0          | 0.05793594 | 0.16396396 | 0          | 0.21249945 | 0.45030638 |
| 4.30693004 | 5.12676387 | 3.76583591 | 5.75923401 | 8.20509527 | 5.83407582 | 7.57333465 |
| 0.09414055 | 0.94209763 | 1.02353489 | 0.22545044 | 4.80554173 | 2.72385659 | 2.2720004  |

**Table S4:** List of Reagents, data and software used in this study with source and identifier.

| REAGENT or RESOURCE                                                                              | SOURCE                                                            | IDENTIFIER                                                                                              |
|--------------------------------------------------------------------------------------------------|-------------------------------------------------------------------|---------------------------------------------------------------------------------------------------------|
| <b>Chemicals</b>                                                                                 |                                                                   |                                                                                                         |
| DMEM                                                                                             | GIBCO                                                             | Cat# 11965-092                                                                                          |
| RPMI                                                                                             | GIBCO                                                             | Cat# 11875-093                                                                                          |
| Trypsin-EDTA                                                                                     | GIBCO                                                             | Cat# 25200-056                                                                                          |
| Fetal Bovine Serum                                                                               | GIBCO                                                             | Cat# 10438-026                                                                                          |
| Penicillin-Streptomycin                                                                          | GIBCO                                                             | Cat# 15140-122                                                                                          |
| Agarose, Low gelling                                                                             | Sigma-Aldrich                                                     | Cat# A9045                                                                                              |
| Real Time-Glo Annexin V apoptosis reagent                                                        | Promega Corp                                                      | Cat# JA1011                                                                                             |
| Matrigel Invasion Chamber with 8.0 $\mu$ m PET Membrane                                          | Corning                                                           | Cat# 354483                                                                                             |
| <b>Antibodies</b>                                                                                |                                                                   |                                                                                                         |
| Cathepsin B (D1C7Y) XP(R) Rabbit mAb                                                             | Cell Signaling Technology                                         | 31718T                                                                                                  |
| p21 (CDKN1A) Rabbit mAb                                                                          | Cell Signaling Technology                                         | 2947T                                                                                                   |
| MDM2 (D1V2Z) Rabbit mAb                                                                          | Cell Signaling Technology                                         | 86934S                                                                                                  |
| Bax Antibody Rabbit mAb                                                                          | Cell Signaling Technology                                         | 2772T                                                                                                   |
| Cathepsin S Antibody                                                                             | Cell Signaling Technology                                         | 25084S                                                                                                  |
| $\beta$ -Actin (D6A8) Rabbit mAb                                                                 | Cell Signaling Technology                                         | 8457L                                                                                                   |
| COL6A1 (B-4) Mouse mAb                                                                           | Santa Cruz                                                        | sc-377143                                                                                               |
| <b>Deposited Data</b>                                                                            |                                                                   |                                                                                                         |
| RNA-Seq performed with TP-472-treated A375 cells                                                 | This paper                                                        | GEO: GSE179079                                                                                          |
| <b>Experimental Models: Cell Lines</b>                                                           |                                                                   |                                                                                                         |
| A375-MA2                                                                                         | ATCC                                                              | ATCC CRL-3223                                                                                           |
| A375                                                                                             | ATCC                                                              | ATCC CRL-1619                                                                                           |
| M14                                                                                              | NCI-60                                                            |                                                                                                         |
| SKMEL-28                                                                                         | MSKCC                                                             |                                                                                                         |
| A2058                                                                                            | ATCC                                                              | ATCC CRL-11147                                                                                          |
| <b>Experimental Models: Organisms/Strains</b>                                                    |                                                                   |                                                                                                         |
| Mouse: NSG                                                                                       | Jackson Laboratory                                                | Stock No. 005557                                                                                        |
| <b>Drugs</b>                                                                                     |                                                                   |                                                                                                         |
| TP-472                                                                                           | Tocris                                                            | Cat.No.# 6000                                                                                           |
| Structural Genome Consortium's epigenetic chemical probe inhibitor library                       | Cayman chemicals                                                  | Cat.No.17525                                                                                            |
| <b>Software and Algorithms</b>                                                                   |                                                                   |                                                                                                         |
| Prism 8.0                                                                                        | GraphPad                                                          | www.graphpad.com/scientific software/prism                                                              |
| ImageJ                                                                                           | <a href="https://imagej.nih.gov/ij">https://imagej.nih.gov/ij</a> | N/A                                                                                                     |
| <b>Other</b>                                                                                     |                                                                   |                                                                                                         |
| Reactome pathway analysis from RNA sequencing data                                               | Reactome Pathway Database                                         | <a href="https://reactome.org/">https://reactome.org/</a>                                               |
| mRNA expression in normal and Melanoma cancer samples were analyzed and represented as box plot. | Oncomine Research Premium Edition                                 | <a href="https://www.oncomine.org/resource/login.html">https://www.oncomine.org/resource/login.html</a> |
| The Human Protein Atlas                                                                          | The Human Tissue Atlas Dataset                                    | <a href="https://www.proteinatlas.org/">https://www.proteinatlas.org/</a>                               |
